# Supplementary material for: Syn-versus anti-carbopalladation of alkynes with organoborons: access to indoles symmetrically and unsymmetrically substituted on their 2,3-positions
Source: Royal Society of Chemistry journal article supplement (doi:10.1039/d3cc01753b), 2023-01-01

# Supporting Information

## ***Syn-* versus *anti*-Carbopalladation of Alkynes with Organoborons: Access to Indoles Symmetrically and Unsymmetrically Substituted on their 2,3-Positions**

*Mehran Ghasemi, Banafshe Rahimi, Maryam Dehghan, Mohammad Hossein Bernoosha, Farnaz Jafarpour\**

*jafarpour@ut.ac.ir*

## Contents

|                                                                  |            |
|------------------------------------------------------------------|------------|
| <b>1 General remarks</b>                                         | <b>S2</b>  |
| <b>2 General experimental procedure for synthesis of indoles</b> | <b>S2</b>  |
| <b>3 Optimization of reaction conditions</b>                     | <b>S3</b>  |
| <b>4 Experimental characterization data</b>                      | <b>S4</b>  |
| <b>5 Copies of <sup>1</sup>H and <sup>13</sup>C NMR Spectra</b>  | <b>S18</b> |

## 1 General remarks

The following includes general experimental procedures, specific details for representative reactions and spectroscopic information for new compounds. Palladium catalysts and ligands were commercially available and used as received. The reactions were carried out in oil bath using microwave vials (2-5 mL).  $^1\text{H}$  NMR spectra were recorded at room temperature on 500 MHz spectrometer, using  $\text{CDCl}_3$  as the NMR solvent.  $^1\text{H}$  NMR spectra are referenced to tetramethylsilane (0.00 ppm) and  $^{13}\text{C}$  NMR spectra are referenced from the solvent central peak (77.23 and 39.51 ppm for  $\text{CDCl}_3$  and  $\text{DMSO-d}_6$  respectively). Chemical shifts are given in ppm. Elemental analyses (CHN) were recorded on a Thermo Finnigan Flash EA 1112 elemental analyzer.

## 2 General experimental procedure for synthesis of indoles

A vial equipped with a stir bar was charged with aryl boronic acid (0.2 mmol, 1 equiv), amine (0.4 mmol, 2 equiv),  $\text{Pd}(\text{OAc})_2$  (0.006 mmol, 3 mol%), alkyne (0.2 mmol, 1 equiv), KOAc (0.4 mmol, 2 equiv) and DMF/DMSO (2 ml) was added and the vial was capped. The resulting mixture was heated in a sand bath at  $120^\circ\text{C}$  for 18 h, cooled then filtered through a short plug of silica. Removal of the solvent gave a crude mixture which was purified by column chromatography (hexane/EtOAc gradient).

### 3 Optimization of reaction conditions

Table S1. Optimization of reaction conditions<sup>a</sup>

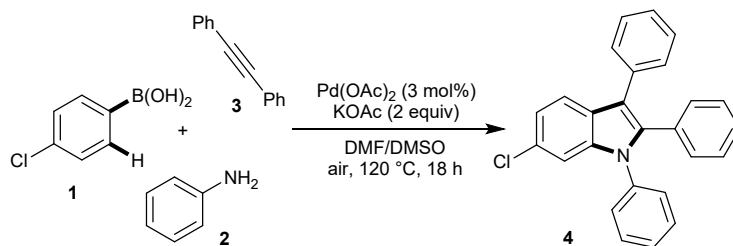

| Entry     | Catalyst                   | Base                            | Solvent          | Ligand           | Yield (%) <sup>b</sup> |
|-----------|----------------------------|---------------------------------|------------------|------------------|------------------------|
| 1         | PdCl <sub>2</sub>          | Cs <sub>2</sub> CO <sub>3</sub> | DMF              | PPh <sub>3</sub> | 21                     |
| 2         | Pd(OAc) <sub>2</sub>       | Cs <sub>2</sub> CO <sub>3</sub> | DMF              | PPh <sub>3</sub> | 39                     |
| 3         | Pd(dba) <sub>2</sub>       | Cs <sub>2</sub> CO <sub>3</sub> | DMF              | PPh <sub>3</sub> | 20                     |
| 4         | Pd(OAc) <sub>2</sub>       | NaHCO <sub>3</sub>              | DMF              | PPh <sub>3</sub> | 43                     |
| 5         | Pd(OAc) <sub>2</sub>       | K <sub>2</sub> CO <sub>3</sub>  | DMF              | PPh <sub>3</sub> | 40                     |
| 6         | Pd(OAc) <sub>2</sub>       | DMAP <sup>c</sup>               | DMF              | PPh <sub>3</sub> | 35                     |
| 7         | Pd(OAc) <sub>2</sub>       | Na <sub>3</sub> PO <sub>4</sub> | DMF              | PPh <sub>3</sub> | 43                     |
| 8         | Pd(OAc) <sub>2</sub>       | NaOAc                           | DMF              | PPh <sub>3</sub> | 47                     |
| 9         | Pd(OAc) <sub>2</sub>       | DABCO <sup>d</sup>              | DMF              | PPh <sub>3</sub> | 29                     |
| 10        | Pd(OAc) <sub>2</sub>       | NaOH                            | DMF              | PPh <sub>3</sub> | Trace                  |
| 11        | Pd(OAc) <sub>2</sub>       | K <sub>3</sub> PO <sub>4</sub>  | DMF              | PPh <sub>3</sub> | 49                     |
| 12        | Pd(OAc) <sub>2</sub>       | KOAc                            | DMF              | PPh <sub>3</sub> | 54                     |
| 13        | Pd(OAc) <sub>2</sub>       | KOAc                            | ACN              | PPh <sub>3</sub> | 25                     |
| 14        | Pd(OAc) <sub>2</sub>       | KOAc                            | THF              | PPh <sub>3</sub> | Trace                  |
| 15        | Pd(OAc) <sub>2</sub>       | KOAc                            | H <sub>2</sub> O | PPh <sub>3</sub> | 0                      |
| 16        | Pd(OAc) <sub>2</sub>       | KOAc                            | DMSO             | PPh <sub>3</sub> | 58                     |
| 17        | Pd(OAc) <sub>2</sub>       | KOAc                            | Chlorobenzene    | PPh <sub>3</sub> | 32                     |
| 18        | Pd(OAc) <sub>2</sub>       | KOAc                            | Ethanol          | PPh <sub>3</sub> | 0                      |
| 19        | Pd(OAc) <sub>2</sub>       | KOAc                            | Toluene          | PPh <sub>3</sub> | 34                     |
| 20        | Pd(OAc) <sub>2</sub>       | KOAc                            | TFA              | PPh <sub>3</sub> | 0                      |
| 21        | Pd(OAc) <sub>2</sub>       | KOAc                            | DMF/DMSO         | PPh <sub>3</sub> | 68                     |
| <b>22</b> | <b>Pd(OAc)<sub>2</sub></b> | <b>KOAc</b>                     | <b>DMF/DMSO</b>  |                  | <b>68</b>              |
| 23        | Pd(OAc) <sub>2</sub>       | KOAc                            | DMF/DMSO         |                  | 48 <sup>e</sup>        |
| 24        | Pd(OAc) <sub>2</sub>       | KOAc                            | DMF/DMSO         |                  | 40 <sup>f</sup>        |
| 25        | Pd(OAc) <sub>2</sub>       | KOAc                            | DMF/DMSO         |                  | 21 <sup>g</sup>        |

<sup>a</sup>All reactions were run under the following conditions: Arylboronic acid (0.2 mmol, 1 equiv), acetylene (1 equiv), amine (2 equiv), Pd catalyst (3 mol %), Ligand (10 mol %), Solvent (2 mL), 120 °C, 18 h. <sup>b</sup>Isolated yields. <sup>c</sup>4-Dimethylaminopyridine. <sup>d</sup>1,4-Diazabicyclo[2.2.2]octane. <sup>e</sup>120 °C. <sup>f</sup>80 °C. <sup>g</sup>Under N<sub>2</sub>

## 4 Experimental characterization data

### 6-Chloro-1, 2, 3-triphenyl-1*H*-indole (4)

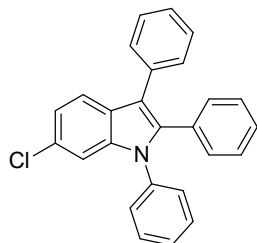

White solid; Yield: 68% (52 mg); mp: 184-186 °C;  $R_f = 0.5$  on silica gel (Hexane/EtOAc 98:2);  $^1\text{H NMR}$  (500 MHz,  $\text{CDCl}_3$ )  $\delta$  7.09-7.11 (m, 2H), 7.14-7.24 (m, 7H), 7.27-7.29 (m, 1H), 7.33-7.36 (m, 5H), 7.40-7.43 (m, 2H), 7.72 (d,  $J = 8.4$  Hz, 1H).  $^{13}\text{C NMR}$  (125 MHz,  $\text{CDCl}_3$ )  $\delta$  110.6, 116.7, 120.6, 121.5, 126.2, 127.6, 127.6, 128.0, 128.2, 128.4, 128.6, 129.3, 130.1, 131.1, 131.2, 134.4, 137.6, 137.7, 138.3. EI-MS  $m/z$  (%): 379 ( $\text{M}^+$ , 100), 344 (10), 302 (48). Anal. Calcd. for  $\text{C}_{26}\text{H}_{18}\text{ClN}$ : C, 82.20; H, 4.78; N, 3.69; Found: C, 82.51; H, 4.89; N, 3.89.

### 6-Chloro-2, 3-diphenyl-1-(*p*-tolyl)-1*H*-indole (5)

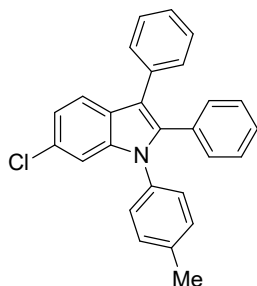

white solid; Yield: 77% (61 mg); mp: 169-171 °C;  $R_f = 0.7$ , on silica gel (Hexane/EtOAc 98:2);  $^1\text{H NMR}$  (500 MHz,  $\text{CDCl}_3$ )  $\delta$  2.40 (s, 3H), 7.10-7.12 (m, 4H), 7.16-7.21 (m, 6H), 7.28-7.30 (m, 2H), 7.34-7.36 (m, 4H), 7.70-7.72 (d,  $J = 8.52$  Hz, 1H).  $^{13}\text{C NMR}$  (125 MHz,  $\text{CDCl}_3$ )  $\delta$  21.1, 110.6, 116.4, 120.5, 121.3, 126.0, 126.1, 127.5, 127.9, 127.9, 128.3, 128.4, 129.9, 130.1, 131.1, 131.2, 134.5, 134.9, 137.4, 137.7, 138.4. EI-MS  $m/z$  (%): 393 ( $\text{M}^+$ , 100), 316 (33), 239 (47), 148 (56). Anal. Calcd for  $\text{C}_{27}\text{H}_{20}\text{ClN}$ : C, 82.33; H, 5.12; N, 3.56; Found: C, 82.03; H, 5.02; N, 3.32.

### 6-Chloro-1-(4-methoxyphenyl)-2, 3-diphenyl-1*H*-indole (6)

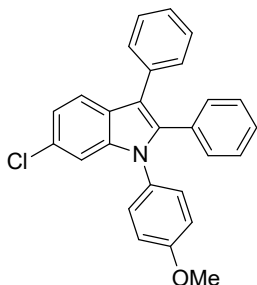

White solid; Yield: 79% (65 mg); mp: 153-155 °C;  $R_f = 0.40$  on silica gel (Hexane/EtOAc 98:2);  $^1\text{H NMR}$  (500 MHz,  $\text{CDCl}_3$ )  $\delta$  3.85 (s, 3H), 6.92-6.93 (m, 2H), 7.11-7.13 (m, 2H), 7.15-7.21 (m, 6H), 7.27-7.28 (m, 2H), 7.33-7.38 (m, 4H), 7.72 (d,  $J = 8.5$  Hz, 1H).  $^{13}\text{C NMR}$  (125 MHz,  $\text{CDCl}_3$ )  $\delta$  55.5, 110.6, 114.5, 116.3, 120.5, 121.3, 126.0, 126.1, 127.5, 128.0, 128.4, 128.4, 129.3, 130.1, 130.3, 131.1, 131.3, 134.6, 137.9, 138.7, 158.8. EI-MS  $m/z$  (%): 409 ( $\text{M}^+$ , 100), 378 (12), 374 (20), 332 (48). Anal. Calcd for  $\text{C}_{27}\text{H}_{20}\text{ClNO}$ : C, 79.11; H, 4.92; N, 3.42; Found: C, 78.79; H, 4.80; N, 3.21.

### 6-Chloro-1-(3-nitrophenyl)-2, 3-diphenyl-1H-indole (7)

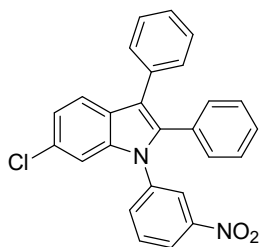

Yellow solid; Yield= 71% (59 mg); mp: 194-196 °C;  $R_f$  = 0.35 on silicagel (Hexane/EtOAc 95:5).  $^1\text{H}$  NMR (500 MHz,  $\text{CDCl}_3$ )  $\delta$  7.10 (d, ( $J$  = 7.6 Hz, 2H), 7.17-7.25 (m, 4H), 7.27-7.31 (m, 2H), 7.35-7.37 (m, 4H), 7.53-7.60 (m, 2H), 7.72 (d,  $J$  = 8.4 Hz, 1H), 8.13 (s, 1H), 8.21 (d,  $J$  = 7.6 Hz).  $^{13}\text{C}$  NMR (125 MHz,  $\text{CDCl}_3$ )  $\delta$  110.0, 118.0, 121.0, 122.2, 123.0, 126.5, 126.6, 128.1, 128.4, 128.6, 129.3, 130.0, 130.1, 130.4, 131.1, 131.4, 133.7, 134.0, 137.2, 138.0, 139.0, 147.8. EI-MS  $m/z$  (%): 424 ( $\text{M}^+$ , 100), 389 (53), 302 (62), 347 (73), 270 (13). Anal. Calcd for  $\text{C}_{26}\text{H}_{17}\text{ClN}_2\text{O}_2$ : C, 73.50; H, 4.03; N, 6.59; Found: C, 73.22; H, 3.90; N, 6.38.

### 6-Chloro-1-(4-ethylphenyl)-2, 3-diphenyl-1H-indole (8)

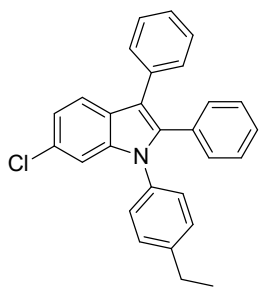

White solid; Yield: 73% (59 mg); mp: 176-178 °C;  $R_f$  = 0.75 on silica gel (Hexane/EtOAc 98:2);  $^1\text{H}$  NMR (500 MHz,  $\text{CDCl}_3$ )  $\delta$  1.30 (t,  $J$  = 7.5 Hz, 3H), 2.71 (q,  $J$  = 7.5 Hz, 2H), 7.11-7.24 (m, 10H), 7.26-7.29 (m, 1H), 7.32-7.38 (m, 5H), 7.72 (d,  $J$  = 8.4 Hz, 1H).  $^{13}\text{C}$  NMR (125 MHz,  $\text{CDCl}_3$ )  $\delta$  15.3, 28.5, 110.7, 116.5, 120.5, 121.4, 126.1, 126.2, 127.5, 127.9, 128.0, 128.4, 128.5, 128.7, 130.1, 131.1, 131.3, 134.5, 135.1, 137.8, 138.5, 143.7. EI-MS  $m/z$  (%): 407 ( $\text{M}^+$ , 100), 372 (32), 330 (27), 302 (53). Anal. Calcd for  $\text{C}_{28}\text{H}_{22}\text{ClN}$ : C, 82.44; H, 5.44; N, 3.43; Found: C, 82.14; H, 5.30; N, 3.21.

### 6-Chloro-2, 3-diphenyl-1-propyl-1H-indole (9)

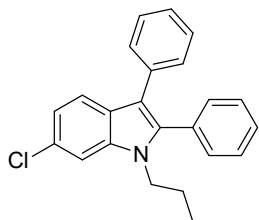

White solid; Yield: 59% (41 mg); mp: 130-132 °C;  $R_f$  = 0.65 on silica gel (Hexane/EtOAc 99:1);  $^1\text{H}$  NMR (500 MHz,  $\text{CDCl}_3$ )  $\delta$  0.80 (t,  $J$  = 7.3 Hz, 3H), 1.71 (sex,  $J$  = 7.5 Hz, 2H), 4.01 (t,  $J$  = 7.5 Hz, 2H), 7.13-7.22 (m, 3H), 7.27 (s, 3H), 7.31-7.33 (m, 2H), 7.39-7.42 (m, 4H), 7.69 (d,  $J$  = 8.4 Hz, 1H).  $^{13}\text{C}$  NMR (125 MHz,  $\text{CDCl}_3$ )  $\delta$  11.3, 23.2, 45.6, 109.9, 115.4, 120.6, 125.7, 125.8, 127.8, 128.2, 128.3, 128.5, 129.7, 131.1, 131.8, 134.7, 136.9, 138.2. EI-MS  $m/z$  (%): 345 ( $\text{M}^+$ , 100), 310 (12), 268 (55), 191 (31). Anal. Calcd for  $\text{C}_{23}\text{H}_{20}\text{ClN}$ : C, 79.87; H, 5.83; N, 4.05; Found: C, 80.17; H, 5.95; N, 4.26.

### 1-Butyl-6-chloro-2, 3-diphenyl-1H-indole (10)

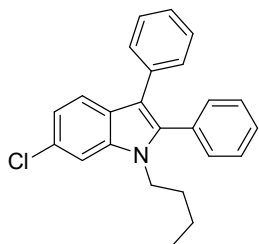

White solid; Yield: 62% (45 mg); mp: 76-78 °C;  $R_f$  = 0.55 on silica gel (Hexane/EtOAc 98:2);  $^1\text{H}$  NMR (500 MHz,  $\text{CDCl}_3$ )  $\delta$  0.80 (t,  $J$  = 7.4 Hz, 3H), 1.17-1.22 (m, 2H), 1.62-1.68 (m, 2H), 4.02-4.10 (m, 2H), 7.13 (d,  $J$  = 8.5 Hz, 1H), 7.17-7.19 (m, 1H), 7.21 (s, 1H), 7.25 (s, 2H), 7.30-7.33 (m, 3H), 7.38-7.41 (m, 4H), 7.68 (d,  $J$  = 8.4 Hz, 1H).  $^{13}\text{C}$  NMR (125 MHz,

CDCl<sub>3</sub>)  $\delta$  13.6, 20.0, 32.0, 43.8, 109.9, 119.4, 120.2, 120.6, 122.1, 125.7, 127.8, 128.2, 128.5, 129.7, 131.0, 131.1, 131.8, 134.7, 136.8, 138.1. EI-MS  $m/z$  (%): 359 (M<sup>+</sup>,100), 324 (15), 282 (42), 205 (50). Anal. Calcd for C<sub>24</sub>H<sub>22</sub>ClN: C, 80.10; H, 6.16; N, 3.89; Found: C, 79.79; H, 6.03; N, 3.69.

### 6-Chloro-1-hexyl-2, 3-diphenyl-1H-indole (11)

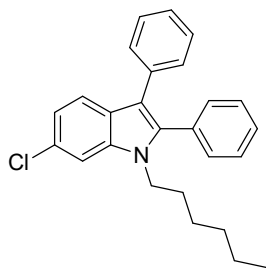

White solid; Yield: 71% (55 mg); mp: 105-107 °C; R<sub>f</sub> = 0.55 on silica gel (Hexane/EtOAc 98:2); <sup>1</sup>H NMR (500 MHz, CDCl<sub>3</sub>)  $\delta$  0.84 (t,  $J$  = 7.2 Hz, 3H), 1.16-1.23 (m, 6H), 1.65-1.71 (m, 2H), 4.01 (t,  $J$  = 7.7 Hz, 2H), 7.15-7.20 (m, 2H), 7.23 (s, 1H), 7.27 (d,  $J$  = 4.7 Hz, 3H), 7.32-7.35 (m, 2H), 7.40-7.43 (m, 4H), 7.71 (d,  $J$  = 8.5 Hz, 1H). <sup>13</sup>C NMR (125 MHz, CDCl<sub>3</sub>)  $\delta$  13.9, 22.4, 26.4, 29.8, 31.2, 44.0, 109.9, 115.3, 120.6, 122.1, 125.6, 125.7, 128.2, 128.3, 128.5, 127.7, 129.7, 131.1, 131.8, 134.7, 136.8, 138.1. EI-MS  $m/z$  (%): 325 (M<sup>+</sup>,100), 282 (80), 249 (10). Anal. Calcd for C<sub>26</sub>H<sub>26</sub>ClN: C, 88.50; H, 6.76; N, 3.61; Found: C, 88.82; H, 6.89; N, 3.88.

### 1-(4-Ethylphenyl)-6-methyl-2, 3-diphenyl-1H-indole (12)

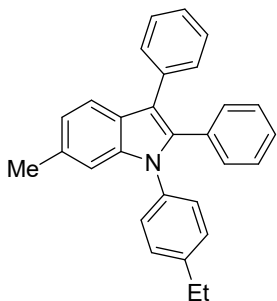

White solid; Yield: 80% (62 mg); mp: 126-128 °C; R<sub>f</sub> = 0.8, on silica gel (Hexane/EtOAc 98:2); <sup>1</sup>H NMR (500 MHz, CDCl<sub>3</sub>)  $\delta$  1.30-1.33 (t,  $J$  = 7.62 Hz, 3H), 2.49 (s, 3H), 2.71-2.75 (m, 2H), 7.08-7.10 (m, 1H), 7.12-7.14 (m, 2H), 7.16-7.18 (m, 7H), 7.22-7.24 (m, 2H), 7.26-7.28 (m, 1H), 7.31-7.35 (m, 2H), 7.41-7.43 (m, 1H), 7.72-7.74 (m, 1H). <sup>13</sup>C NMR (125 MHz, CDCl<sub>3</sub>)  $\delta$  15.3, 21.8, 28.4, 110.6, 116.3, 119.2, 122.5, 125.4, 125.8, 127.1, 127.8, 128.2, 128.4, 129, 130.2, 131.2, 131.9, 132.6, 135.2, 135.8, 136.5, 138.4, 143.1. EI-MS  $m/z$  (%): 387 (M<sup>+</sup>,100), 311 (44), 235 (51), 131 (68). Anal. Calcd for C<sub>29</sub>H<sub>25</sub>N: C, 89.88; H, 6.50; N, 3.61; Found: C, 90.18; H, 6.62; N, 3.84.

### 1-Benzyl-6-methyl-2, 3-diphenyl-1H-indole (13)

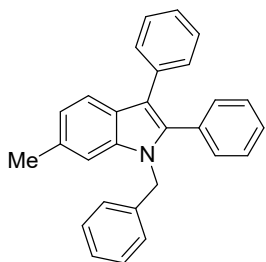

White solid; Yield: 80% (75 mg); mp: 135-137 °C; R<sub>f</sub> = 0.75 on silica gel (Hexane/EtOAc 99:1); <sup>1</sup>H NMR (500 MHz, CDCl<sub>3</sub>)  $\delta$  2.45 (s, 3H), 5.27 (s, 2H), 7.02-7.06 (m, 4H), 7.16-7.21 (m, 2H), 7.23-7.25 (m, 3H), 7.27-7.35 (m, 8H), 7.71 (d,  $J$  = 8.0 Hz, 1H). <sup>13</sup>C NMR (125 MHz, CDCl<sub>3</sub>)  $\delta$  21.9, 47.5, 110.3, 119.4, 122.2, 125.3, 125.5, 126.1, 127.1, 128.0, 128.1, 128.3, 128.6, 128.9, 129.8, 131.1, 131.9, 132.3, 135.3, 137.3, 137.4, 138.3. EI-MS  $m/z$  (%): 373 (M<sup>+</sup>,100), 358 (21), 282 (46), 219 (58). Anal. Calcd for C<sub>28</sub>H<sub>23</sub>N: C, 90.04; H, 6.21; N, 3.75; Found: C, 89.74; H, 6.10; N, 3.55.

### 1-Benzyl-2,3-diphenyl-6-(trifluoromethyl)-1H-indole (14)

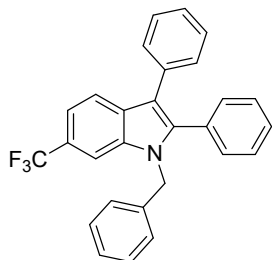

White solid; Yield: 82% (70 mg); mp: 132-134 °C;  $R_f = 0.45$  on silica gel (Hexane/EtOAc 90:10);  $^1\text{H NMR}$  (500 MHz,  $\text{CDCl}_3$ )  $\delta$  5.38 (s, 2H), 7.01-7.04 (m, 2H), 7.25-7.30 (m, 3H), 7.31-7.38 (m, 10H), 7.45 (d,  $J = 8.5$  Hz, 1H), 7.58 (s, 1H), 7.92 (d,  $J = 8.3$  Hz, 1H).  $^{13}\text{C NMR}$  (125 MHz,  $\text{CDCl}_3$ )  $\delta$  47.7, 107.9 (q,  $J = 3.8$  Hz), 116.1, 117.1 (q,  $J = 3.8$  Hz), 120.1, 124.2, 124.5, 126.0, 126.1, 127.5, 128.4, 128.5, 128.6, 128.8, 129.6, 129.9, 130.9, 131.1, 134.3, 135.9, 137.3, 140.5. EI-MS  $m/z$  (%): 426 ( $\text{M}^+$ , 100), 329 (52), 357 (43), 335 (48). Anal. Calcd for  $\text{C}_{28}\text{H}_{20}\text{F}_3\text{N}$ : C, 78.67; H, 4.72; N, 3.28; Found: C, 78.33; H, 4.60; N, 3.06.

### 1,2,3-Triphenyl-6-(trifluoromethyl)-1H-indole (15)

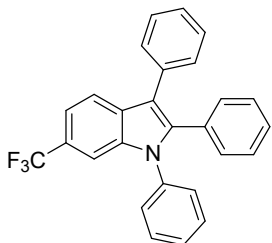

White solid; Yield: 77% (64 mg); mp: 168-170 °C;  $R_f = 0.45$  on silica gel (Hexane/EtOAc 90:10);  $^1\text{H NMR}$  (500 MHz,  $\text{CDCl}_3$ )  $\delta$  7.09-7.12 (m, 2H), 7.13-7.22 (m, 3H), 7.24-7.31 (m, 4H), 7.34-7.52 (m, 7H), 7.58 (s, 1H), 7.88 (d,  $J = 8.4$  Hz, 1H).  $^{13}\text{C NMR}$  (125 MHz,  $\text{CDCl}_3$ )  $\delta$  108.2, 110.9, 116.8, 117.4, 119.1, 120.0, 121.2, 123.0, 125.2, 126.3, 127.8 (q,  $J = 3.8$  Hz), 128.0, 128.2 (q,  $J = 3.7$  Hz), 128.4, 129.3, 130.1 (q,  $J = 3.8$  Hz), 131.1, 134.1, 136.9, 137.3, 139.6. EI-MS  $m/z$  (%): 413 ( $\text{M}^+$ , 100), 344 (50), 267 (28), 336 (42). Anal. Calcd for  $\text{C}_{27}\text{H}_{18}\text{F}_3\text{N}$ : C, 78.44; H, 4.39; N, 3.39; Found: C, 78.16; H, 4.28; N, 3.17.

### 1-(4-Chlorophenyl)-5-methyl-2,3-diphenyl-1H-indole (16)

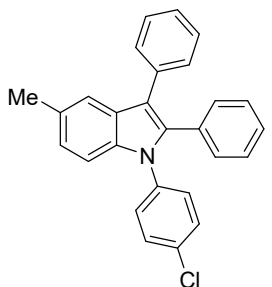

White solid; Yield: 63% (50 mg); mp: 157-159 °C;  $R_f = 0.4$  on silica gel (Hexane/EtOAc 97:3);  $^1\text{H NMR}$  (500 MHz,  $\text{CDCl}_3$ )  $\delta$  2.32 (s, 3H), 7.05-7.11 (m, 4H), 7.15-7.25 (m, 9H), 7.30 (d,  $J = 8.3$  Hz, 1H), 7.33-7.35 (m, 2H), 7.80 (d,  $J = 7$  Hz, 1H).  $^{13}\text{C NMR}$  (125 MHz,  $\text{CDCl}_3$ )  $\delta$  21.5, 110.4, 117.2, 119.8, 121.0, 122.9, 126.8, 127.3, 127.5, 127.7, 128.0, 128.2, 129.3, 129.4, 130.8, 131.1, 131.4, 132.8, 136.8, 137.7, 137.8. EI-MS  $m/z$  (%): 393 ( $\text{M}^+$ , 100), 316 (47), 282 (30), 239 (20). Anal. Calcd for  $\text{C}_{27}\text{H}_{20}\text{ClN}$ : C, 82.33; H, 5.12; N, 3.56; Found: C, 82.03; H, 5.03; N, 3.36.

### 4-Methyl-1-(naphthalen-2-yl)-2,3-diphenyl-1H-indole (17)

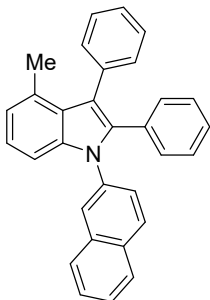

White solid; Yield: 48% (39 mg); mp: 198-200 °C;  $R_f = 0.65$  on silica gel (Hexane/EtOAc 98:2);  $^1\text{H NMR}$  (500 MHz,  $\text{CDCl}_3$ )  $\delta$  1.96 (s, 3H), 6.76-6.82 (m, 6H), 7.02-7.26 (m, 11H), 7.43 (t,  $J = 8.3$  Hz, 1H), 7.51-7.53 (m,

1H), 7.80-7.87 (m, 1H). <sup>13</sup>C NMR (125 MHz, CDCl<sub>3</sub>) δ 25.3, 110.2, 120.0, 122.6, 124.9, 125.1, 125.3, 125.3, 126.1, 126.2, 126.3, 126.4, 126.5, 126.7, 127.4, 127.8, 127.9, 128.9, 130.2, 130.3, 131.1, 131.2, 131.2, 131.3, 131.4, 131.9, 142.9. EI-MS *m/z* (%): 409 (M<sup>•+</sup>,100), 282 (52), 267 (40), 332 (25). Anal. Calcd for C<sub>31</sub>H<sub>23</sub>N: C, 90.92; H, 5.66; N, 3.42; Found: C, 91.22; H, 5.78; N, 3.64.

### 1-(4-Ethylphenyl)-4-methyl-2, 3-diphenyl-1H-indole (18)

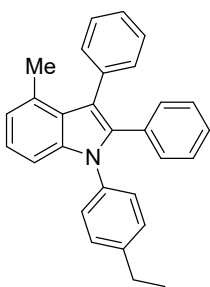

Yellow oil; Yield: 77% (60 mg); mp: 136-138 °C; R<sub>f</sub> = 0.7 on silica gel (Hexane/EtOAc 98:2); <sup>1</sup>H NMR (500 MHz, CDCl<sub>3</sub>) δ 1.32 (t, *J* = 7.5 Hz, 3H), 2.06 (s, 3H), 2.74 (q, *J* = 7.6 Hz, 2H), 7.05-7.06 (m, 2H), 7.10-7.14 (m, 3H), 7.19-7.29 (m, 9H), 7.40 (dd, *J* = 8.7, 7.2 Hz, 2H), 7.47 (d, *J* = 7.8 Hz, 1H). <sup>13</sup>C NMR (125 MHz, CDCl<sub>3</sub>) δ 15.4, 20.3, 28.5, 110.7, 116.7, 119.9, 120.5, 122.5, 125.5, 126.9, 127.8, 128.0, 128.5, 130.1, 130.3, 132.0, 132.1, 134.4, 136.1, 137.2, 137.8, 138.0, 143.0. EI-MS *m/z* (%): 387 (M<sup>•+</sup>,100), 372 (27), 358 (22), 310 (52). Anal. Calcd for C<sub>29</sub>H<sub>25</sub>N: C, 89.88; H, 6.50; N, 3.61; Found: C, 90.18; H, 6.63; N, 3.81.

### 1-(4-Chlorophenyl)-4-methyl-2, 3-diphenyl-1H-indole (19)

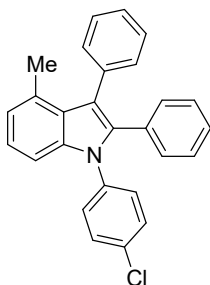

Yellow solid; Yield: 89% (70 mg); mp: 120-122 °C; R<sub>f</sub> = 0.45 on silica gel (Hexane/EtOAc 98:2); <sup>1</sup>H NMR (500 MHz, CDCl<sub>3</sub>) δ 2.05 (s, 3H), 7.03-7.05 (m, 2H), 7.13-7.17 (m, 3H), 7.20-7.24 (m, 3H), 7.27-7.30 (m, 3H), 7.35-7.41 (m, 5H), 7.47 (d, *J* = 7.8 Hz, 1H). <sup>13</sup>C NMR (125 MHz, CDCl<sub>3</sub>) δ 20.3, 110.3, 117.4, 120.2, 120.9, 122.9, 125.6, 127.1, 127.3, 128.0, 128.7, 129.3, 129.4, 130.2, 130.3, 131.7, 131.9, 132.7, 134.0, 137.0, 137.2, 137.7, 137.8. EI-MS *m/z* (%): 393 (M<sup>•+</sup>,100), 378 (15), 316 (12), 282 (20). Anal. Calcd for C<sub>27</sub>H<sub>20</sub>ClN: C, 82.33; H, 5.12; N, 3.56; Found: C, 82.03; H, 5.03; N, 3.36.

### 1-Benzyl-4-methyl-2, 3-diphenyl-1H-indole (20)

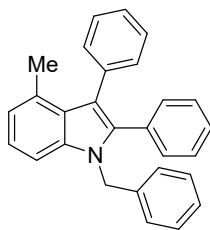

White solid; Yield: 69% (51 mg); mp: 123-125 °C; R<sub>f</sub> = 0.65 on silica gel (Hexane/EtOAc 99:1); <sup>1</sup>H NMR (500 MHz, CDCl<sub>3</sub>) δ 2.05 (s, 3H), 5.41 (s, 2H), 7.09 (d, *J* = 7.5 Hz, 1H), 7.15-7.26 (m, 9H), 7.28-7.34 (m, 6H), 7.45 (d, *J* = 7.8 Hz, 1H). <sup>13</sup>C NMR (125 MHz, CDCl<sub>3</sub>) δ 20.3, 47.9, 110.5, 115.7, 120.1, 122.2, 125.4, 126.0, 126.8, 127.2, 127.8, 128.3, 128.4, 128.8, 129.9, 130.3, 132.0, 134.4, 137.0, 137.7, 138.2, 138.4. EI-MS *m/z* (%): 373 (M<sup>•+</sup>,100), 296 (47), 219 (40), 128 (20). Anal. Calcd for C<sub>28</sub>H<sub>23</sub>N: C, 90.04; H, 6.21; N, 3.75; Found: C, 89.74; H, 6.12; N, 3.55.



### 1-Hexyl-4-methyl-2, 3-diphenyl-1H-indole (21)

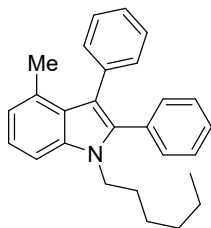

Orange oil; Yield: 91% (67 mg); mp: 107-109 °C;  $R_f$  = 0.75 on silica gel (Hexane/EtOAc 100:0);  $^1\text{H}$  NMR (500 MHz,  $\text{CDCl}_3$ )  $\delta$  0.83 (t,  $J$  = 7.1 Hz, 3H), 1.17-1.23 (m, 6H), 1.74 (t,  $J$  = 7.2 Hz, 2H), 2.02 (s, 3H), 4.18 (t,  $J$  = 7.8 Hz, 2H), 7.12-7.16 (m, 2H), 7.18-7.23 (m, 3H), 7.26-7.27 (m, 2H), 7.30-7.33 (m, 4H), 7.39 (d,  $J$  = 8.0 Hz, 1H), 7.46 (d,  $J$  = 8.2 Hz, 1H).  $^{13}\text{C}$  NMR (125 MHz,  $\text{CDCl}_3$ )  $\delta$  13.9, 20.3, 22.5, 26.5, 29.9, 31.2, 44.1, 107.7, 110.0, 115.3, 119.6, 120.1, 121.7, 125.2, 126.6, 127.6, 128.2, 129.8, 130.4, 131.1, 132.1, 132.5, 134.5, 136.4, 137.8. EI-MS  $m/z$  (%): 367 ( $\text{M}^+$ , 100), 352 (16), 290 (49), 282 (46). Anal. Calcd for  $\text{C}_{27}\text{H}_{29}\text{N}$ : C, 88.24; H, 7.95; N, 3.81; Found: C, 87.94; H, 7.86; N, 3.61.

### 1-(2-Ethylphenyl)-4-fluoro-2, 3-diphenyl-1H-indole (22)

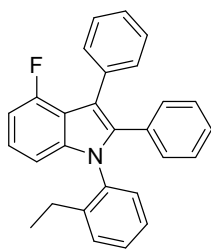

white solid; Yield: 61% (48 mg); mp 153-154 °C;  $R_f$  = 0.50 on silica gel (Hexane/EtOAc 100:0);  $^1\text{H}$  NMR (500 MHz,  $\text{CDCl}_3$ )  $\delta$  0.95 (t,  $J$  = 7.6 Hz, 3H), 2.17-2.34 (m, 2H), 7.02-7.06 (m, 1H), 7.07-7.17 (m, 7H), 7.21-7.31 (m, 4H), 7.32-7.42 (m, 4H), 7.62-7.69 (m, 1H);  $^{13}\text{C}$  NMR (125 MHz,  $\text{CDCl}_3$ )  $\delta$  13.8, 23.4, 109.9, 110.9, 115.8 (d,  $J$  = 22.35 Hz), 119.7 (d,  $J$  = 2.34 Hz), 120.6, 122.5, 122.8 (d,  $J$  = 15.83 Hz), 123.9 (d,  $J$  = 3.40 Hz), 126.4, 127.4, 127.5, 127.7, 127.7, 128.2 (d,  $J$  = 8.04 Hz), 128.7, 129.0, 130.0, 130.3, 131.7, 133.0 (d,  $J$  = 3.8 Hz), 136.4, 138.3, 138.7, 142.6, 144.2, 160.5 (d,  $J$  = 245.01 Hz); EI-MS  $m/z$  (%): 391( $\text{M}^+$ , 100), 314 (51), 286 (50), 297 (33), 362 (15). Anal. Calcd for  $\text{C}_{28}\text{H}_{22}\text{FN}$ : C, 85.90; H, 5.66; N, 3.58; Found: C, 86.22; H, 5.80; N, 3.80.

### 4-Fluoro-1-(naphthalen-2-yl)-2, 3-diphenyl-1H-indole (23)

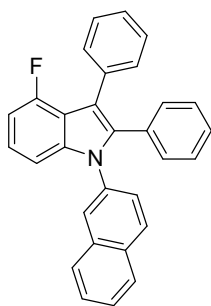

White solid; Yield: 55% (45 mg); mp 168-169 °C;  $R_f$  = 0.50 on silica gel (Hexane/EtOAc 100:0);  $^1\text{H}$  NMR (500 MHz,  $\text{CDCl}_3$ )  $\delta$  7.08-7.16 (m, 7H), 7.24-7.35 (m, 5H), 7.37-7.43 (m, 1H), 7.50-7.55 (m, 2H), 7.61-7.66 (m, 1H), 7.79-7.88 (m, 4H);  $^{13}\text{C}$  NMR (125 MHz,  $\text{CDCl}_3$ )  $\delta$  110.7, 110.9, 115.8 (d,  $J$  = 22.30 Hz), 119.8 (d,  $J$  = 2.31 Hz), 121.0, 122.5 (d,  $J$  = 15.63 Hz), 122.8, 123.9 (d,  $J$  = 3.52 Hz), 126.4 (d,  $J$  = 3.82 Hz), 126.4, 126.6, 127.4, 127.8, 127.9, 127.9, 128.3 (d,  $J$  = 7.9 Hz), 128.9, 130.5, 131.5, 132.1, 133.0 (d,  $J$  = 3.82 Hz), 133.4, 135.7, 138.0, 138.3, 160.6 (d,  $J$  = 245.58 Hz); EI-MS  $m/z$  (%): 413 ( $\text{M}^+$ , 100), 336 (48), 286 (51), 319 (19). Anal. Calcd for  $\text{C}_{30}\text{H}_{20}\text{FN}$ : C, 87.14; H, 4.88; N, 3.39; Found: C, 87.44; H, 5.03; N, 3.59.

#### 4-Chloro-1-(4-methoxyphenyl)-2,3-diphenyl-1H-indole (24)

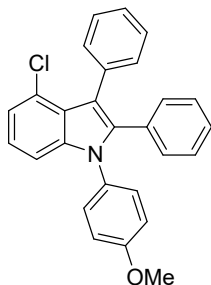

White solid; Yield: 61% (50 mg); mp: 104-106 °C;  $R_f = 0.5$ , on silica gel (Hexane/EtOAc 98:2);  $^1\text{H}$  NMR (500 MHz,  $\text{CDCl}_3$ )  $\delta$  3.88 (s, 3H), 6.97-6.98 (m, 2H), 7.23-7.26 (m, 7H), 7.32-7.34 (m, 2H), 7.39-7.44 (m, 3H), 7.50-7.52 (m, 2H), 7.93-7.95 (m, 1H).  $^{13}\text{C}$  NMR (125 MHz,  $\text{CDCl}_3$ )  $\delta$  55.4, 110.8, 114.3, 116.4, 119.6, 120.8, 122.7, 125.9, 127.4, 127.4, 128, 128.3, 129.5, 130.3, 131, 131.3, 131.8, 135.1, 137.4, 138.4, 158.5. EI-MS  $m/z$  (%): 409 ( $\text{M}^+$ , 100), 333 (40), 257(53), 151 (65). Anal. Calcd for  $\text{C}_{27}\text{H}_{20}\text{ClNO}$ : C, 79.11; H, 4.92; N, 3.42; Found: C, 78.80; H, 4.80; N, 3.21.

#### 4-Chloro-1-(4-ethylphenyl)-2,3-diphenyl-1H-indole (25)

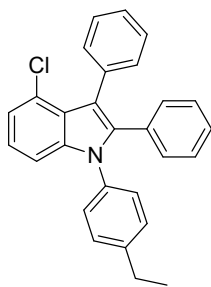

White solid; Yield: 70% (57 mg); mp: 128-130 °C;  $R_f = 0.8$ , on silica gel (Hexane/EtOAc 98:2);  $^1\text{H}$  NMR (500 MHz,  $\text{CDCl}_3$ )  $\delta$  1.27-1.30 (t,  $J = 7.65$  Hz, 3H), 2.68-2.72 (q,  $J = 7.65$  Hz, 2H), 7.11-7.19 (m, 6H), 7.22-7.27 (m, 5H), 7.33-7.36 (m, 3H), 7.39-7.41 (m, 2H), 7.82-7.83 (d,  $J = 7.00$  Hz, 1H).  $^{13}\text{C}$  NMR (125 MHz,  $\text{CDCl}_3$ )  $\delta$  15.3, 28.4, 110.7, 116.4, 119.5, 120.7, 122.6, 125.8, 127.2, 127.5, 127.8, 128.0, 128.2, 128.4, 130.2, 131.2, 131.7, 135.0, 135.6, 137.1, 138.0, 143.2. EI-MS  $m/z$  (%): 408 ( $\text{M}^+$ , 100), 332 (45), 256 (58), 153 (74). Anal. Calcd for  $\text{C}_{28}\text{H}_{22}\text{ClN}$ : C, 82.44; H, 5.44; N, 3.43; Found: C, 82.13; H, 5.30; N, 3.20.

#### 4-Chloro-1-(4-chlorophenyl)-2,3-diphenyl-1H-indole (26)

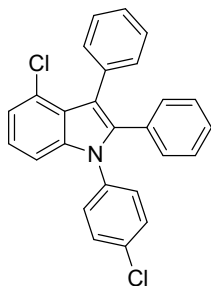

White solid; Yield: 72% (59 mg); mp: 110-112 °C;  $R_f = 0.7$ , on silica gel (Hexane/EtOAc 98:2);  $^1\text{H}$  NMR (500 MHz,  $\text{CDCl}_3$ )  $\delta$  7.10-7.12 (m, 2H), 7.16-7.21 (m, 4H), 7.30-7.34 (m, 3H), 7.36-7.41 (m, 7H), 7.83 (d,  $J = 6.25$  Hz, 1H).  $^{13}\text{C}$  NMR (125 MHz,  $\text{CDCl}_3$ )  $\delta$  110.4, 117.2, 119.7, 121.1, 123.0, 126.1, 127.5, 127.7, 128.1, 128.3, 129.3, 129.4, 130.2, 131.1, 131.3, 132.8, 134.6, 136.7, 136.8, 137.8. EI-MS  $m/z$  (%): 414 ( $\text{M}^+$ , 100), 338 (42), 262 (53), 152 (70). Anal. Calcd for  $\text{C}_{26}\text{H}_{17}\text{Cl}_2\text{N}$ : C, 75.37; H, 4.14; N, 3.38; Found: C, 75.68; H, 4.23; N, 3.60.

#### 4-Chloro-2,3-diphenyl-1-propyl-1H-indole (27)

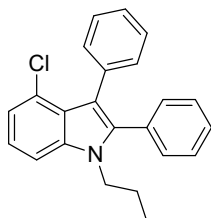

White solid; Yield: 65% (45 mg); mp: 117-119 °C;  $R_f = 0.65$  on silica gel (Hexane/EtOAc 97:3);  $^1\text{H}$  NMR (500 MHz,  $\text{CDCl}_3$ )  $\delta$  0.82 (t,  $J = 7.3$  Hz, 3H), 1.76 (sex,  $J = 7.4$  Hz, 2H), 4.09 (t,  $J = 7.5$  Hz, 2H), 7.18-7.24 (m, 2H), 7.28-7.31 (m, 2H), 7.33-7.35 (m, 3H), 7.37-7.38 (m, 2H), 7.41-7.42 (m, 2H), 7.47 (d,  $J = 8.2$  Hz, 1H), 7.85 (d,  $J = 7.9$  Hz, 1H).  $^{13}\text{C}$  NMR (125 MHz,  $\text{CDCl}_3$ )  $\delta$  11.4, 23.4, 45.5, 110.0, 115.3, 119.7, 120.1, 122.0, 125.4, 127.2, 128.0, 128.1,

128.4, 129.9, 131.2, 132.4, 135.3, 136.5, 137.6. EI-MS  $m/z$  (%): 345 ( $M^+$ , 100), 310 (15), 268 (49), 191 (32). Anal. Calcd for  $C_{23}H_{20}ClN$ : C, 79.87; H, 5.83; N, 4.05; Found: C, 80.17; H, 5.92; N, 4.25.

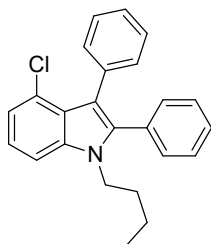

#### 1-Butyl-4-chloro-2,3-diphenyl-1H-indole (28)

White solid; Yield: 70% (50 mg); mp: 88-90 °C;  $R_f$  = 0.50 on silica gel (Hexane/EtOAc 98:2);  $^1H$  NMR (500 MHz,  $CDCl_3$ )  $\delta$  0.83 (t,  $J$  = 7.2 Hz, 3H), 1.24 (sex,  $J$  = 7.4 Hz, 2H), 1.71 (quin,  $J$  = 7.4 Hz, 2H), 4.13 (t,  $J$  = 7.6 Hz, 2H), 7.18-7.24 (m, 2H), 7.28-7.31 (m, 2H), 7.33-7.35 (m, 3H), 7.37-7.38 (m, 2H), 7.41-7.42 (m, 2H), 7.48 (d,  $J$  = 8.2 Hz, 1H), 7.86 (d,  $J$  = 7.9 Hz, 1H).  $^{13}C$  NMR (125 MHz,  $CDCl_3$ )  $\delta$  13.7, 20.1, 32.1, 43.7, 110.0, 115.3, 119.8, 120.1, 122.0, 125.4, 127.2, 128.1, 128.1, 128.4, 129.9, 131.2, 132.3, 135.3, 136.4, 137.6. EI-MS  $m/z$  (%): 359 ( $M^+$ , 100), 310 (15), 268 (53), 191 (29). Anal. Calcd for  $C_{24}H_{22}ClN$ : C, 80.10; H, 6.16; N, 3.89; Found: C, 79.80; H, 6.03; N, 3.69.

#### 4-Chloro-1-cyclohexyl-2,3-diphenyl-1H-indole (29)

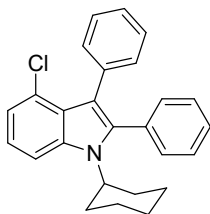

White solid; Yield: 55% (42 mg); mp: 186-188 °C;  $R_f$  = 0.65 on silica gel (Hexane/EtOAc 98:2);  $^1H$  NMR (500 MHz,  $CDCl_3$ )  $\delta$  1.23-1.33 (m, 3H), 1.71-1.73 (m, 1H), 1.88-1.97 (m, 4H), 2.37-2.42 (m, 1H), 4.09-4.14 (m, 1H), 6.88 (s, 1H), 7.12 (s, 1H), 7.15-7.18 (m, 2H), 7.24-7.26 (m, 2H), 7.31-7.33 (m, 2H), 7.39-7.41 (m, 3H), 7.72 (d,  $J$  = 8.4 Hz, 1H), 7.81 (d,  $J$  = 7.9 Hz, 1H).  $^{13}C$  NMR (125 MHz,  $CDCl_3$ )  $\delta$  25.5, 26.2, 31.5, 56.4, 113.5, 115.1, 119.6, 119.8, 121.3, 125.3, 128.0, 128.1, 128.3, 129.9, 131.1, 131.3, 132.8, 135.0, 135.3, 137.7. EI-MS  $m/z$  (%): 385 ( $M^+$ , 100), 304 (63), 350 (42), 226 (15). Anal. Calcd for  $C_{26}H_{24}ClN$ : C, 80.92; H, 6.27; N, 3.67; Found: C, 81.26; H, 6.38; N, 3.90.

#### 1,2,3-Triphenyl-1H-indole (30)

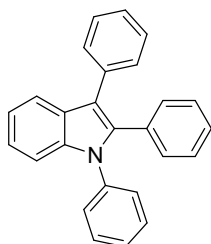

White solid; Yield: 79% (55 mg); mp 183-184 °C;  $R_f$  = 0.6, silica gel (Hexane/EtOAc 99:1);  $^1H$  NMR (500 MHz  $CDCl_3$ )  $\delta$  7.08-7.17 (m, 5H), 7.20-7.25 (m, 5H), 7.31-7.40 (m, 8H), 7.80-7.83 (m, 1H);  $^{13}C$  NMR (125 MHz,  $CDCl_3$ )  $\delta$  110.6, 116.7, 119.5, 120.8, 122.7, 125.9, 127.1, 127.3, 127.5, 127.8, 128.2, 128.2, 129.0, 130.2, 131.1, 131.6, 134.9, 137.0, 137.9, 138.1; EI-MS  $m/z$  (%) 345 ( $M^+$ , 100), 269 (22), 268 (55). Anal. Calcd for  $C_{26}H_{19}N$ : C, 90.40; H, 5.54; N, 4.05; Found: C, 90.70; H, 5.65; N, 4.26.

#### 1-(3,4-Dimethylphenyl)-2,3-diphenyl-1H-indole (31)

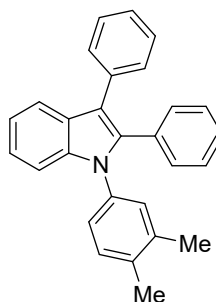

White solid; Yield: 66% (49 mg); mp: 153-155 °C;  $R_f$  = 0.8, on silica gel (Hexane/EtOAc 98:2);  $^1H$  NMR (500 MHz,  $CDCl_3$ )  $\delta$  2.27 (s, 3H), 2.31 (s, 3H), 6.93-6.96 (m, 1H), 7.10-7.20 (m, 7H), 7.21-7.29 (m, 3H), 7.35-7.44 (m,

5H), 7.84-7.86 (m, 1H).  $^{13}\text{C}$  NMR (125 MHz,  $\text{CDCl}_3$ )  $\delta$  19.5, 19.8, 110.8, 116.3, 119.5, 120.7, 122.5, 125.6, 125.8, 127.2, 127.4, 127.8, 128.2, 129.1, 130.1, 130.2, 131.2, 131.8, 135.1, 135.6, 135.7, 137.2, 137.4, 138.1. EI-MS  $m/z$  (%): 373 ( $\text{M}^+$ , 100), 297 (38), 221(52), 117 (60). Anal. Calcd for  $\text{C}_{28}\text{H}_{23}\text{N}$ : C, 90.04; H, 6.21; N, 3.75; Found: C, 89.74; H, 6.11; N, 3.52.

### 1-(2,3-Dimethylphenyl)-2, 3-diphenyl-1H-indole (32)

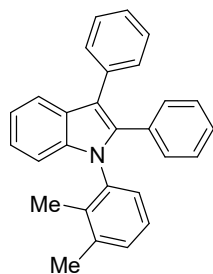

White solid; Yield: 77% (57 mg); mp: 142-144 °C;  $R_f$  = 0.7, on silica gel (Hexane/EtOAc 98;2);  $^1\text{H}$  NMR (500 MHz,  $\text{CDCl}_3$ )  $\delta$  1.81 (s, 3H), 2.28 (s, 3H), 6.99-7.01 (m, 1H), 7.11-7.18 (m, 7H), 7.19-7.28 (m, 4H), 7.33-7.37 (m, 2H), 7.42-7.44 (m, 2H), 7.84-7.87 (m, 1H).  $^{13}\text{C}$  NMR (125 MHz,  $\text{CDCl}_3$ )  $\delta$  14.3, 20.3, 111.0, 115.9, 119.5, 120.5, 122.4, 125.7, 125.8, 127.2, 127.2, 127.4, 127.7, 128.2, 129.7, 130.2, 130.8, 131.7, 135.2, 135.6, 136.9, 137.7, 138.1, 138.1. EI-MS  $m/z$  (%): 373 ( $\text{M}^+$ , 100), 297 (41), 221(48), 117 (62). Anal. Calcd for  $\text{C}_{28}\text{H}_{23}\text{N}$ : C, 90.04; H, 6.21; N, 3.75; Found: C, 90.34; H, 6.32; N, 3.97.

### 1-(4-Ethylphenyl)-2, 3-diphenyl-1H-indole (33)

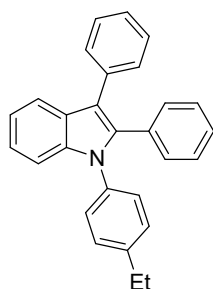

White solid; Yield: 83% (62 mg); mp:140-142 °C;  $R_f$  = 0.8, on silica gel (Hexane/EtOAc 98;2);  $^1\text{H}$  NMR (500 MHz,  $\text{CDCl}_3$ )  $\delta$  1.27-1.31 (t,  $J$  = 7.64 Hz, 3H), 2.67-2.73 (q,  $J$  = 7.64, 2H), 7.11-7.20 (m, 7H), 7.21-7.28 (m, 5H), 7.33-7.41 (m, 5H), 7.82-7.84 (d,  $J$  = 8.56 Hz, 1H).  $^{13}\text{C}$  NMR (125 MHz,  $\text{CDCl}_3$ )  $\delta$  15.3, 28.4, 110.8, 116.4, 119.5, 120.7, 122.6, 125.8, 127.2, 127.4, 127.8, 128.0, 128.2, 128.4, 130.2, 131.2, 131.7, 135.0, 135.6, 137.1, 138.0, 143.2. EI-MS  $m/z$  (%): 373.5 ( $\text{M}^+$ , 100), 296.5 (45), 219 (52), 114.5 (61). Anal. Calcd for  $\text{C}_{28}\text{H}_{23}\text{N}$ : C, 90.04; H, 6.21; N, 3.75; Found: C, 90.35; H, 6.33; N, 3.97.

### 1-Hexyl-2, 3-diphenyl-1H-indole (34)

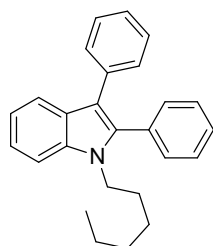

White solid; Yield: 78% (55 mg); mp: 102-104 °C;  $R_f$  = 0.75 on silica gel (Hexane/EtOAc 100:0);  $^1\text{H}$  NMR (500 MHz,  $\text{CDCl}_3$ )  $\delta$  0.83 (t,  $J$  = 6.5 Hz, 3H), 1.16-1.22 (m, 6H), 1.70 (qui,  $J$  = 7.4 Hz, 2H), 4.10 (t,  $J$  = 7.6 Hz, 2H), 7.16-7.23 (m, 3H), 7.28-7.29 (m, 2H), 7.32-7.33 (m, 3H), 7.35-7.37 (m, 2H), 7.40-7.41 (m, 2H), 7.45 (d,  $J$  = 8.2 Hz, 1H), 7.83 (d,  $J$  = 7.9 Hz, 1H).  $^{13}\text{C}$  NMR (125 MHz,  $\text{CDCl}_3$ )  $\delta$  13.9, 22.5, 26.5, 29.9, 31.2, 43.9, 110.0, 115.2, 119.7, 120.0, 122.0, 122.5, 125.4, 126.5, 127.6, 128.1, 128.4, 129.9, 131.2, 132.3, 135.3, 136.4, 137.6, 139.6. EI-MS  $m/z$  (%): 373 ( $\text{M}^+$ , 100), 353 (45), 276 (38), 199 (18). Anal. Calcd for  $\text{C}_{26}\text{H}_{27}\text{N}$ : C, 88.34; H, 7.70; N, 3.96; Found: C, 88.04; H, 7.61; N, 3.76.

### 6,13-Dimethyl-14-phenylindolo[1,2-f]phenanthridine (35)

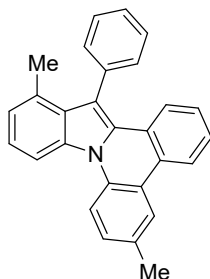

White solid; Yield: 69% (51 mg); mp: 159-161 °C;  $R_f = 0.40$  on silica gel (Hexane/EtOAc 98:2);  $^1\text{H NMR}$  (500 MHz,  $\text{CDCl}_3$ )  $\delta$  2.11 (s, 3H), 2.54 (s, 3H), 7.17 (t,  $J = 9.5$  Hz, 1H), 7.26-7.30 (m, 1H), 7.38-7.45 (m, 8H), 7.53 (d,  $J = 8.1$  Hz, 1H), 8.15 (s, 1H), 8.25 (d,  $J = 8.2$  Hz, 1H), 8.43 (d,  $J = 8.6$  Hz, 1H), 8.51 (d,  $J = 8.5$  Hz, 1H).  $^{13}\text{C NMR}$  (125 MHz,  $\text{CDCl}_3$ )  $\delta$  20.0, 21.2, 112.3, 113.9, 116.4, 119.9, 121.5, 122.2, 122.4, 124.2, 124.7, 126.4, 127.2, 127.3, 127.5, 127.8, 127.9, 129.6, 130.4, 130.9, 131.5, 132.4, 132.7, 133.9, 135.4, 138.4. EI-MS  $m/z$  (%): 371/ ( $\text{M}^+$ , 100), 357 (52), 294 (65). Anal. Calcd for  $\text{C}_{28}\text{H}_{21}\text{N}$ : C, 90.53; H, 5.70; N, 3.77; Found: C, 90.21; H, 5.56; N, 3.55.

### 11-Chloro-6-methyl-14-phenylindolo[1,2-f]phenanthridine (36)

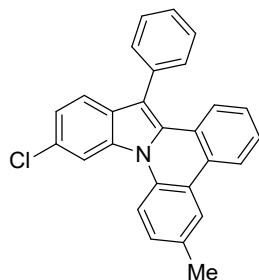

White solid; Yield: 72% (56 mg); mp: 192-194 °C;  $R_f = 0.35$  on silica gel (Hexane/EtOAc 98:2);  $^1\text{H NMR}$  (500 MHz,  $\text{CDCl}_3$ )  $\delta$  2.52 (s, 3H), 7.14-7.29 (m, 3H), 7.37-7.59 (m, 9H), 7.73 (d,  $J = 8.1$  Hz, 1H), 8.1-8.4 (m, 5H).  $^{13}\text{C NMR}$  (125 MHz,  $\text{CDCl}_3$ )  $\delta$  21.2, 113.4, 113.8, 116.2, 120.5, 122.1, 122.4, 124.3, 125.3, 126.5, 127.5, 127.6, 127.7, 127.8, 128.2, 129.2, 129.4, 129.6, 129.7, 129.8, 130.9, 132.5, 132.9, 134.7, 135.5. EI-MS  $m/z$  (%): 391 ( $\text{M}^+$ , 100), 314 (48), 377 (52), 355 (40). Anal. Calcd for  $\text{C}_{27}\text{H}_{18}\text{ClN}$ : C, 82.75; H, 4.63; N, 3.57; Found: C, 82.43; H, 4.50; N, 3.36.

### 2,3-Bis(4-chlorophenyl)-1-phenyl-1H-indole (37)

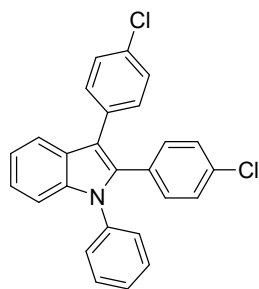

White solid; Yield: 59% (49 mg); mp: 159-161 °C;  $R_f = 0.40$  on silica gel (Hexane/EtOAc 98:2).  $^1\text{H NMR}$  (500 MHz,  $\text{CDCl}_3$ )  $\delta$  7.00 (d, 2H,  $J = 8.5$  Hz), 7.14 (d, 2H,  $J = 8.5$  Hz), 7.21-7.24 (m, 2H), 7.25-7.31 (m, 4H), 7.32-7.38 (m, 4H), 7.42 (t, 2H,  $J = 7.5$  Hz), 7.75 (d, 1H,  $J = 7.1$  Hz).  $^{13}\text{C NMR}$  (125 MHz,  $\text{CDCl}_3$ ):  $\delta$  110.8, 115.9, 119.3, 121.2, 123.2, 127.2, 127.5, 128.2, 128.4, 128.6, 129.3, 129.8, 131.3, 132.0, 132.2, 133.1, 133.6, 135.8, 137.7, 138.0. EI-MS  $m/z$  (%): 413 ( $\text{M}^+$ , 100), 336 (63), 302 (40), 337 (22). Anal. Calcd for  $\text{C}_{26}\text{H}_{17}\text{Cl}_2\text{N}$ : C, 75.37; H, 4.14; N, 3.38. Found: C, 75.68; H, 4.26; N, 3.60.

### 6-Chloro-1-(2-methoxyphenyl)-3-methyl-2-phenyl-1H-indole (38)

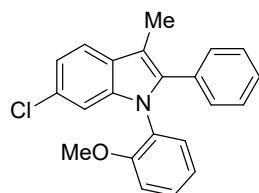

Pale yellow solid; Yield: 73% (51 mg); mp: 132-133 °C;  $R_f = 0.50$  on silica gel (Hexane/EtOAc 100:0);  $^1\text{H NMR}$  (500 MHz,  $\text{CDCl}_3$ )  $\delta$  2.41 (s, 3H), 3.55 (s, 3H), 6.92 (d,  $J = 8.3$  Hz, 1H), 6.97 (t,  $J = 7.5$ , 1H), 7.05-7.07 (m, 1H), 7.15 (d,  $J = 8.4$ , 1H), 7.19 (d,  $J = 7.7$  Hz, 1H), 7.22-7.29 (m, 5H), 7.30-7.35 (m, 1H), 7.56 (d,  $J = 8.3$  Hz, 1H);  $^{13}\text{C NMR}$  (125 MHz,  $\text{CDCl}_3$ )

$\delta$  9.5, 55.3, 109.6, 110.4, 112.1, 119.6, 120.2, 120.7, 126.7, 127.1, 127.6, 127.7, 127.9, 129.2, 129.8, 130.0, 132.0, 138.0, 138.4, 155.3; EI-MS  $m/z$  (%): 347 ( $M^+$ , 100), 332 (55), 237 (50), 312 (38), 316 (20), 240 (18). Anal. Calcd for  $C_{22}H_{18}ClNO$ : C, 75.97; H, 5.22; N, 4.03; Found: C, 76.24; H, 5.33; N, 4.27.

### 2, 3-Diphenyl-1H-indole (39)

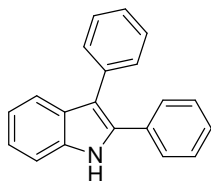

White solid; Yield: 71% (38 mg); mp: 121-123 °C;  $R_f$  = 0.35 on silica gel (Hexane/EtOAc 90:10);  $^1H$  NMR (500 MHz,  $CDCl_3$ )  $\delta$  7.20 (t,  $J$  = 7.4 Hz, 1H), 7.28-7.38 (m, 5H), 7.40-7.50 (m, 7H), 7.73 (d,  $J$  = 8.0 Hz, 1H), 8.25 (s, 1H).  $^{13}C$  NMR (125 MHz,  $CDCl_3$ )  $\delta$  110.9, 115.0, 119.7, 120.4, 122.7, 126.2, 127.8, 128.2, 128.5, 128.7, 128.8, 130.1, 132.7, 134.1, 135.1, 135.9. EI-MS  $m/z$  (%): 269 ( $M^+$ , 100), 194 (60), 117 (22). Anal. Calcd for  $C_{20}H_{17}N$ : C, 88.52; H, 6.31; N, 5.16; Found: C, 88.80; H, 6.42; N, 5.37.

### 4,6-Dichloro-2, 3-diphenyl-1H-indole (40)

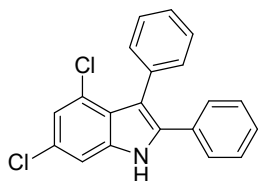

White solid; Yield: 56% (43 mg); mp: 111-113 °C;  $R_f$  = 0.40 on silica gel (Hexane/EtOAc 90:10);  $^1H$  NMR (500 MHz,  $CDCl_3$ )  $\delta$  7.11 (d,  $J$  = 8.5 Hz, 1H), 7.26-7.36 (m, 4H), 7.37-7.42 (m, 6H), 7.56 (d,  $J$  = 8.5 Hz, 1H), 8.35 (s, 1H).  $^{13}C$  NMR (125 MHz,  $CDCl_3$ )  $\delta$  110.8, 115.0, 120.5, 121.1, 126.5, 127.4, 127.9, 128.1, 128.3, 128.6, 128.7, 130.0, 132.2, 134.5, 134.6, 136.2. EI-MS  $m/z$  (%): 337 ( $M^+$ , 100), 302 (65), 267 (52), 260 (56). Anal. Calcd for  $C_{20}H_{13}Cl_2N$ : C, 71.02; H, 3.87; N, 4.14; Found: C, 70.71; H, 3.75; N, 3.91.

### 4-Chloro-2, 3-diphenyl-1H-indole (41)

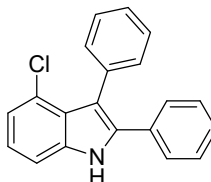

White solid; Yield: 63% (38 mg); mp: 118-120 °C;  $R_f$  = 0.40 on silica gel (Hexane/EtOAc 90:10);  $^1H$  NMR (500 MHz,  $CDCl_3$ )  $\delta$  7.17 (t,  $J$  = 9.7 Hz, 1H), 7.23-7.26 (m, 1H), 7.29-7.51 (m, 10H), 7.60-7.63 (m, 1H), 8.44 (s, 1H).  $^{13}C$  NMR (125 MHz,  $CDCl_3$ )  $\delta$  116.0, 116.5, 118.4, 121.3, 122.0, 126.7, 128.1, 128.4, 128.7, 128.9, 130.2, 130.3, 132.2, 133.3, 134.7, 134.9. EI-MS  $m/z$  (%): 303 ( $M^+$ , 100), 268 (43), 191 (26). Anal. Calcd for  $C_{20}H_{14}ClN$ : C, 79.07; H, 4.65; N, 4.61; Found: C, 79.42; H, 4.78; N, 4.83.

### 6-Methyl-2, 3-diphenyl-1H-indole (42)

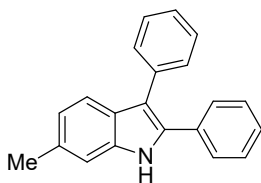

White solid; Yield: 73% (41 mg); mp: 102-104 °C;  $R_f$  = 0.35 on silica gel (Hexane/EtOAc 90:10);  $^1H$  NMR (500 MHz,  $CDCl_3$ )  $\delta$  2.45 (s, 3H), 7.08 (d,  $J$  = 8.2 Hz, 1H), 7.28-7.35 (m, 5H), 7.37-7.49 (m, 7H), 8.13 (s, 1H).  $^{13}C$  NMR (125 MHz,  $CDCl_3$ )  $\delta$  21.5, 110.5, 114.6, 119.2, 124.3, 126.1, 127.5, 128.1, 128.5, 128.6, 129.0, 129.7, 130.2, 132.8, 134.1, 134.2, 135.2. EI-MS  $m/z$  (%): 283 ( $M^+$ , 100), 268 (65), 117 (20). Anal. Calcd

for C<sub>21</sub>H<sub>17</sub>N: C, 89.01; H, 6.05; N, 4.94; Found: C, 89.34; H, 6.18; N, 5.15.

### 6-Fluoro-2, 3-diphenyl-1H-indole (43)

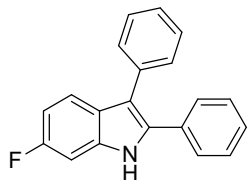

White solid; Yield: 54% (31 mg); mp: 108-110 °C; R<sub>f</sub> = 0.35 on silica gel (Hexane/EtOAc 90:10); <sup>1</sup>H NMR (500 MHz, CDCl<sub>3</sub>) δ 7.04 (t, *J* = 7.4 Hz, 1H), 7.32-7.38 (m, 5H), 7.39-7.49 (m, 7H), 8.18 (s, 1H). <sup>13</sup>C NMR (125 MHz, CDCl<sub>3</sub>) δ 104.5, 104.7, 111.0 (d, *J* = 8.7 Hz), 111.6 (d, *J* = 10.0 Hz), 115.2 (d, *J* = 5 Hz), 126.4, 128.0, 128.1, 128.7 (d, *J* = 10.0 Hz), 129.2 (d, *J* = 8.7 Hz), 129.9, 132.4 (d, *J* = 6.2 Hz), 134.6, 135.9, 157.6, 159.4. EI-MS *m/z* (%): 287 (M<sup>•+</sup>, 100), 268 (55), 191 (19). Anal. Calcd for C<sub>20</sub>H<sub>14</sub>FN: C, 83.60; H, 4.91; N, 4.87; Found: C, 83.28; H, 4.79; N, 4.66.

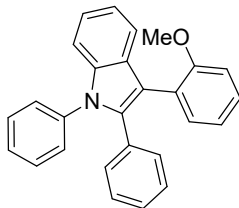

### 3-(2-Methoxyphenyl)-1, 2-diphenyl-1H-indole (44)

White solid; Yield: 56% (42 mg); mp: 176-178 °C; R<sub>f</sub> = 0.70 on silica gel (Hexane/EtOAc 95:5); <sup>1</sup>H NMR (500 MHz, CDCl<sub>3</sub>) δ 3.85 (s, 3H), 7.06-7.13 (m, 7H), 7.35-7.44 (m, 4H), 7.58-7.62 (m, 1H), 7.71-7.75 (m, 3H), 7.98 (d, *J* = 8.1 Hz, 1H), 8.34 (d, *J* = 8.1 Hz, 1H), 8.58 (d, *J* = 8.2 Hz, 1H). <sup>13</sup>C NMR (125 MHz, CDCl<sub>3</sub>) δ 54.8, 108.7, 110.6, 115.9, 120.1, 123.4, 123.5, 125.4, 125.7, 125.8, 126.0, 126.2, 126.3, 126.9, 127.5, 127.7, 128.2, 128.5, 129.0, 130.3, 133.0, 139.5, 142.8. EI-MS *m/z* (%): 375 (M<sup>•+</sup>, 100), 300 (42), 344 (30). Anal. Calcd for C<sub>27</sub>H<sub>21</sub>NO: C, 86.37; H, 5.64; N, 3.73; Found: C, 86.68; H, 5.73; N, 3.95.

### 3-(2-Methoxyphenyl)-1-(4-methoxyphenyl)-2-phenyl-1H-indole (45)

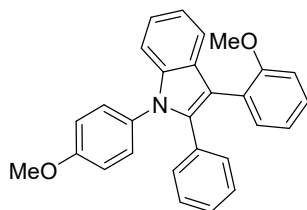

White solid; Yield: 67% (54 mg); mp: 186-188 °C; R<sub>f</sub> = 0.55 on silica gel (Hexane/EtOAc 95:5); <sup>1</sup>H NMR (500 MHz, CDCl<sub>3</sub>) δ 3.52 (s, 3H), 3.86 (s, 3H), 6.93-7.01 (m, 4H), 7.11-7.16 (m, 5H), 7.20-7.25 (m, 4H), 7.31-7.35 (m, 2H), 7.38 (d, *J* = 7.4 Hz, 1H), 7.62 (d, *J* = 7.6 Hz, 1H). <sup>13</sup>C NMR (125 MHz, CDCl<sub>3</sub>) δ 55.0, 55.4, 110.6, 111.2, 112.7, 114.3, 120.1, 120.4, 120.5, 122.3, 124.0, 126.9, 127.6, 127.9, 128.0, 129.4, 130.4, 131.3, 132.7, 132.8, 137.9, 138.2, 157.4, 158.4. EI-MS *m/z* (%): 405 (M<sup>•+</sup>, 100), 374 (50), 343 (45), 328 (12). Anal. Calcd for C<sub>28</sub>H<sub>23</sub>NO<sub>2</sub>: C, 82.94; H, 5.72; N, 3.45; Found: C, 83.24; H, 5.81; N, 3.68.

### 1-Hexyl-3-(2-methoxyphenyl)-2-phenyl-1H-indole (46)

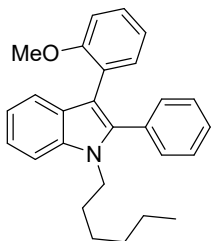

Yellow oil; Yield: 60% (46 mg); mp: 160-162 °C;  $R_f = 0.40$  on silica gel (Hexane/EtOAc 98:2);  $^1\text{H NMR}$  (500 MHz,  $\text{CDCl}_3$ )  $\delta$  0.85 (t,  $J = 6.0$  Hz, 3H), 1.19-1.26 (m, 6H), 1.73-1.79 (m, 2H), 3.49 (s, 3H), 4.14 (t,  $J = 7.6$  Hz, 2H), 6.86 (d,  $J = 8.2$  Hz, 1H), 6.92 (t,  $J = 7.4$  Hz, 1H), 7.15 (t,  $J = 7.4$  Hz, 1H), 7.23-7.29 (m, 4H), 7.31-7.35 (m, 4H), 7.44 (d,  $J = 8.2$  Hz, 1H), 7.55 (d,  $J = 7.9$  Hz, 1H).  $^{13}\text{C NMR}$  (125 MHz,  $\text{CDCl}_3$ )  $\delta$  14.0, 22.5, 26.6, 30.0, 31.3, 44.1, 54.9, 103.1, 109.9, 111.0, 111.5, 119.6, 120.3, 120.3, 121.6, 124.2, 127.5, 127.9, 128.0, 130.5, 132.7, 133.1, 136.5, 138.4, 157.2. EI-MS  $m/z$  (%): 383 ( $\text{M}^+$ , 100), 352 (54), 298 (42), 276 (15). Anal. Calcd for  $\text{C}_{27}\text{H}_{29}\text{NO}$ : C, 84.55; H, 7.62; N, 3.65; Found: C, 84.25; H, 7.53; N, 3.42.

### 1-Benzyl-4-methoxy-2,3-diphenyl-1H-indole (47)

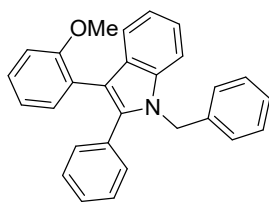

White solid; Yield: 80% (62 mg); 150-152 °C;  $R_f = 0.40$  on silica gel (Hexane/EtOAc 98:2);  $^1\text{H NMR}$  (500 MHz,  $\text{CDCl}_3$ )  $\delta$  3.55 (s, 3H), 5.40 (s, 2H), 6.92-6.99 (m, 2H), 7.14-7.21 (m, 5H), 7.22-7.25 (m, 4H), 7.28-7.36 (m, 6H), 7.63-7.64 (d,  $J = 7.64$  Hz, 1H).  $^{13}\text{C NMR}$  (125 MHz,  $\text{CDCl}_3$ )  $\delta$  47.9, 54.9, 110.5, 111.1, 112.0, 120.1, 120.3, 120.4, 122.0, 124.0, 126.2, 127.1, 127.7, 127.7, 128.1, 128.1, 128.7, 130.3, 132.5, 132.7, 137.0, 138.4, 138.8, 157.3. EI-MS  $m/z$  (%): 389.5 ( $\text{M}^+$ , 100), 312.5 (40), 235.5 (53), 144.5 (68). Anal. Calcd for  $\text{C}_{28}\text{H}_{23}\text{NO}$ : C, 86.34; H, 5.95; N, 3.60; Found: C, 86.64; H, 6.07; N, 3.83.

### 13-Methoxy-14-phenylindolo[1,2-f]phenanthridine (48)

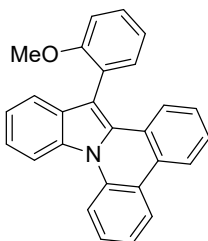

Yellow solid; Yield: 77% (57 mg); mp: 181-183 °C;  $R_f = 0.55$  on silica gel (Hexane/EtOAc 98:2);  $^1\text{H NMR}$  (500 MHz,  $\text{CDCl}_3$ )  $\delta$  3.69 (s, 3H), 7.14-7.21 (m, 3H), 7.31 (t,  $J = 7.0$  Hz, 1H), 7.35-7.44 (m, 3H), 7.47-7.53 (m, 3H), 7.60 (t,  $J = 7.4$  Hz, 1H), 7.74 (d,  $J = 8.2$  Hz, 1H), 8.24 (d,  $J = 8.1$  Hz, 1H), 8.35 (d,  $J = 8$  Hz, 1H), 8.44 (d,  $J = 8.5$  Hz, 1H), 8.61 (d,  $J = 8.4$  Hz, 1H).  $^{13}\text{C NMR}$  (125 MHz,  $\text{CDCl}_3$ )  $\delta$  55.6, 109.3, 111.6, 114.0, 116.6, 120.1, 121.2, 121.6, 122.2, 122.4, 123.0, 124.0, 124.0, 124.6, 125.2, 127.3, 127.4, 127.5, 127.6, 128.7, 129.1, 130.6, 131.3, 132.9, 136.1, 158.2. EI-MS  $m/z$  (%): 373 ( $\text{M}^+$ , 100), 342 (55), 373 (10), 296 (41). Anal. Calcd for  $\text{C}_{27}\text{H}_{19}\text{NO}$ : C, 86.84; H, 5.13; N, 3.75; Found: C, 87.14; H, 5.24; N, 3.98.

### 6-Methoxy-1-(4-methoxyphenyl)-2,3-diphenyl-1H-indole (49)

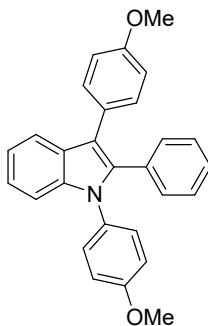

White solid; Yield: 73% (59 mg); mp: 208-210 °C;  $R_f = 0.35$  on silica gel (Hexane/EtOAc 98:2);  $^1\text{H NMR}$  (500 MHz,  $\text{CDCl}_3$ )  $\delta$  3.85 (s, 3H), 3.86 (s, 3H), 6.91-6.92 (m, 4H), 7.13-7.15 (m, 2H), 7.17-7.19 (m, 5H), 7.22-7.24 (m, 2H), 7.29-7.34 (m, 3H), 7.8 (s, 1H).  $^{13}\text{C NMR}$  (125 MHz,  $\text{CDCl}_3$ )  $\delta$  55.2, 55.4, 110.6, 113.8, 114.2, 115., 119.53, 120.6, 122.5, 127.1, 127.5, 127.9, 129.3, 130.1, 131, 131.1, 131.2, 131.8, 136.9, 138.2, 157.8, 158.4. EI-MS  $m/z$



(%): 405 (M<sup>+</sup>,100), 329 (43), 253(50), 147 (73). Anal. Calcd for C<sub>28</sub>H<sub>23</sub>NO<sub>2</sub>: Elemental Analysis: C, 82.94; H, 5.72; N, 3.45; Found: C, 83.28; H, 5.83; N, 3.67.

### 1-Butyl-6-methoxy-2,3-diphenyl-1H-indole (50)

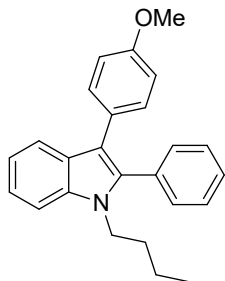

White solid; Yield: 60% (42 mg); mp: 93-35 °C; R<sub>f</sub> = 0.65 on silica gel (Hexane/EtOAc 98:2); <sup>1</sup>H NMR (500 MHz, CDCl<sub>3</sub>) δ 0.80-0.84 (t, *J* = 7.4 Hz, 3H), 1.17-1.25 (m, 2H), 1.64-1.72 (m, 2H), 3.95 (s, 3H), 4.03-4.07 (t, *J* = 7.6 Hz, 2H), 6.86-6.92 (m, 2H), 7.15-7.19 (m, 1H), 7.25-7.25 (m, 3H), 7.33-7.40 (m, 6H), 7.69-7.71 (d, *J* = 8.7 Hz, 1H). <sup>13</sup>C NMR (125 MHz, CDCl<sub>3</sub>) δ 13.6, 20.0, 31.87, 43.57, 55.94, 93.9, 109.3, 115.0, 120.4, 121.7, 125.3, 127.8, 128.1, 128.3, 129.7, 131.2, 132.4, 135.3, 136.5, 137.1, 156.44. EI-MS *m/z* (%): 355 (M<sup>+</sup>, 100), 278 (40), 201 (51), 144 (63). Anal. Calcd for C<sub>23</sub>H<sub>25</sub>NO: Elemental Analysis: C, 84.47; H, 7.09; N, 3.94; Found: C, 83.97; H, 6.97; N, 3.68.

### 1-Benzyl-3-(4-methoxyphenyl)-2-phenyl-1H-indole (51)

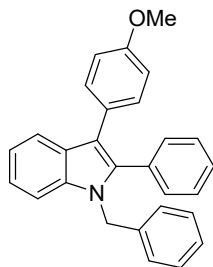

White solid; Yield: 79% (61 mg); mp: 174-175 °C; R<sub>f</sub> = 0.35 on silica gel (Hexane/EtOAc 97:3); <sup>1</sup>H NMR (500 MHz, CDCl<sub>3</sub>) δ 3.81 (s, 3H), 5.26 (s, 2H), 6.75 (s, 1H), 6.89 (d, *J* = 8.6 Hz, 1H), 7.06 (d, *J* = 7.9 Hz, 2H), 7.17-7.22 (m, 1H), 7.25-7.32 (m, 10H), 7.35 (d, *J* = 7.0 Hz, 2H), 7.72 (d, *J* = 8.6 Hz, 1H). <sup>13</sup>C NMR (125 MHz, CDCl<sub>3</sub>) δ 47.6, 55.7, 94.3, 109.9, 115.5, 120.4, 121.8, 125.5, 126.1, 127.1, 127.9, 128.1, 128.3, 128.7, 129.8, 131.1, 131.9, 135.2, 136.8, 137.8, 138.0, 156.6. EI-MS *m/z* (%): 389 (M<sup>+</sup>, 100), 312 (47), 298 (42), 283 (26), 358 (17). Anal. Calcd for C<sub>28</sub>H<sub>23</sub>NO: Elemental Analysis: C, 86.34; H, 5.95; N, 3.60; Found: C, 86.55; H, 6.09; N, 3.80.

# 5 Copies of $^1\text{H}$ and $^{13}\text{C}$ NMR Spectra

$^1\text{H}$  NMR of compound 4 ( $\text{CDCl}_3$ , 500 MHz)

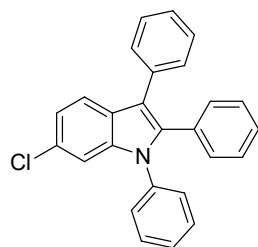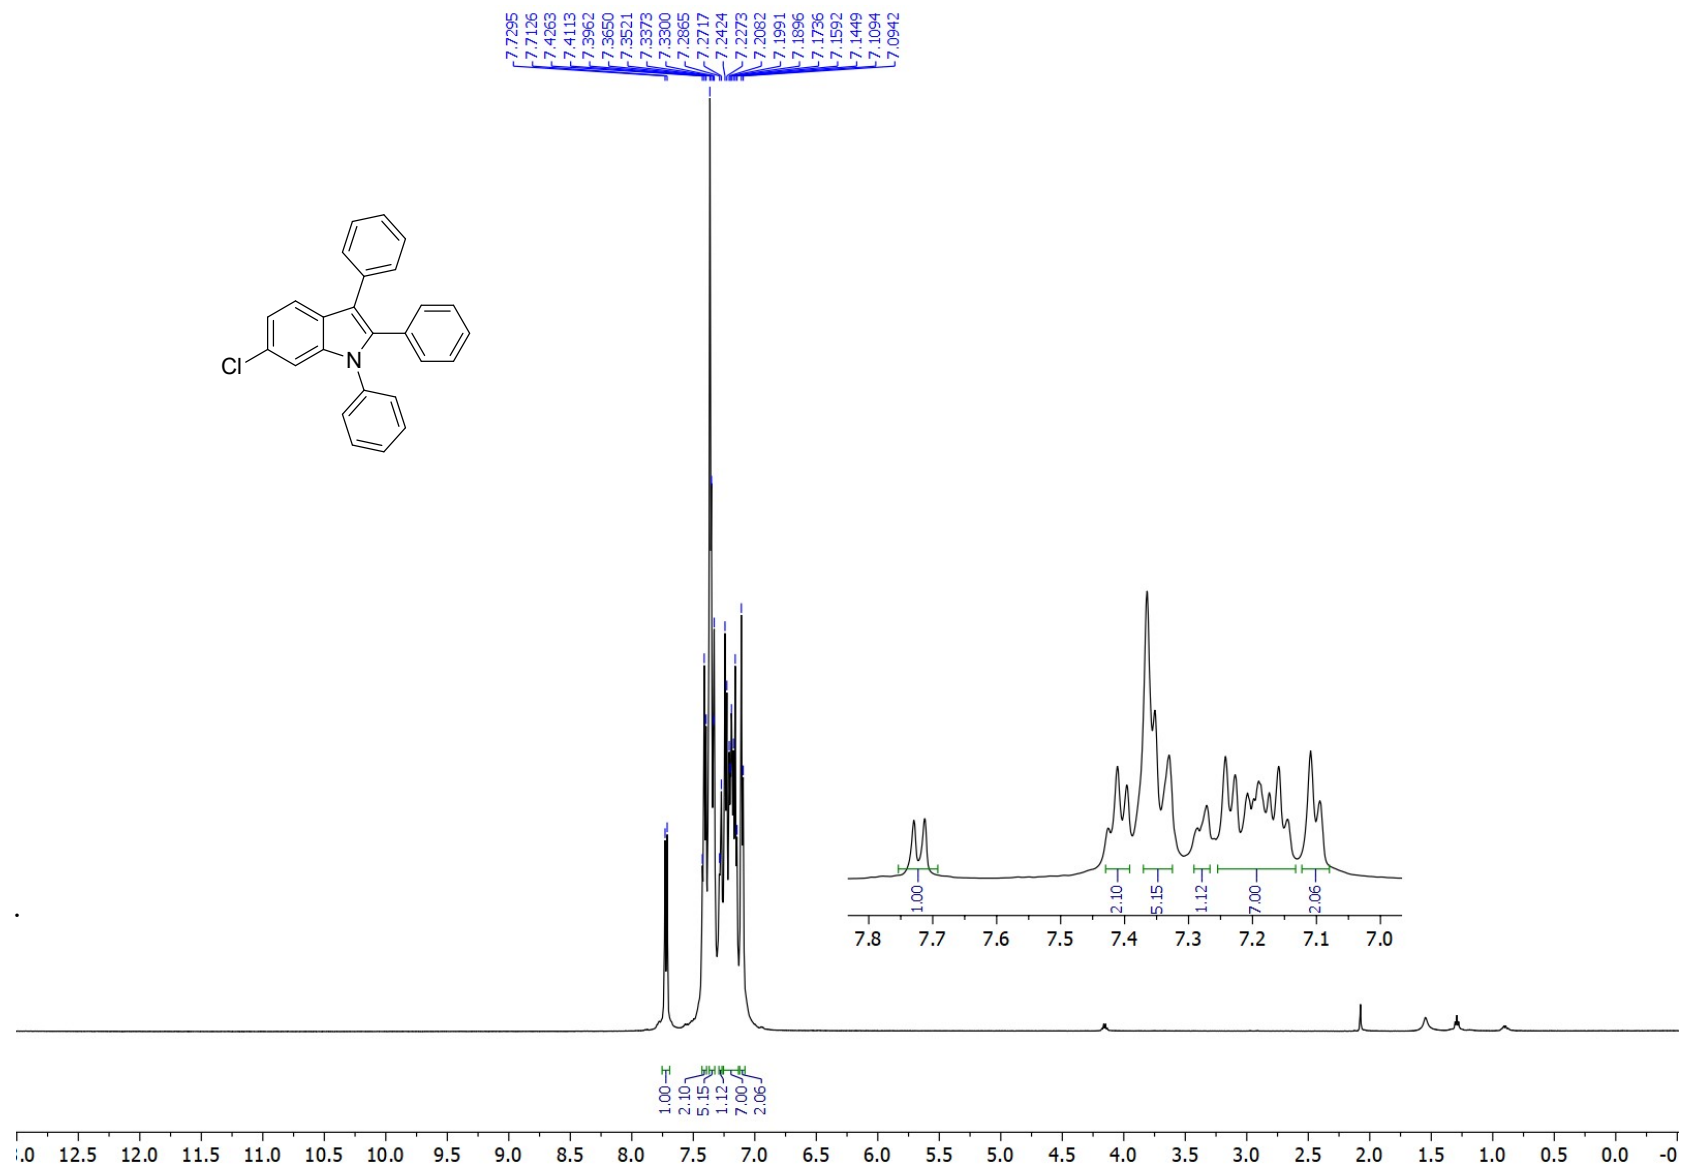

$^{13}\text{C}$  NMR of compound **4** ( $\text{CDCl}_3$ , 125 MHz)

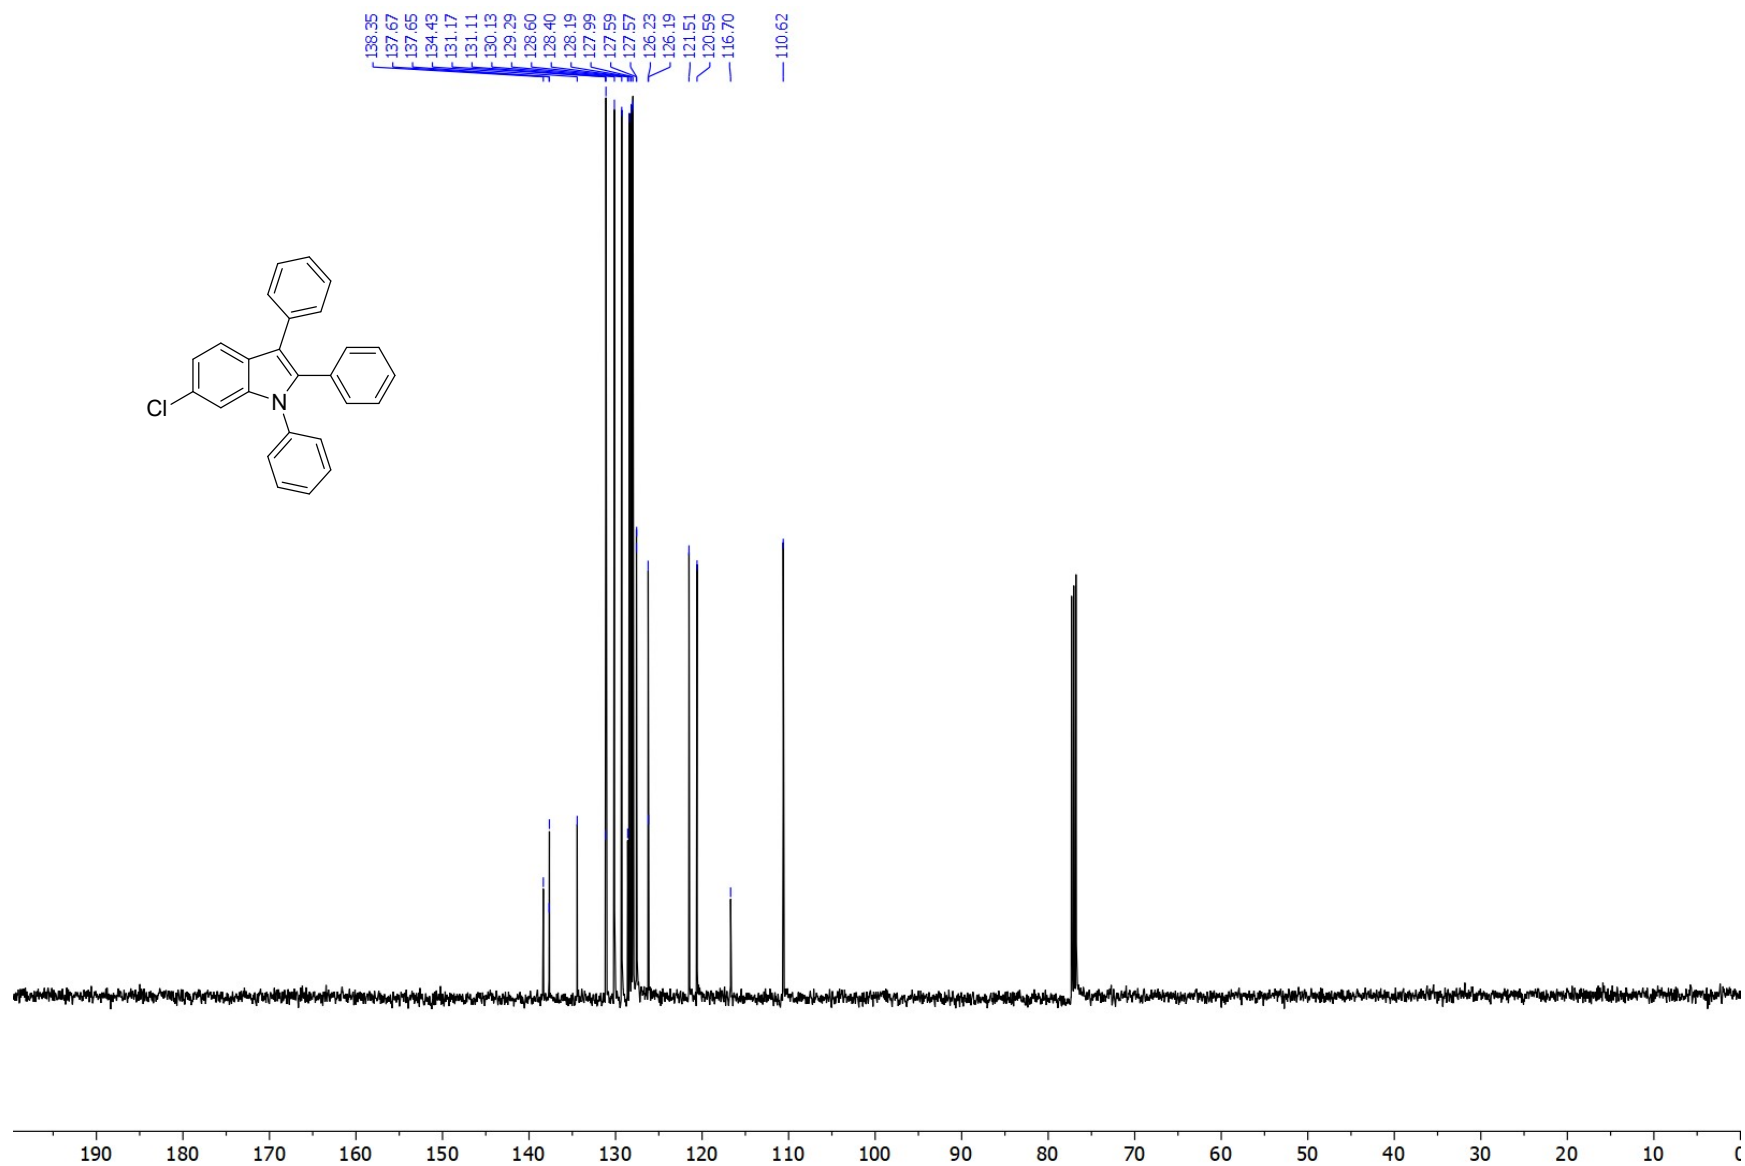

<sup>1</sup>H NMR of compound **5** (CDCl<sub>3</sub>, 500 MHz)

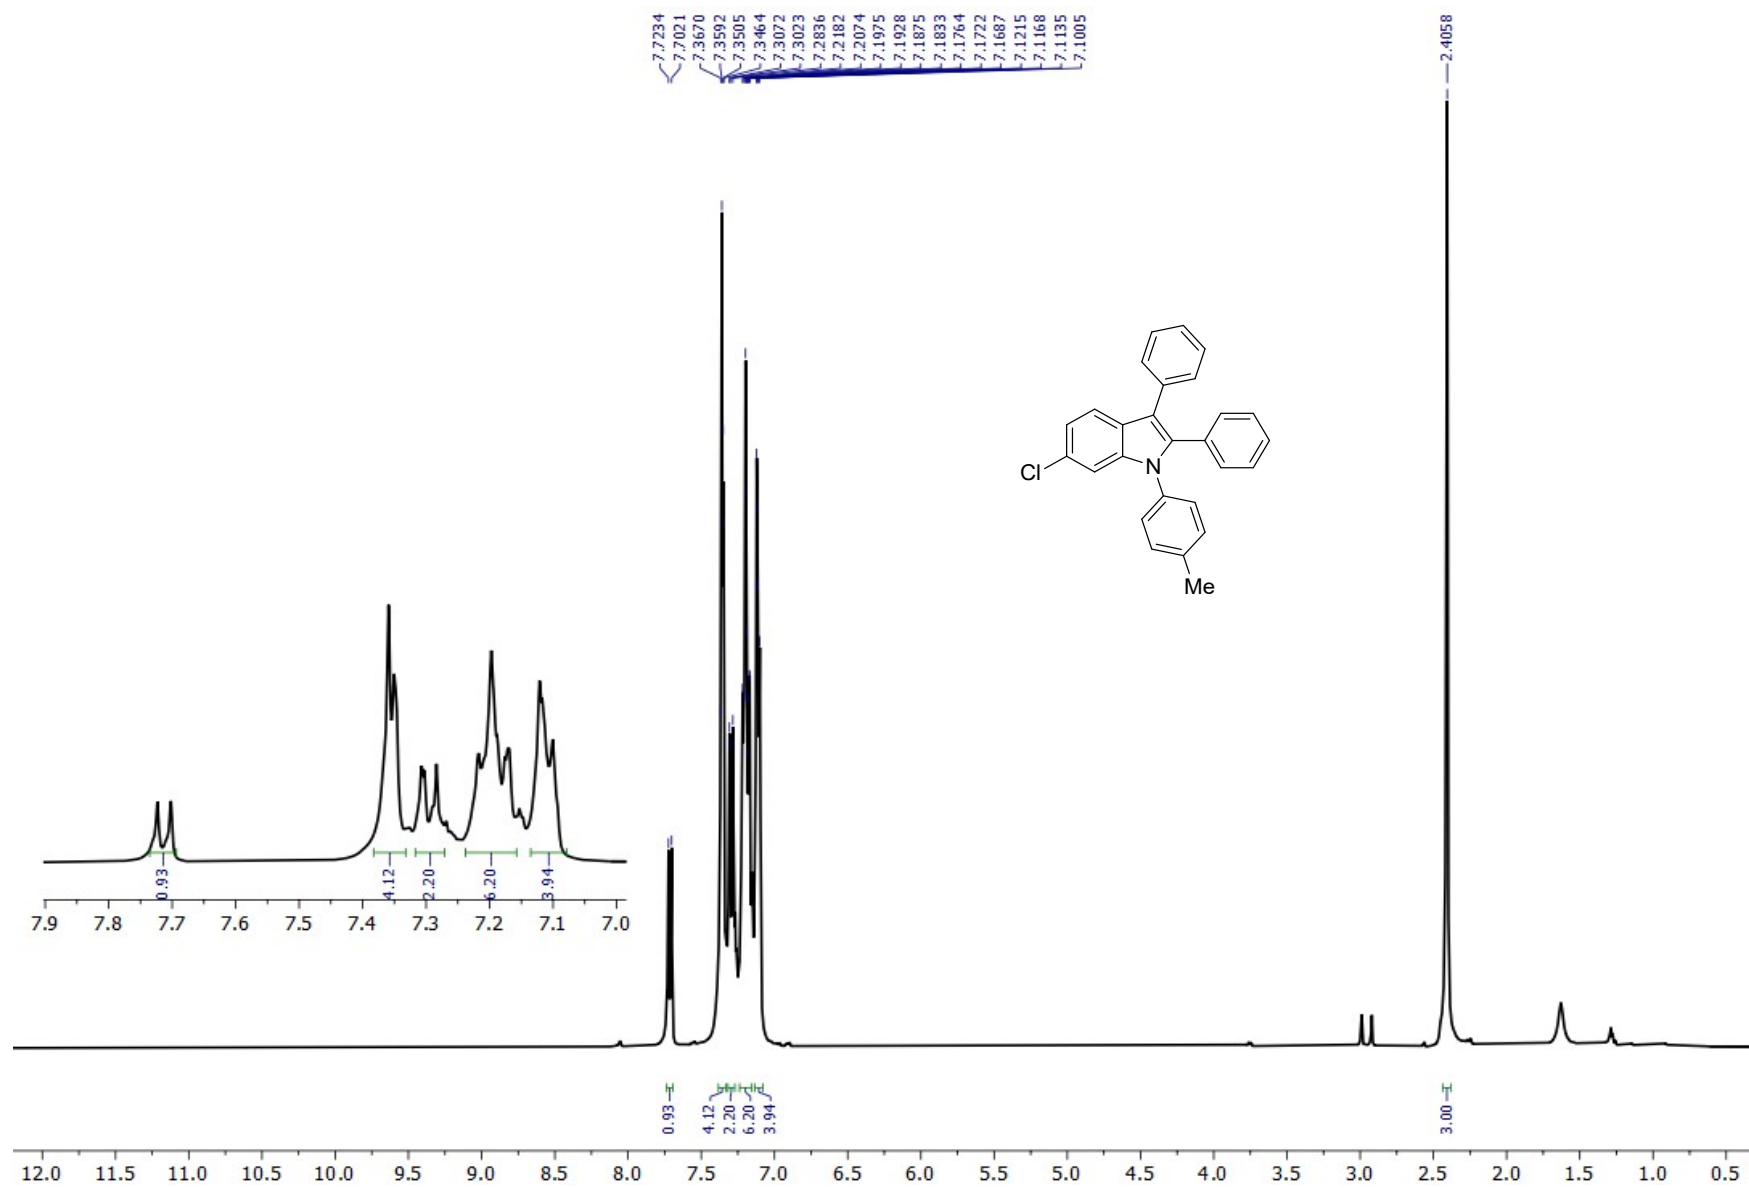

$^{13}\text{C}$  NMR of compound **5** ( $\text{CDCl}_3$ , 125 MHz)

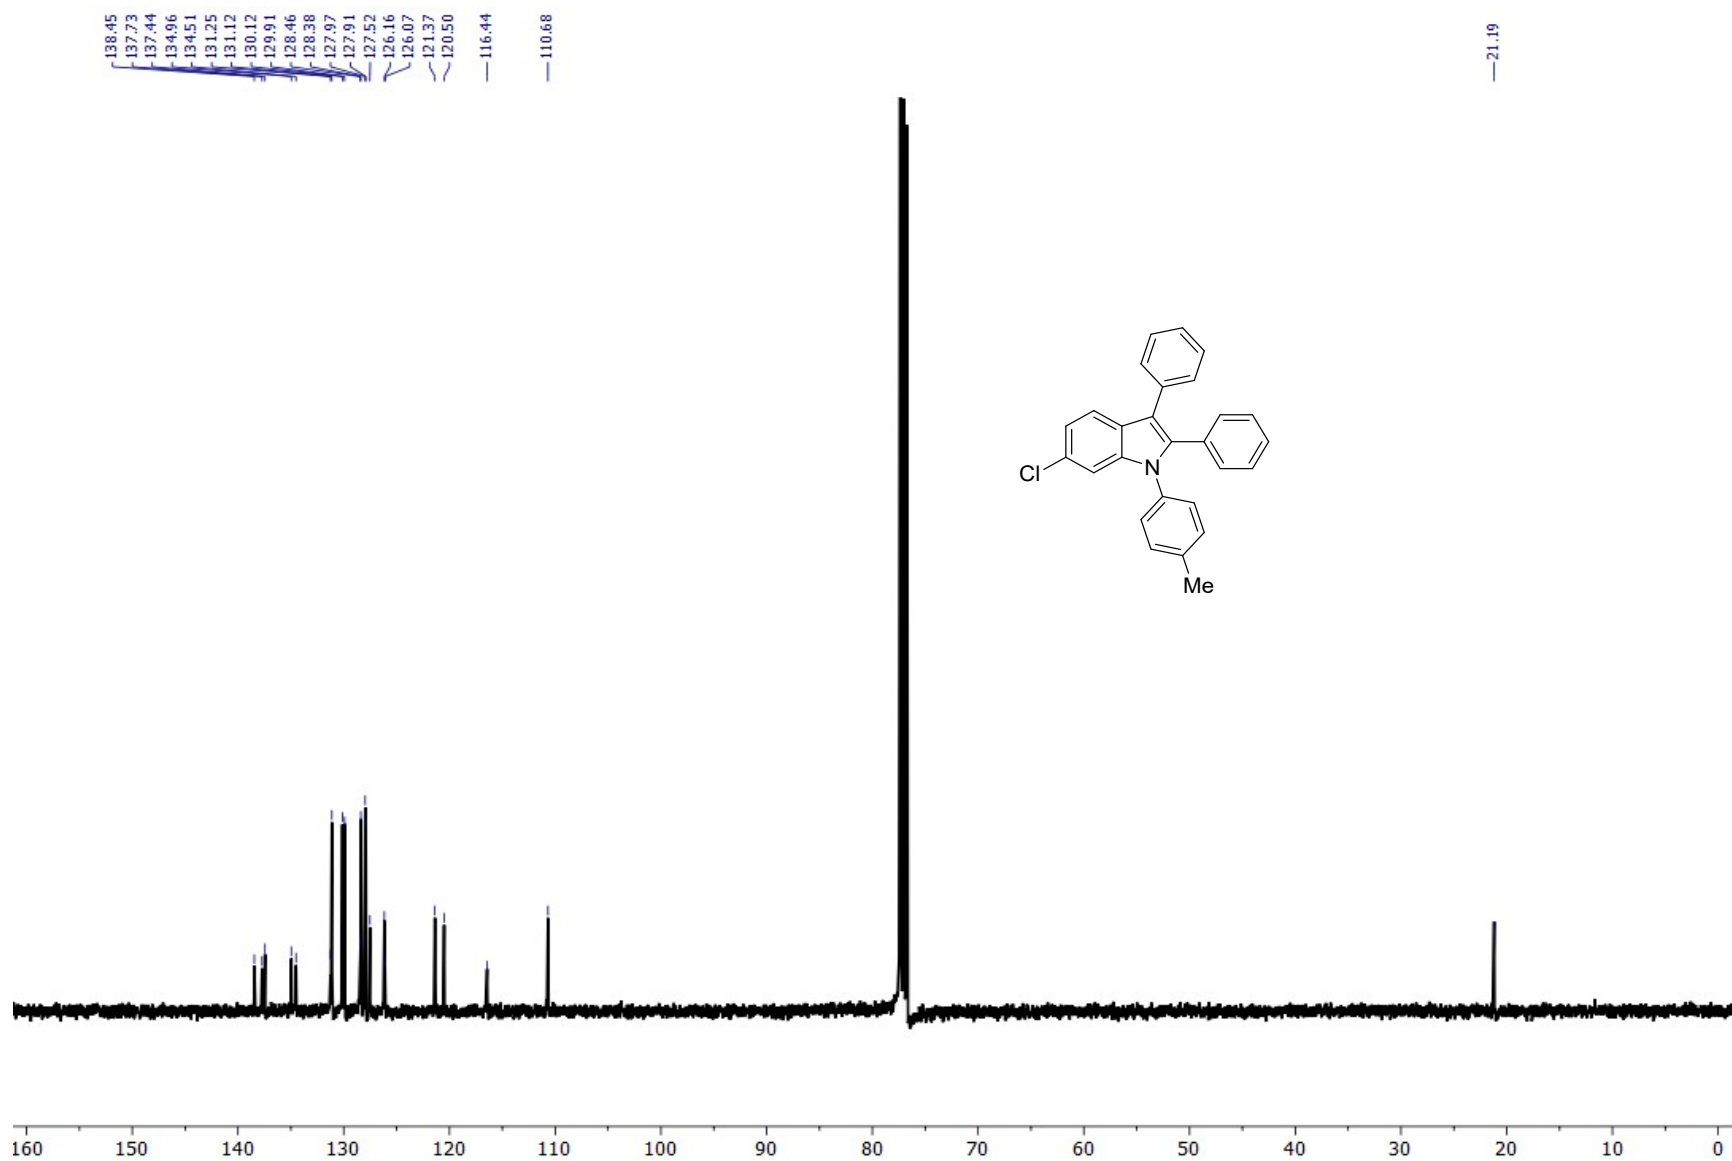

<sup>1</sup>H NMR of compound **6** (CDCl<sub>3</sub>, 500 MHz)

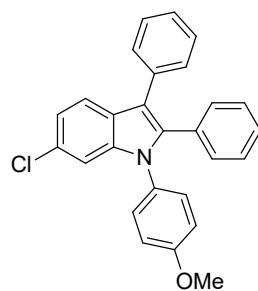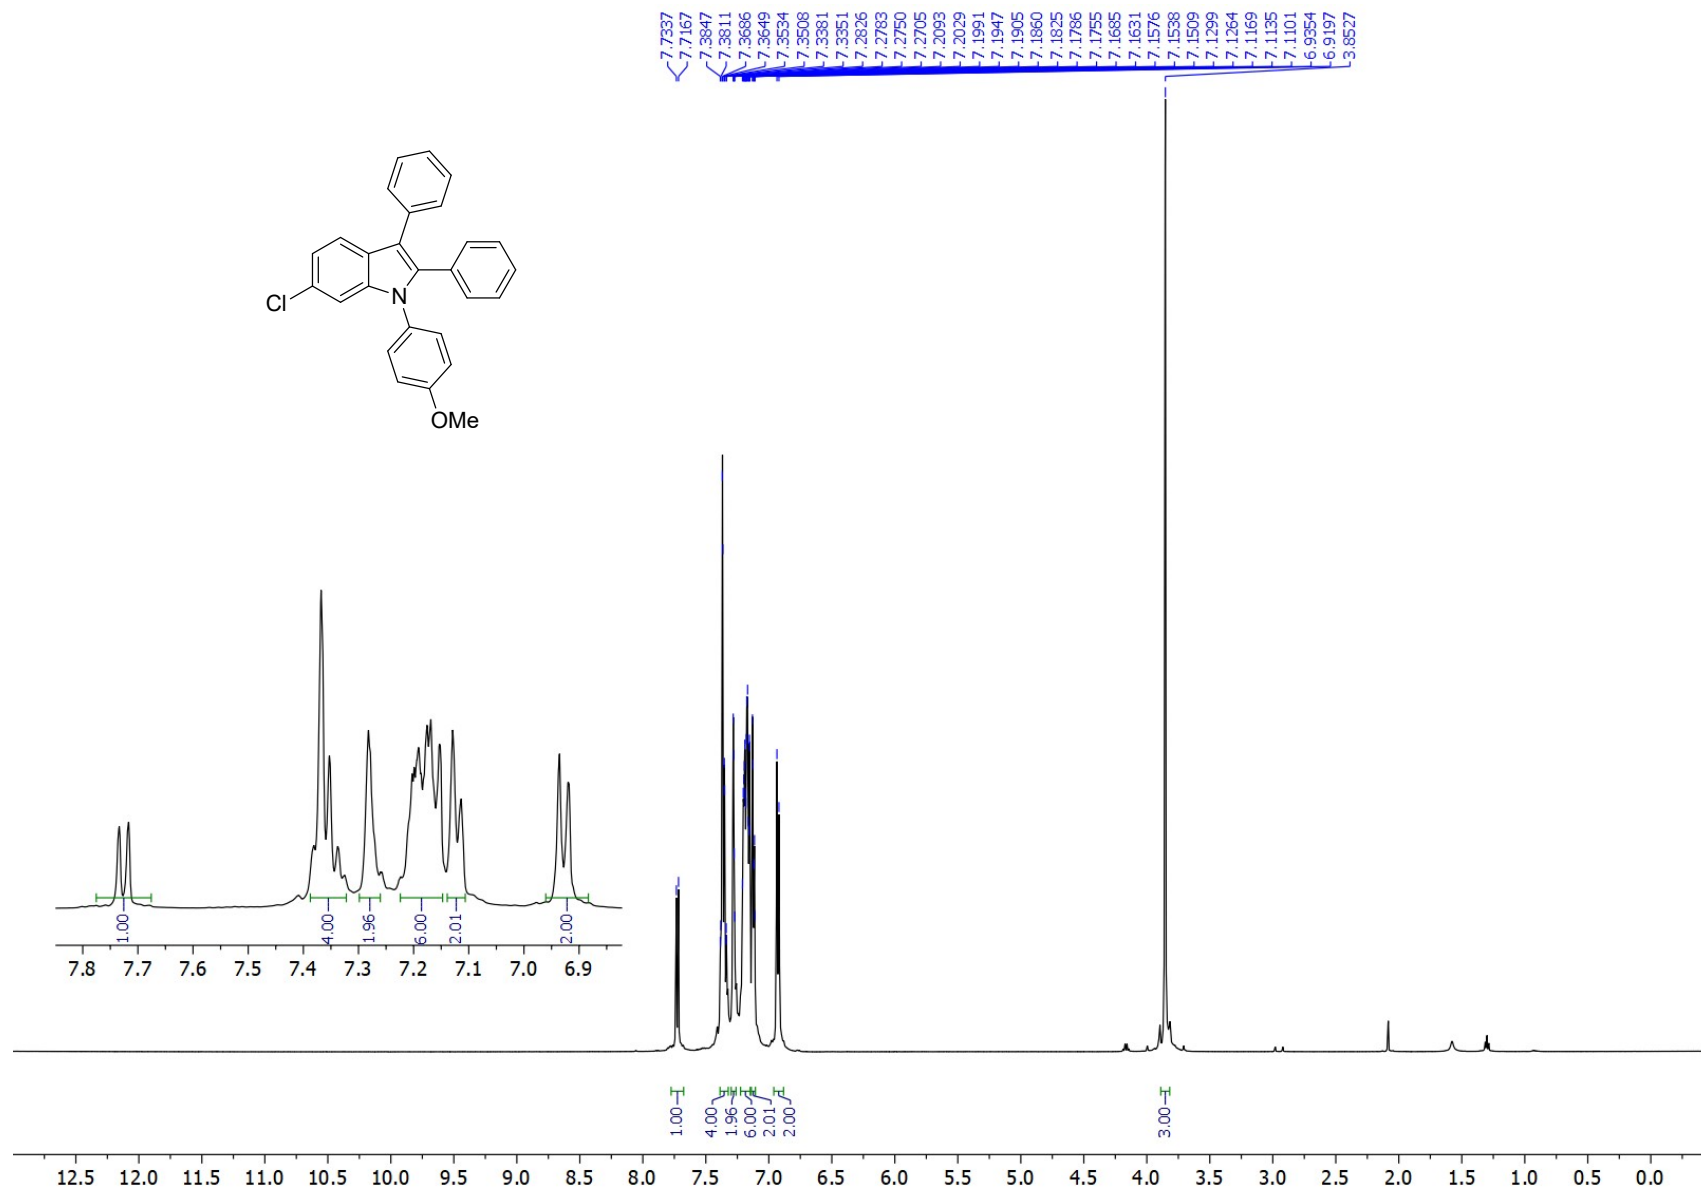

$^{13}\text{C}$  NMR of compound **6** ( $\text{CDCl}_3$ , 125 MHz)

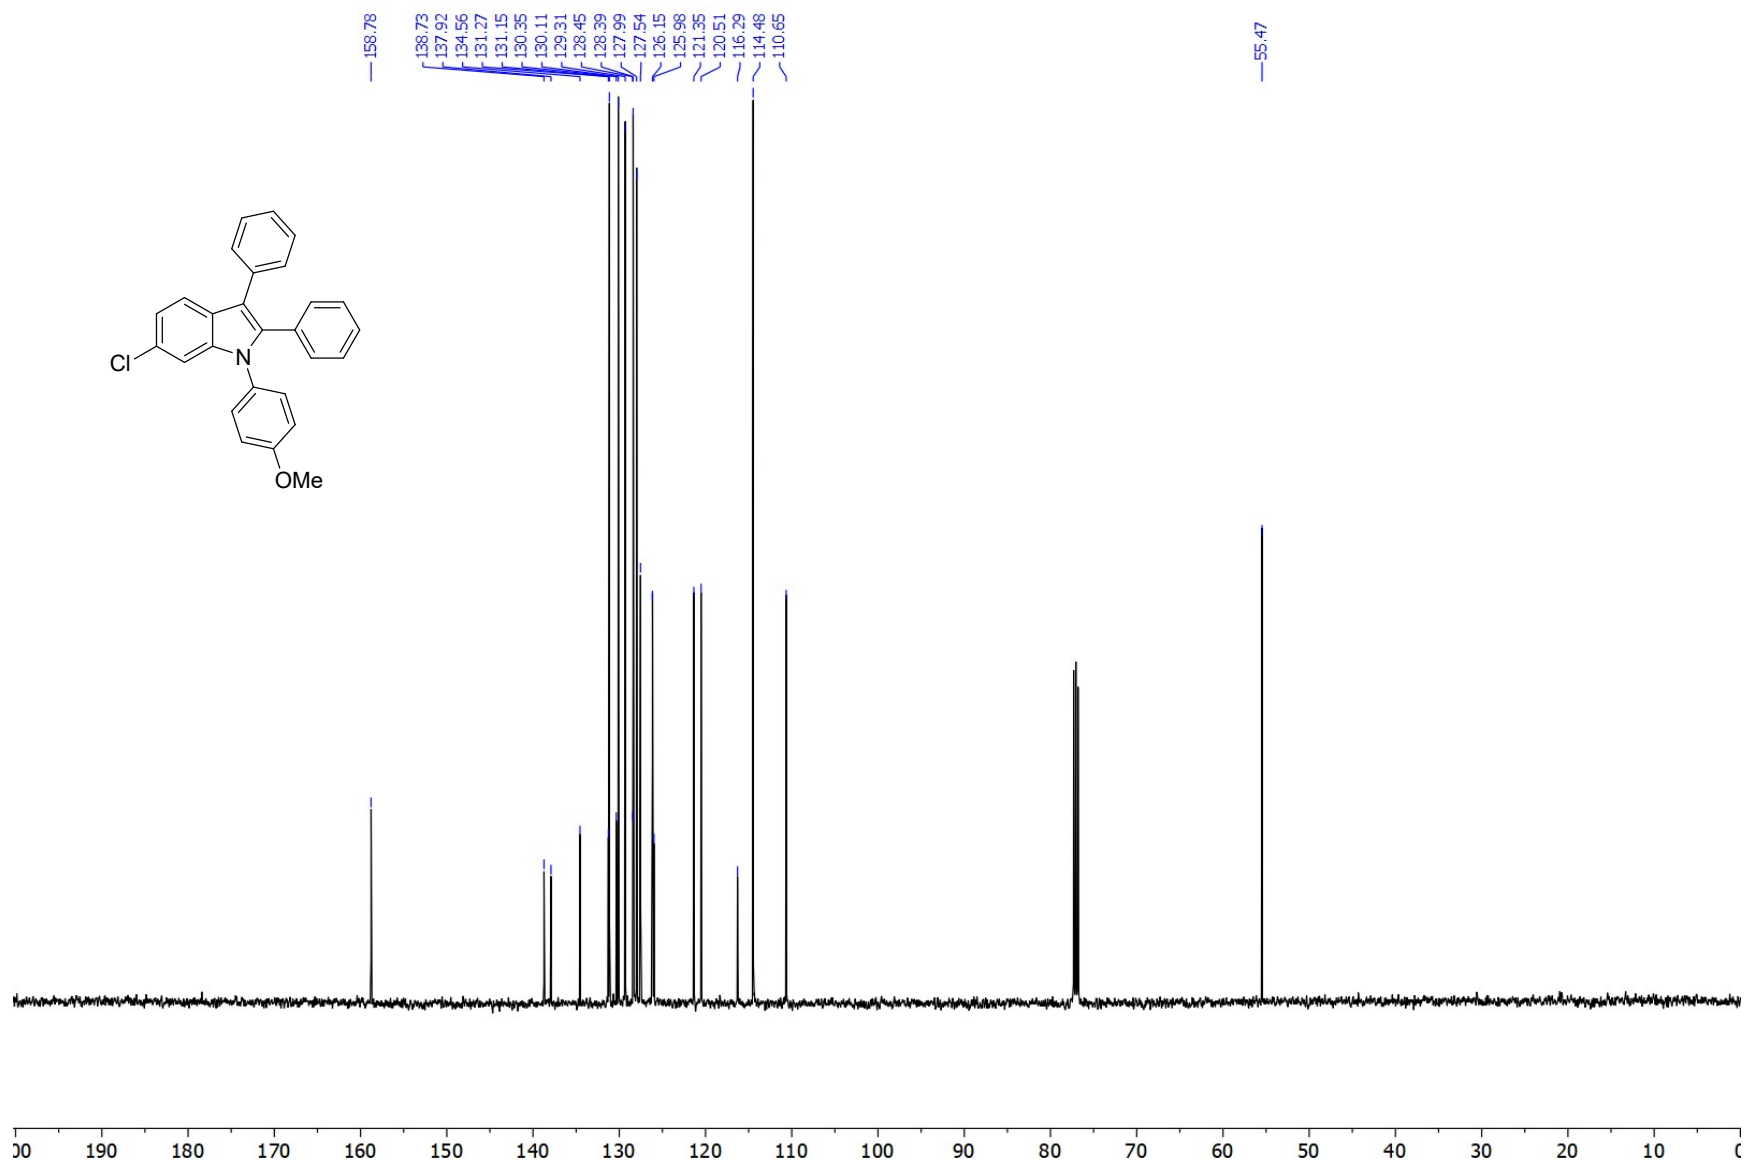

$^1\text{H}$  NMR of compound **7** ( $\text{CDCl}_3$ , 500 MHz)

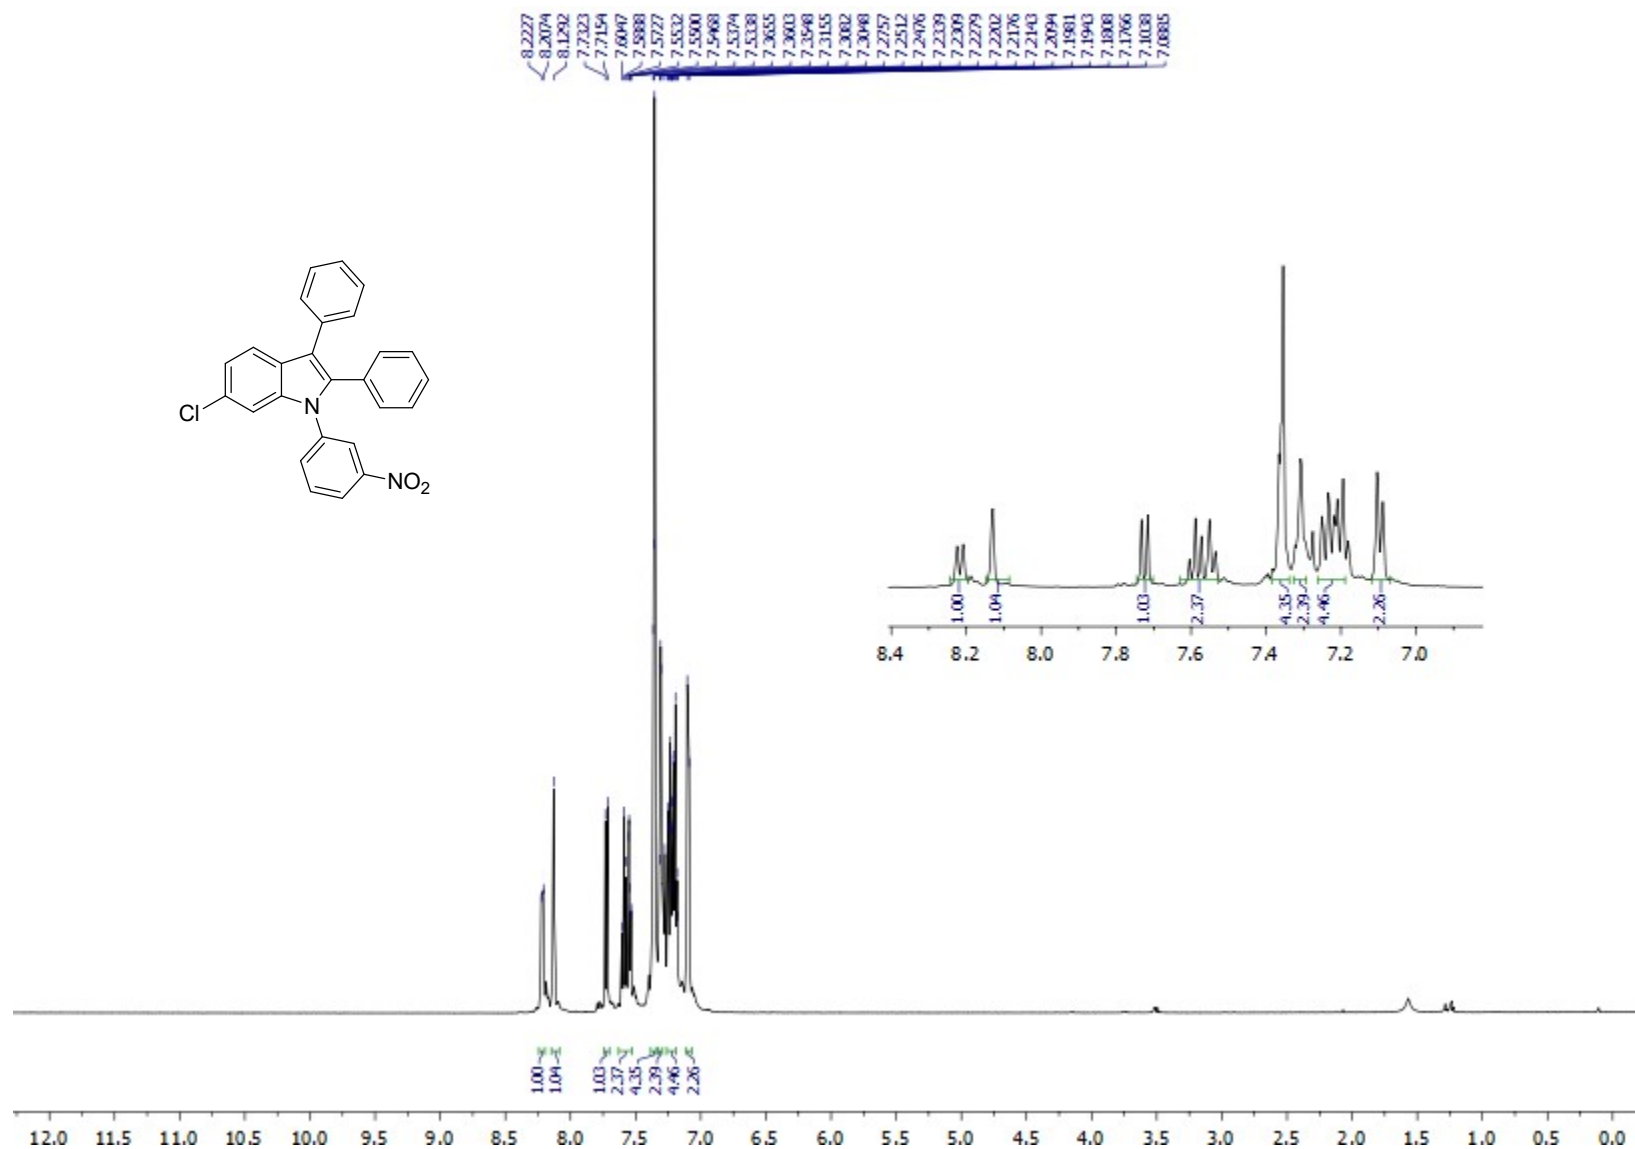



$^{13}\text{C}$  NMR of compound **7** ( $\text{CDCl}_3$ , 125 MHz)

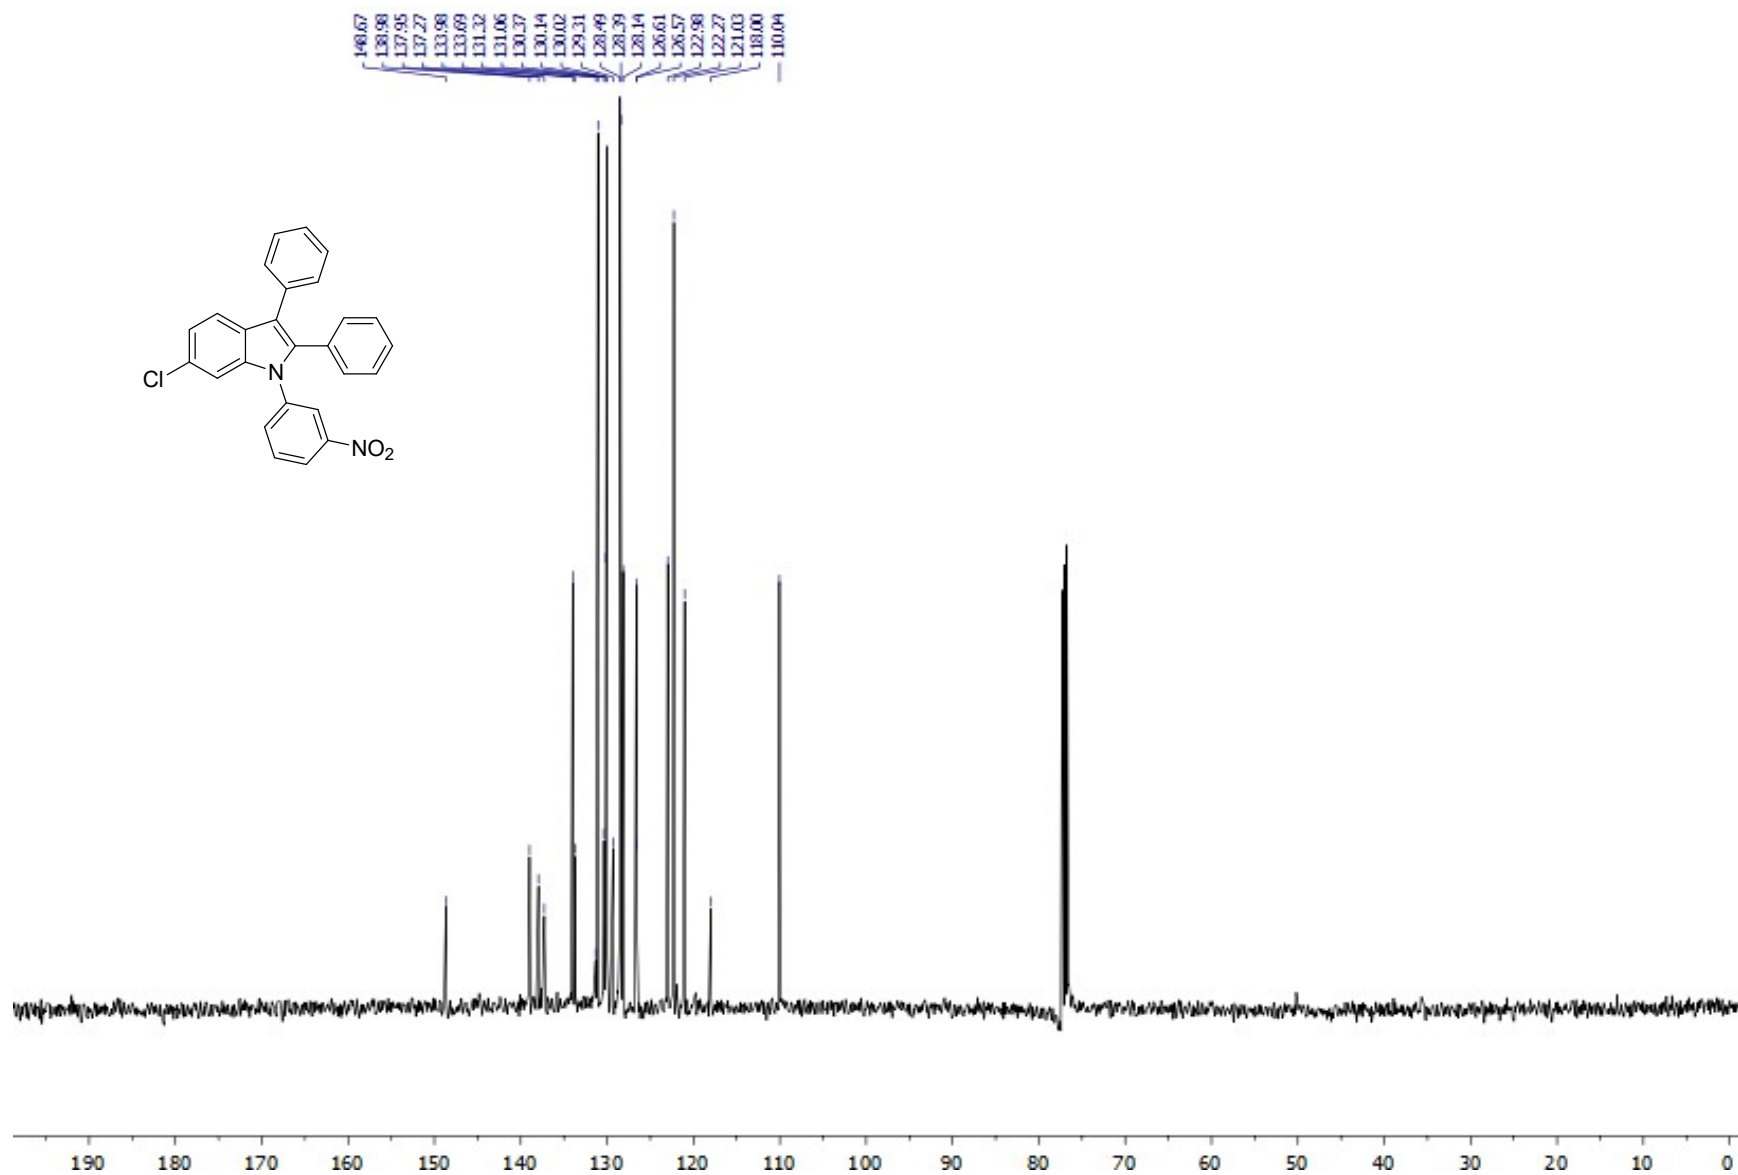

$^1\text{H}$  NMR of Compound **8** ( $\text{CDCl}_3$ , 500 MHz)

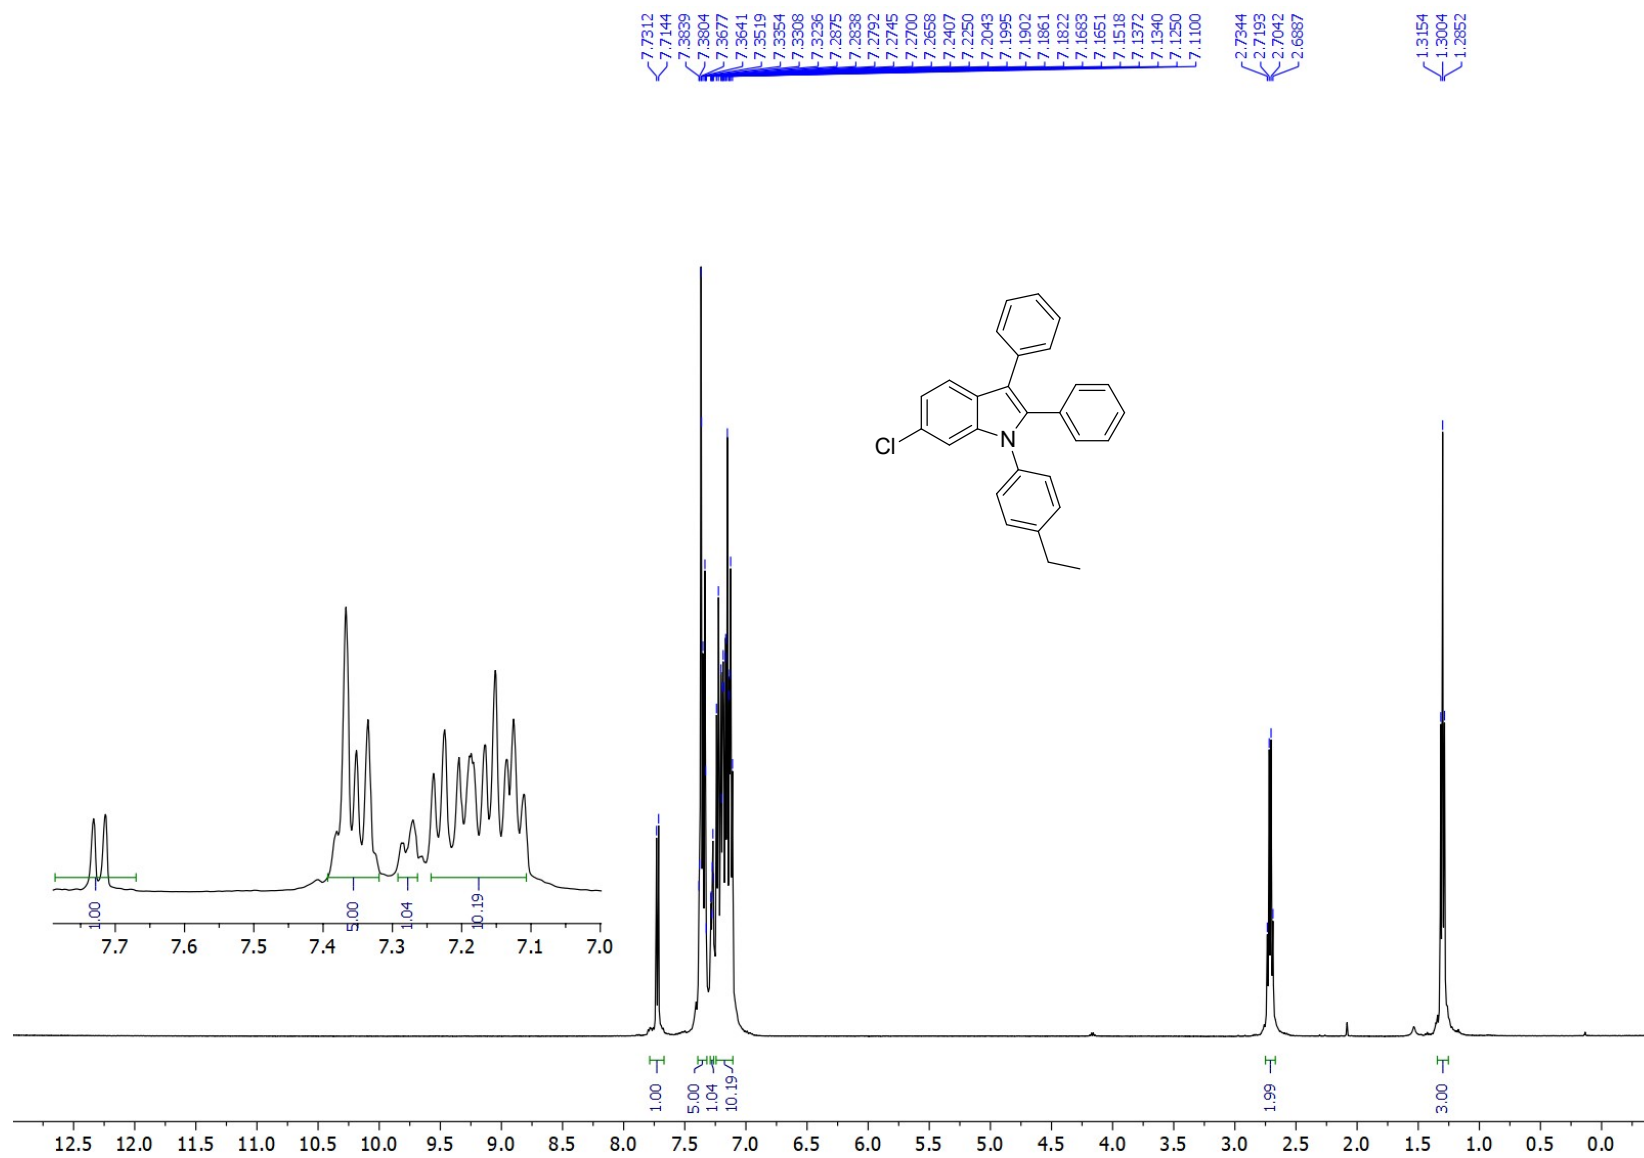

$^{13}\text{C}$  NMR of compound **8** ( $\text{CDCl}_3$ , 125 MHz)

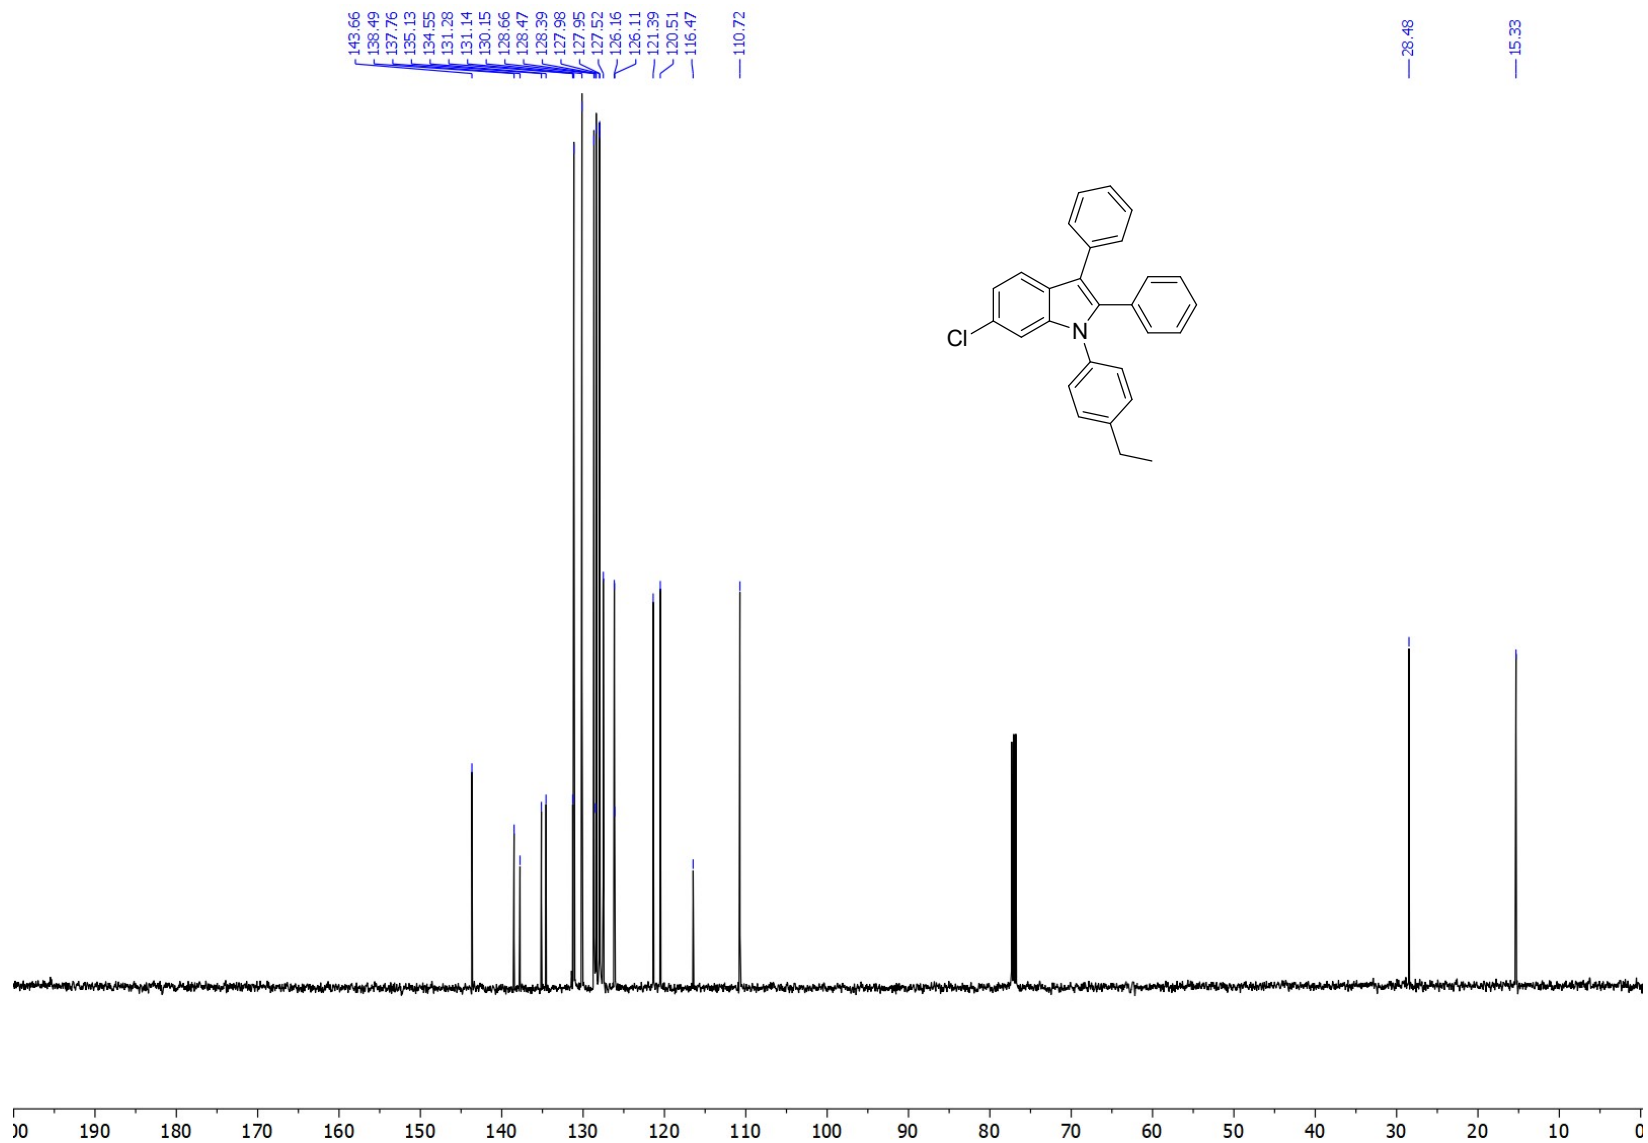

<sup>1</sup>H NMR of Compound 9 (CDCl<sub>3</sub>, 500 MHz)

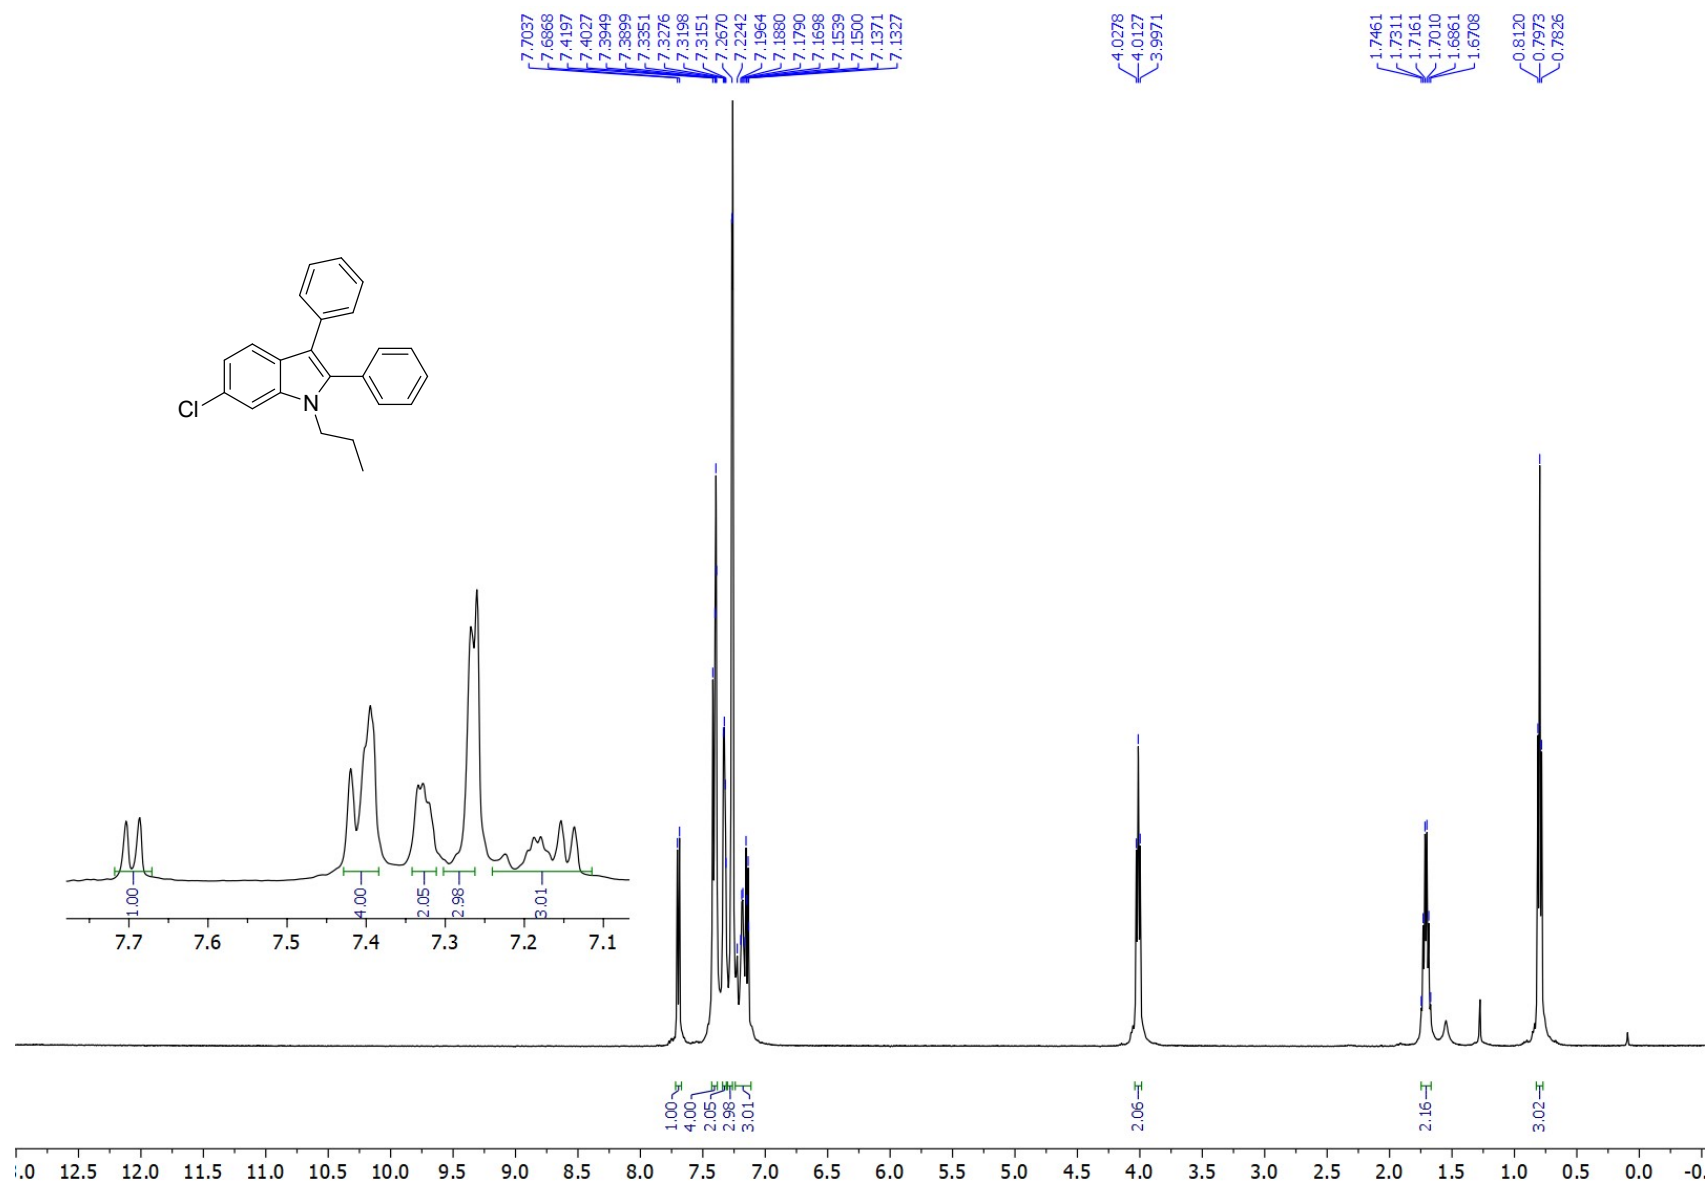

$^{13}\text{C}$  NMR of compound **9** ( $\text{CDCl}_3$ , 125 MHz)

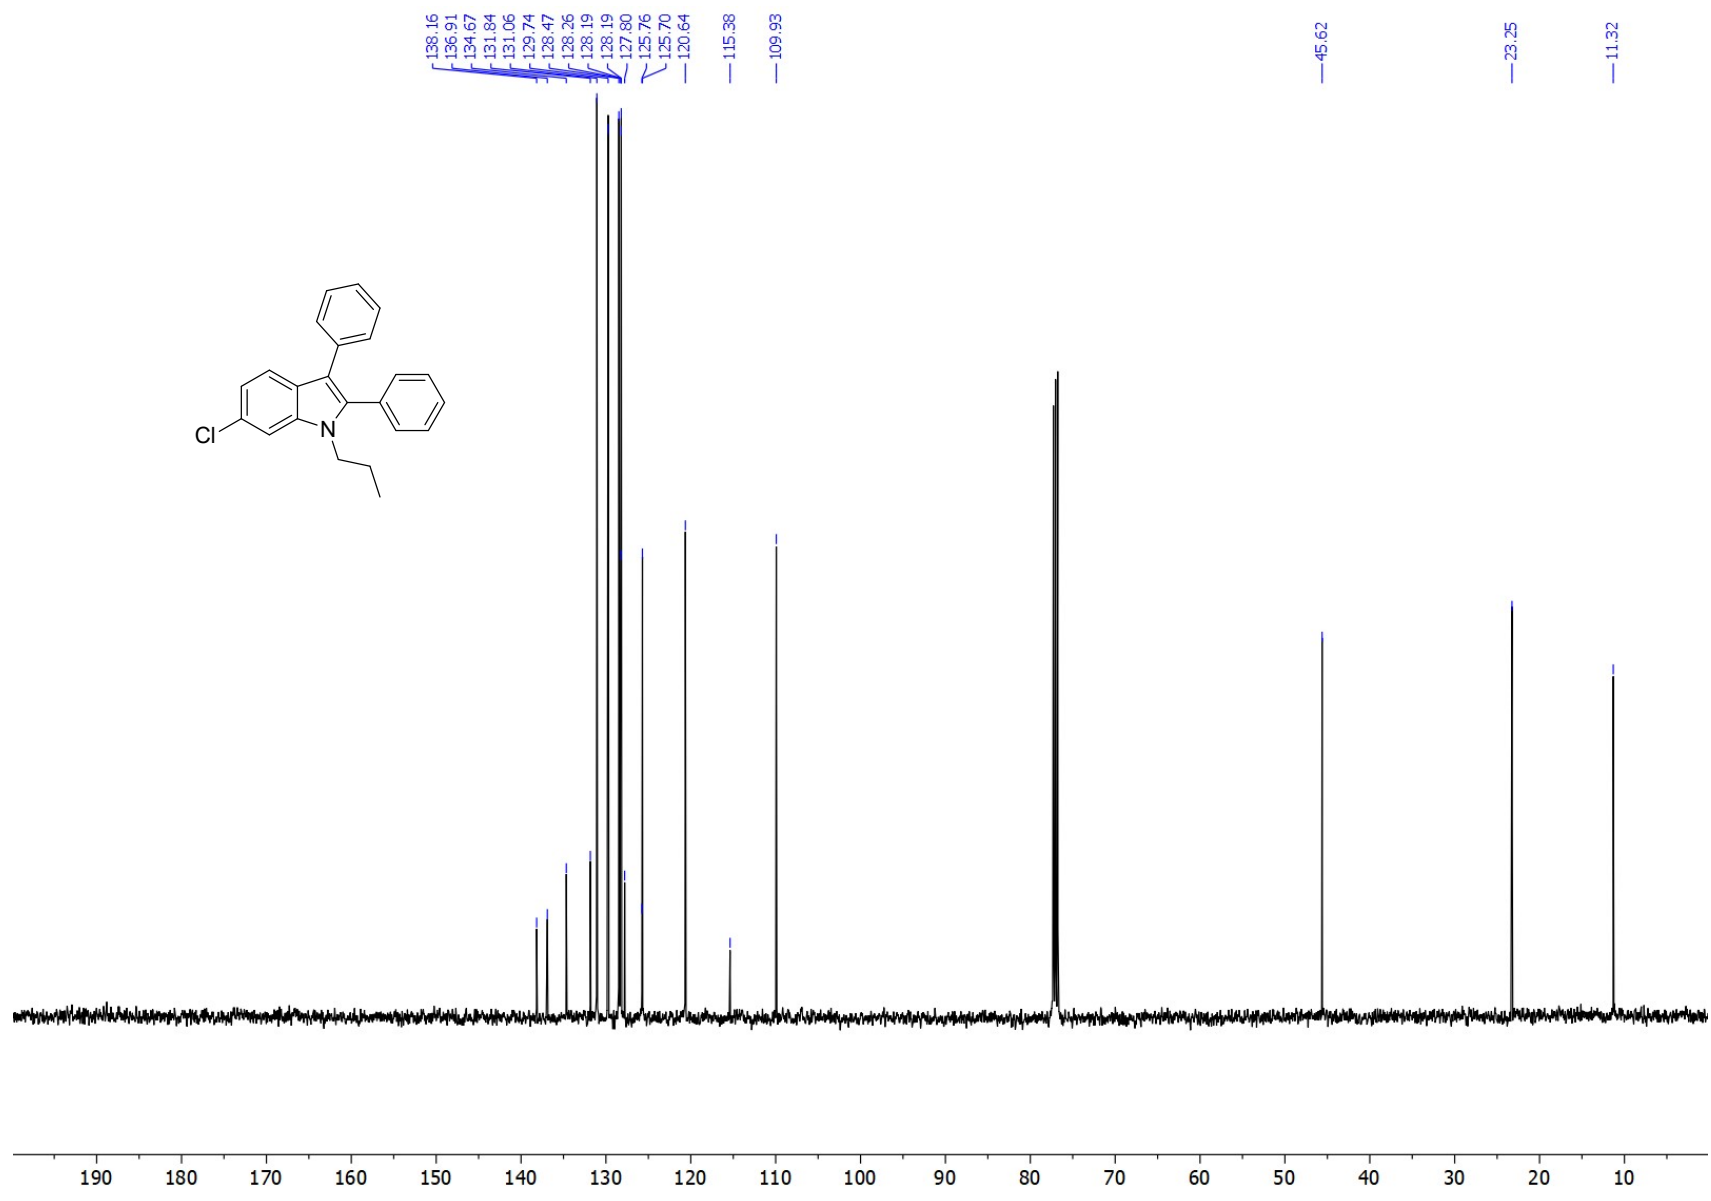

$^1\text{H}$  NMR of Compound **10** ( $\text{CDCl}_3$ , 500 MHz)

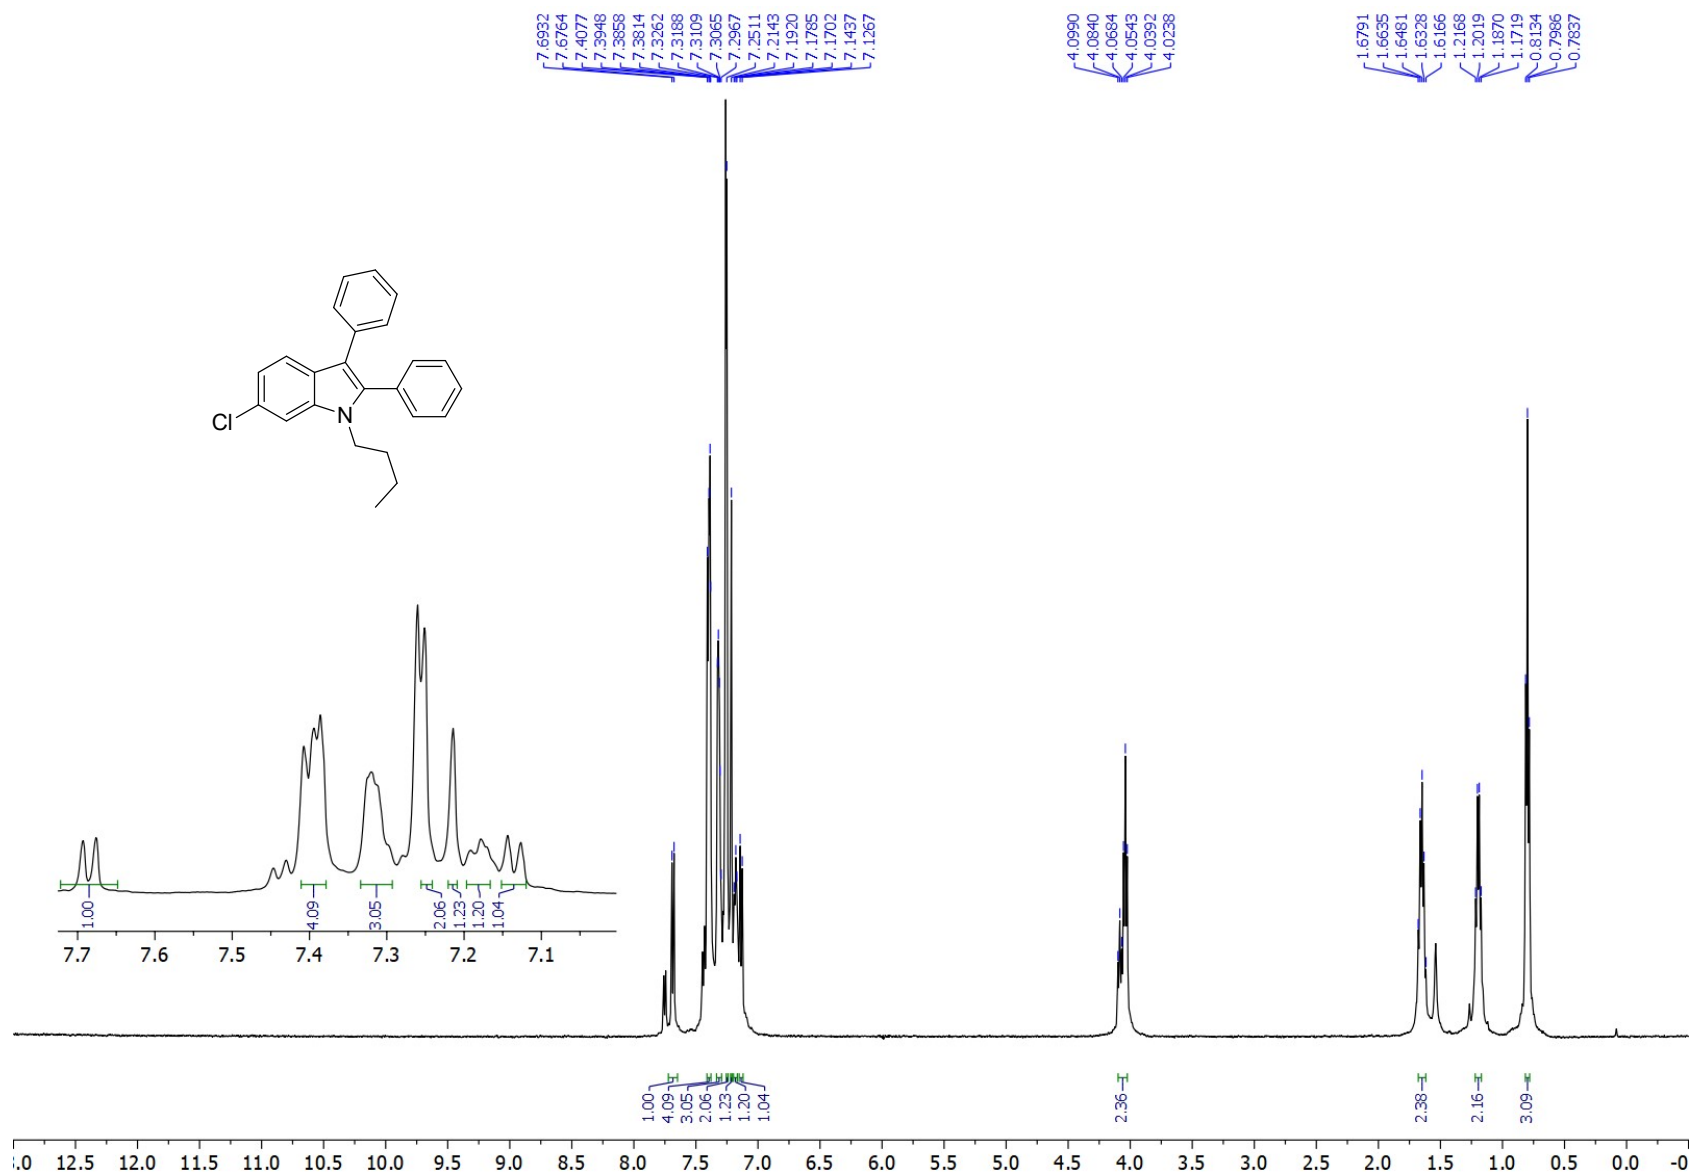

$^{13}\text{C}$  NMR of compound **10** ( $\text{CDCl}_3$ , 125 MHz)

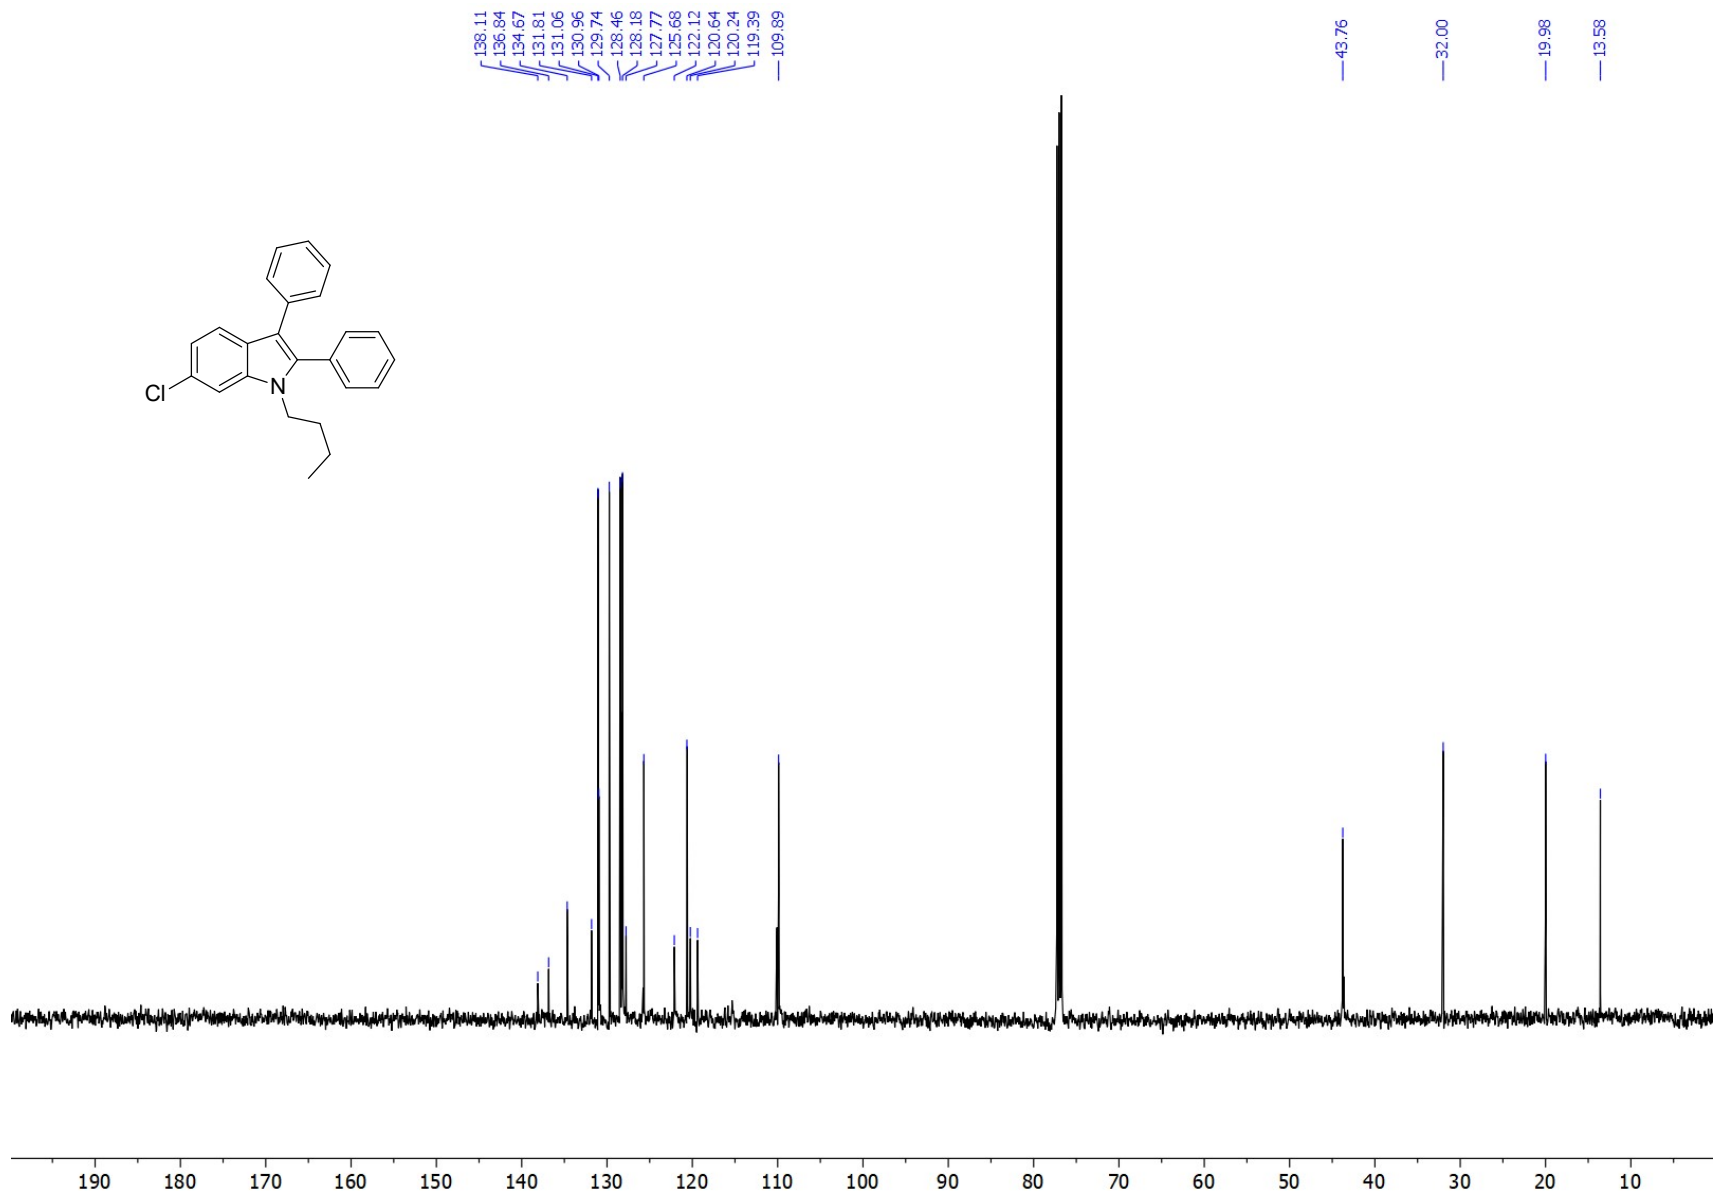

<sup>1</sup>H NMR of Compound **11** (CDCl<sub>3</sub>, 500 MHz)

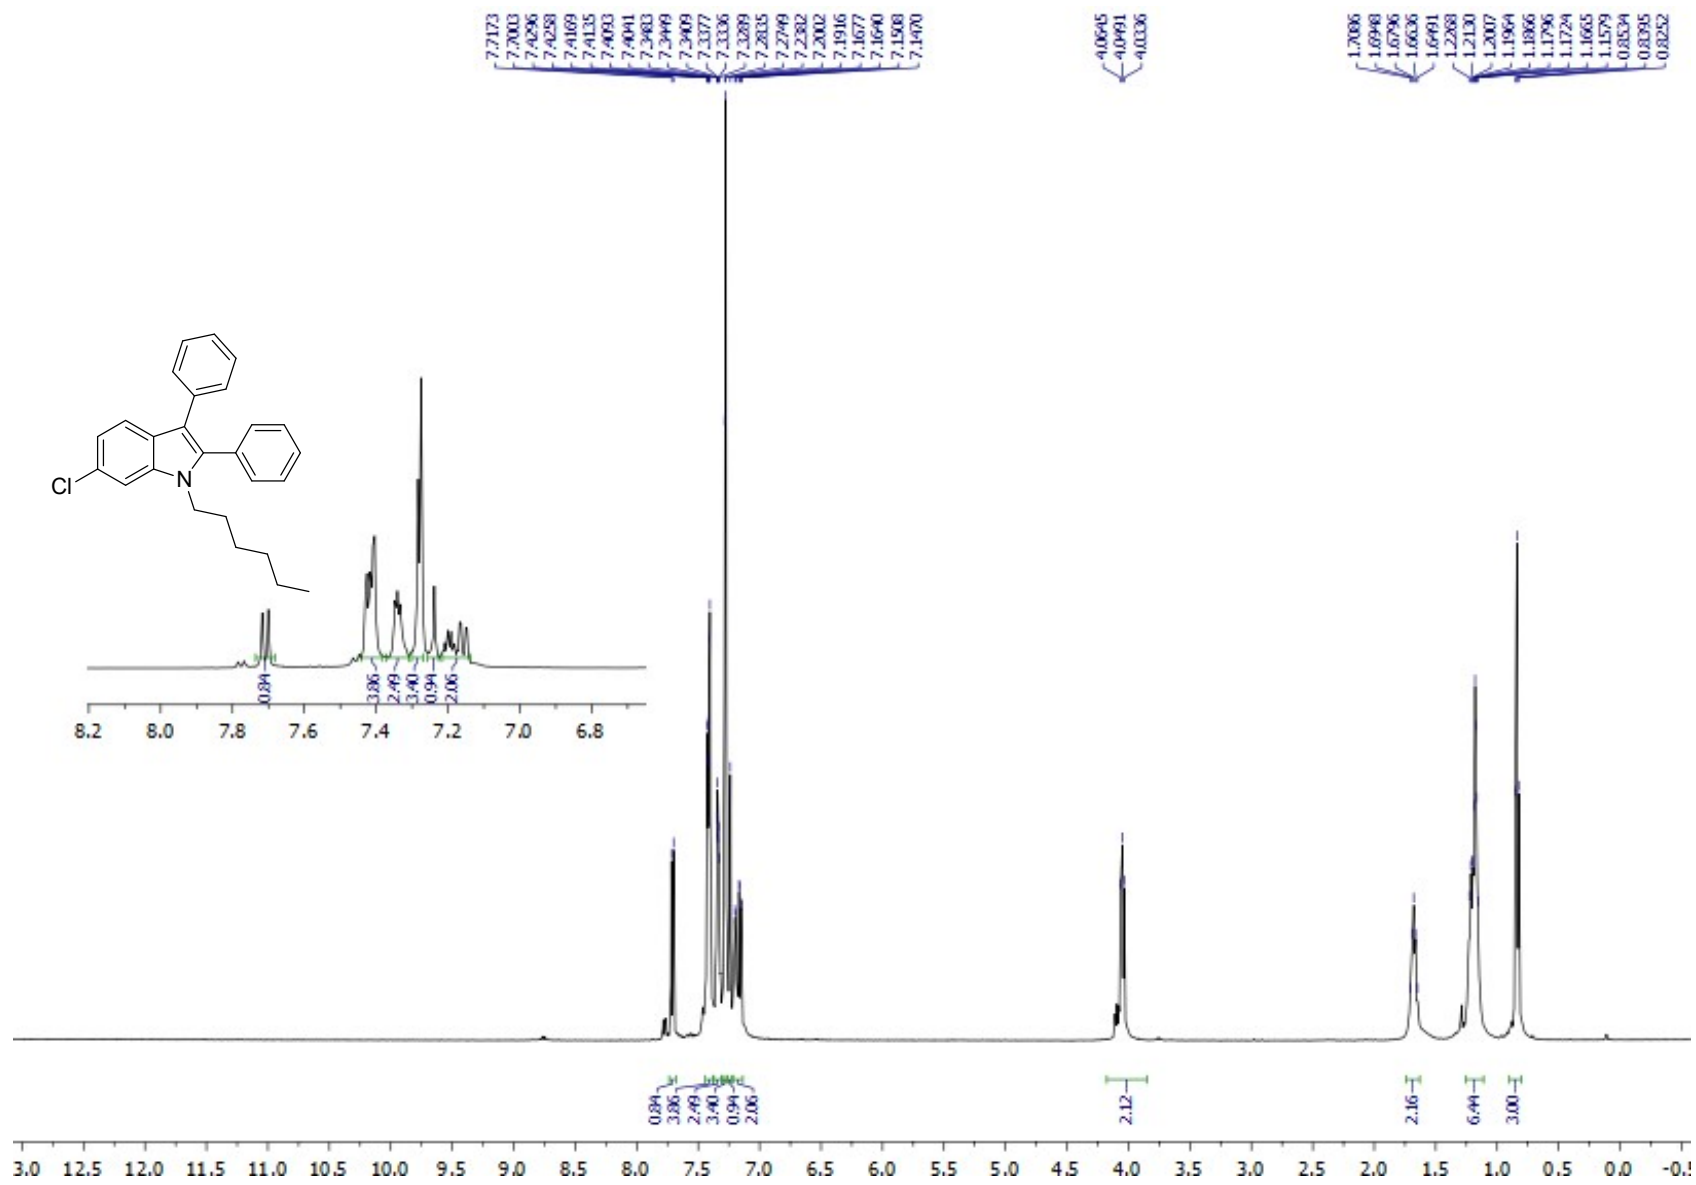



$^{13}\text{C}$  NMR of compound **11** ( $\text{CDCl}_3$ , 125 MHz)

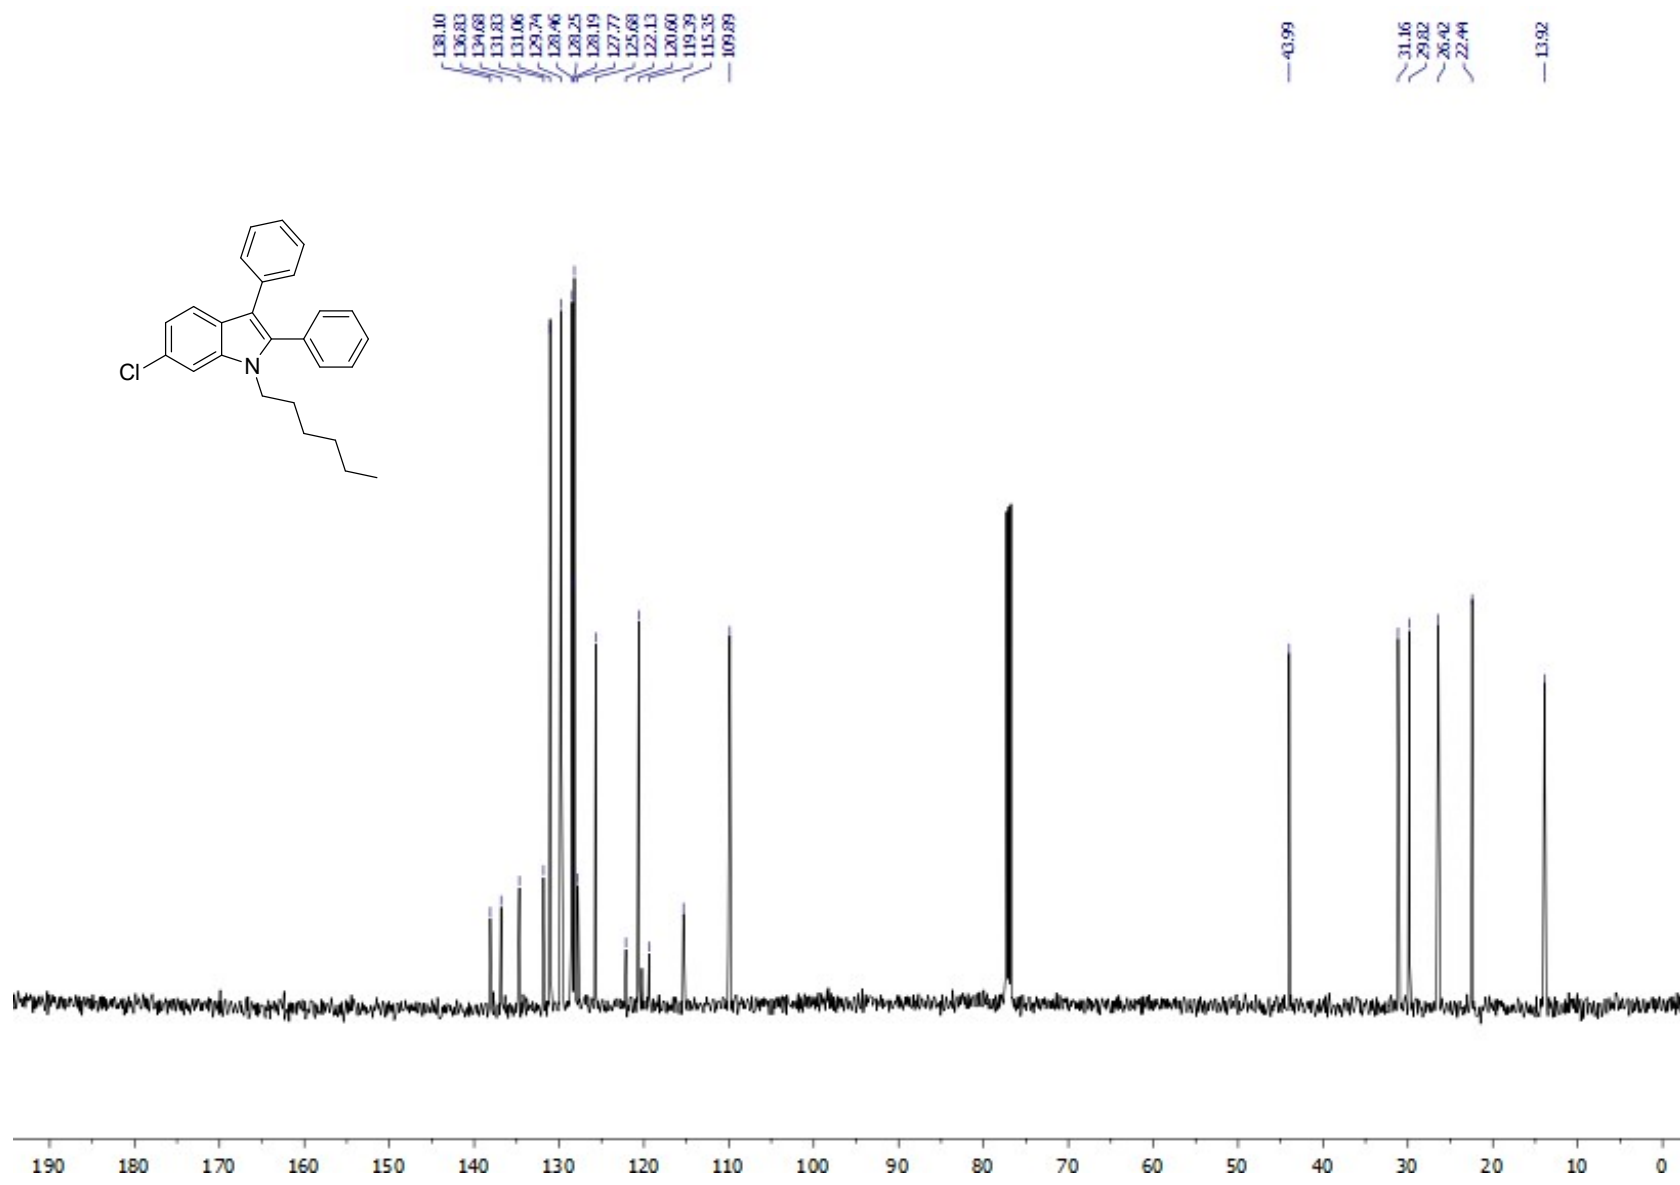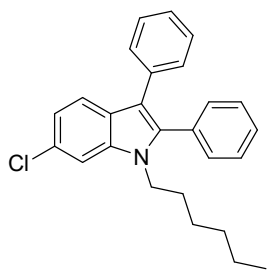

$^1\text{H}$  NMR of Compound **12** ( $\text{CDCl}_3$ , 500 MHz)

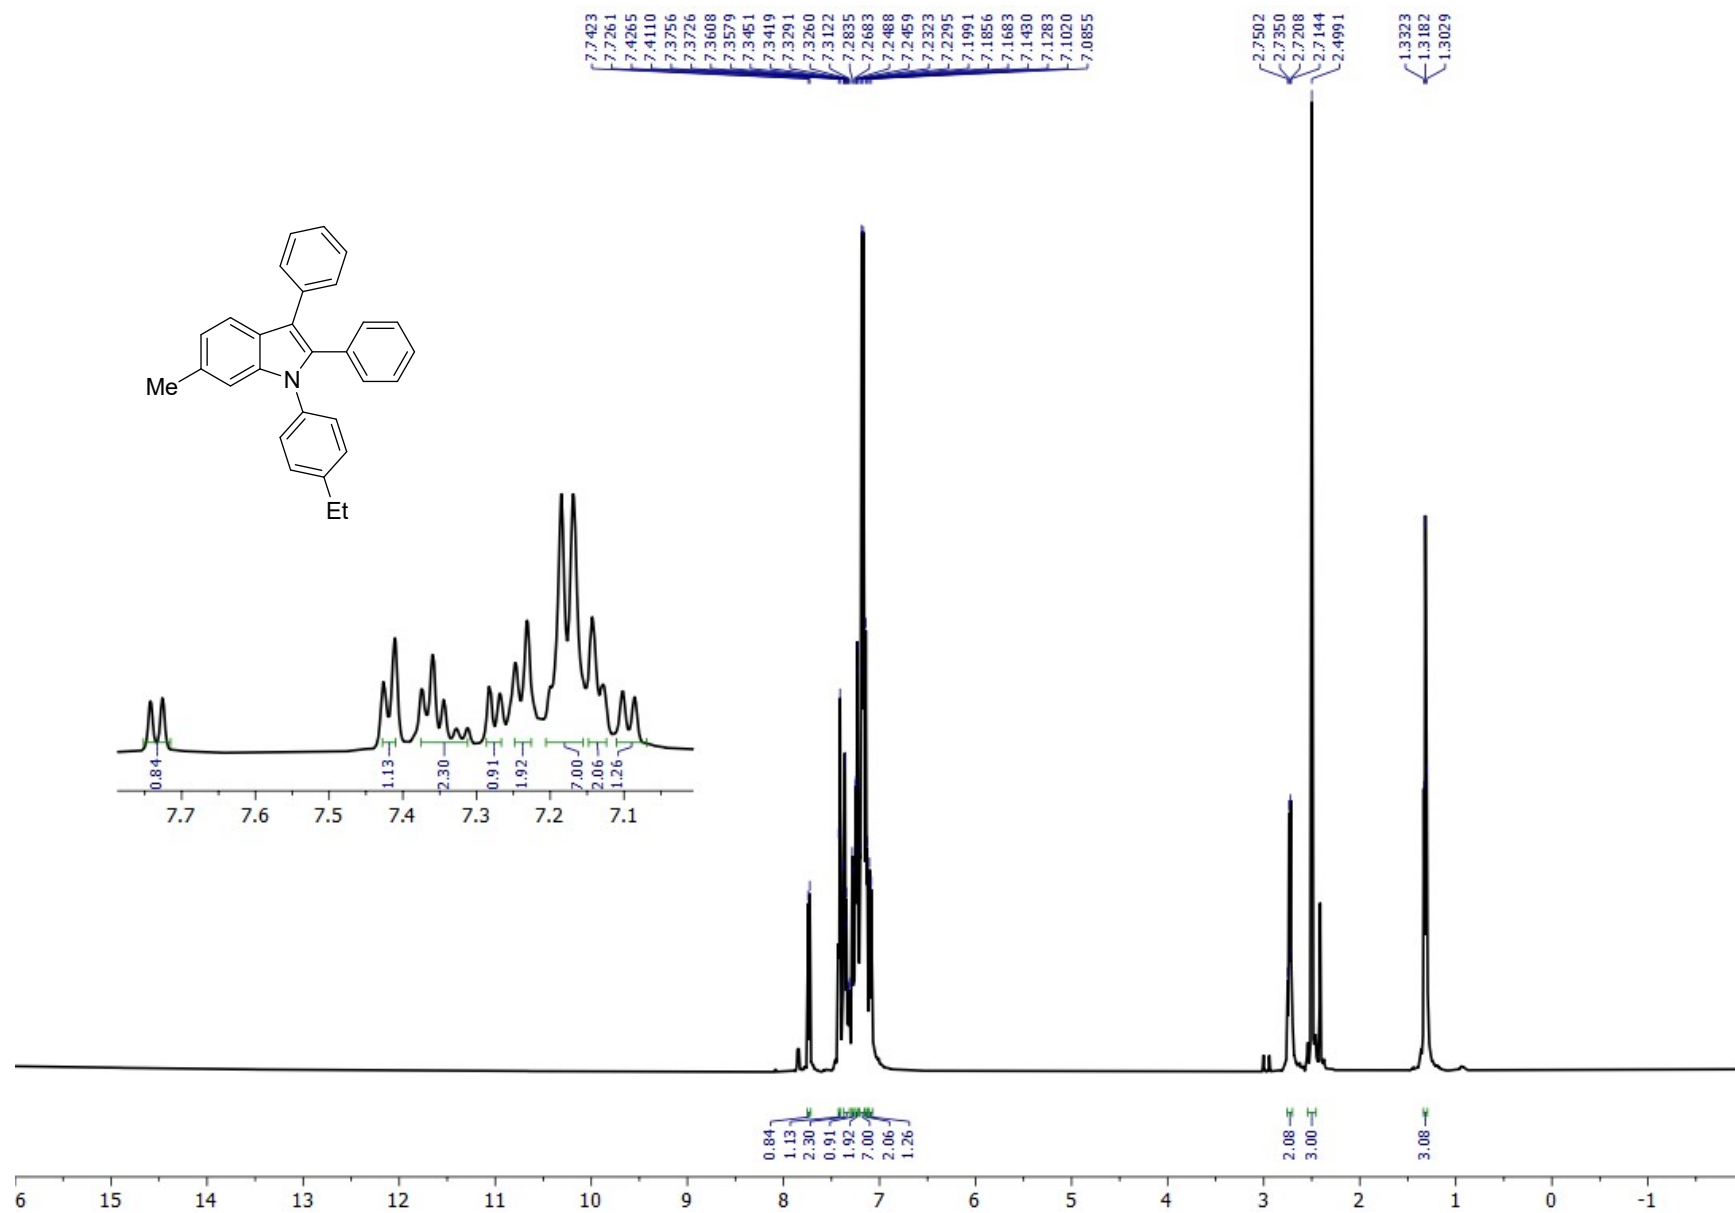

$^{13}\text{C}$  NMR of compound **12** ( $\text{CDCl}_3$ , 125 MHz)

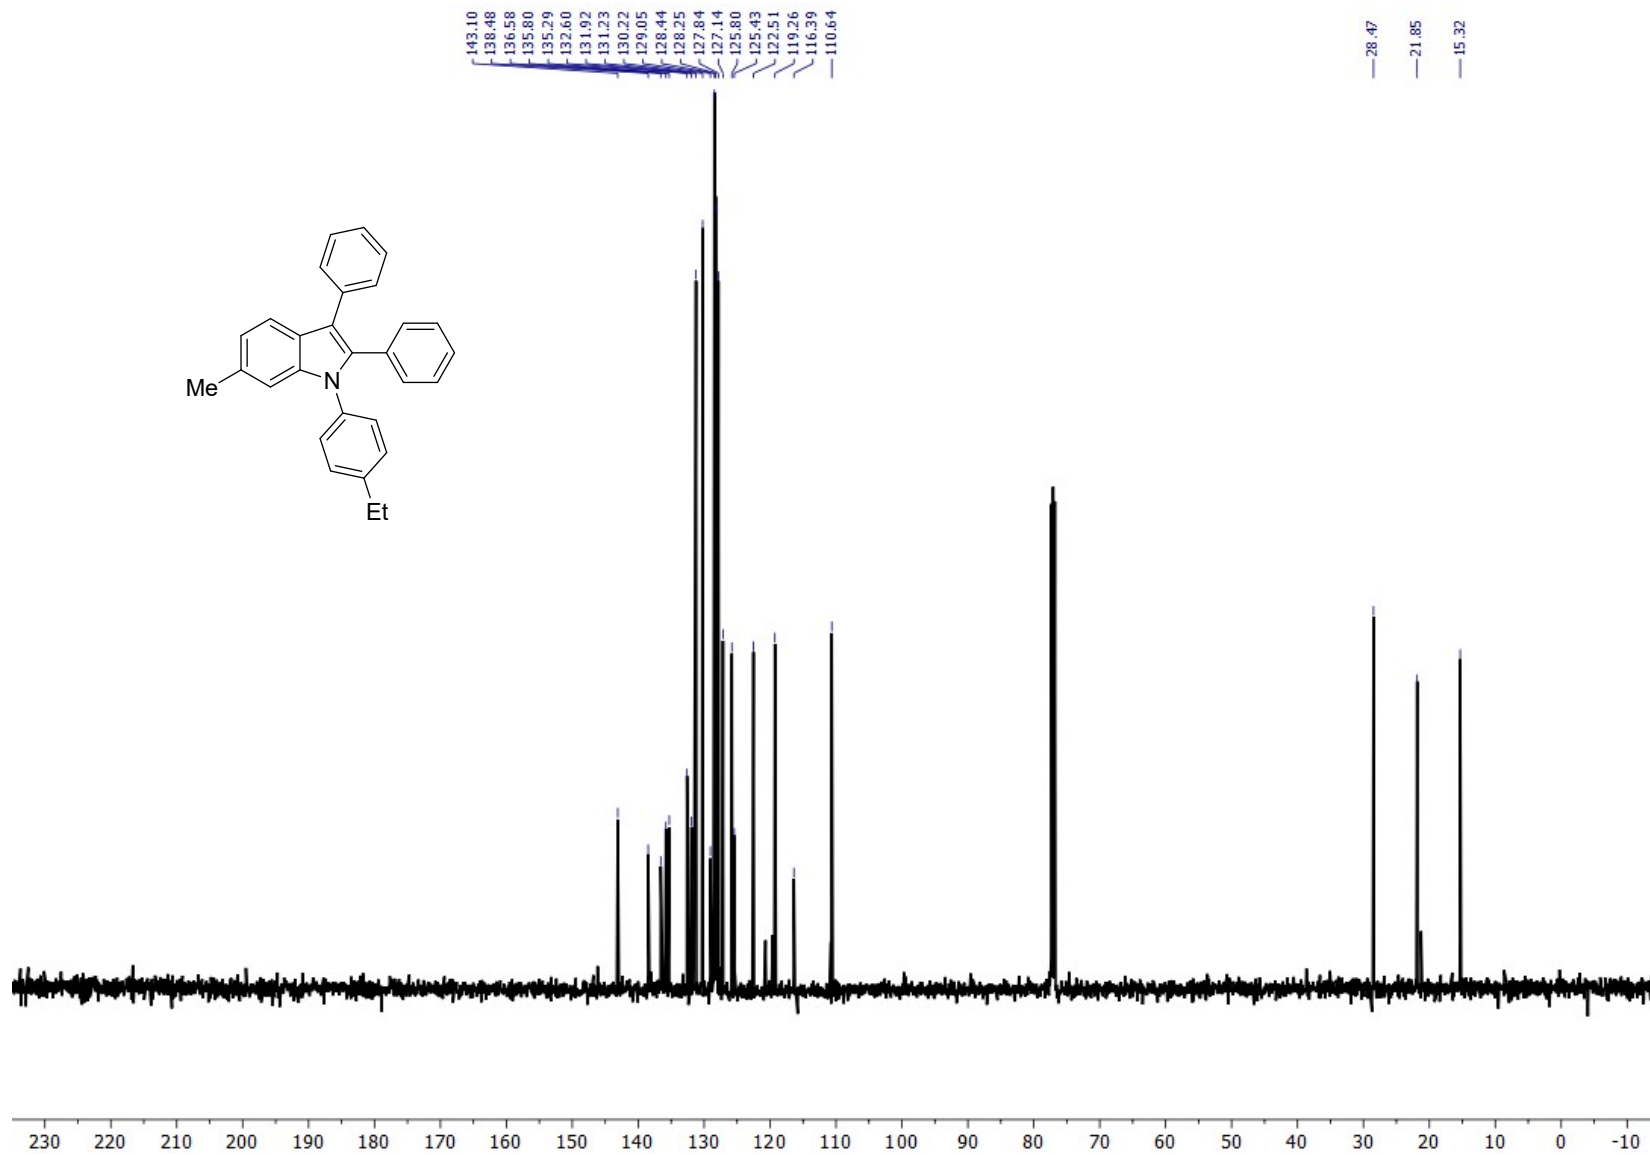

<sup>1</sup>H NMR of Compound **13** (CDCl<sub>3</sub>, 500 MHz)

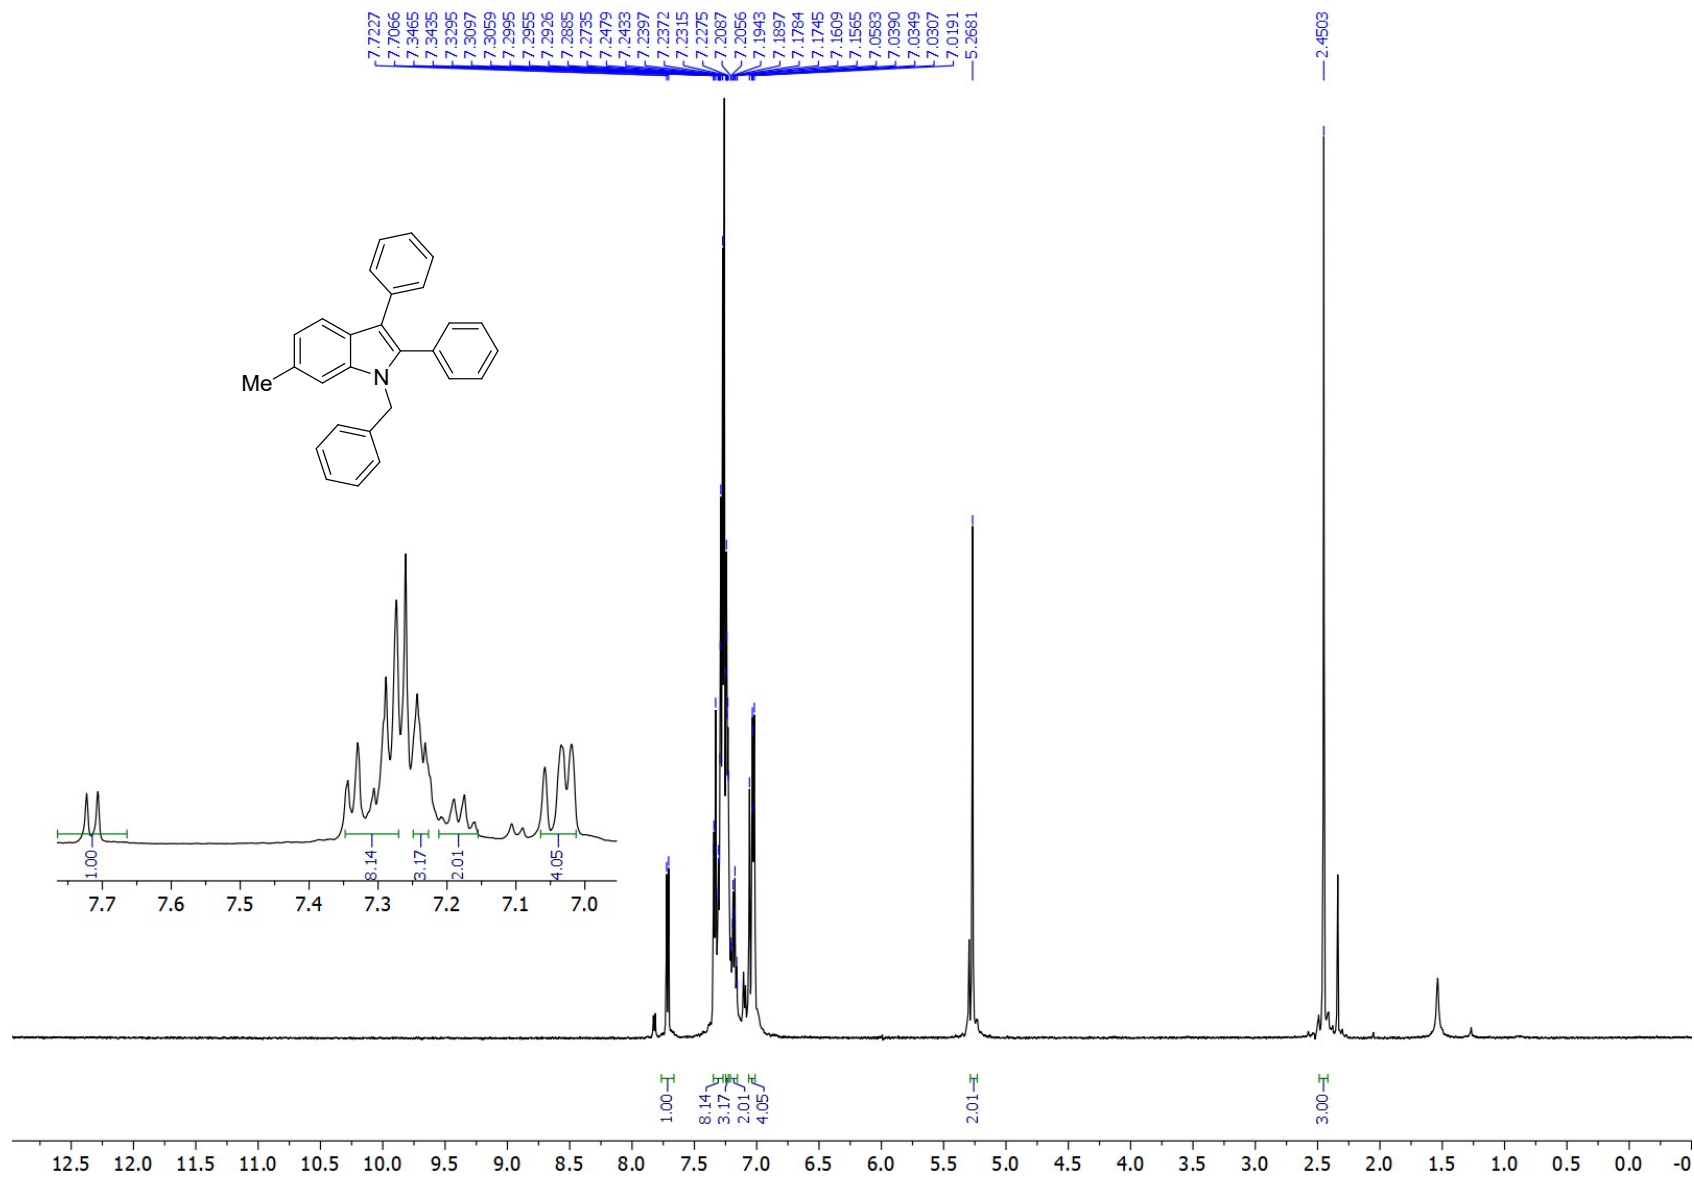

$^{13}\text{C}$  NMR of compound **13** ( $\text{CDCl}_3$ , 125 MHz)

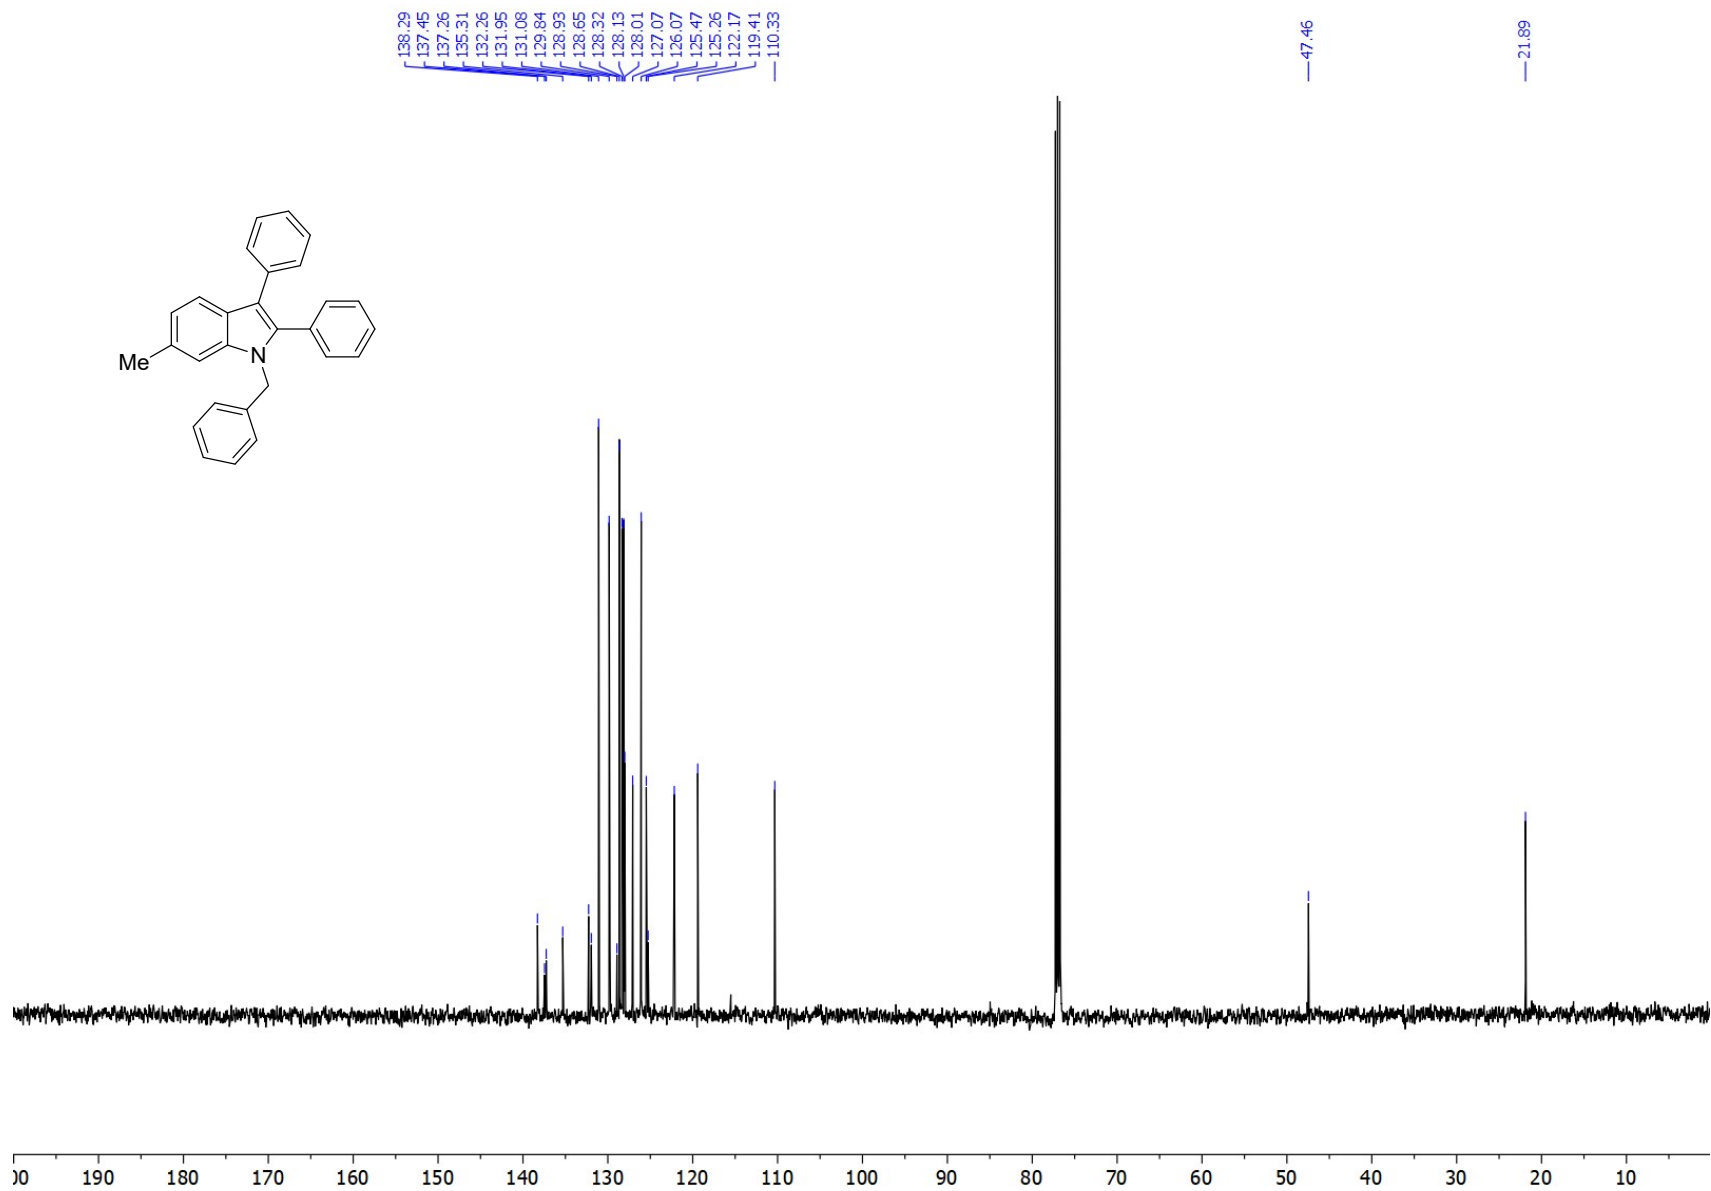

<sup>1</sup>H NMR of Compound **14** (CDCl<sub>3</sub>, 500 MHz)

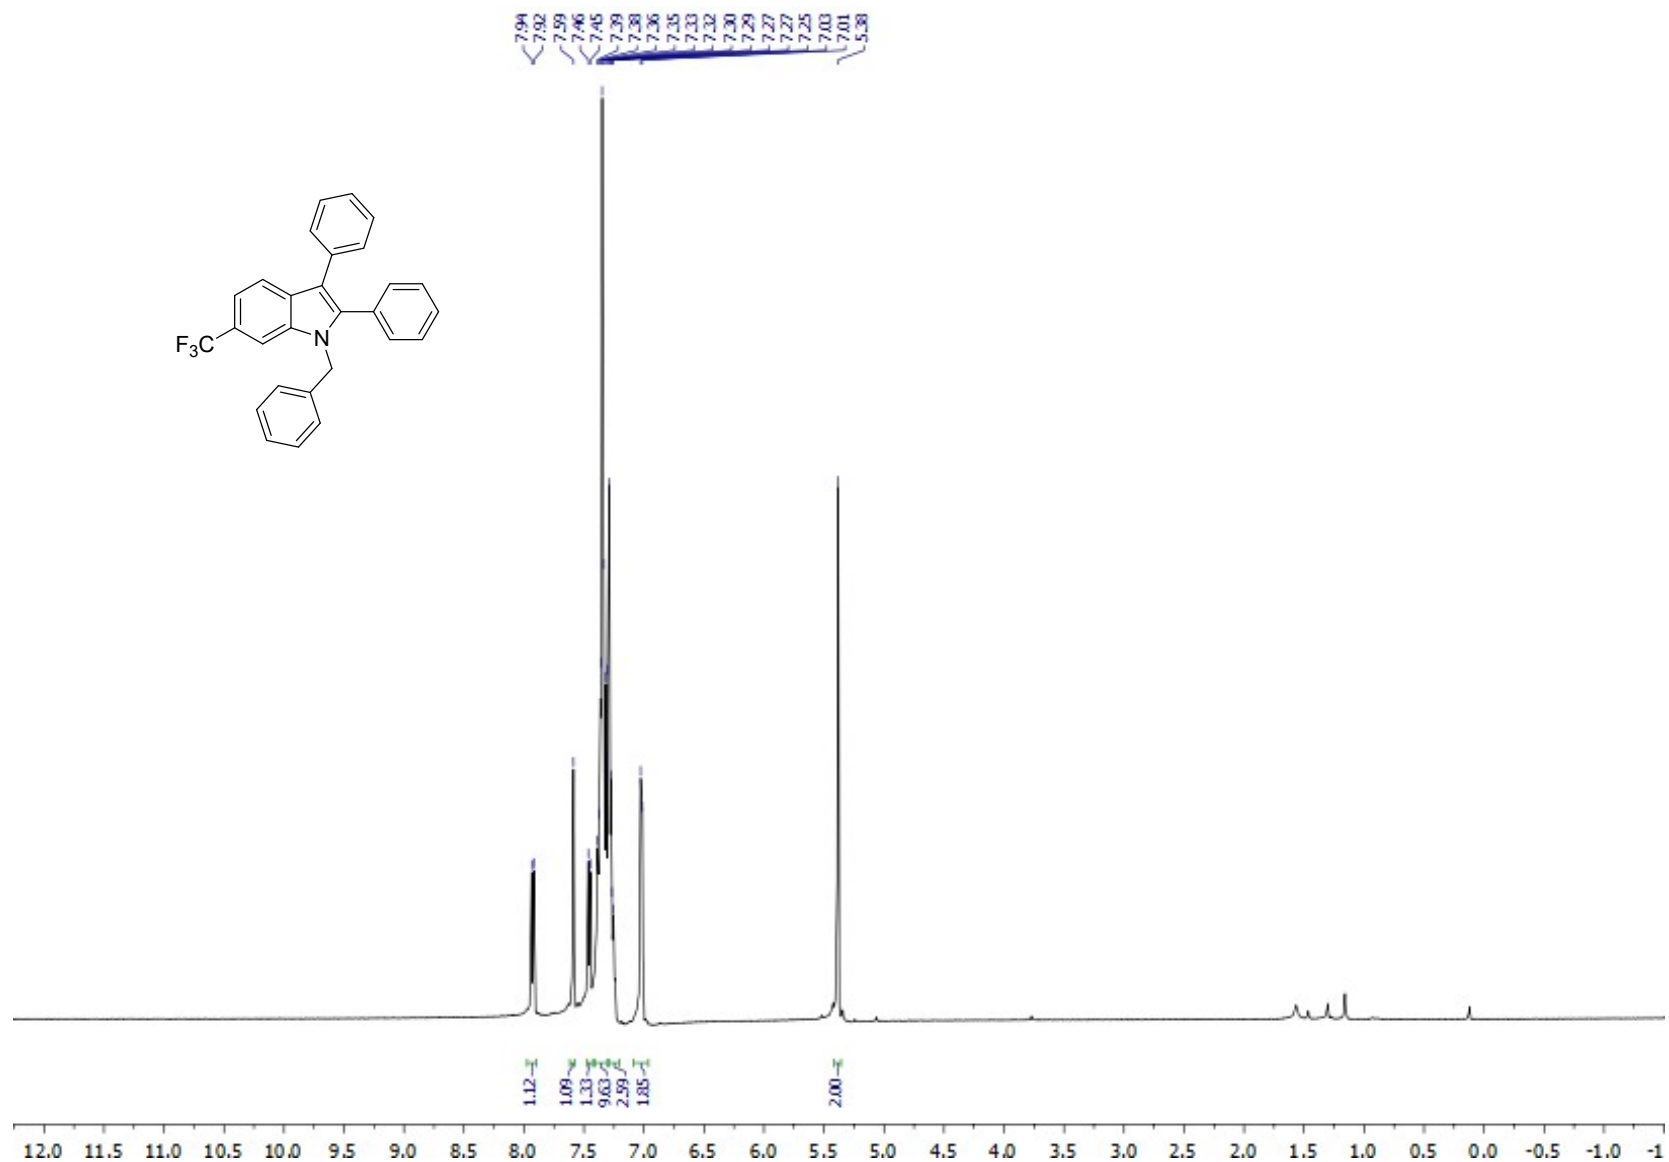

$^{13}\text{C}$  NMR of compound **14** ( $\text{CDCl}_3$ , 125 MHz)

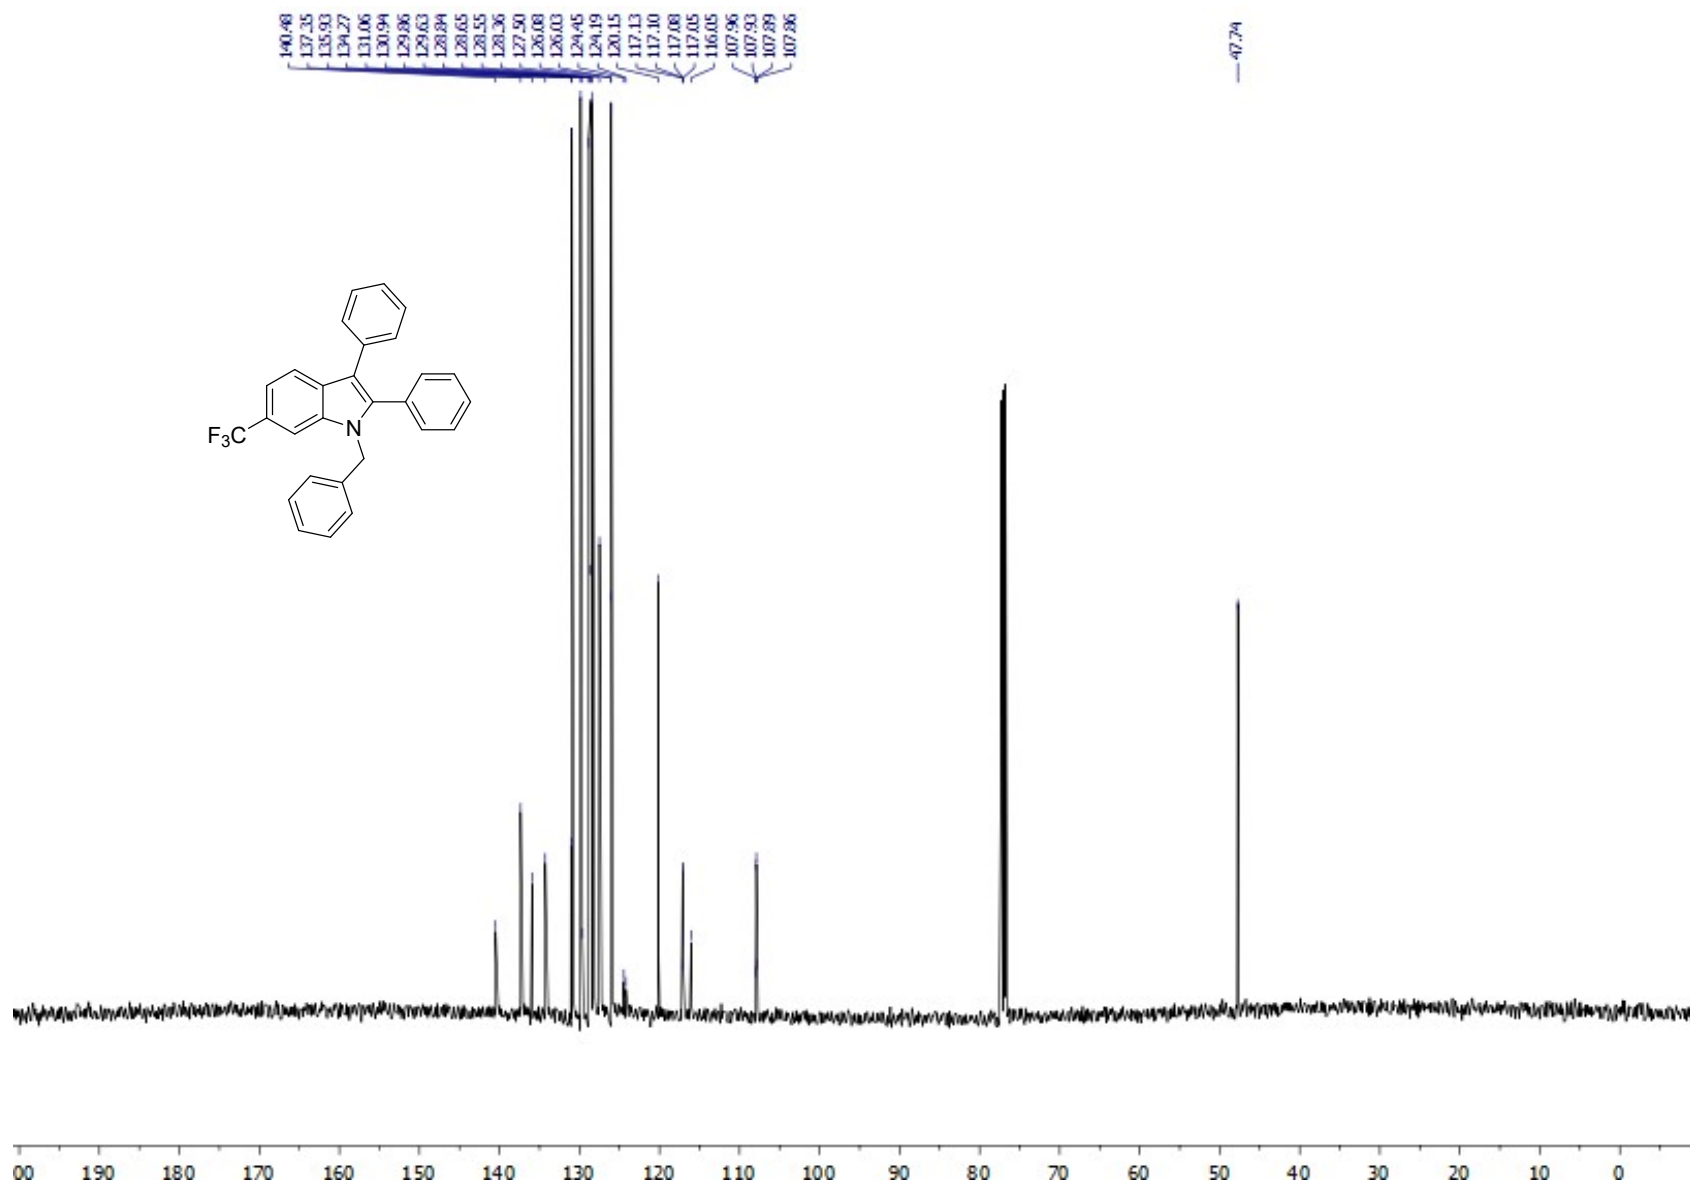

$^1\text{H}$  NMR of Compound **15** ( $\text{CDCl}_3$ , 500 MHz)

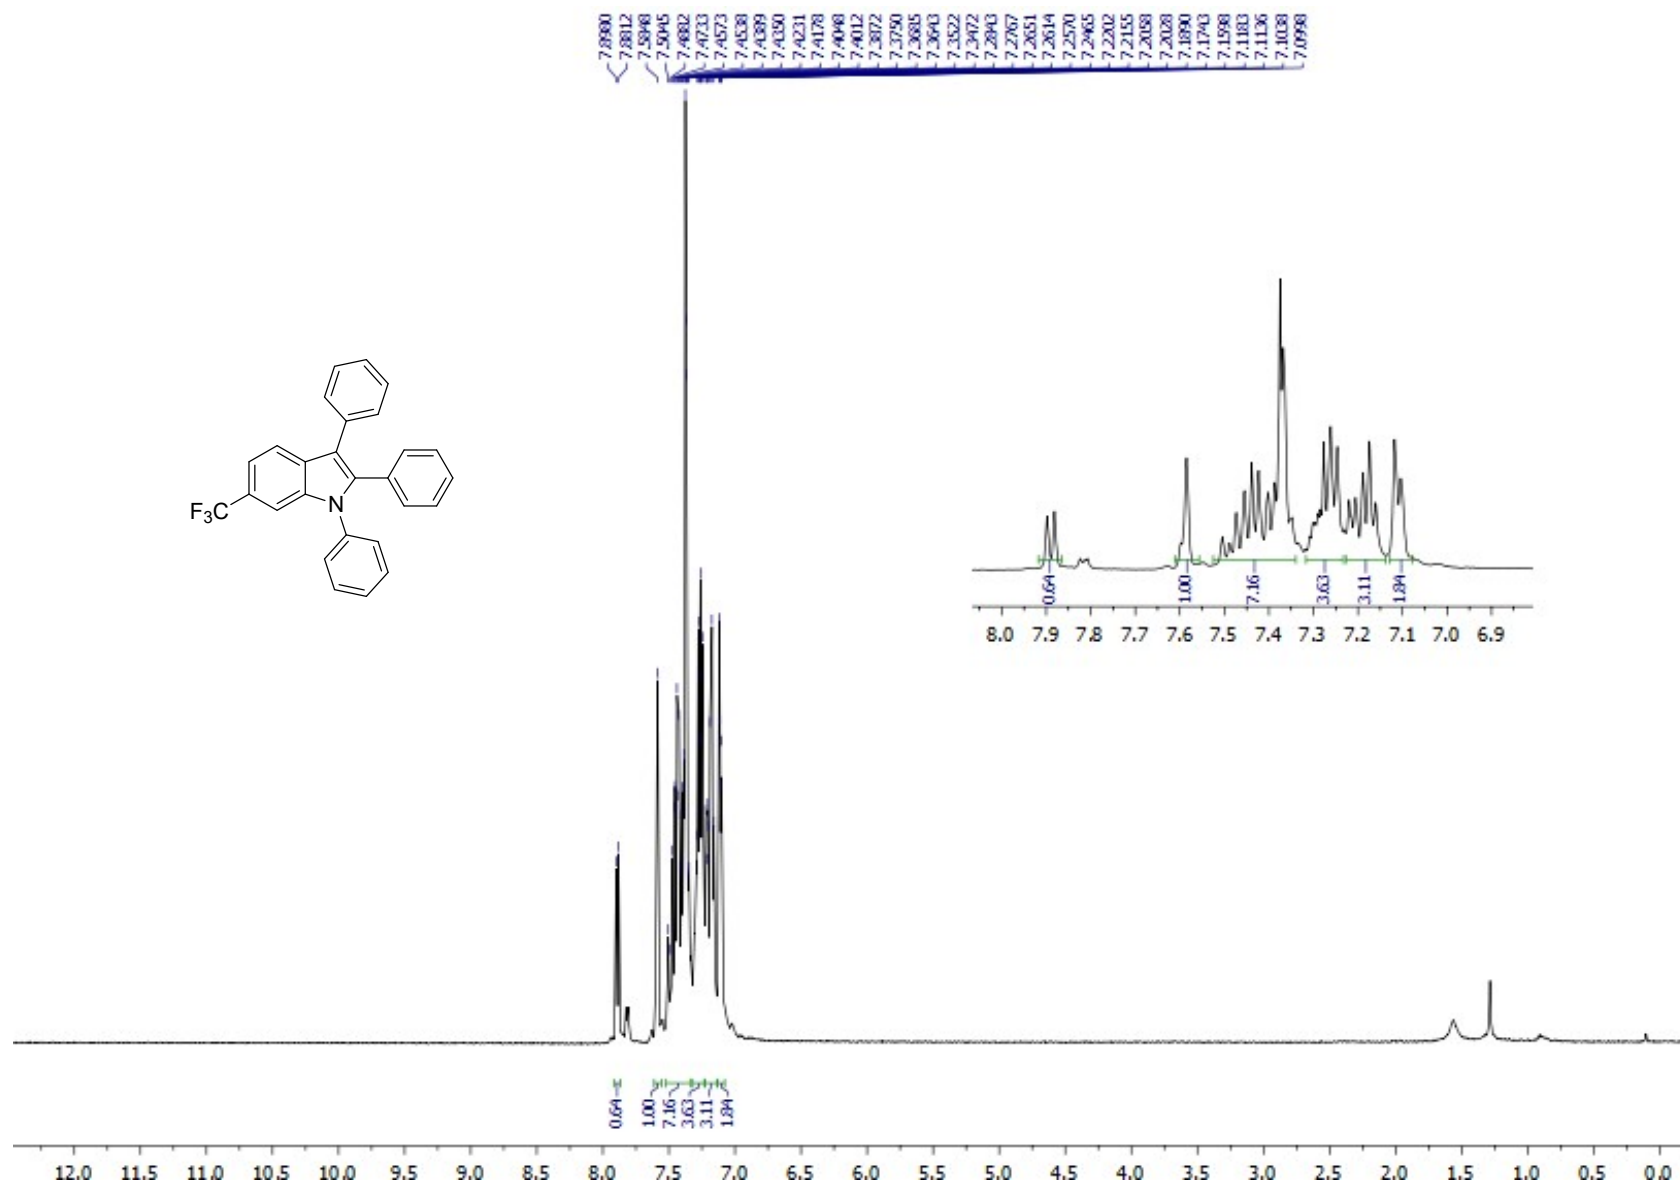



$^{13}\text{C}$  NMR of compound **15** ( $\text{CDCl}_3$ , 125 MHz)

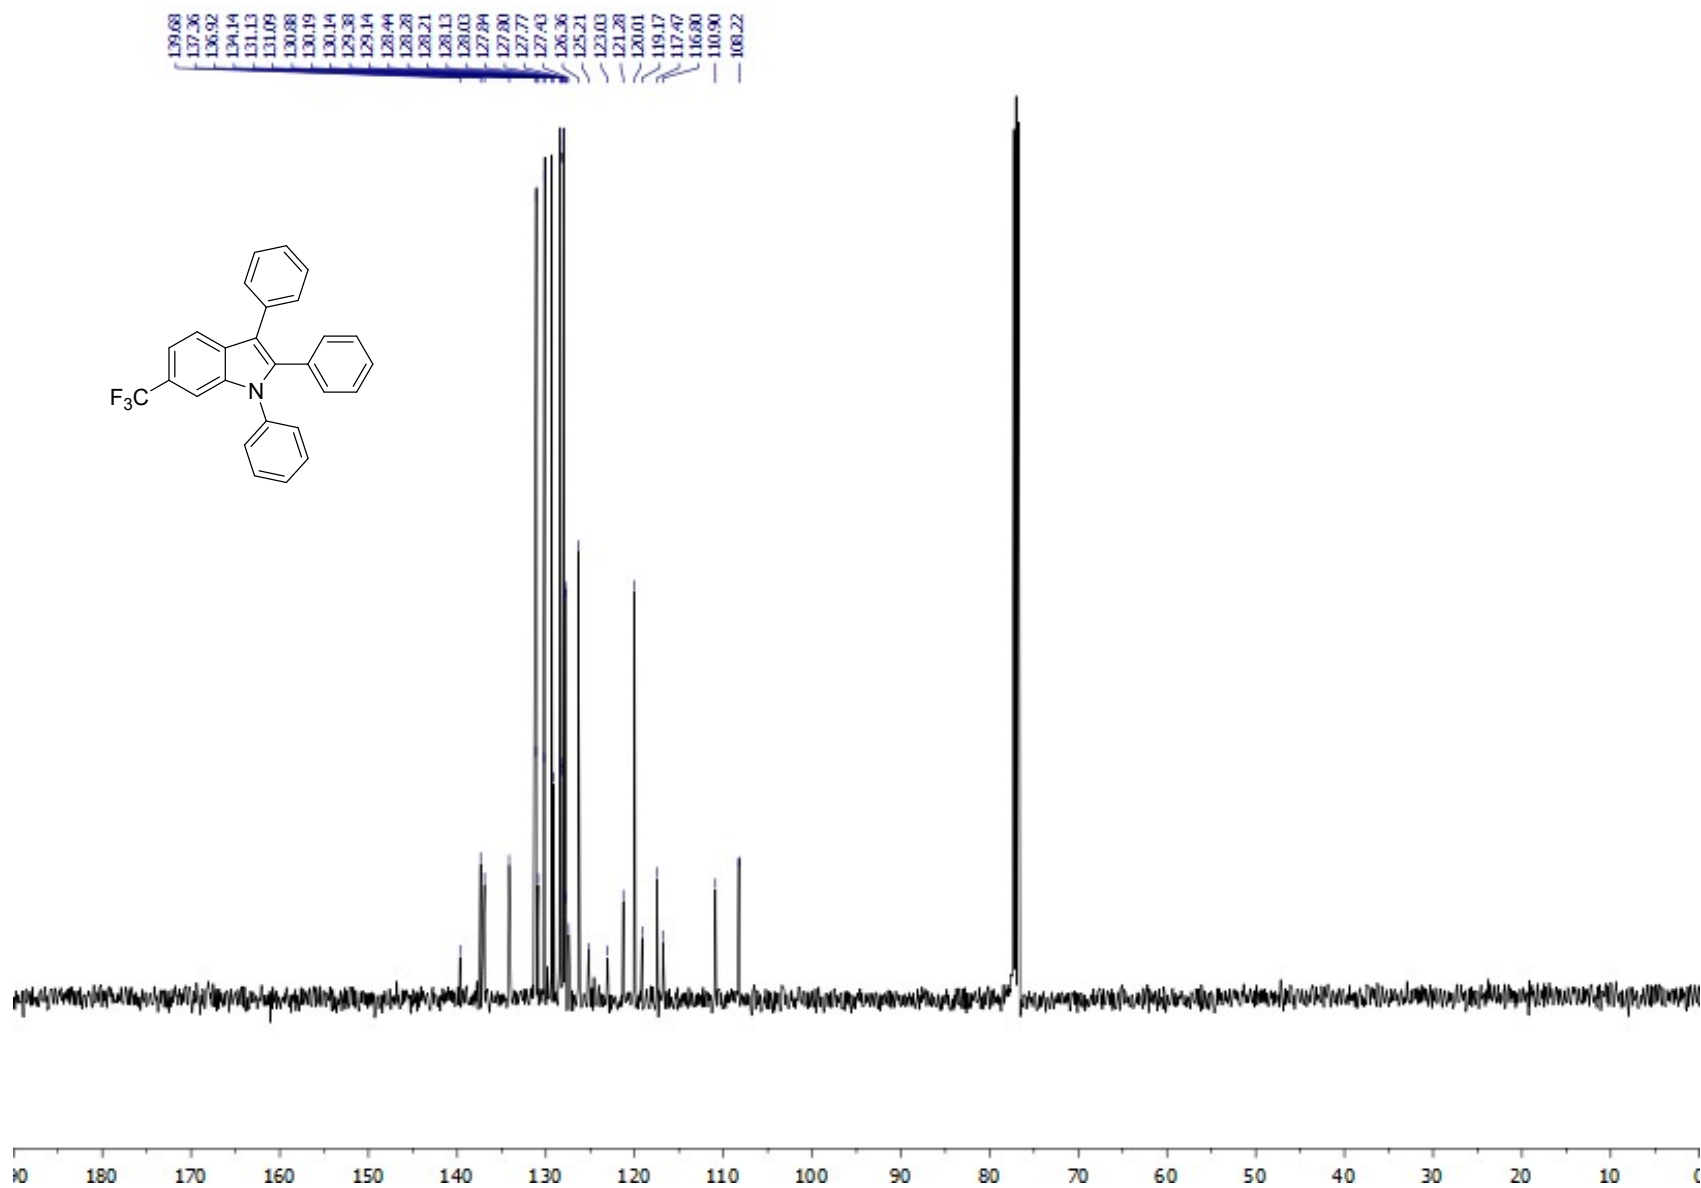

<sup>1</sup>H NMR of Compound 16 (CDCl<sub>3</sub>, 500 MHz)

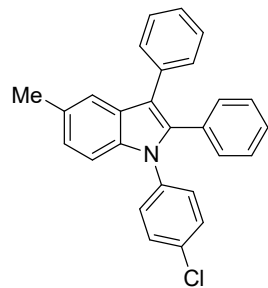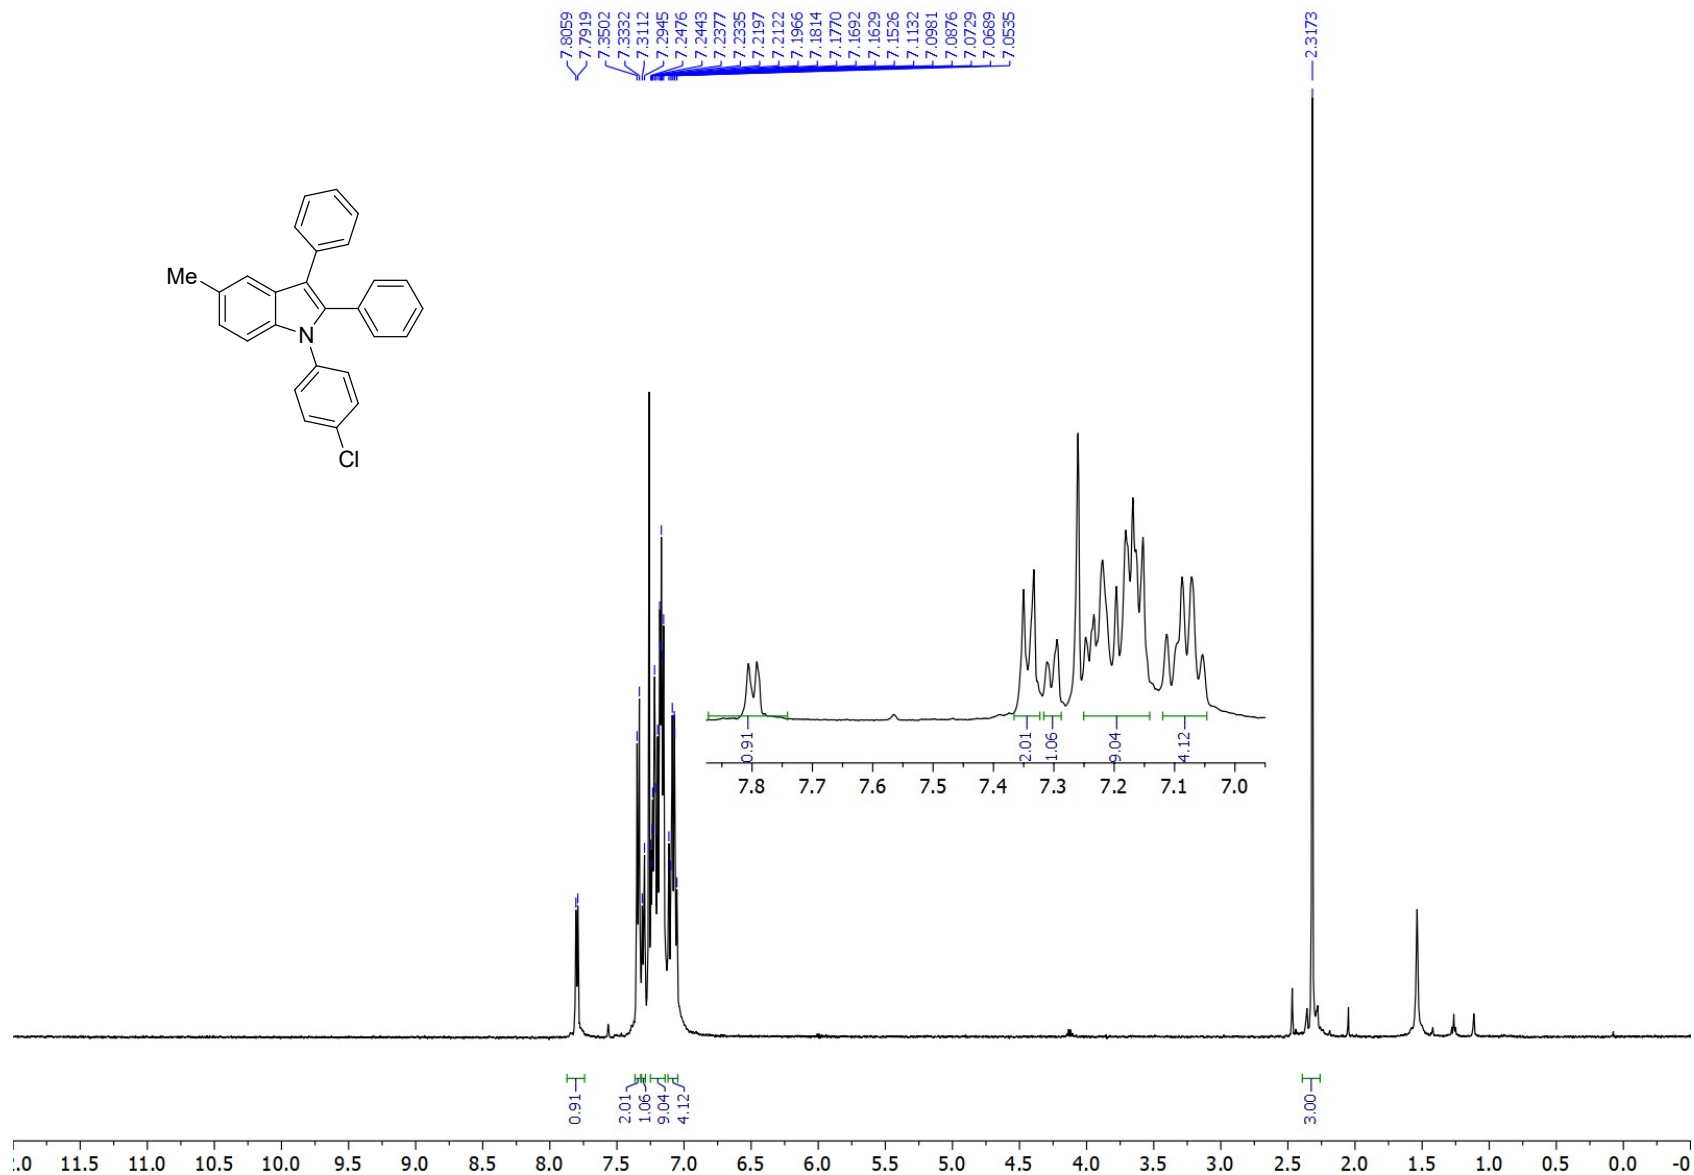

$^{13}\text{C}$  NMR of compound **16** ( $\text{CDCl}_3$ , 125 MHz)

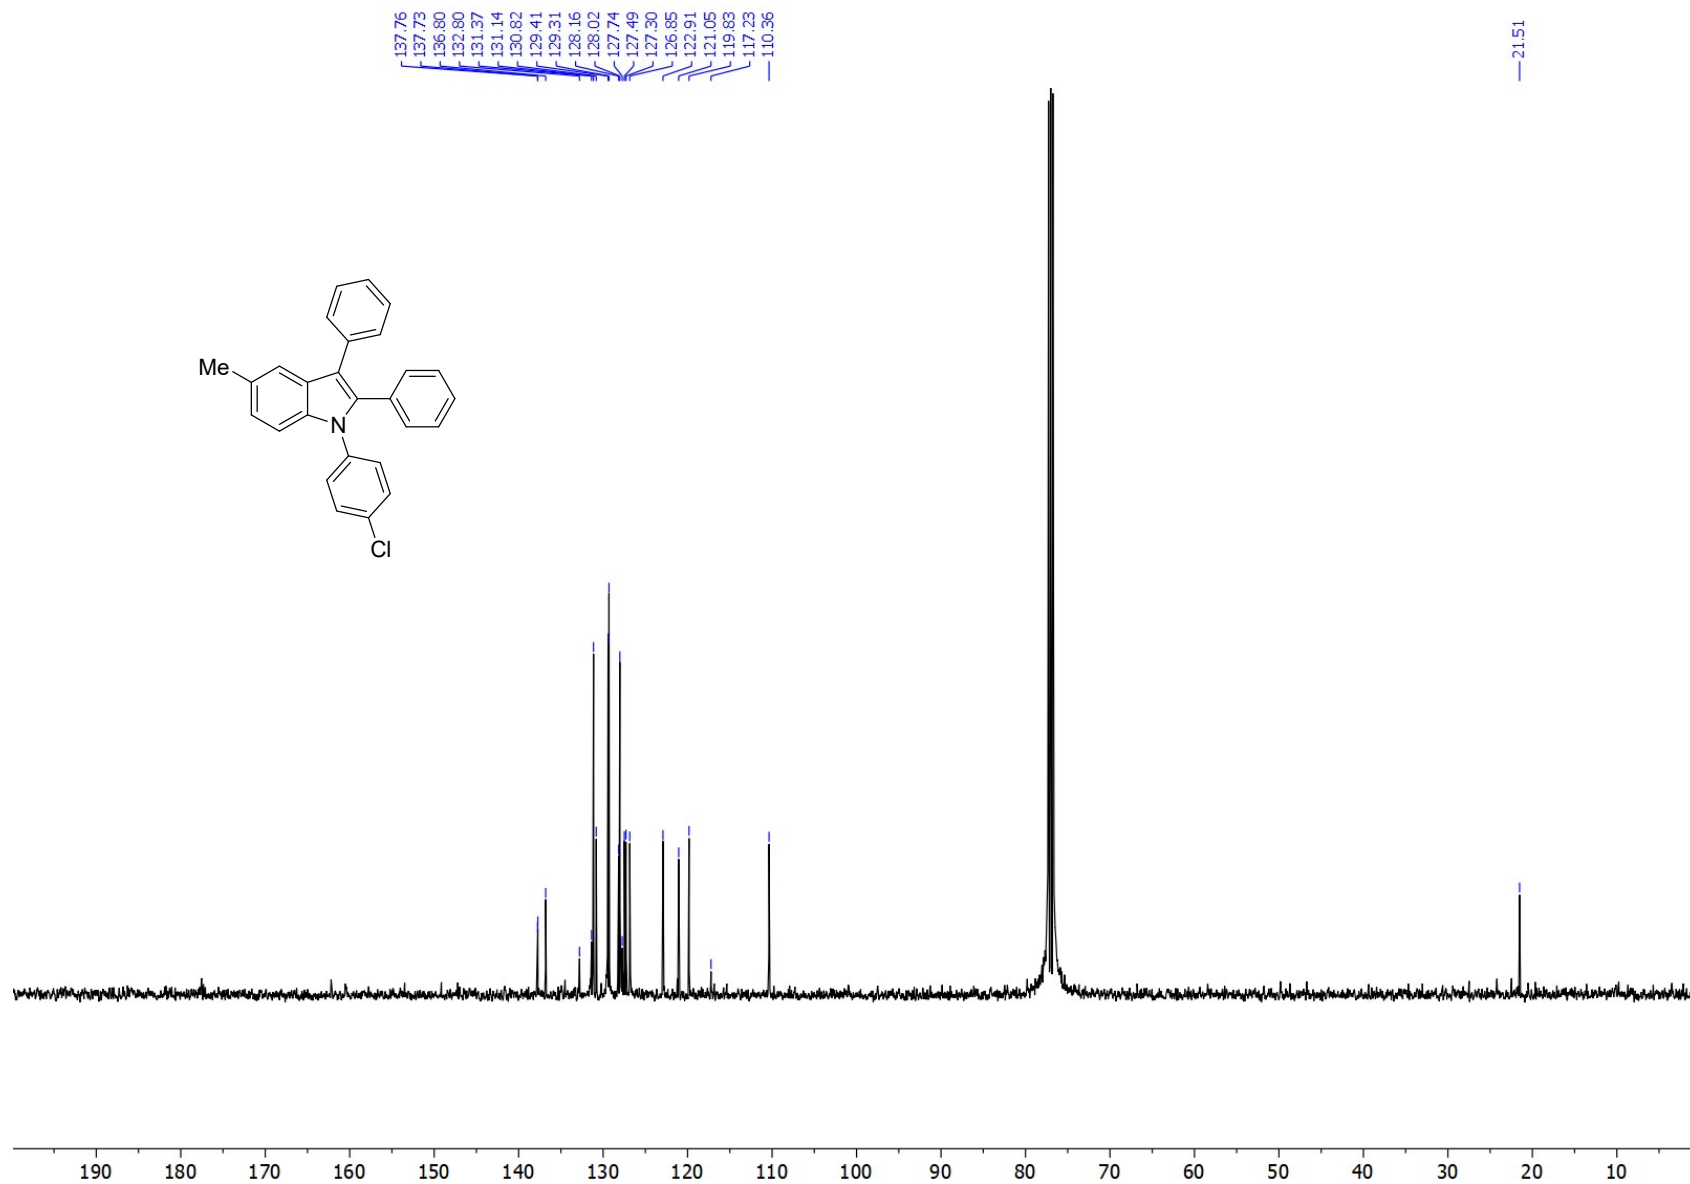

$^1\text{H}$  NMR of Compound **17** ( $\text{CDCl}_3$ , 500 MHz)

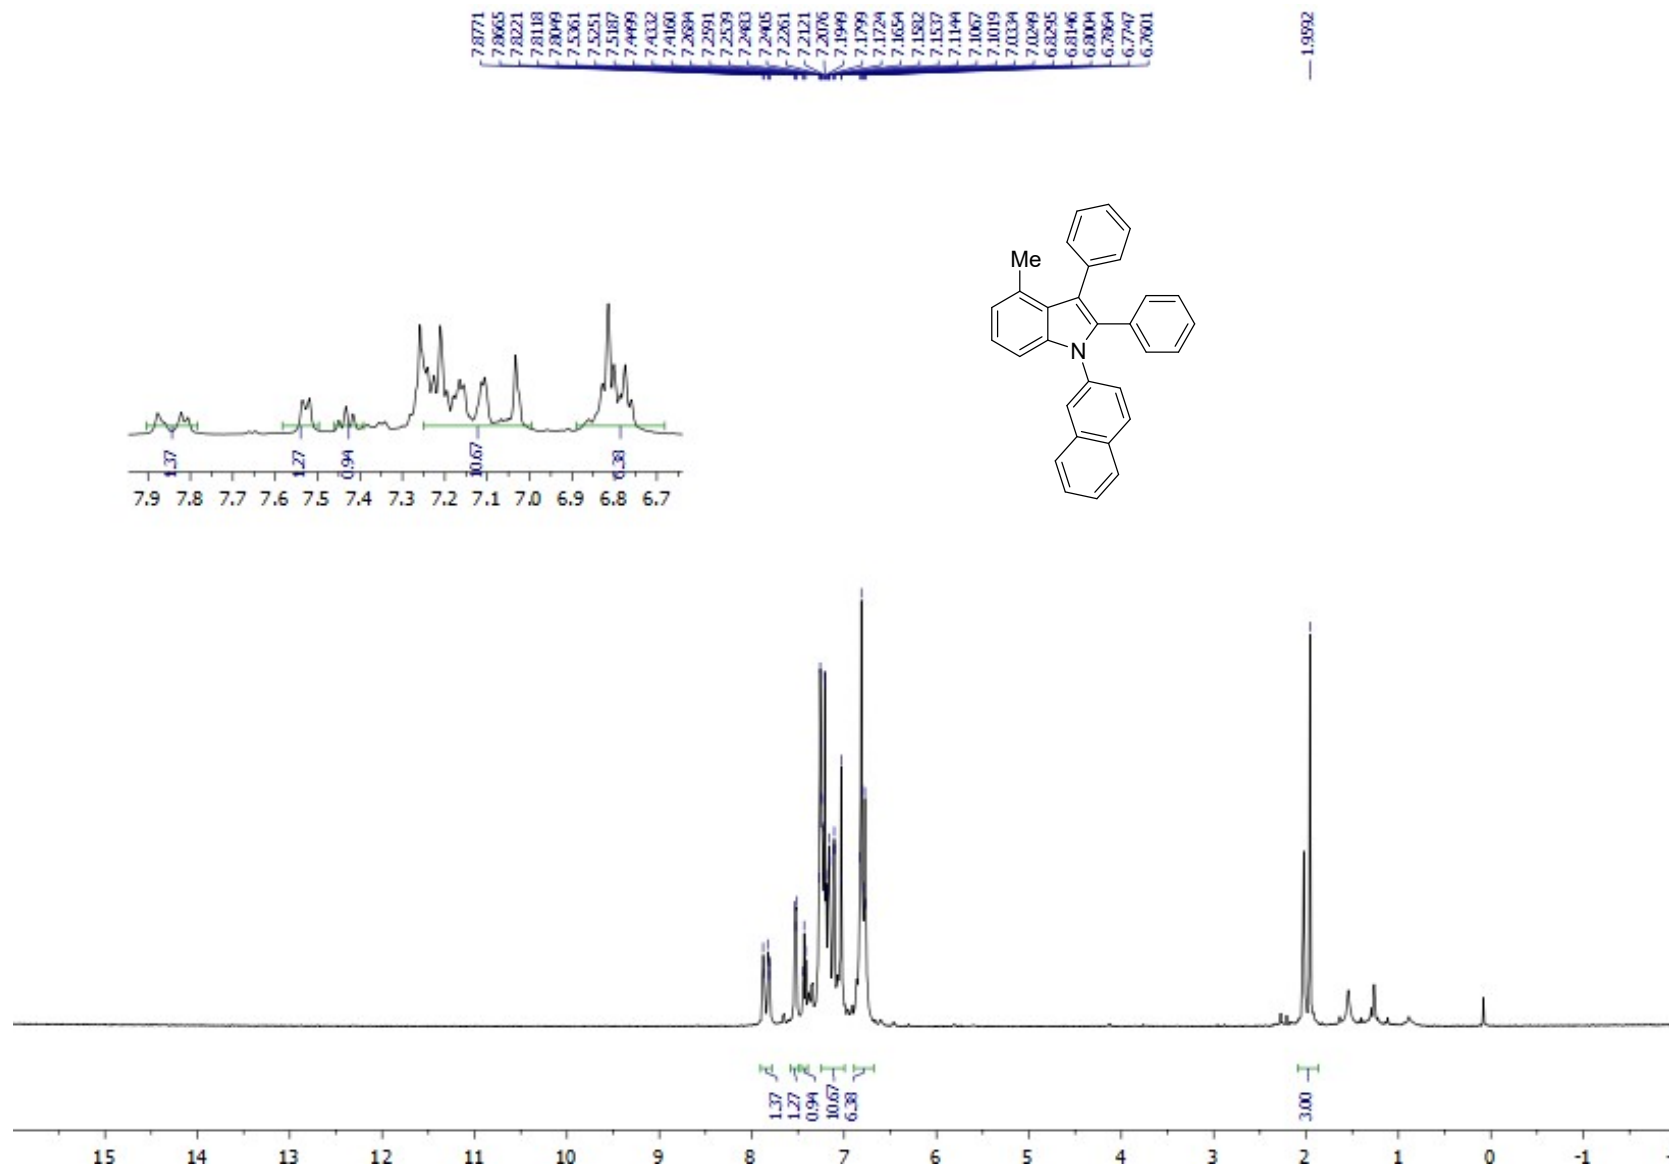

$^{13}\text{C}$  NMR of compound **17** ( $\text{CDCl}_3$ , 125 MHz)

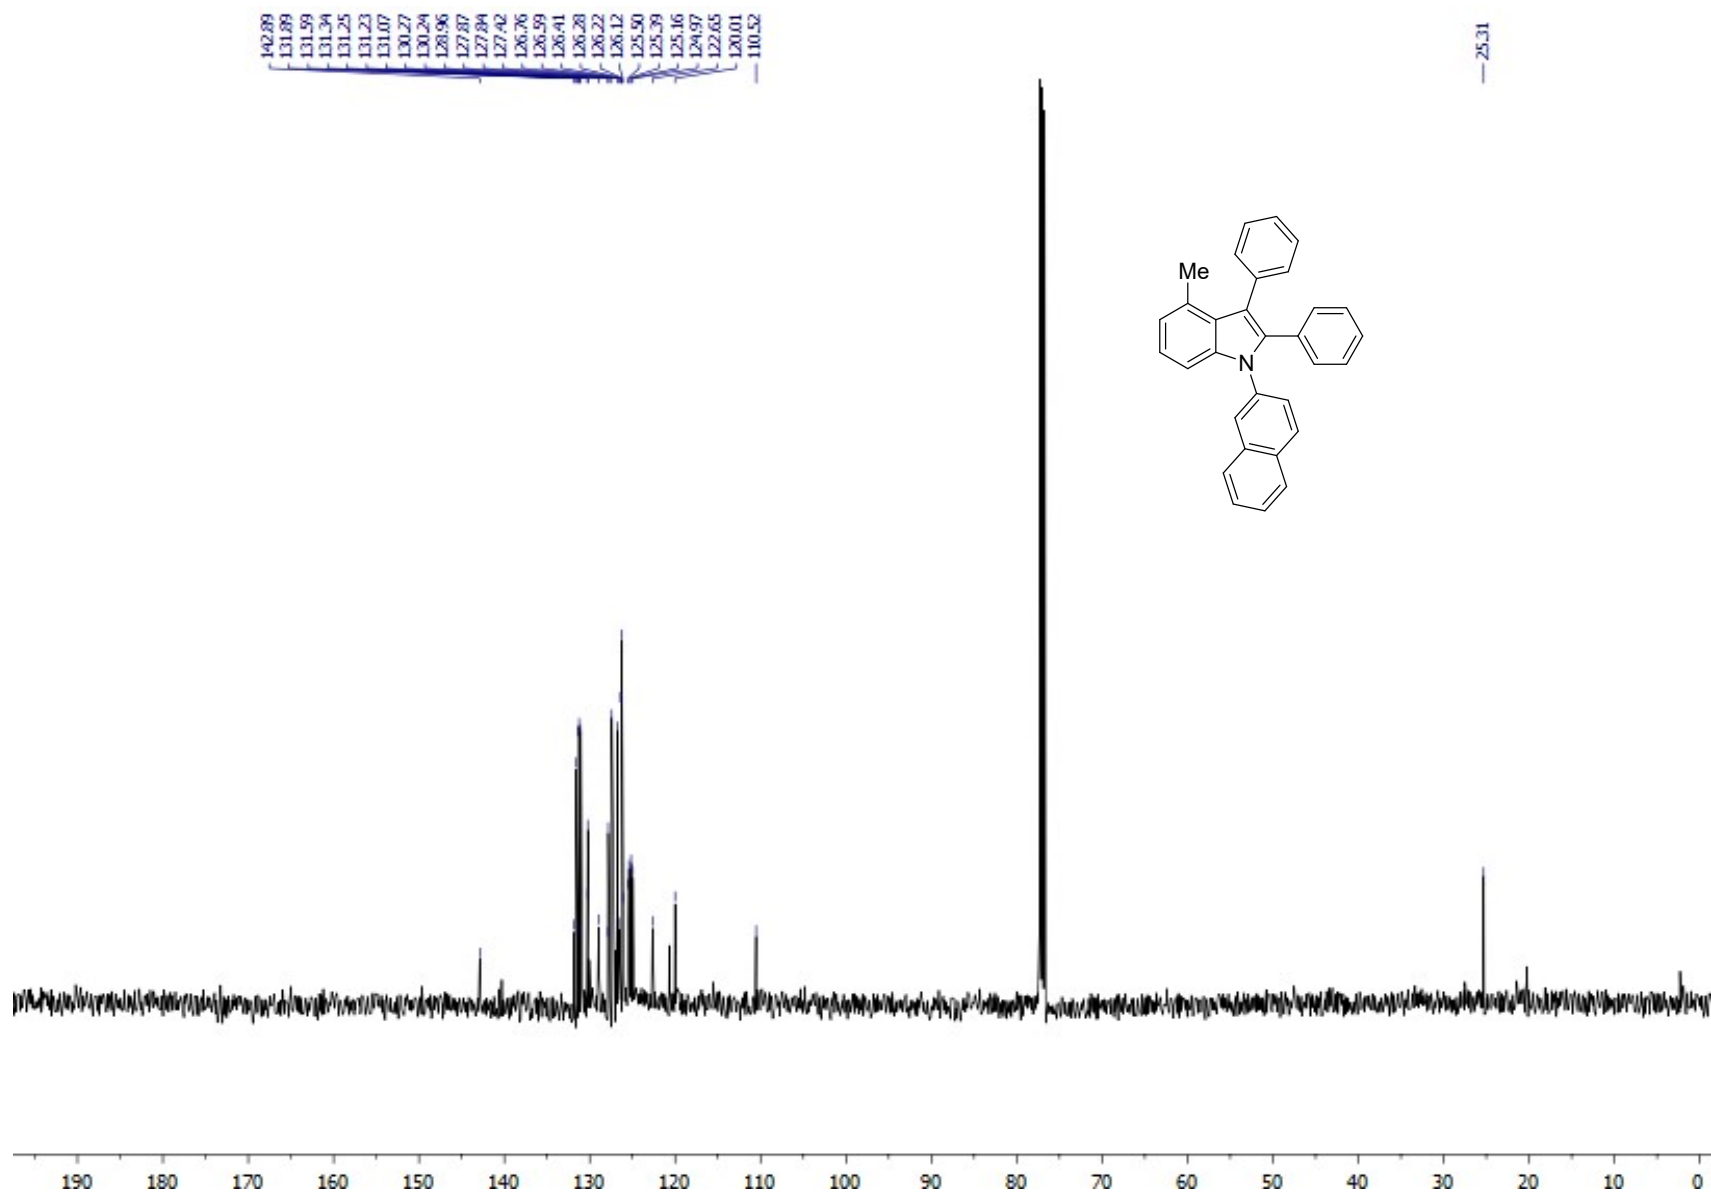

$^1\text{H}$  NMR of Compound **18** ( $\text{CDCl}_3$ , 500 MHz)

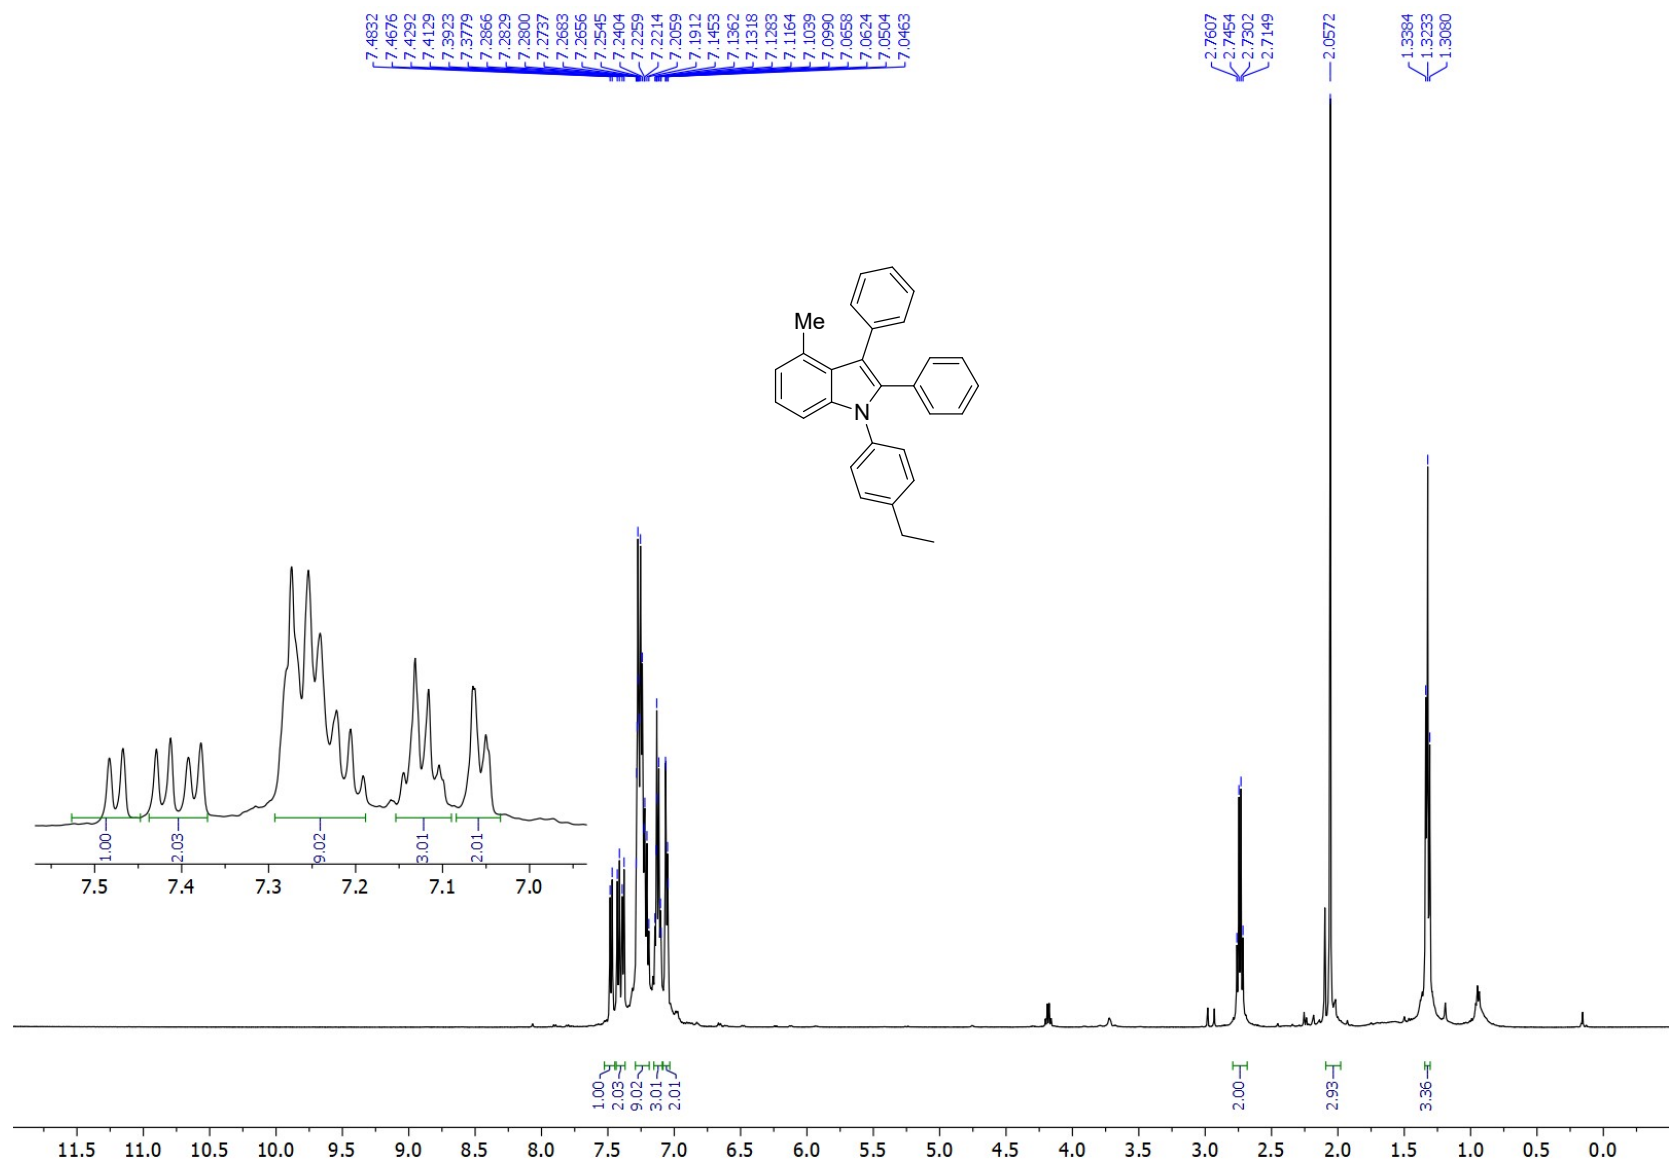

$^{13}\text{C}$  NMR of compound **18** ( $\text{CDCl}_3$ , 125 MHz)

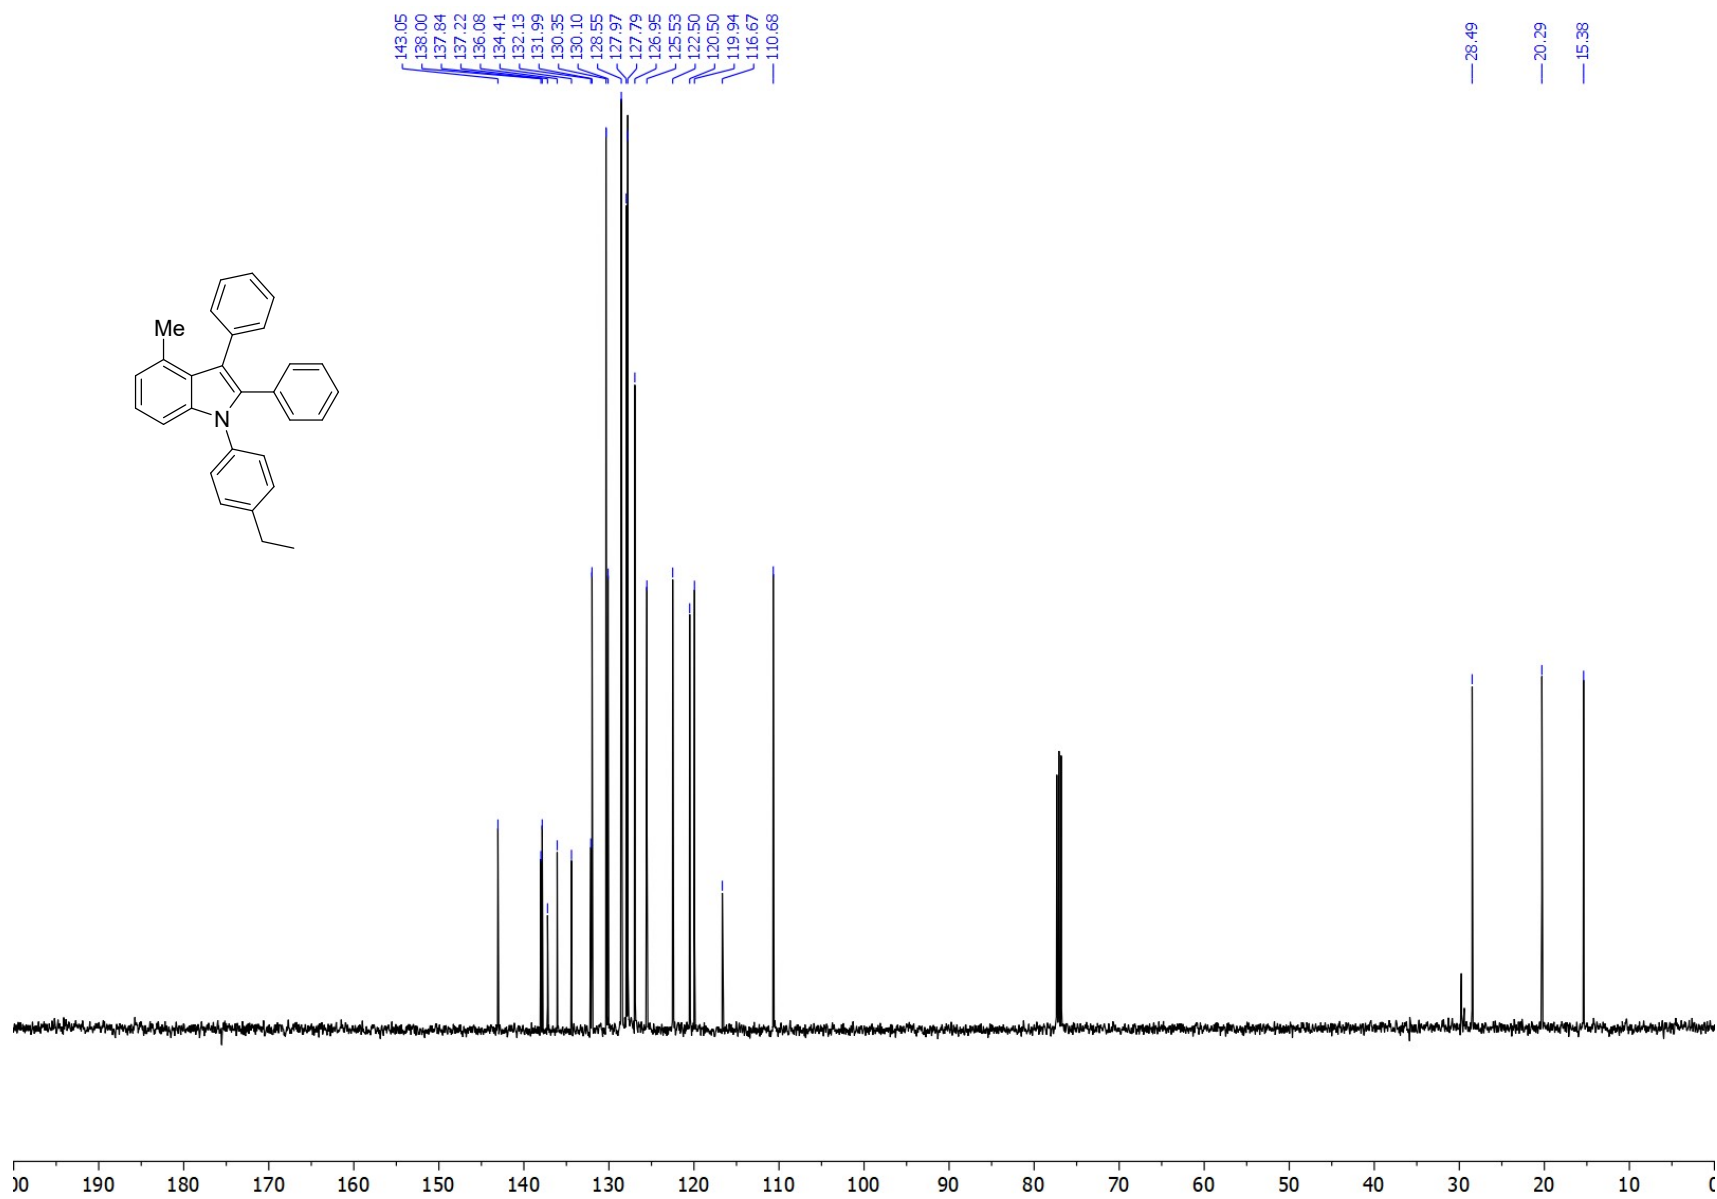

$^1\text{H}$  NMR of Compound **19** ( $\text{CDCl}_3$ , 500 MHz)

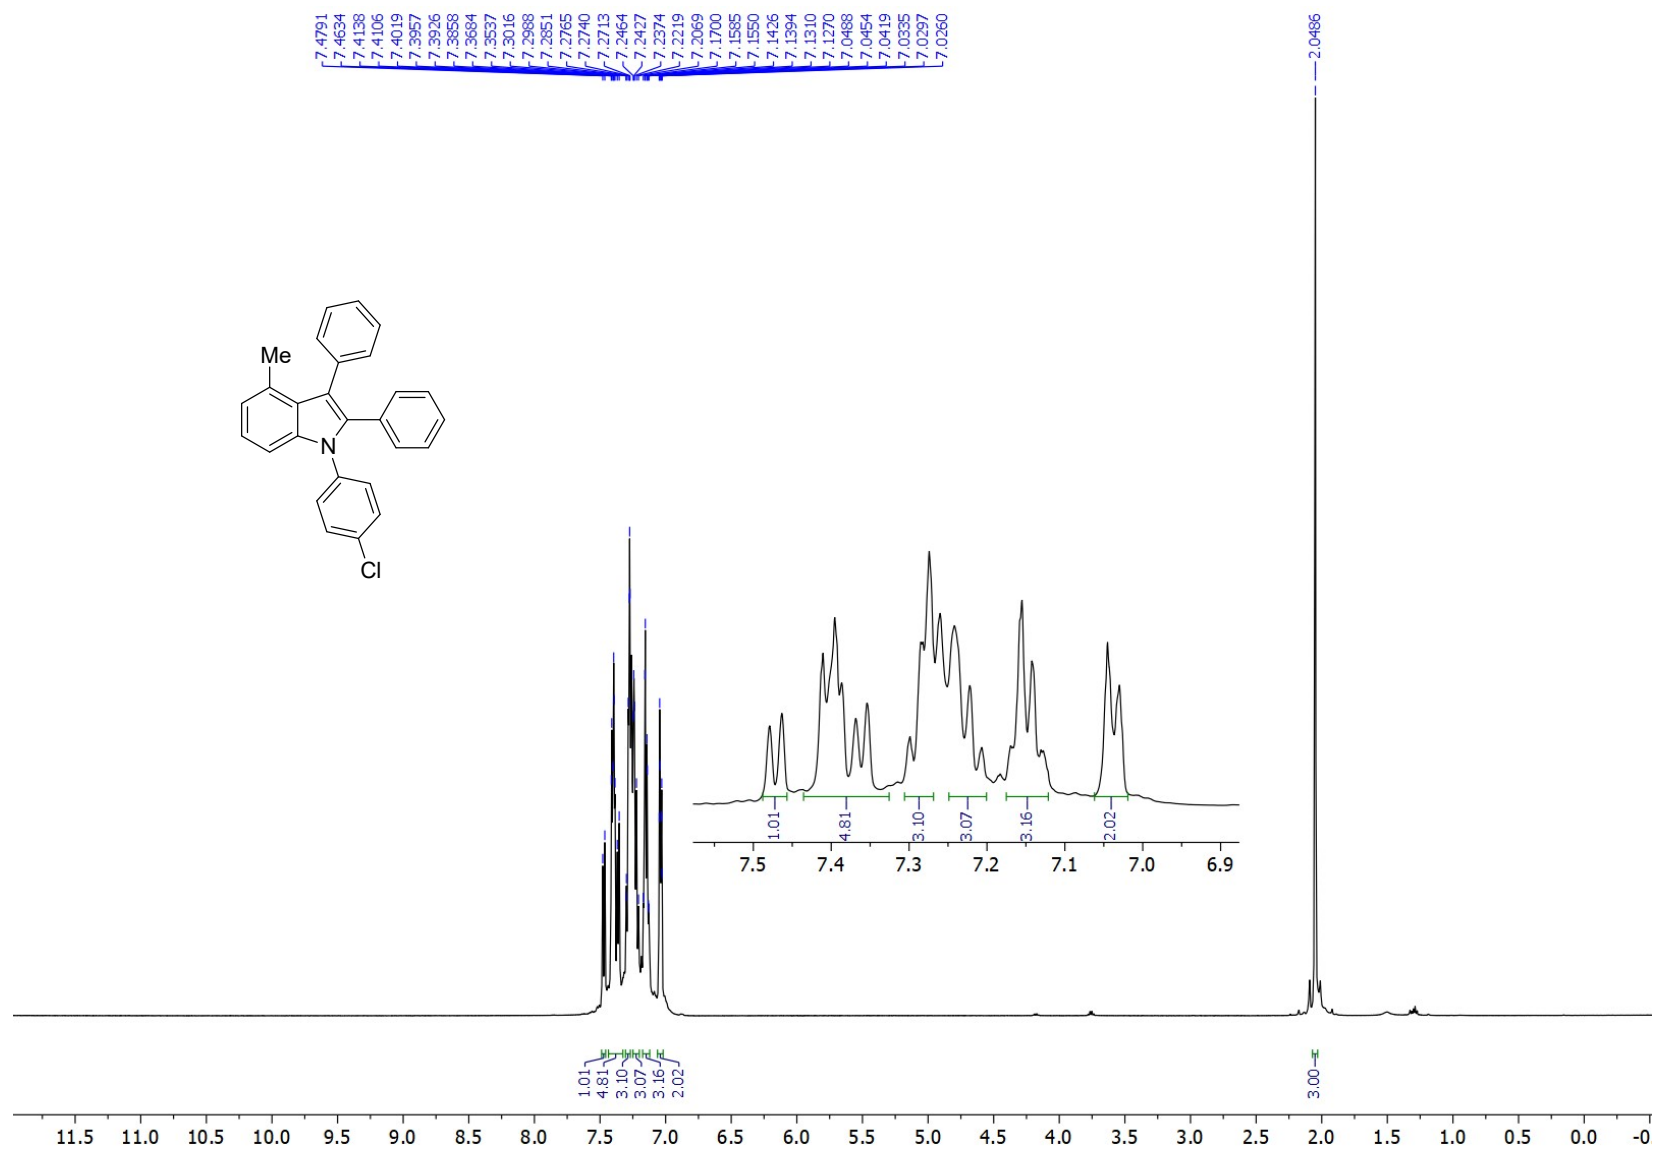



$^{13}\text{C}$  NMR of compound **19** ( $\text{CDCl}_3$ , 125 MHz)

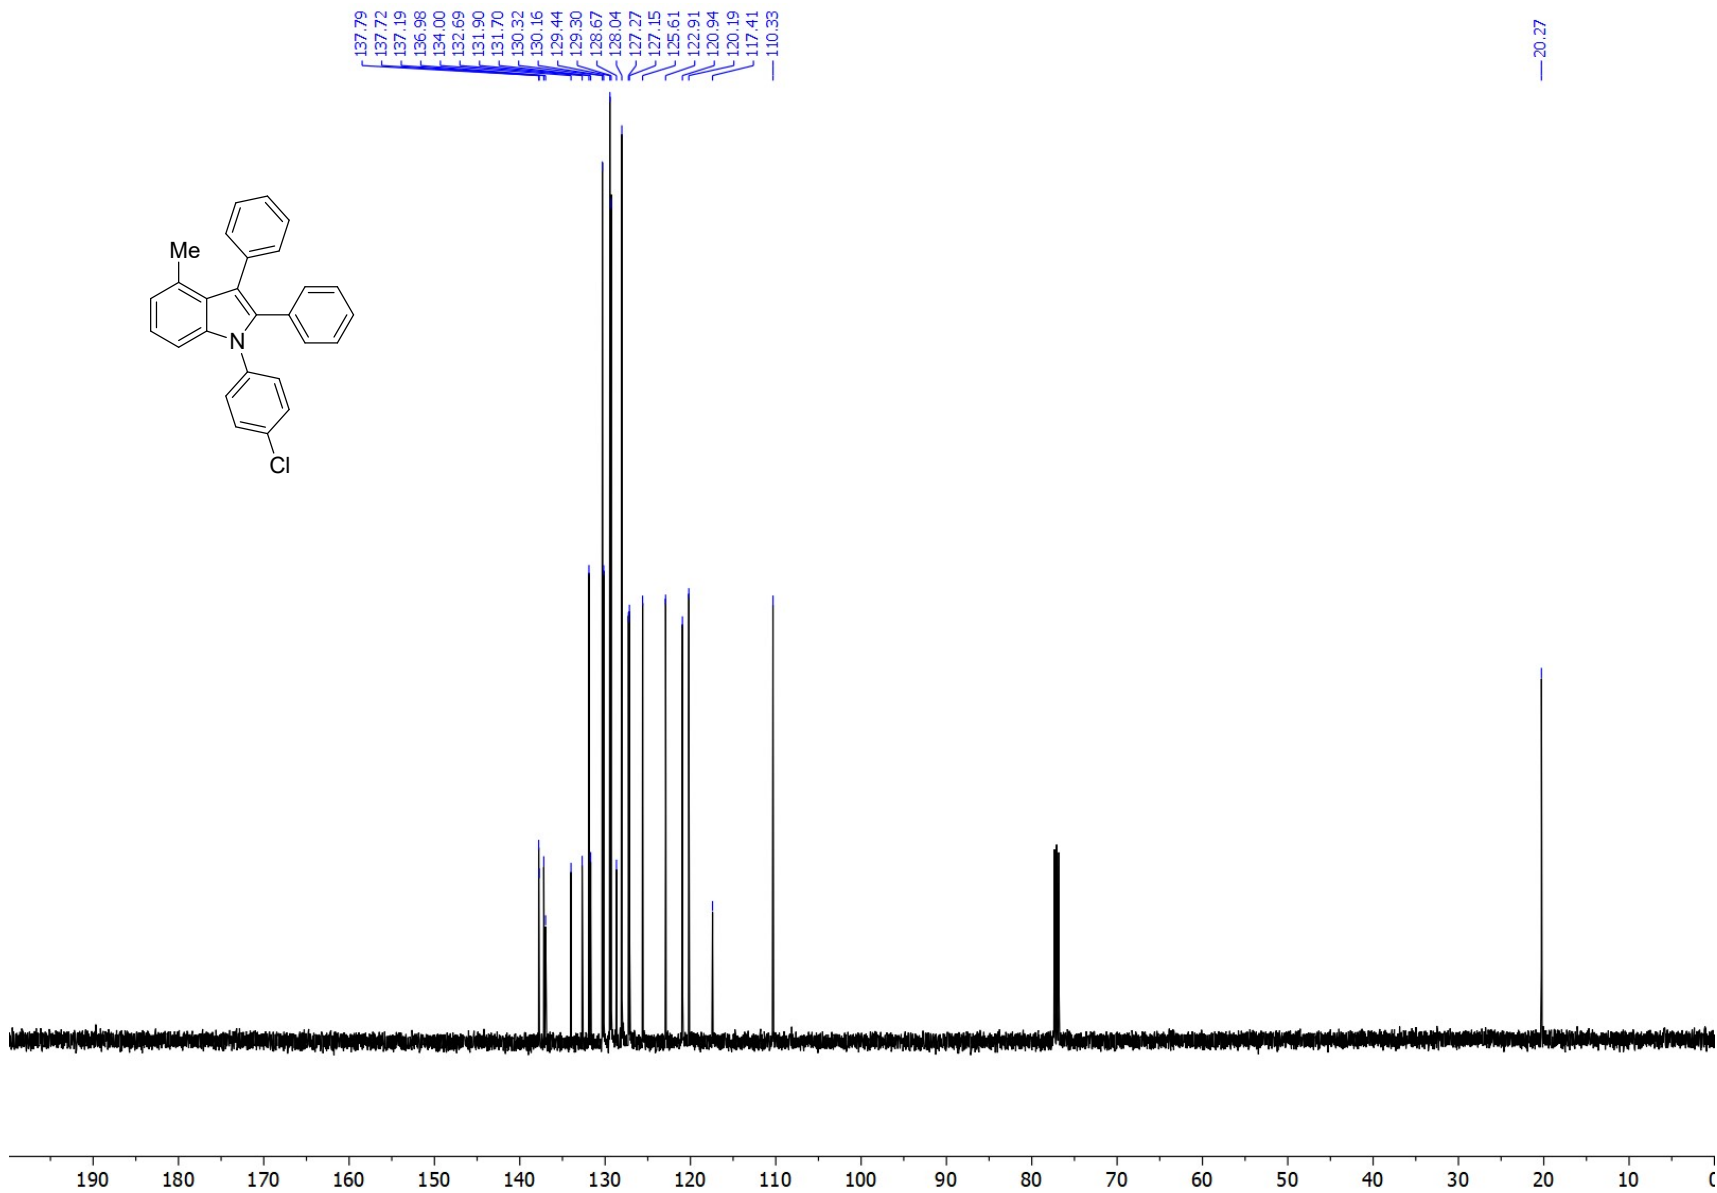

<sup>1</sup>H NMR of Compound **20** (CDCl<sub>3</sub>, 500 MHz)

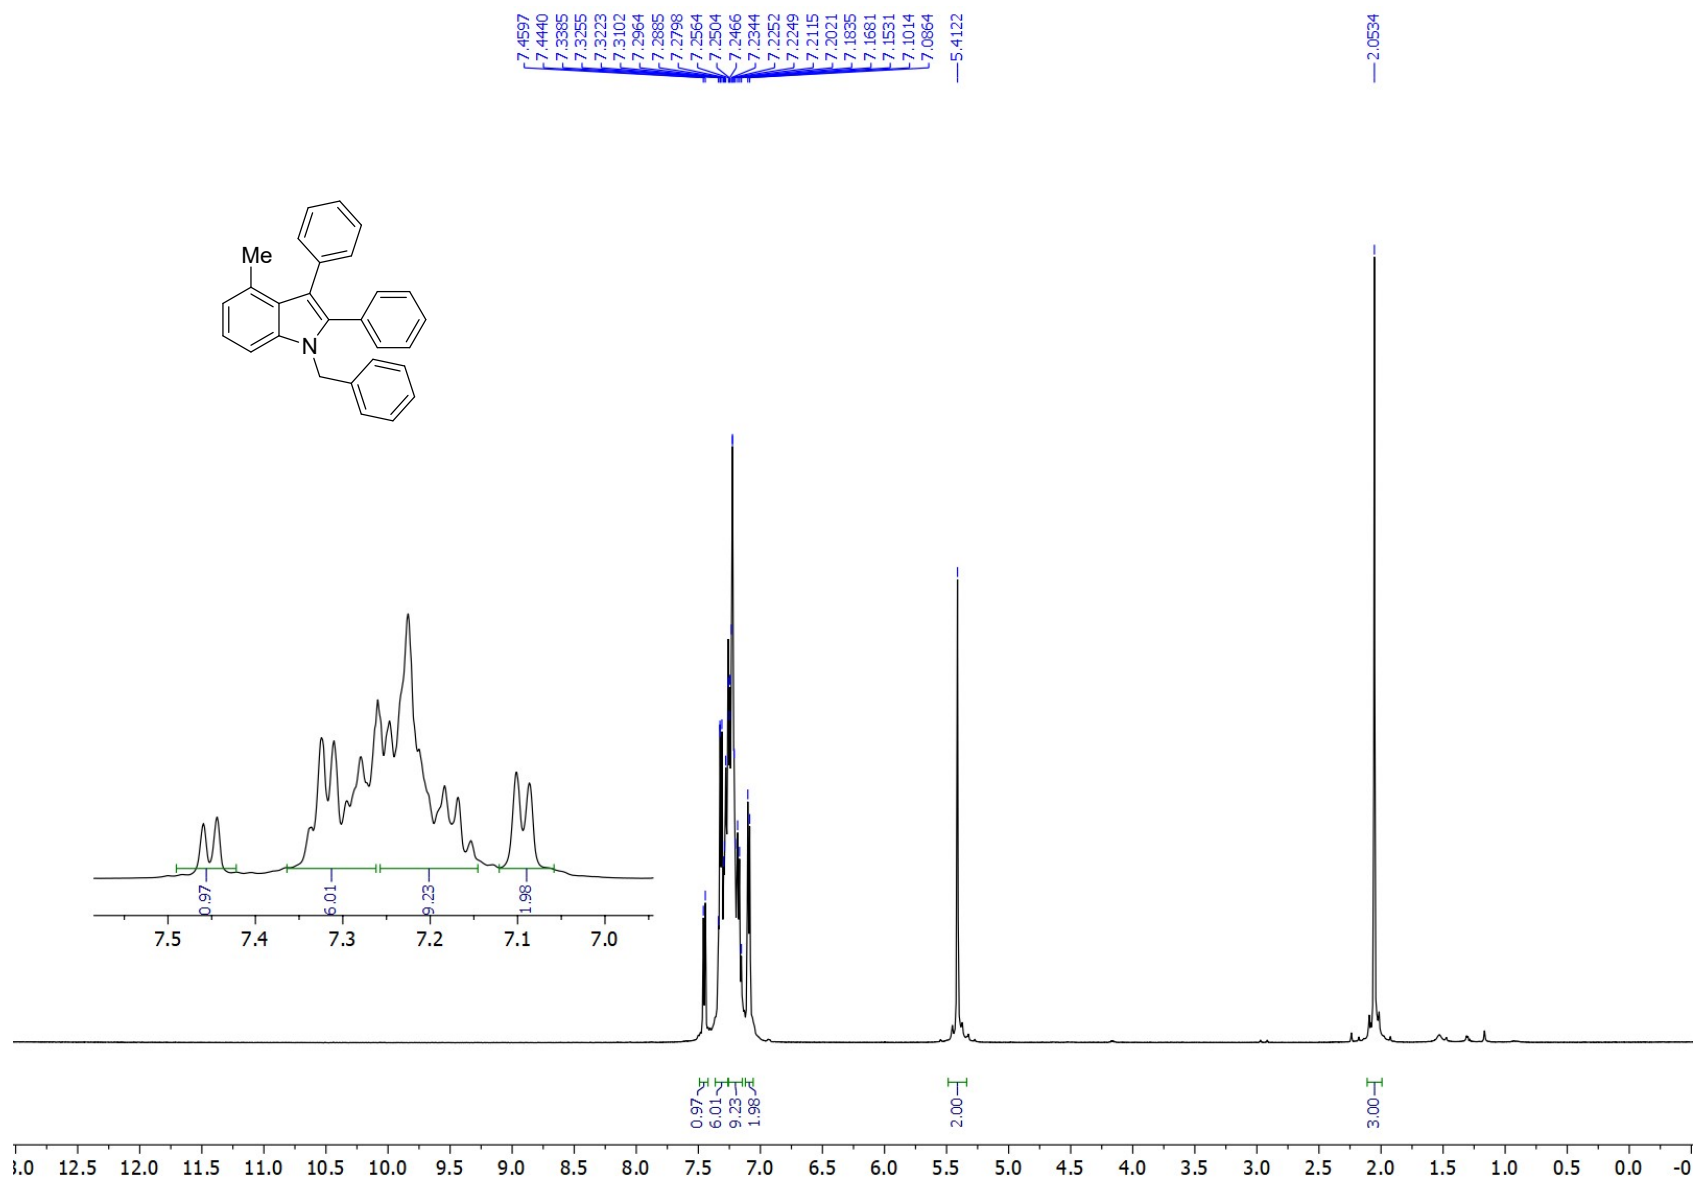

$^{13}\text{C}$  NMR of compound **20** ( $\text{CDCl}_3$ , 125 MHz)

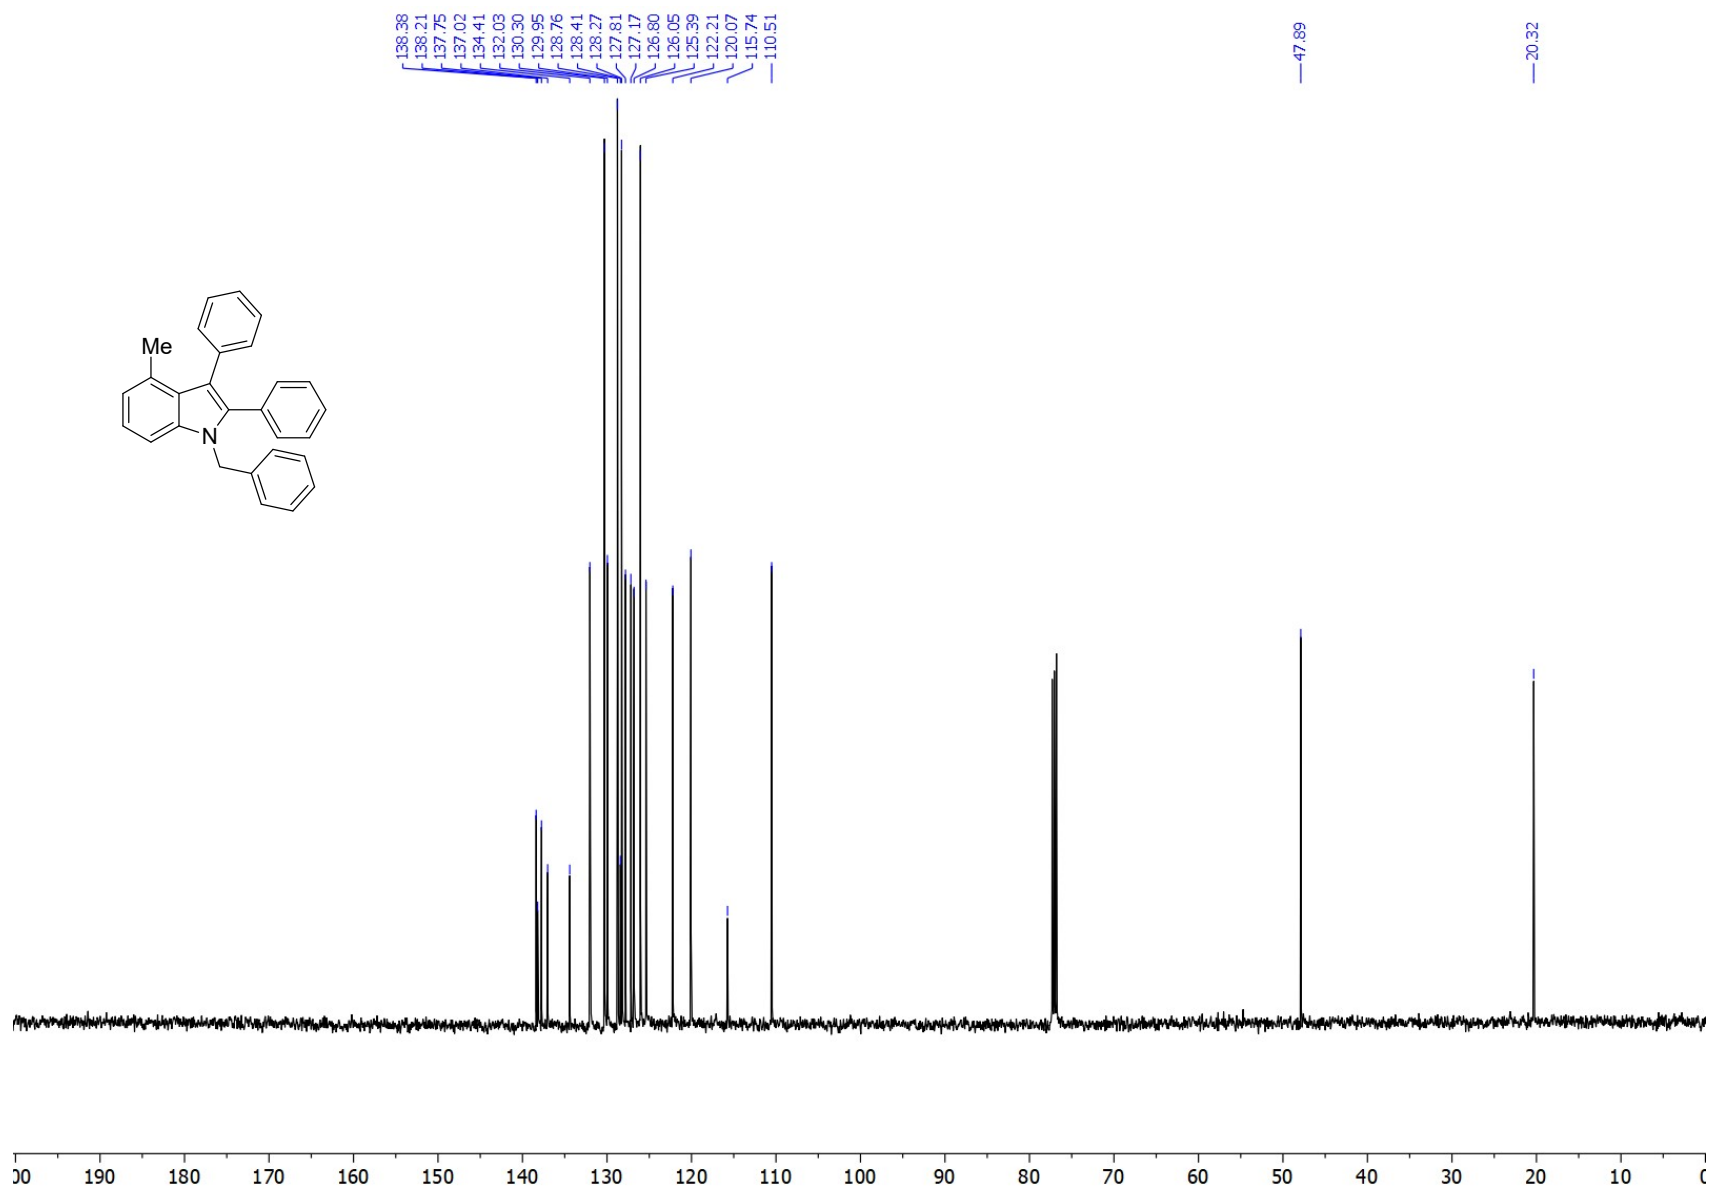

<sup>1</sup>H NMR of Compound **21** (CDCl<sub>3</sub>, 500 MHz)

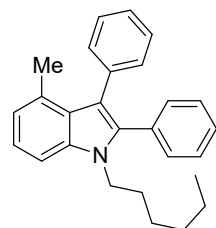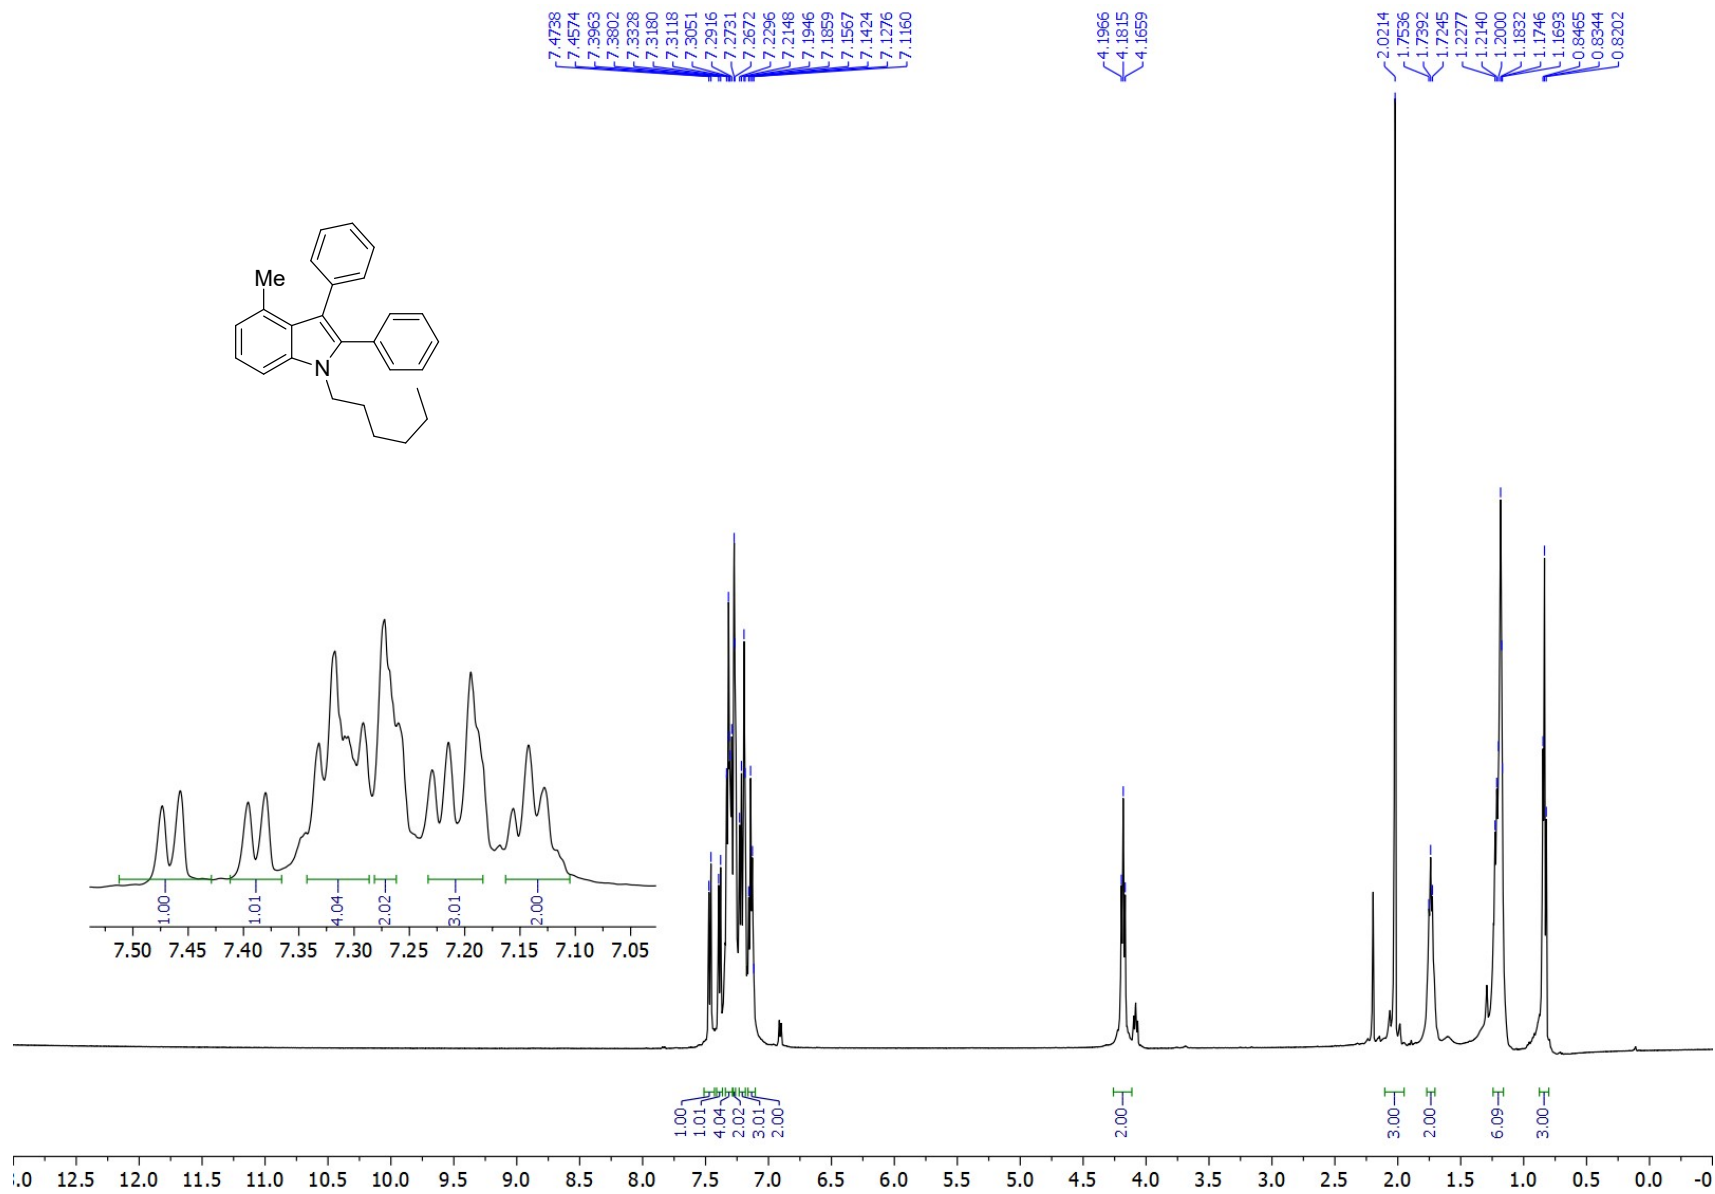

$^{13}\text{C}$  NMR of compound **21** ( $\text{CDCl}_3$ , 125 MHz)

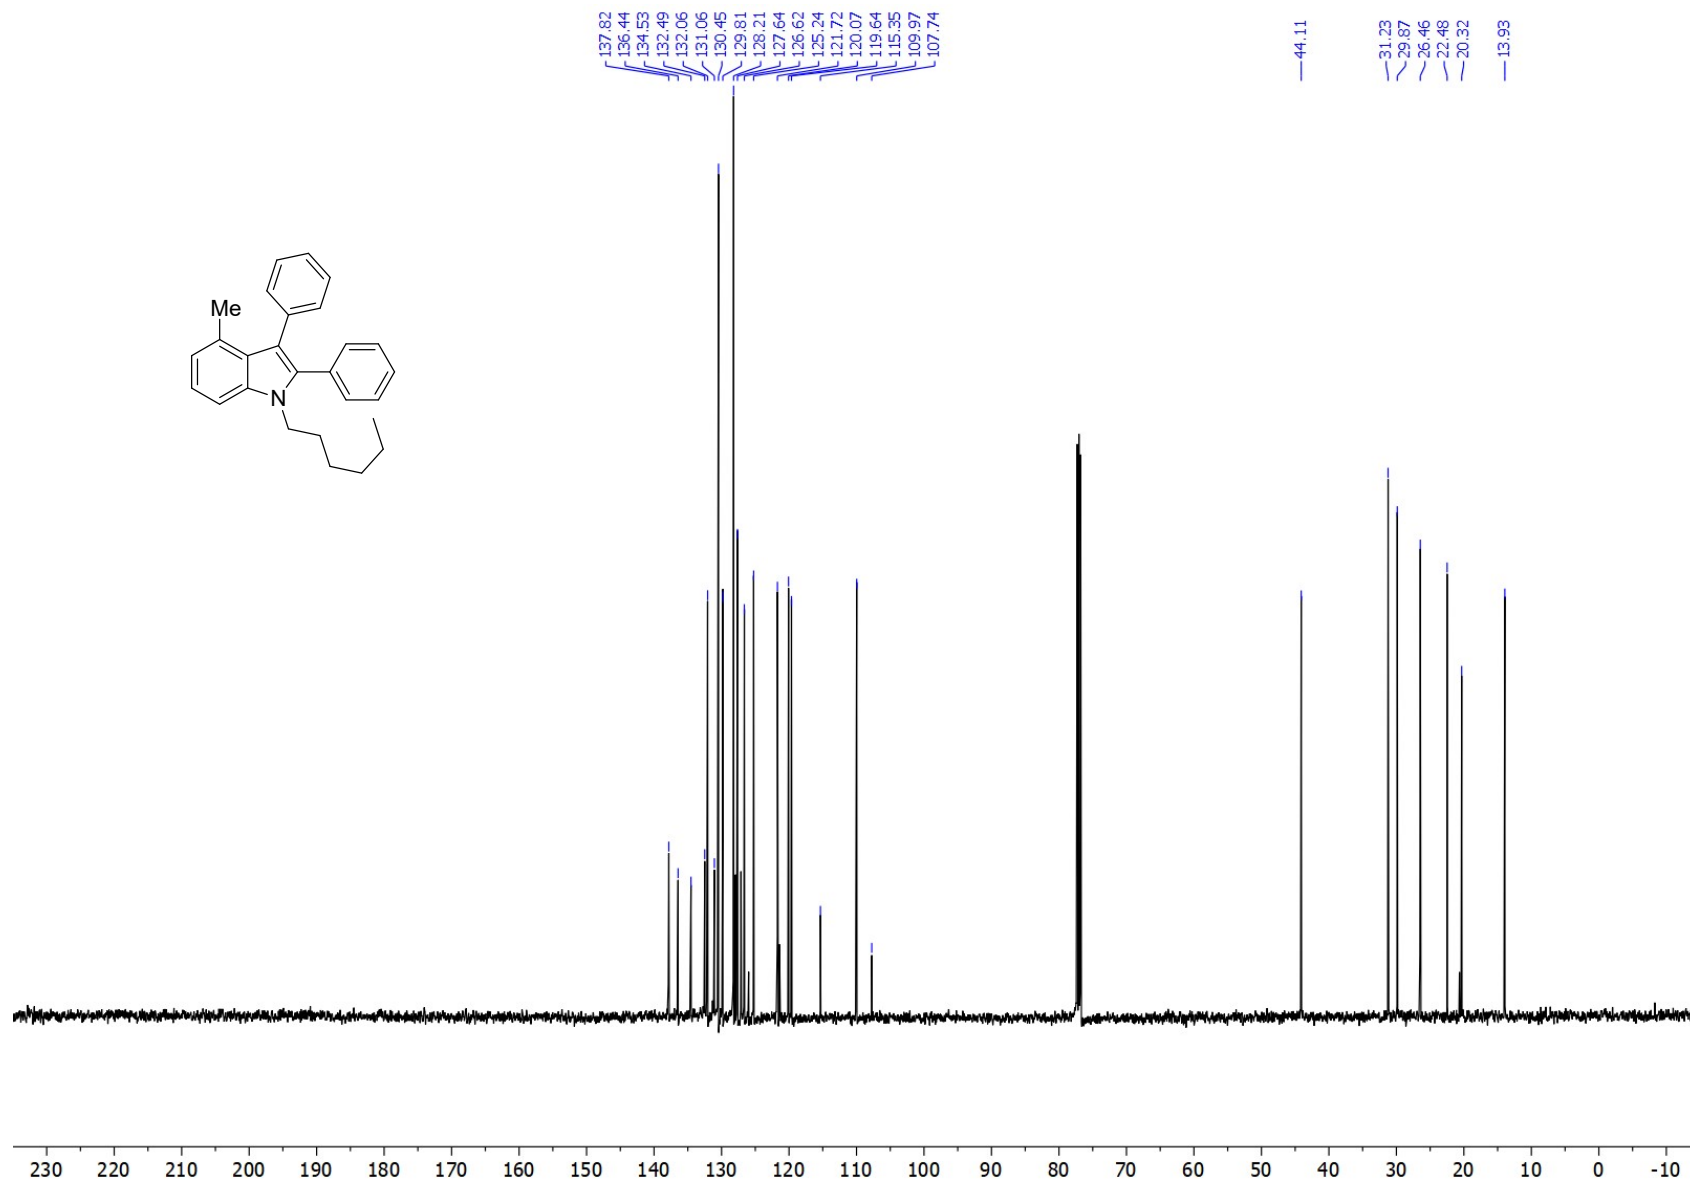

<sup>1</sup>H NMR of Compound **22** (CDCl<sub>3</sub>, 500 MHz)

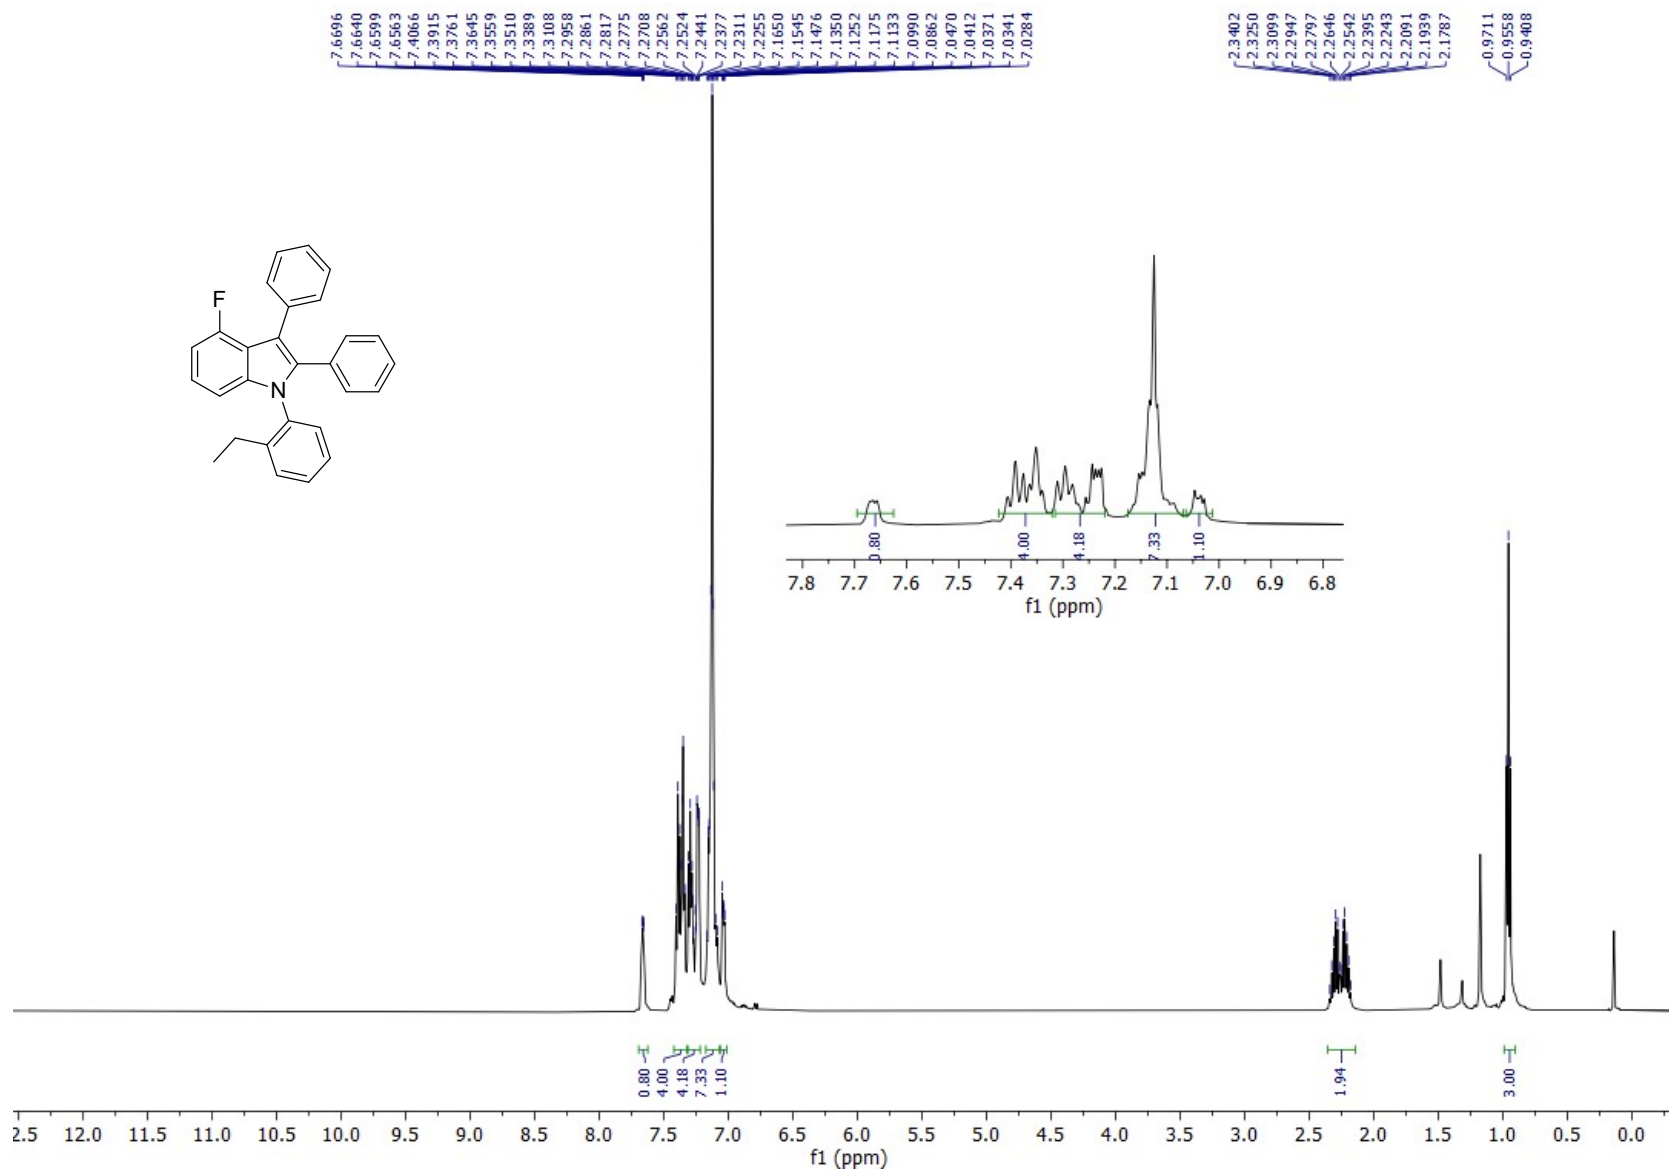

$^{13}\text{C}$  NMR of compound **22** ( $\text{CDCl}_3$ , 125 MHz)

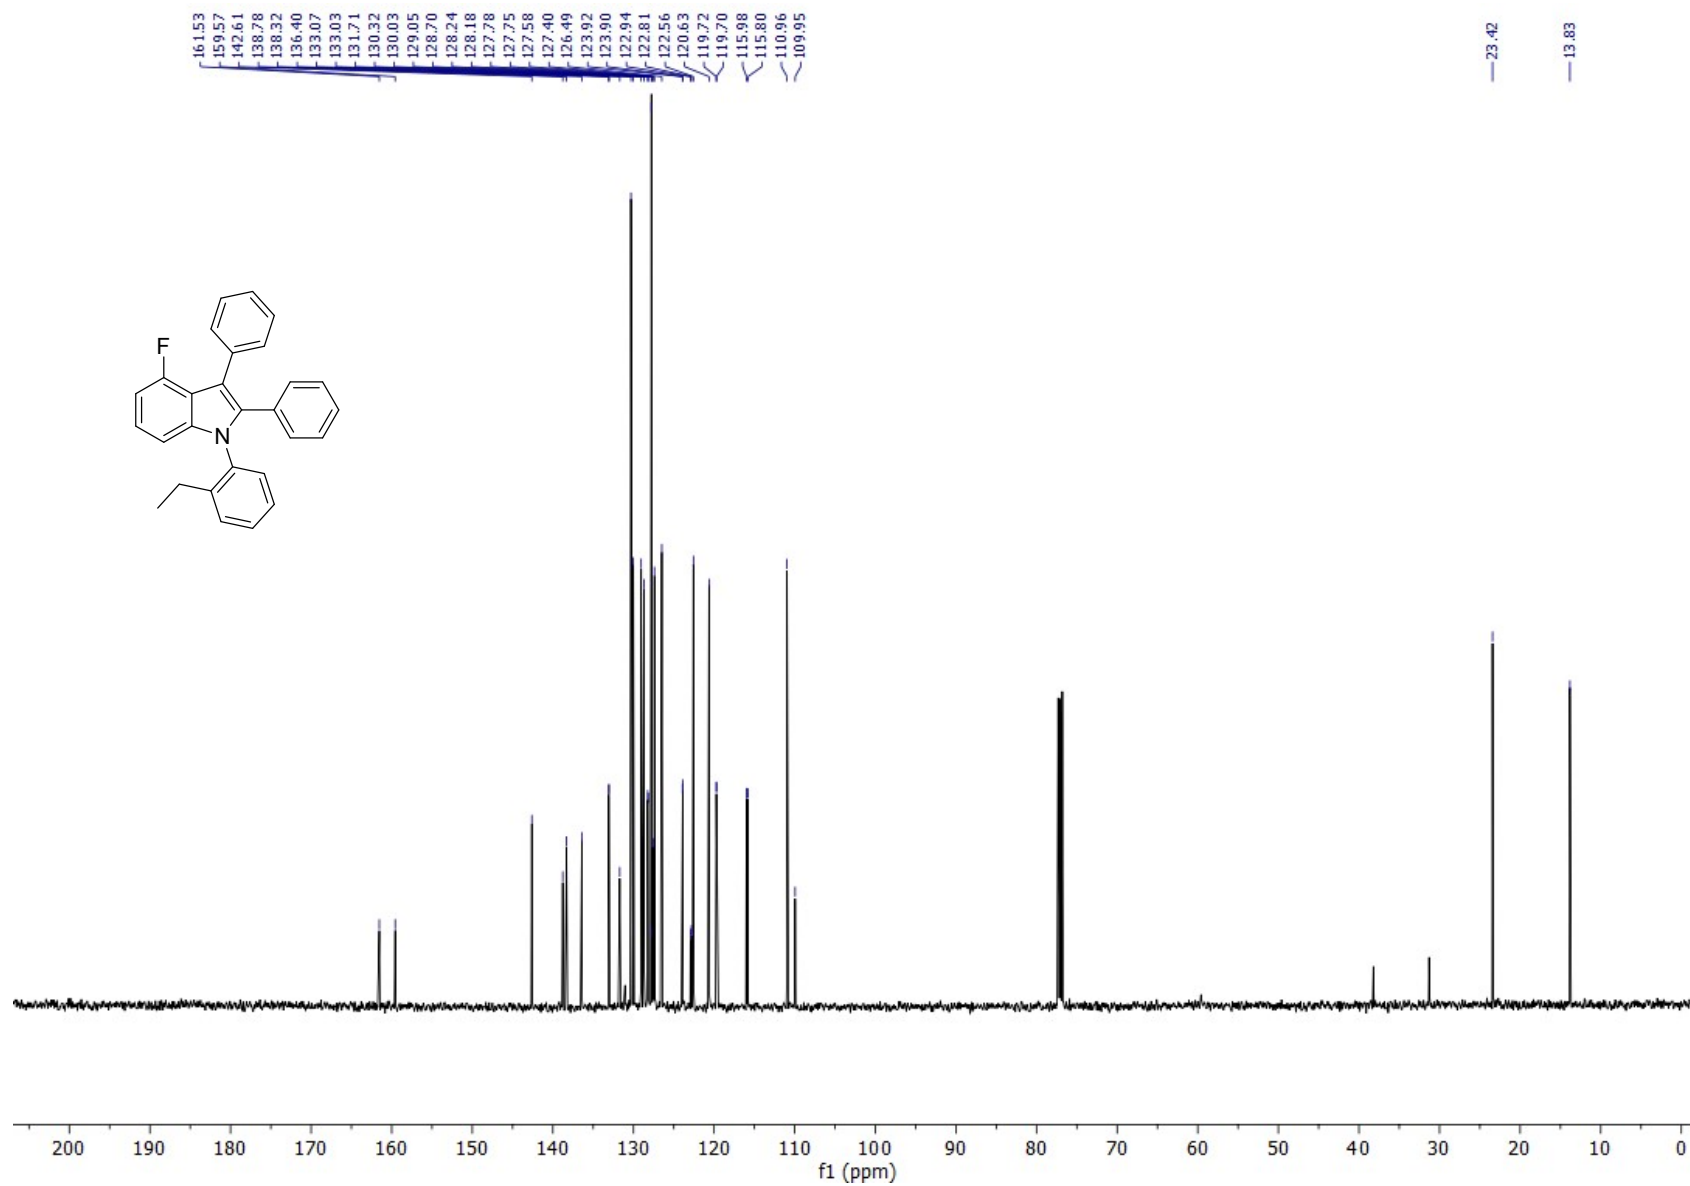

<sup>1</sup>H NMR of Compound **23** (CDCl<sub>3</sub>, 500 MHz)

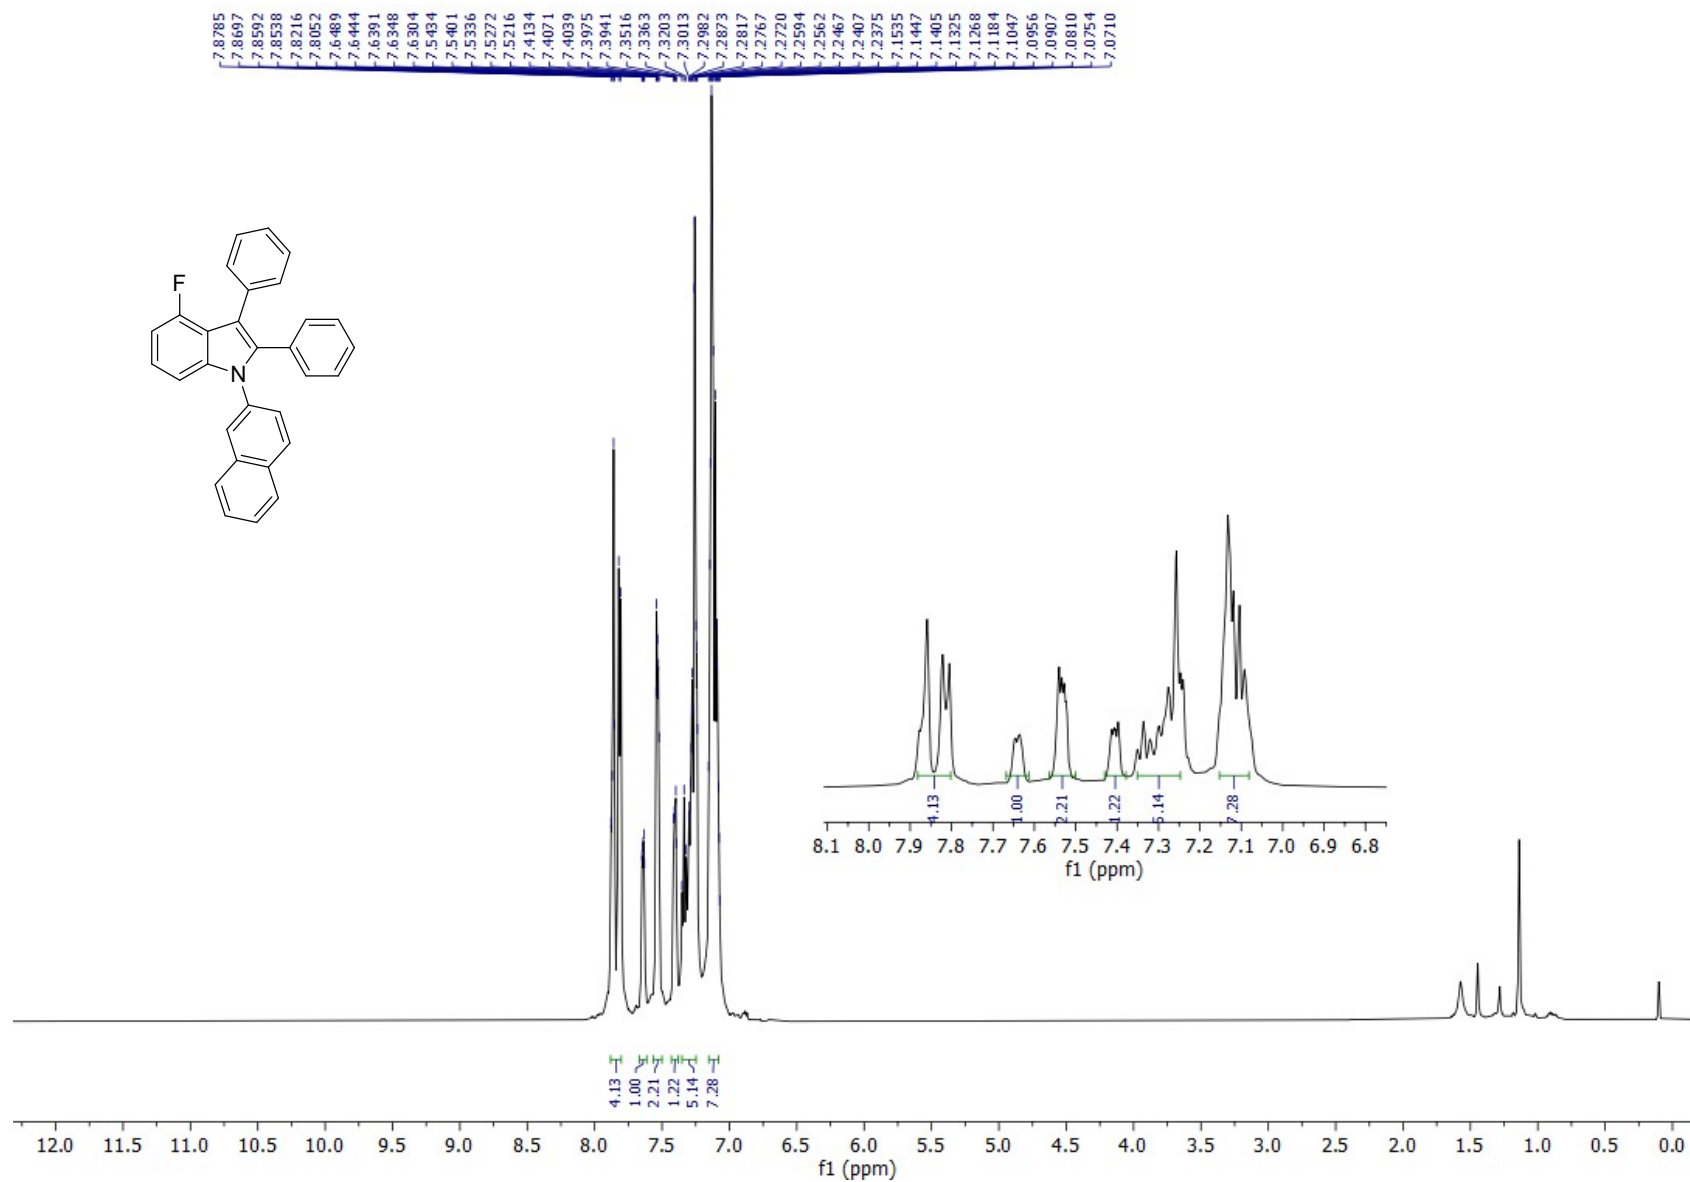



$^{13}\text{C}$  NMR of compound **23** ( $\text{CDCl}_3$ , 125 MHz)

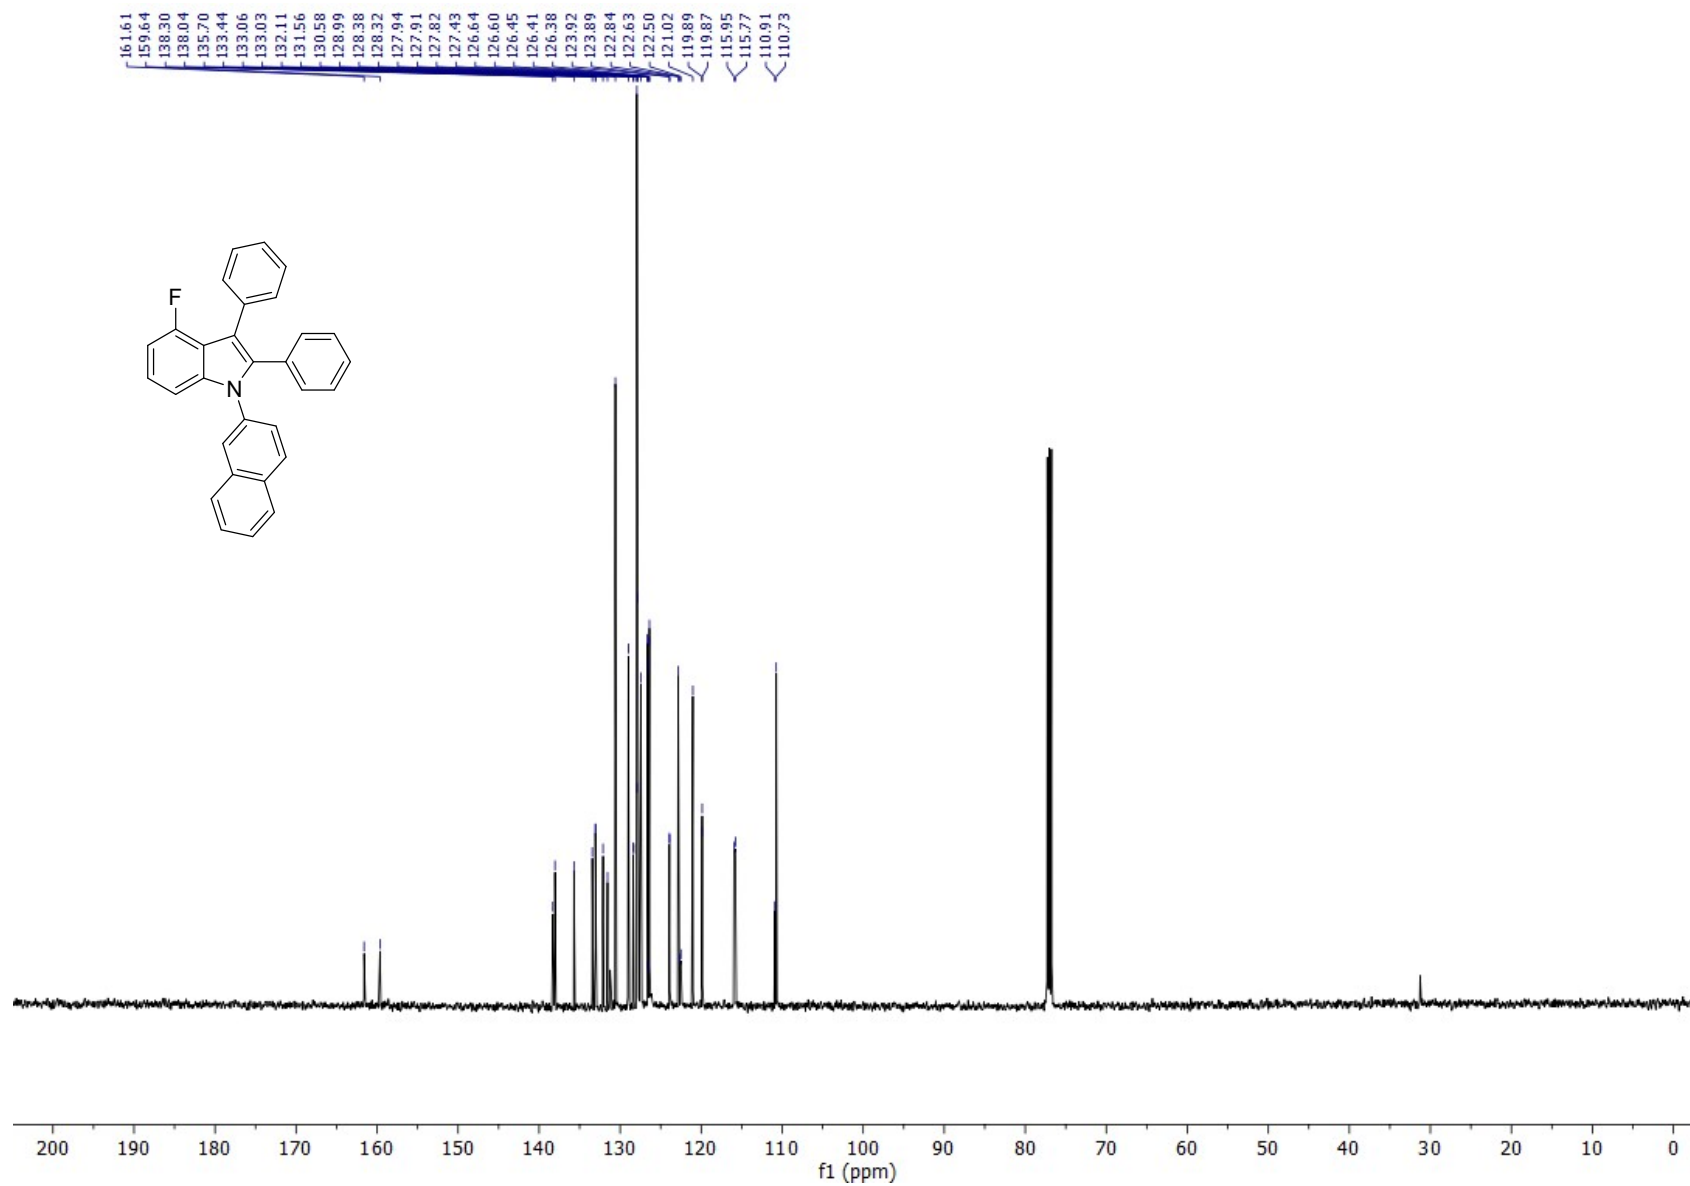

$^1\text{H}$  NMR of Compound **24** ( $\text{CDCl}_3$ , 500 MHz)

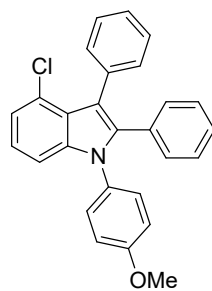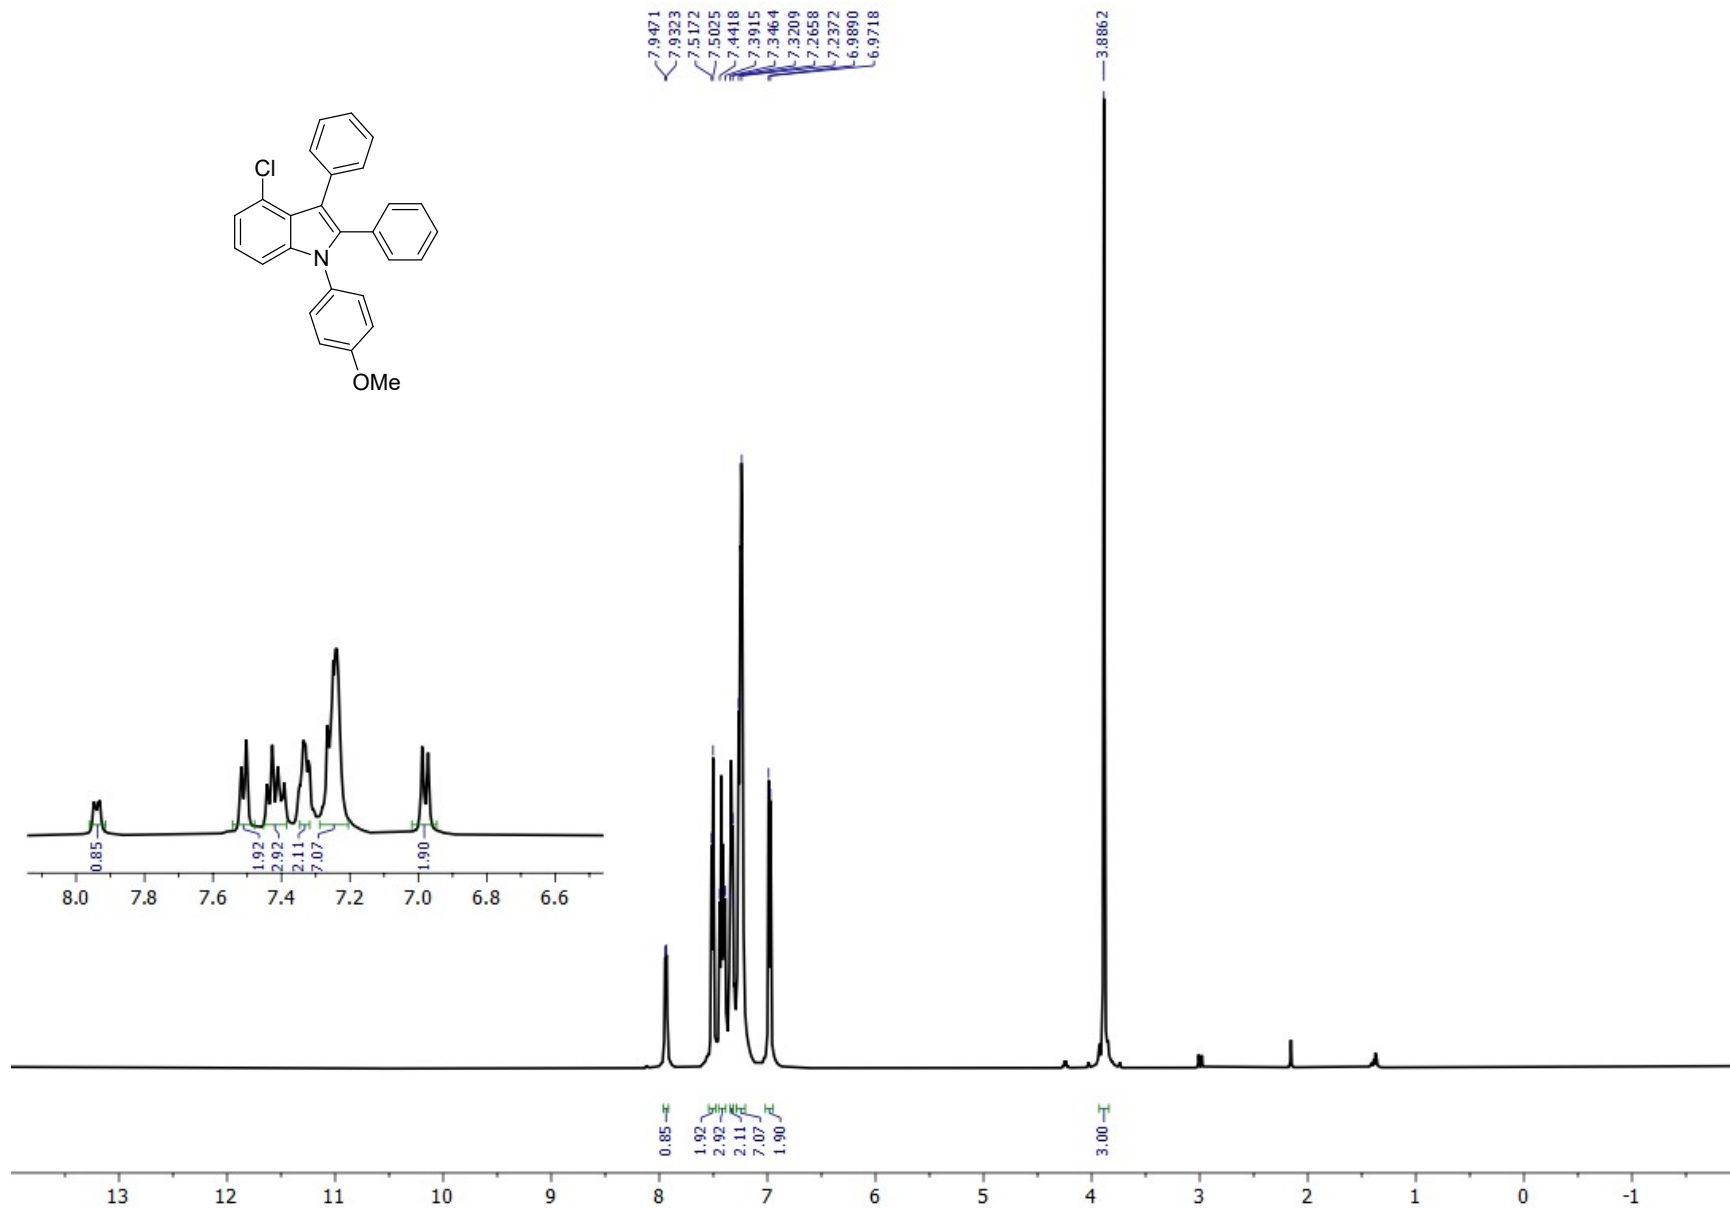

$^{13}\text{C}$  NMR of compound **24** ( $\text{CDCl}_3$ , 125 MHz)

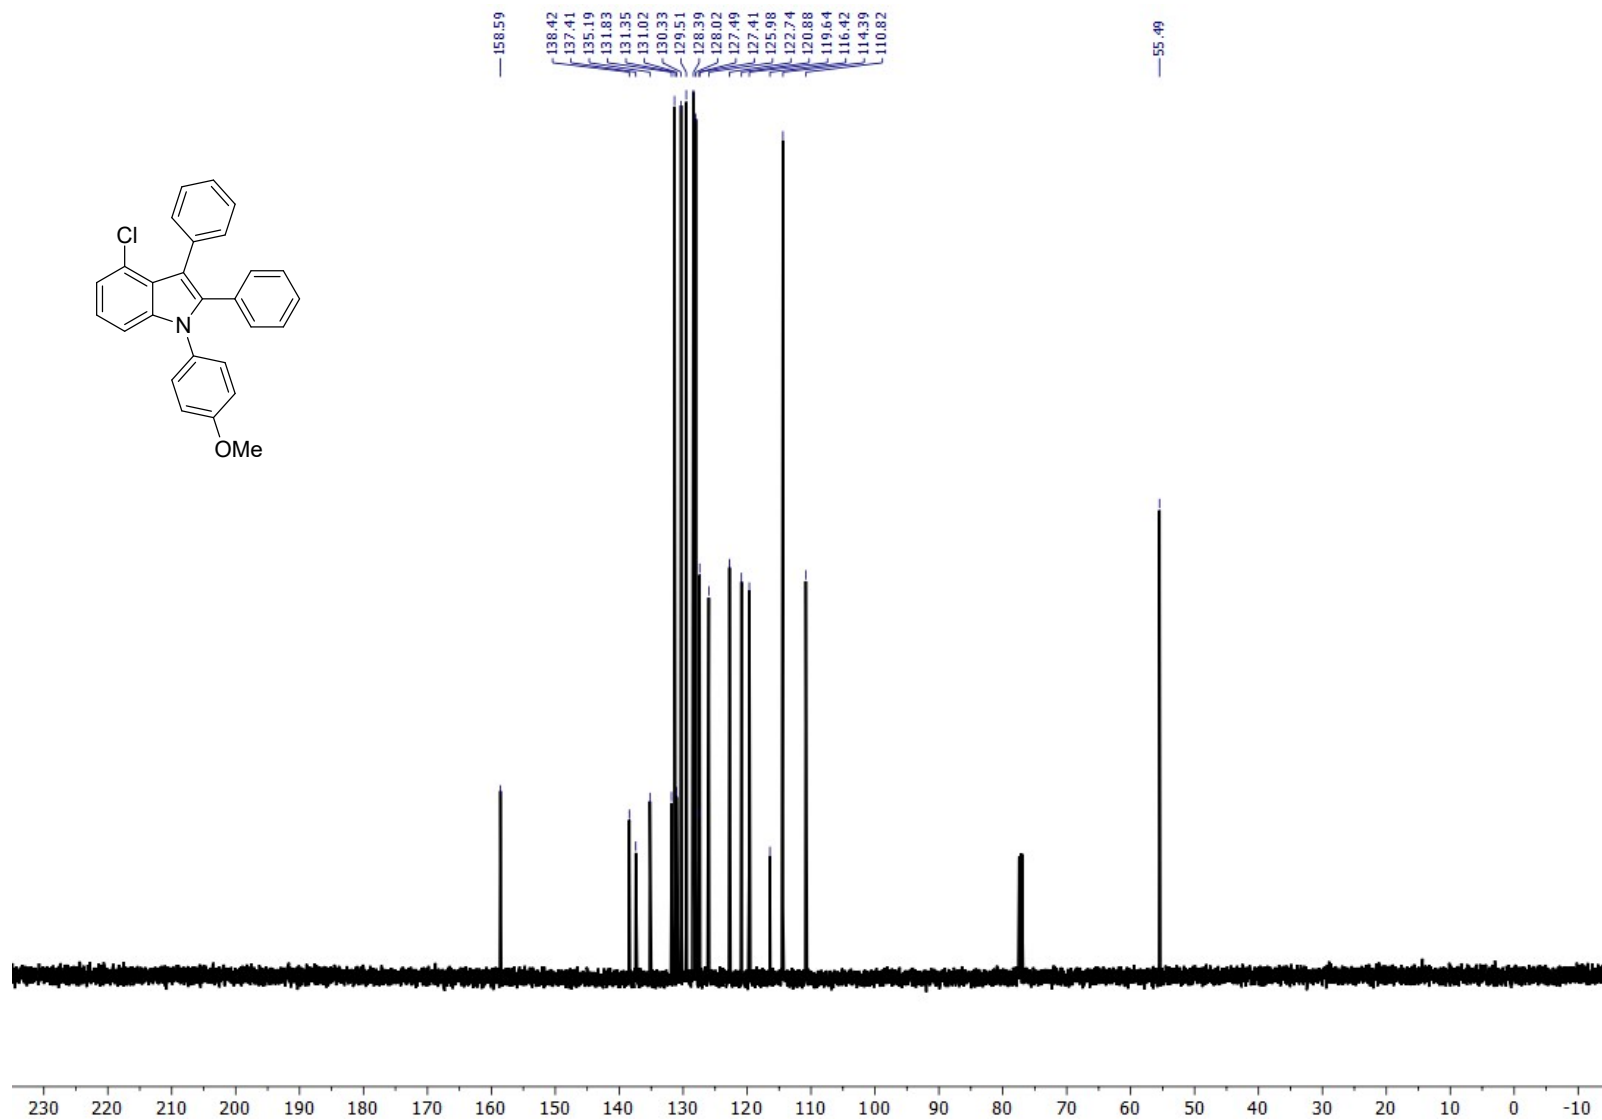

$^1\text{H}$  NMR of Compound **25** ( $\text{CDCl}_3$ , 500 MHz)

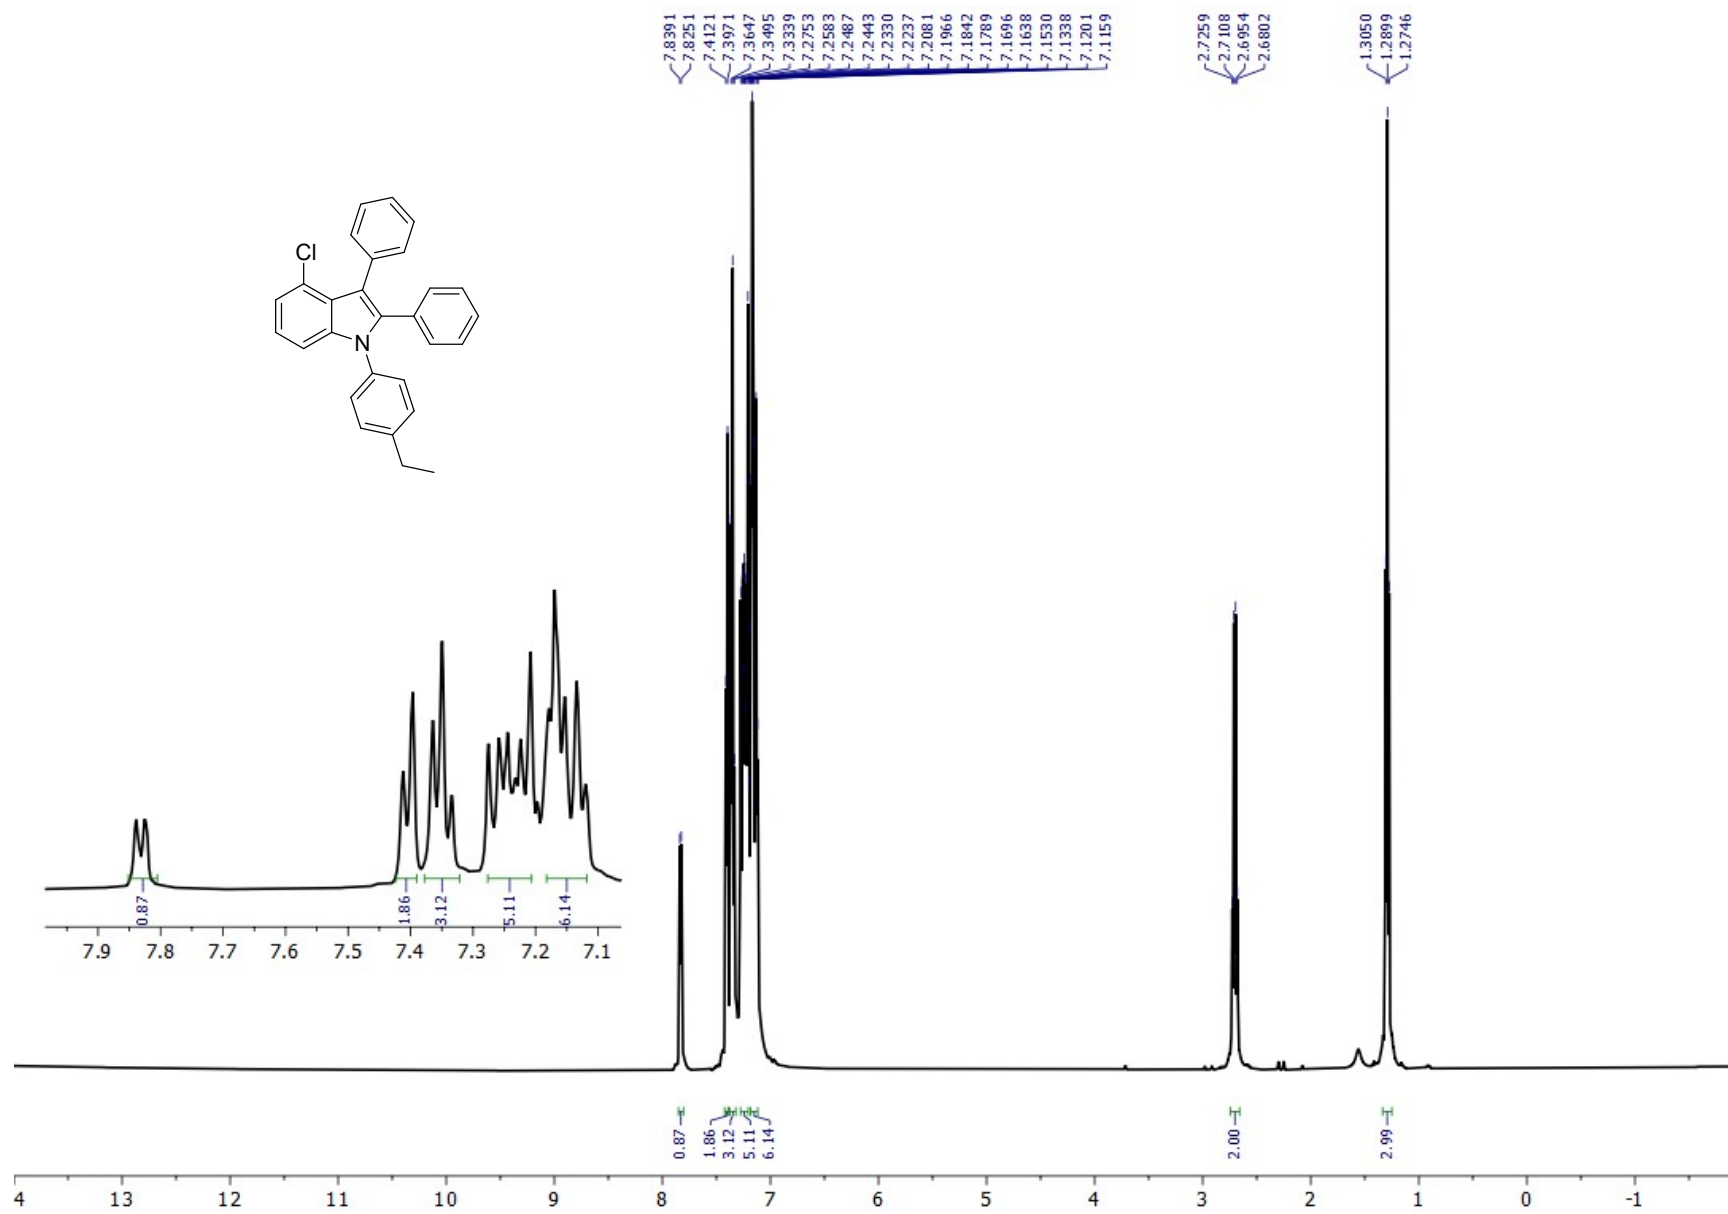

$^{13}\text{C}$  NMR of compound **25** ( $\text{CDCl}_3$ , 125 MHz)

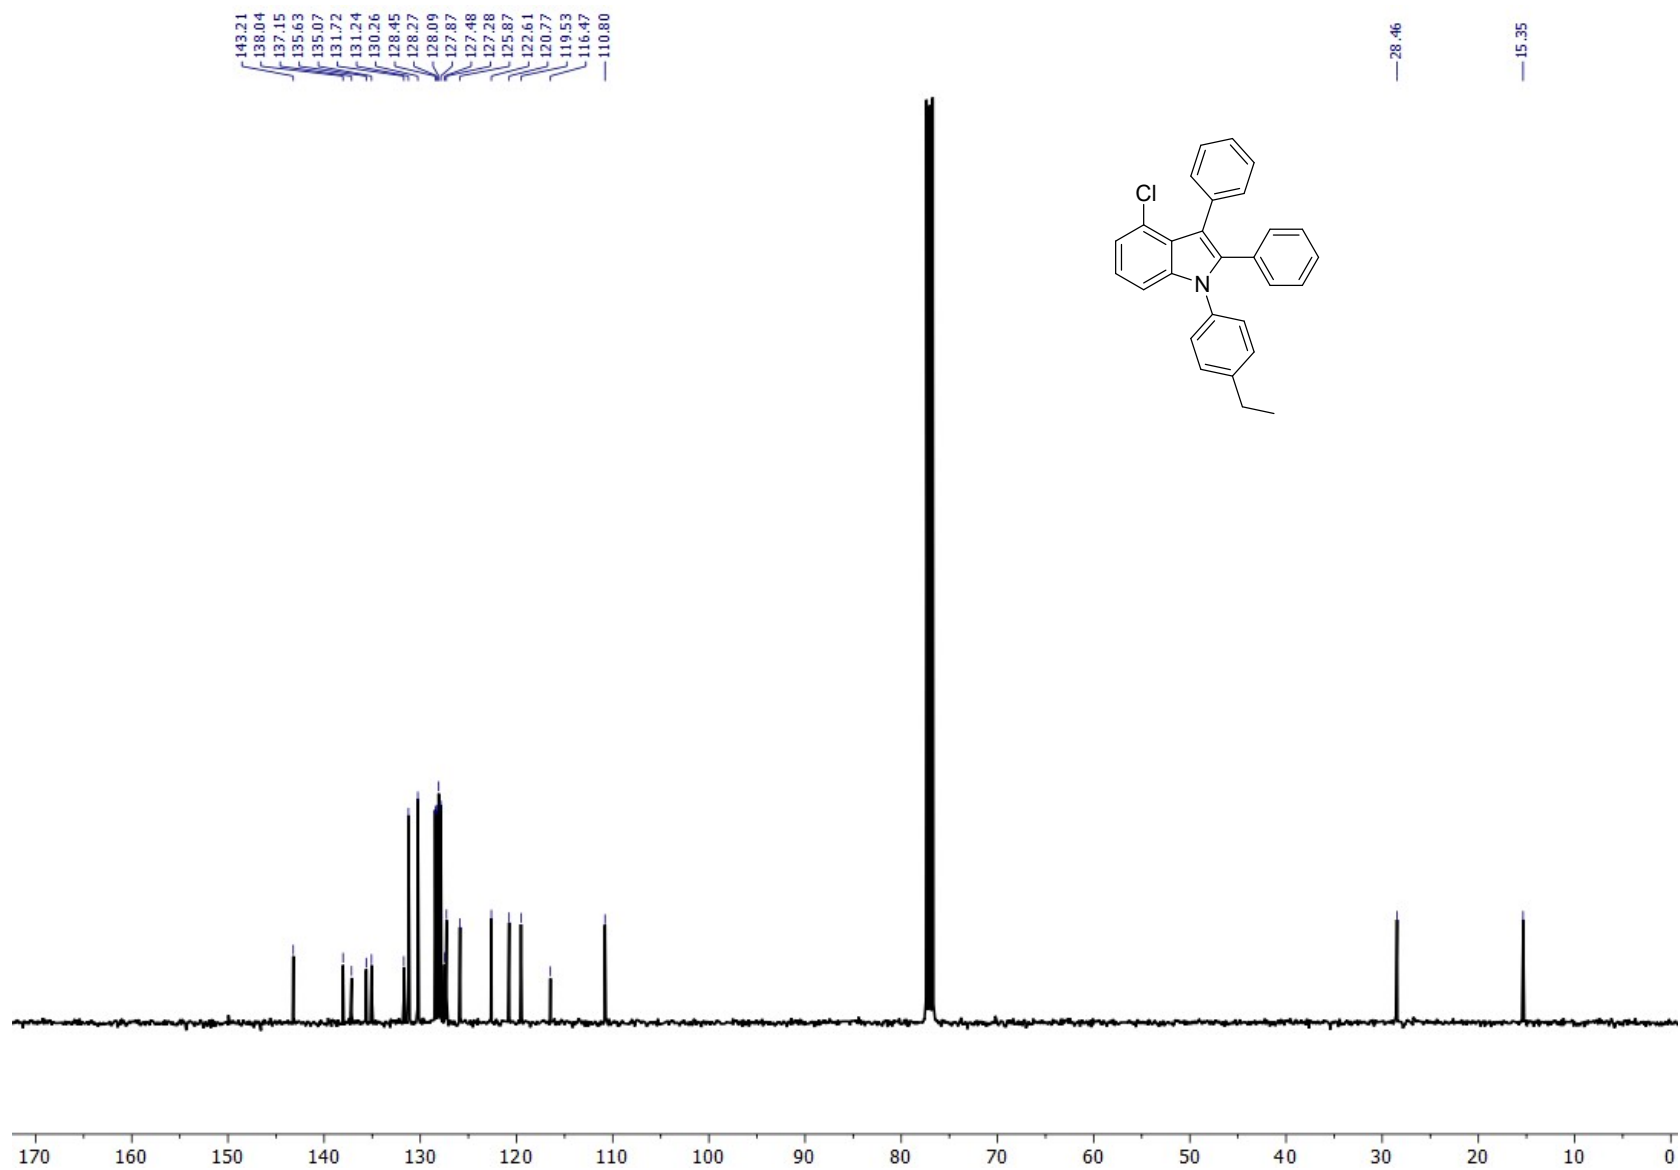

$^1\text{H}$  NMR of Compound **26** ( $\text{CDCl}_3$ , 500 MHz)

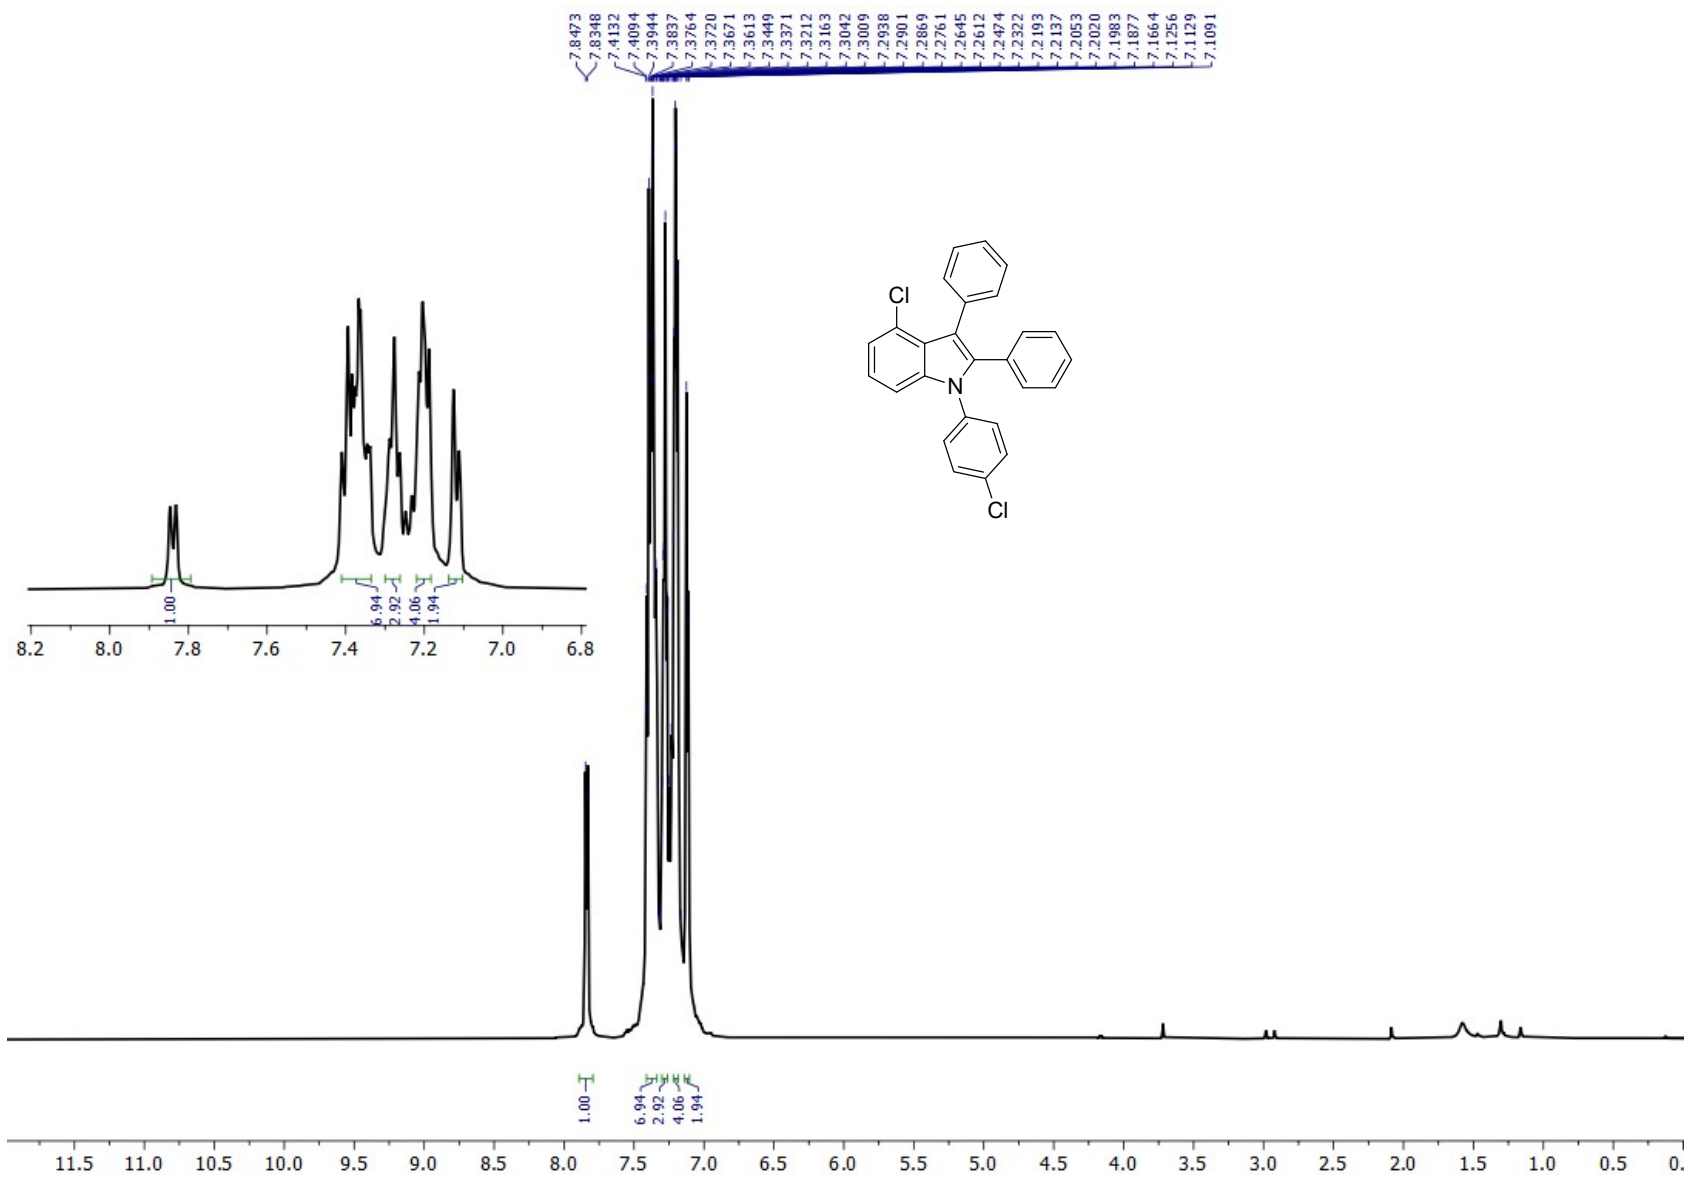

$^{13}\text{C}$  NMR of compound **26** ( $\text{CDCl}_3$ , 125 MHz)

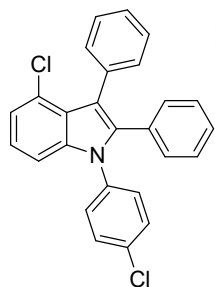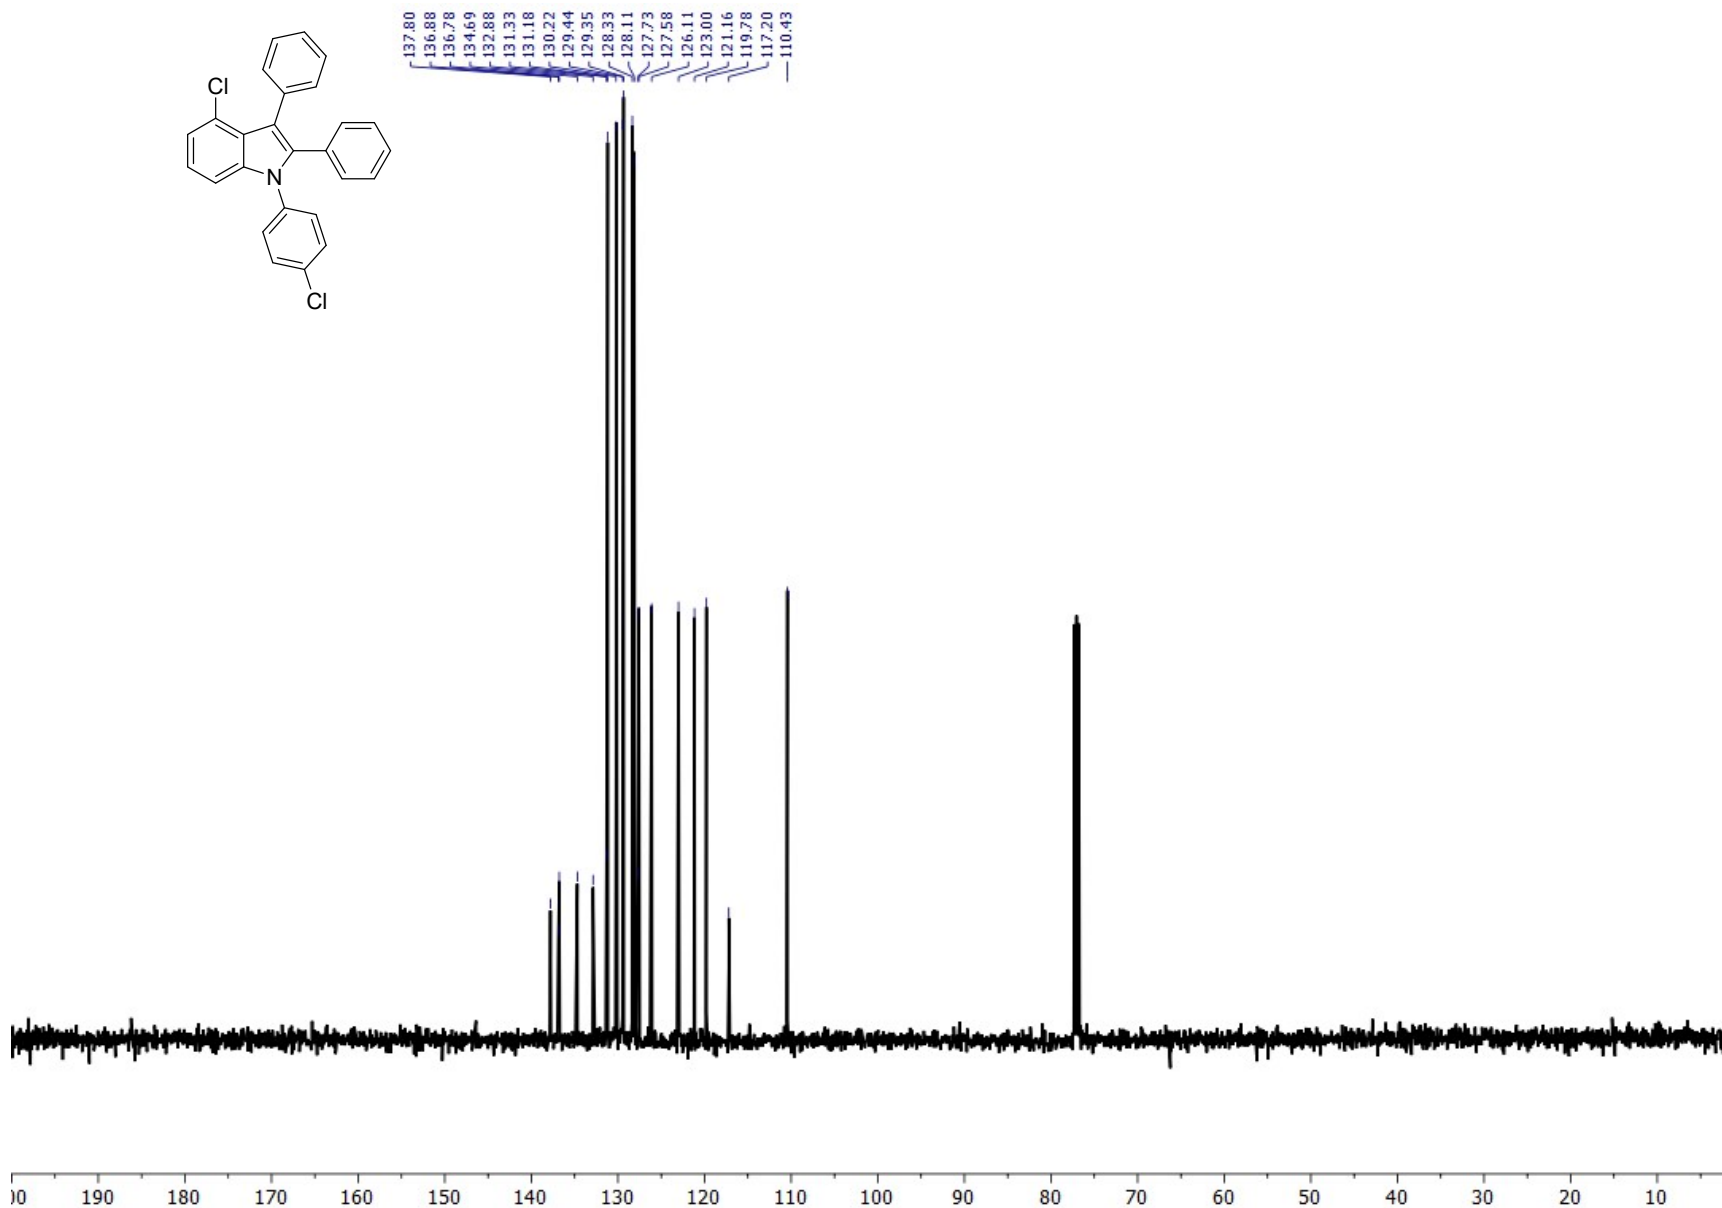

<sup>1</sup>H NMR of Compound **27** (CDCl<sub>3</sub>, 500 MHz)

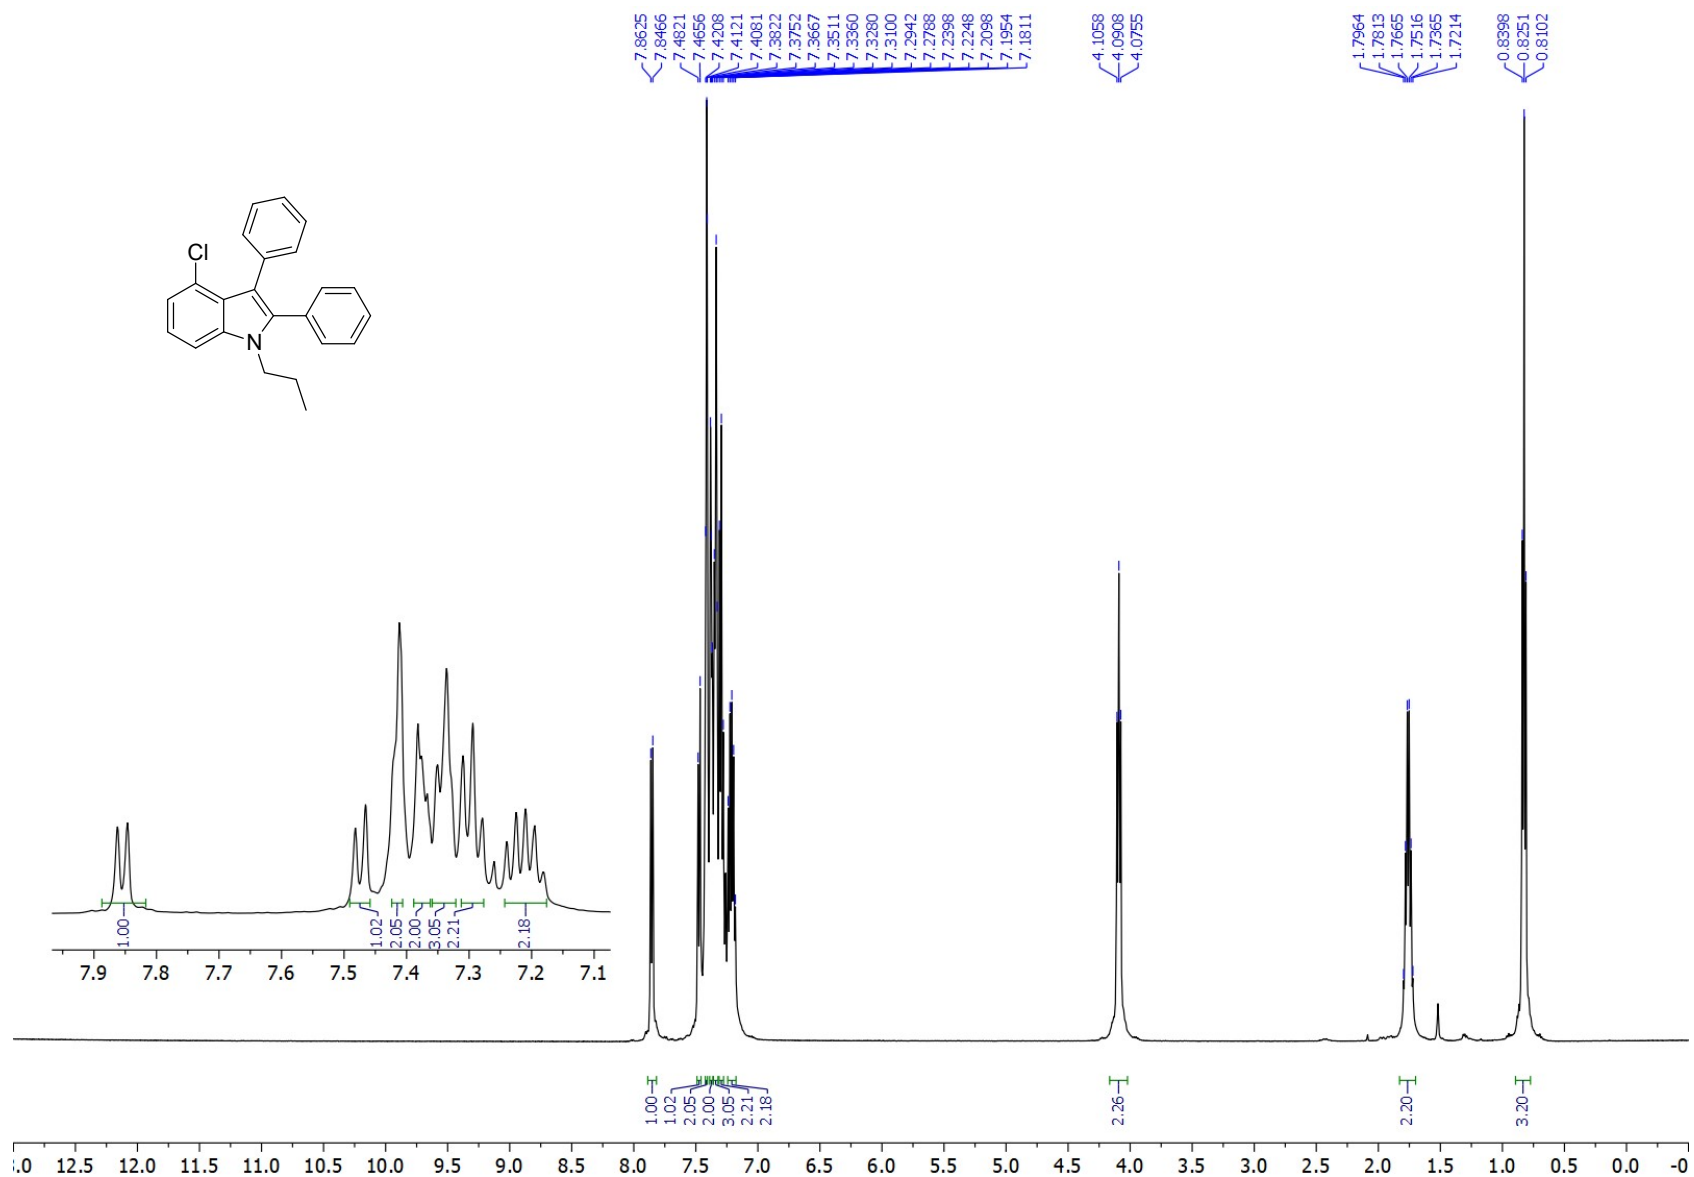



$^{13}\text{C}$  NMR of compound **27** ( $\text{CDCl}_3$ , 125 MHz)

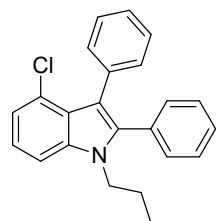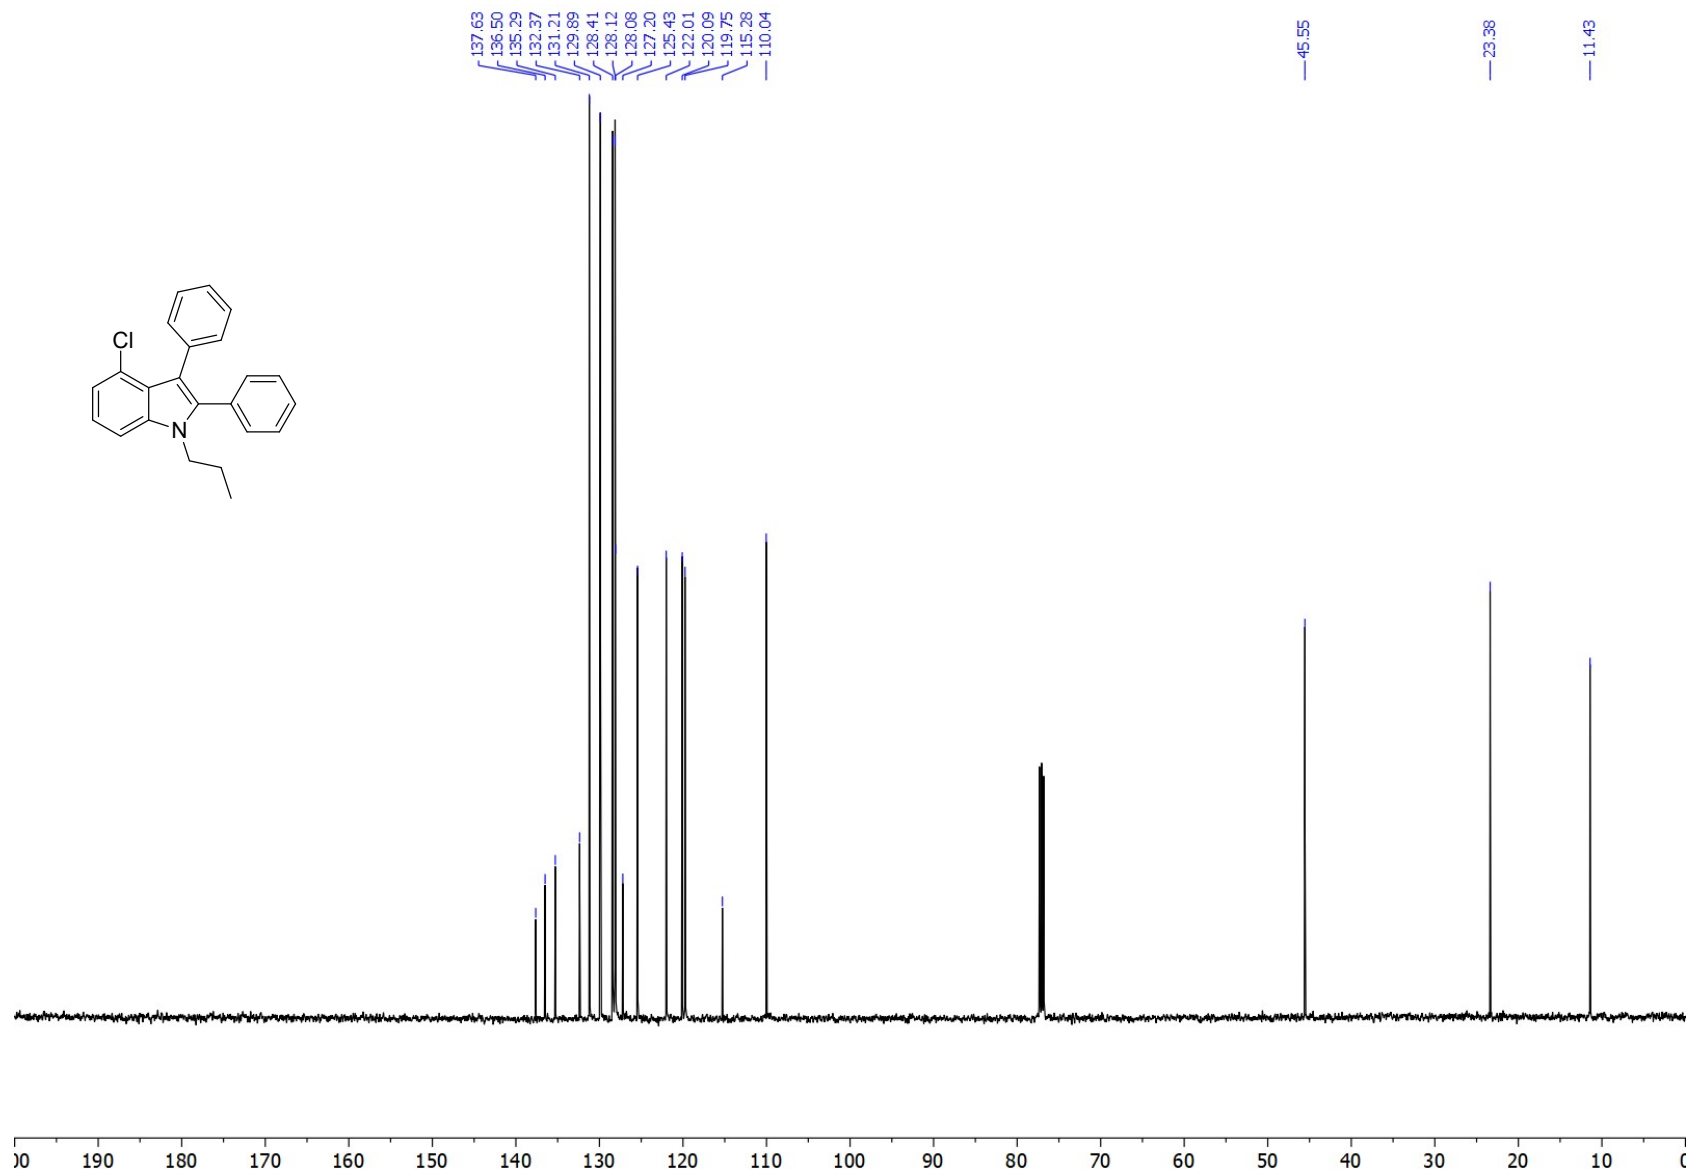

<sup>1</sup>H NMR of Compound **28** (CDCl<sub>3</sub>, 500 MHz)

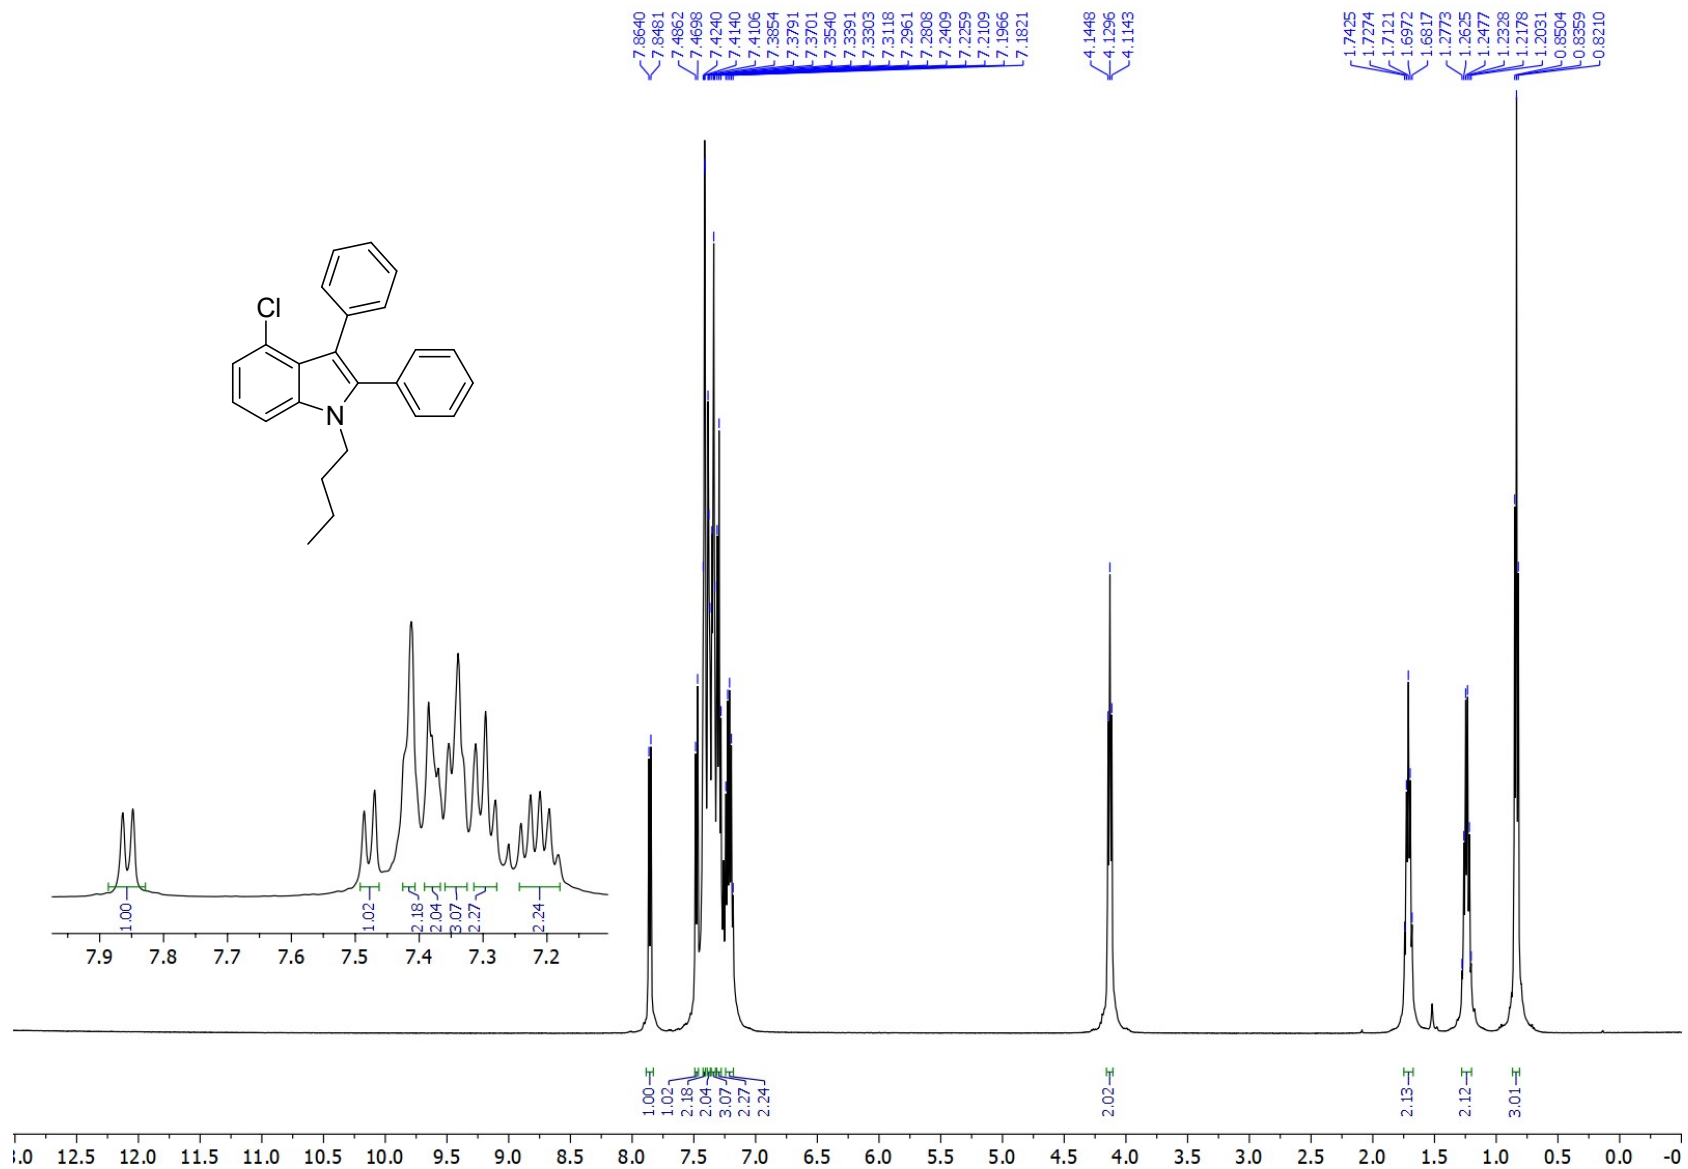

$^{13}\text{C}$  NMR of compound **28** ( $\text{CDCl}_3$ , 125 MHz)

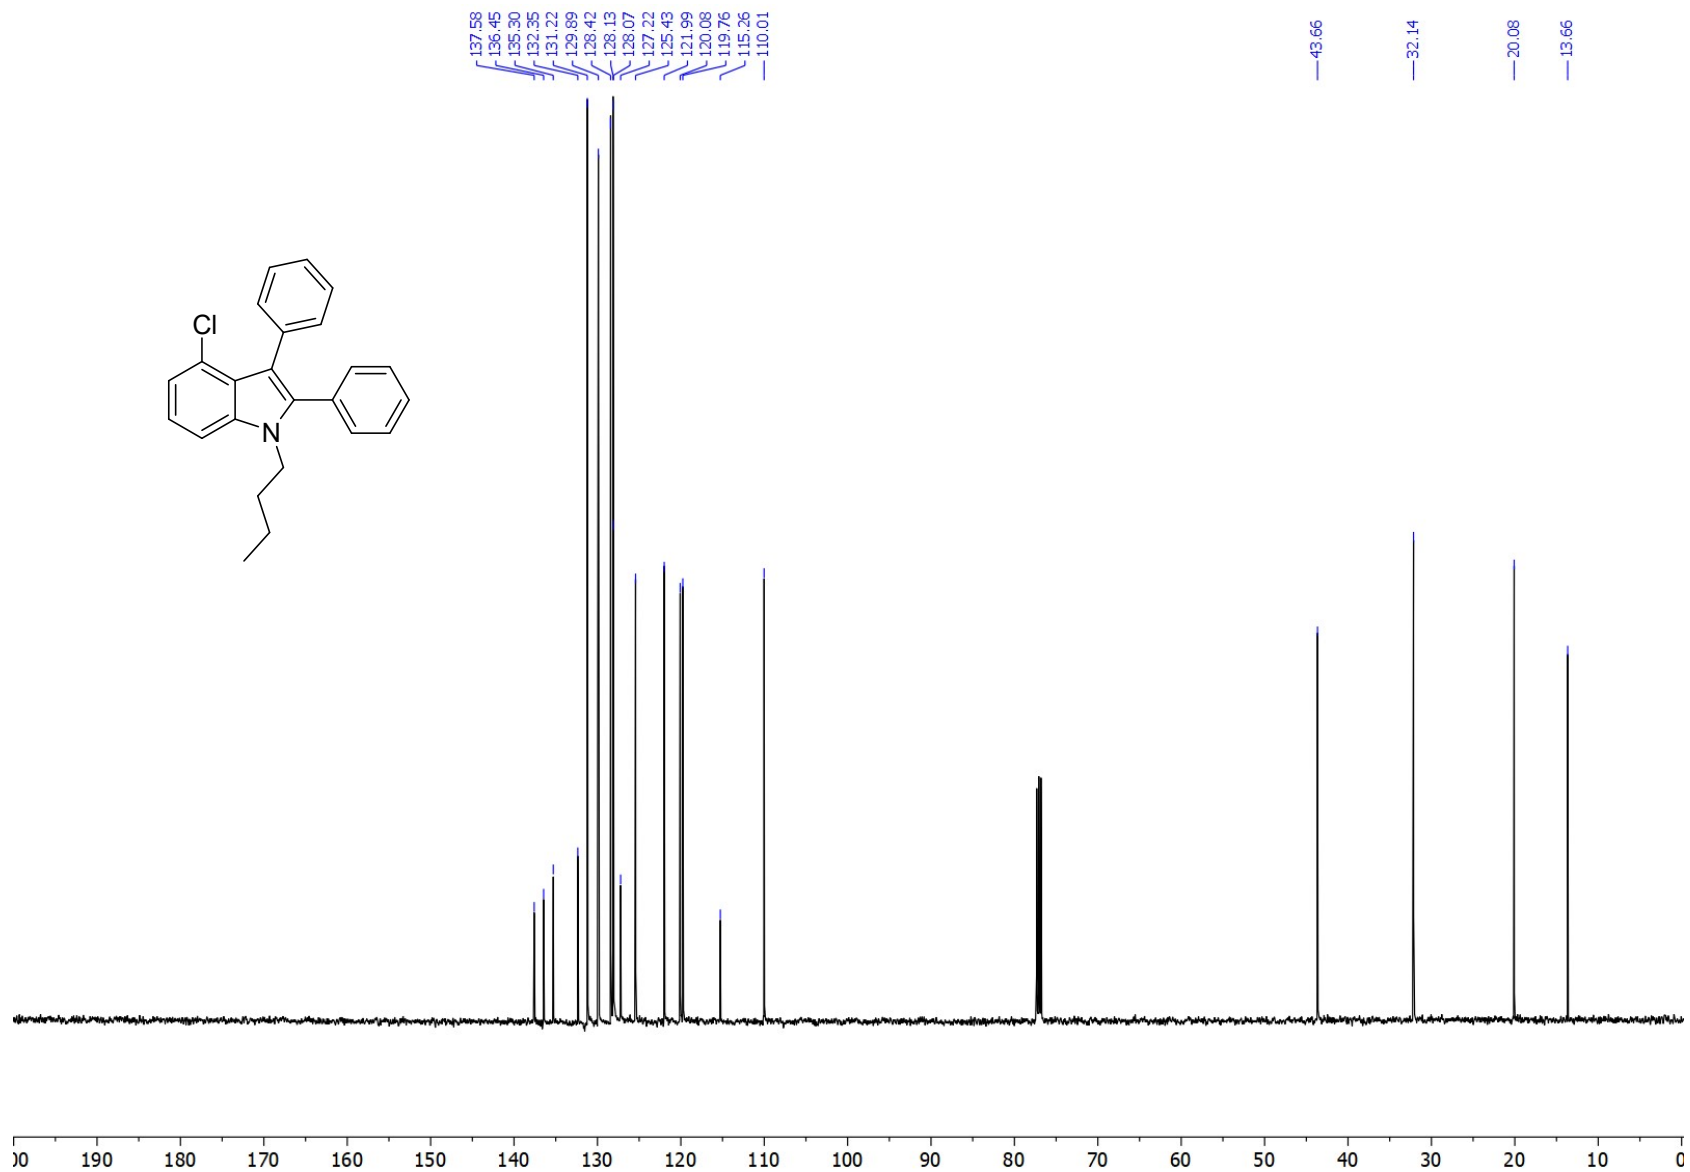

$^1\text{H}$  NMR of Compound **29** ( $\text{CDCl}_3$ , 500 MHz)

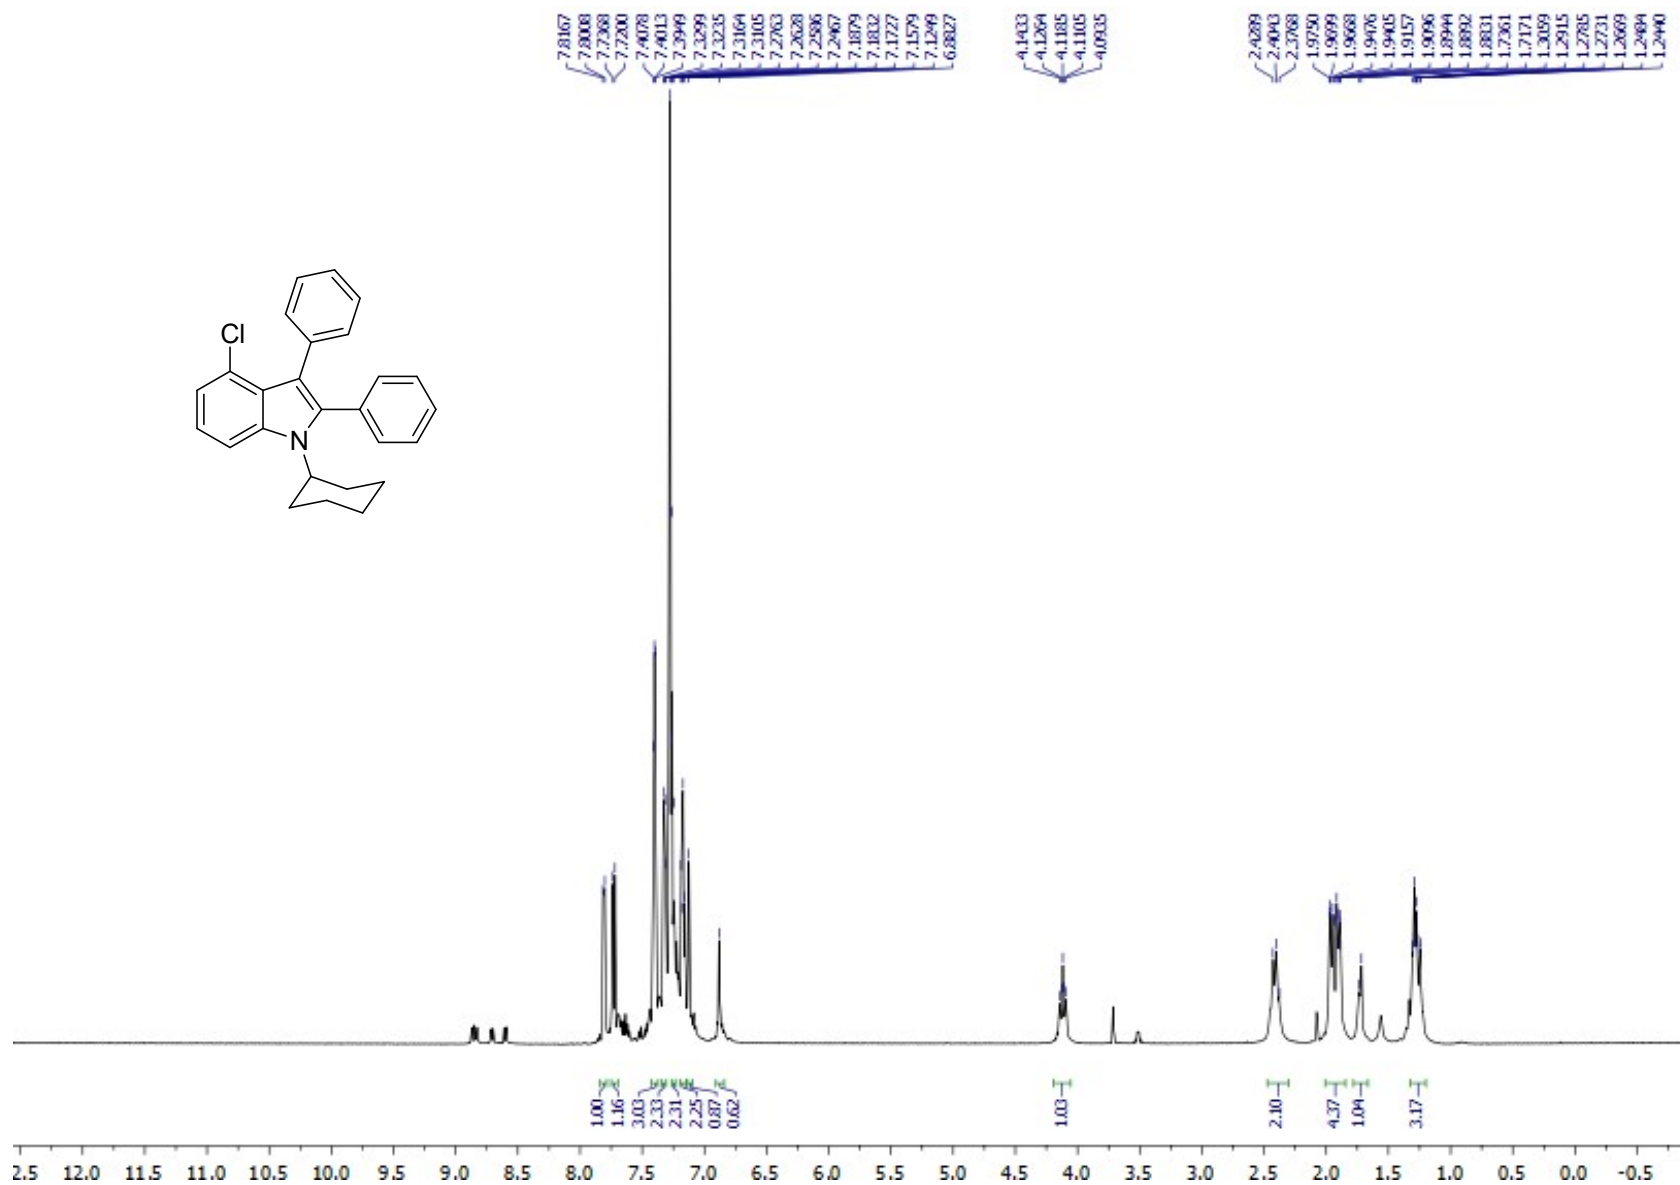

$^{13}\text{C}$  NMR of compound **29** ( $\text{CDCl}_3$ , 125 MHz)

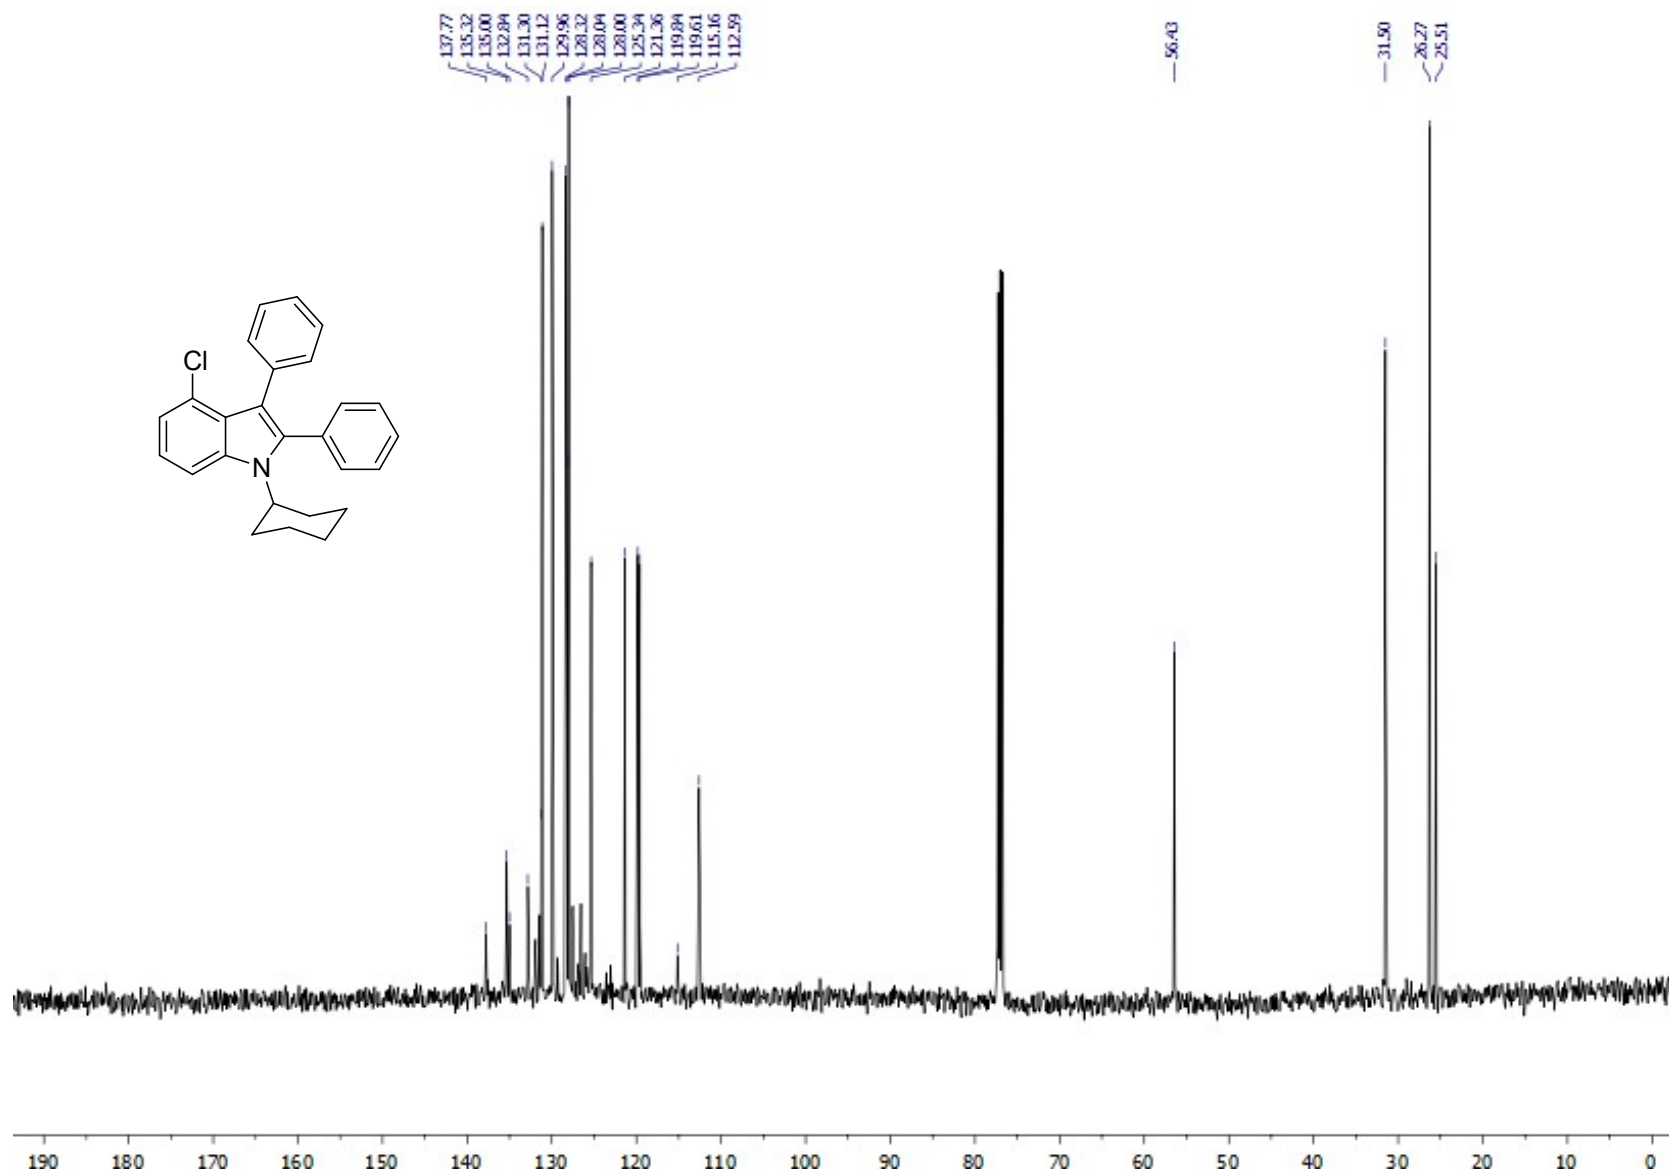

<sup>1</sup>H NMR of Compound **30** (CDCl<sub>3</sub>, 500 MHz)

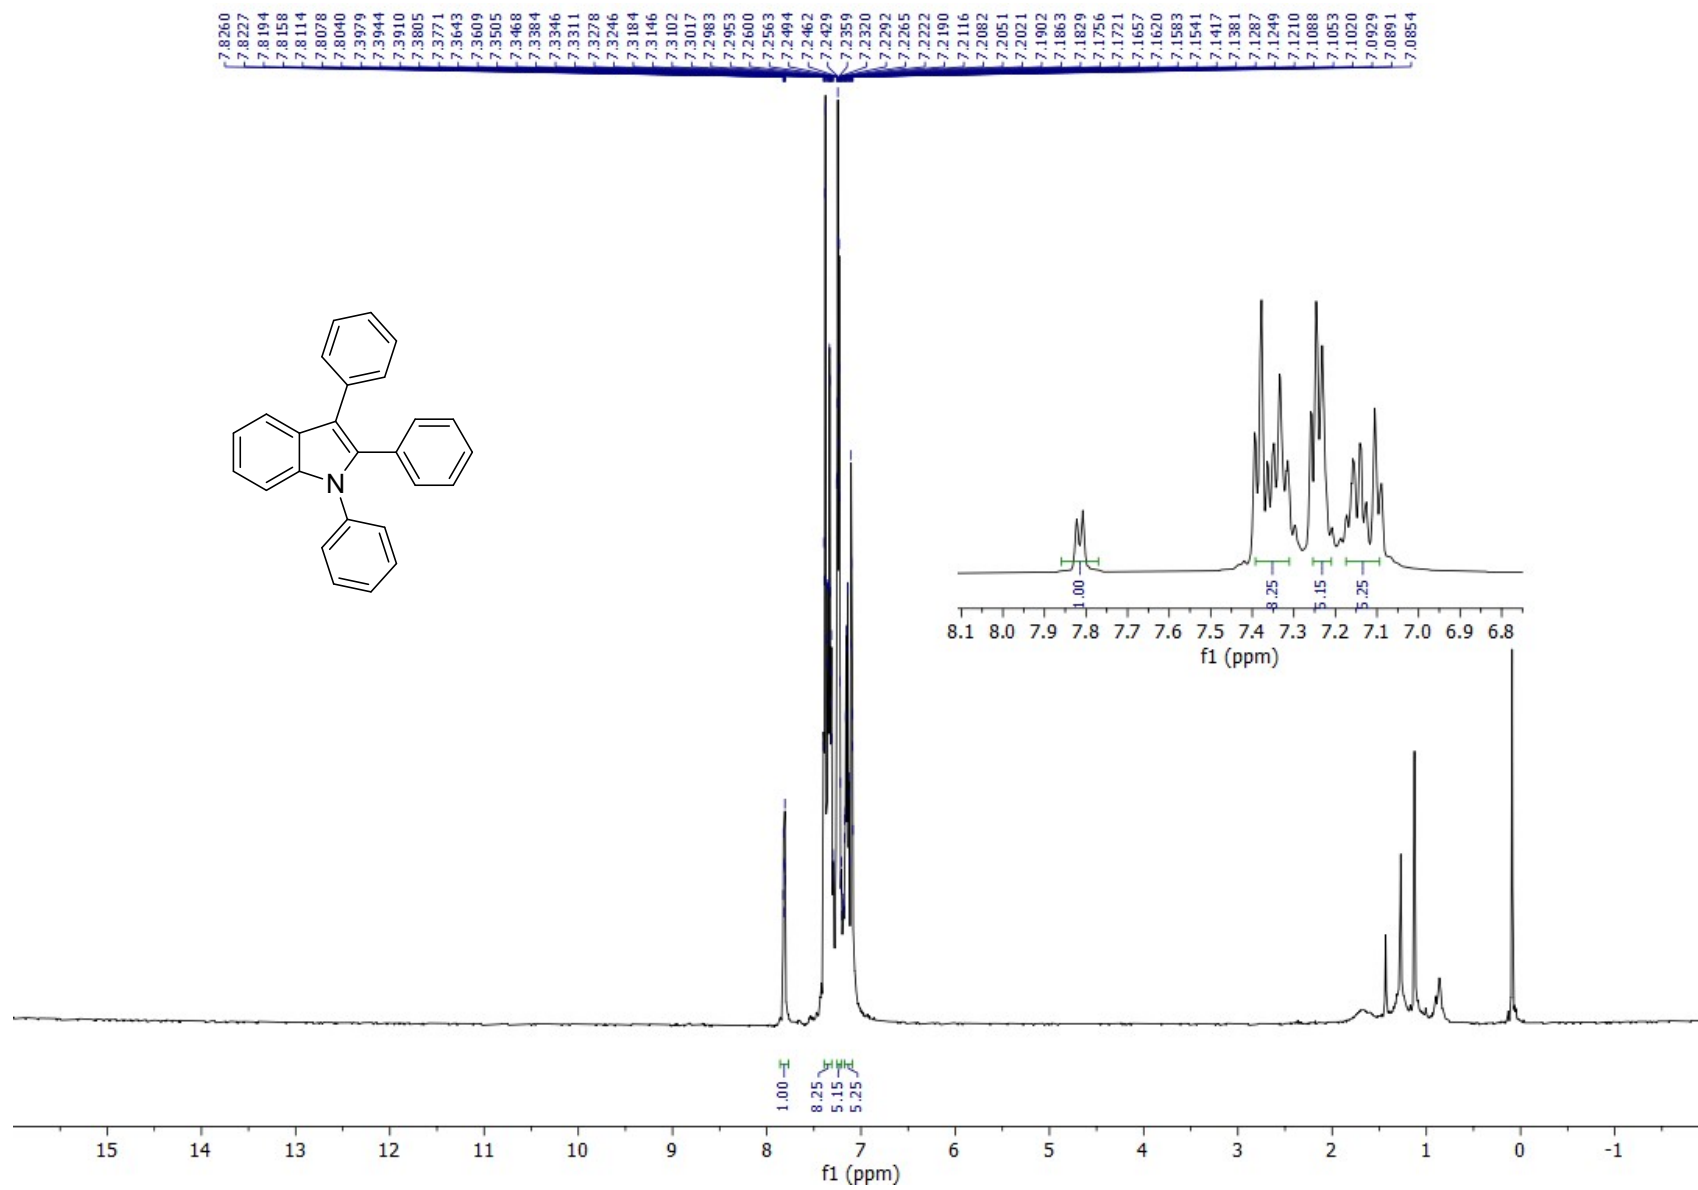

$^{13}\text{C}$  NMR of compound **30** ( $\text{CDCl}_3$ , 125 MHz)

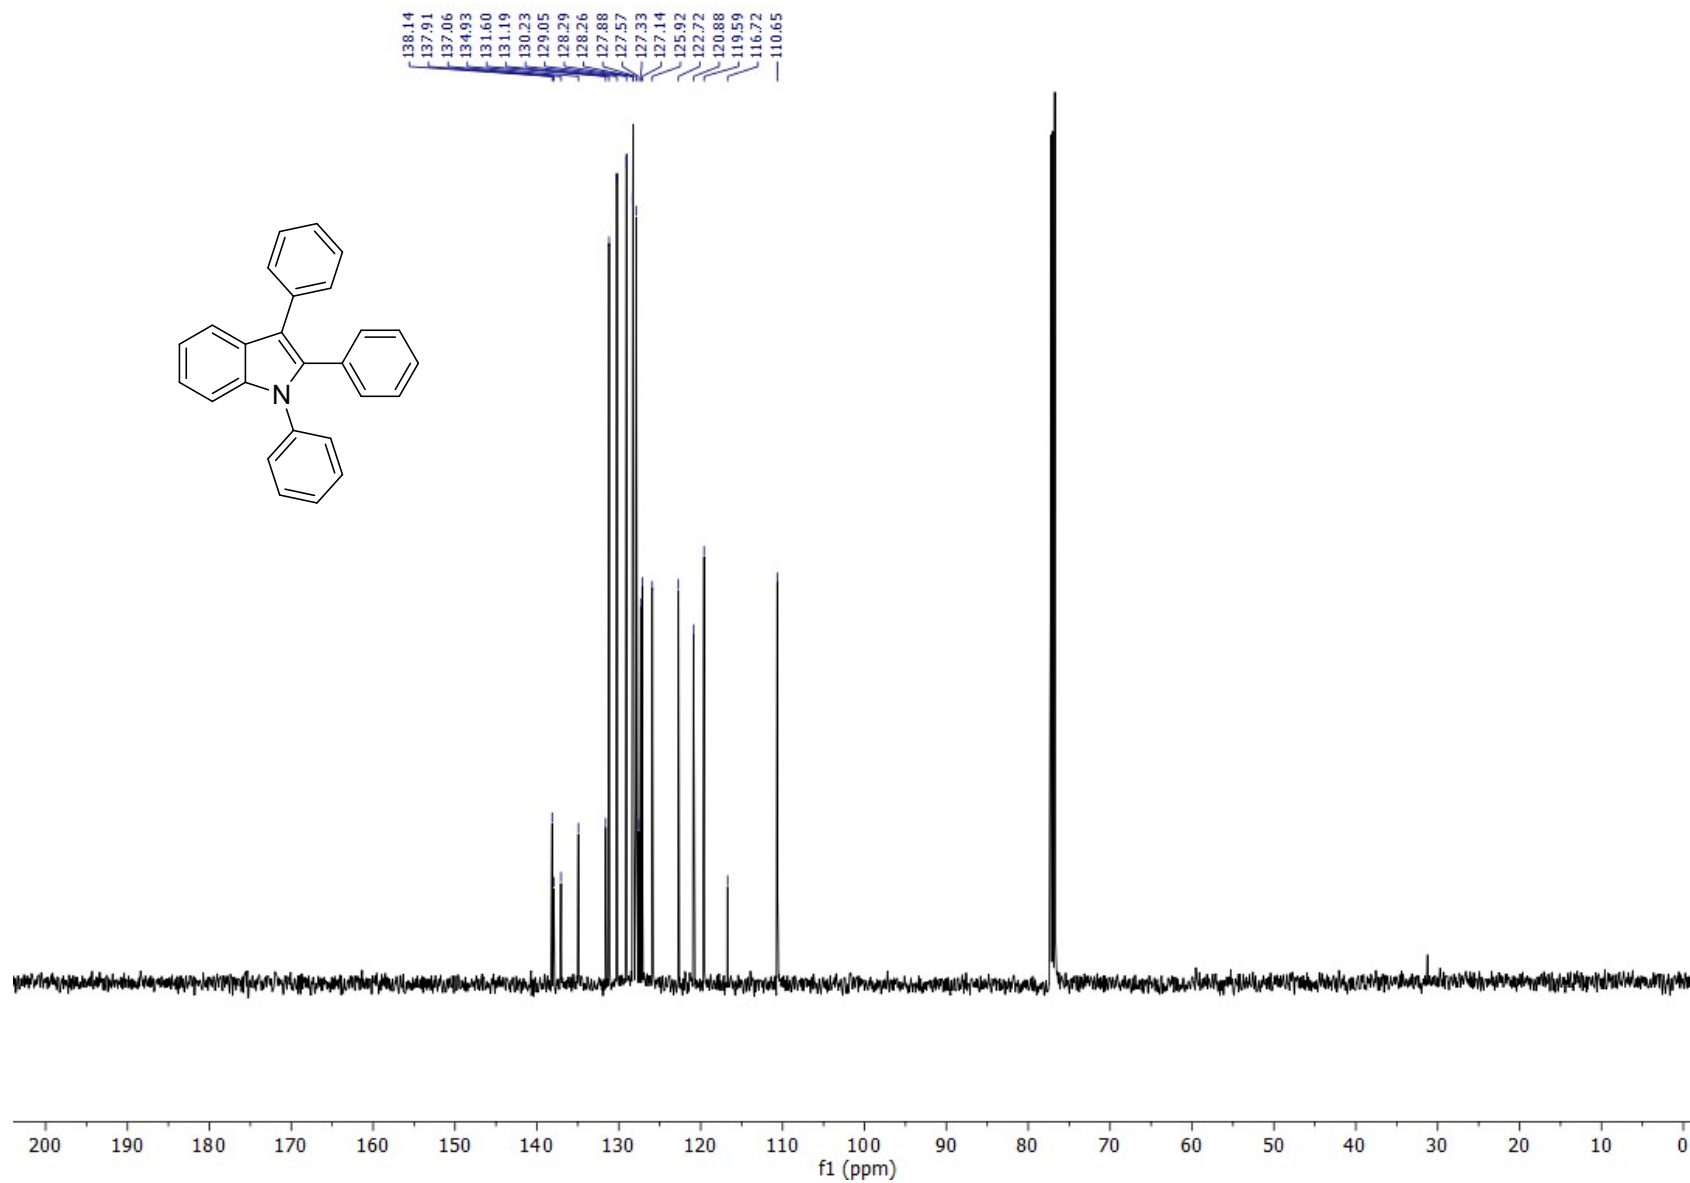

<sup>1</sup>H NMR of Compound **31** (CDCl<sub>3</sub>, 500 MHz)

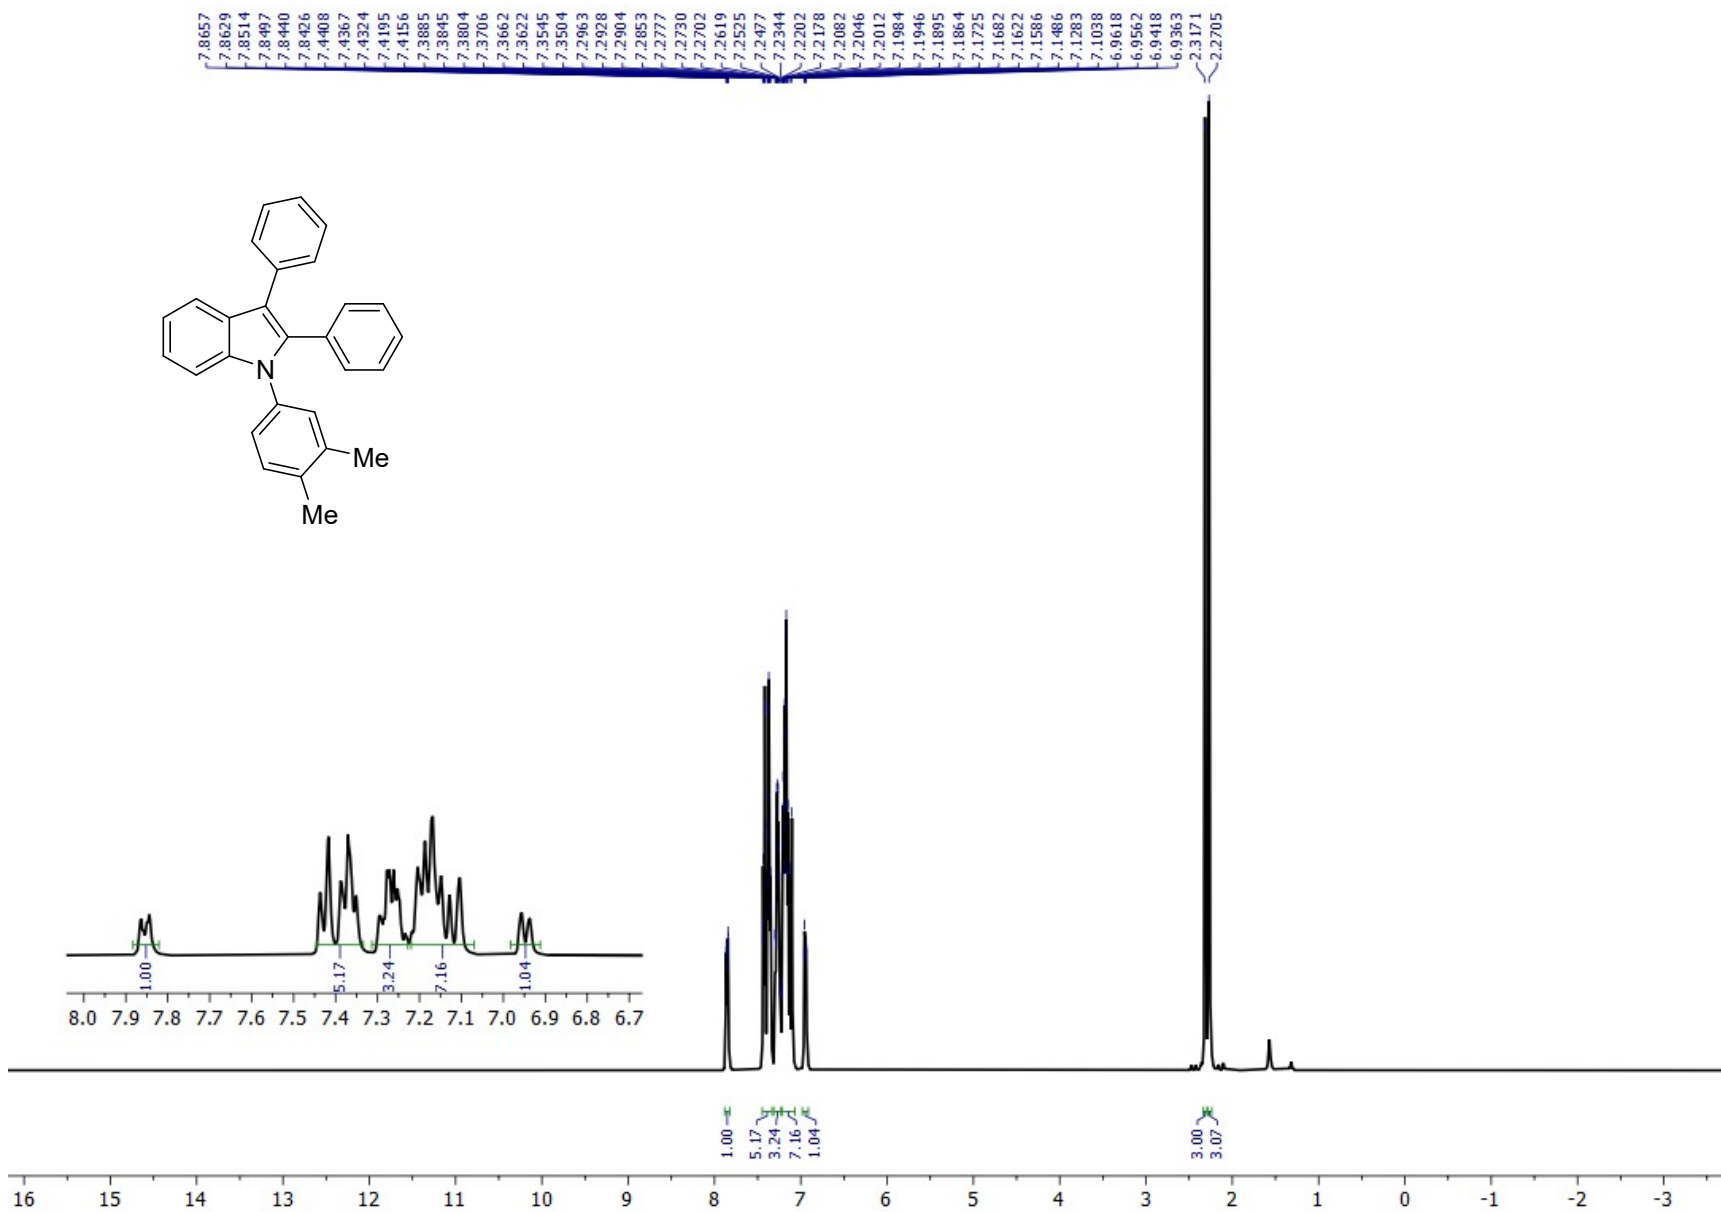



$^{13}\text{C}$  NMR of compound **31** ( $\text{CDCl}_3$ , 125 MHz)

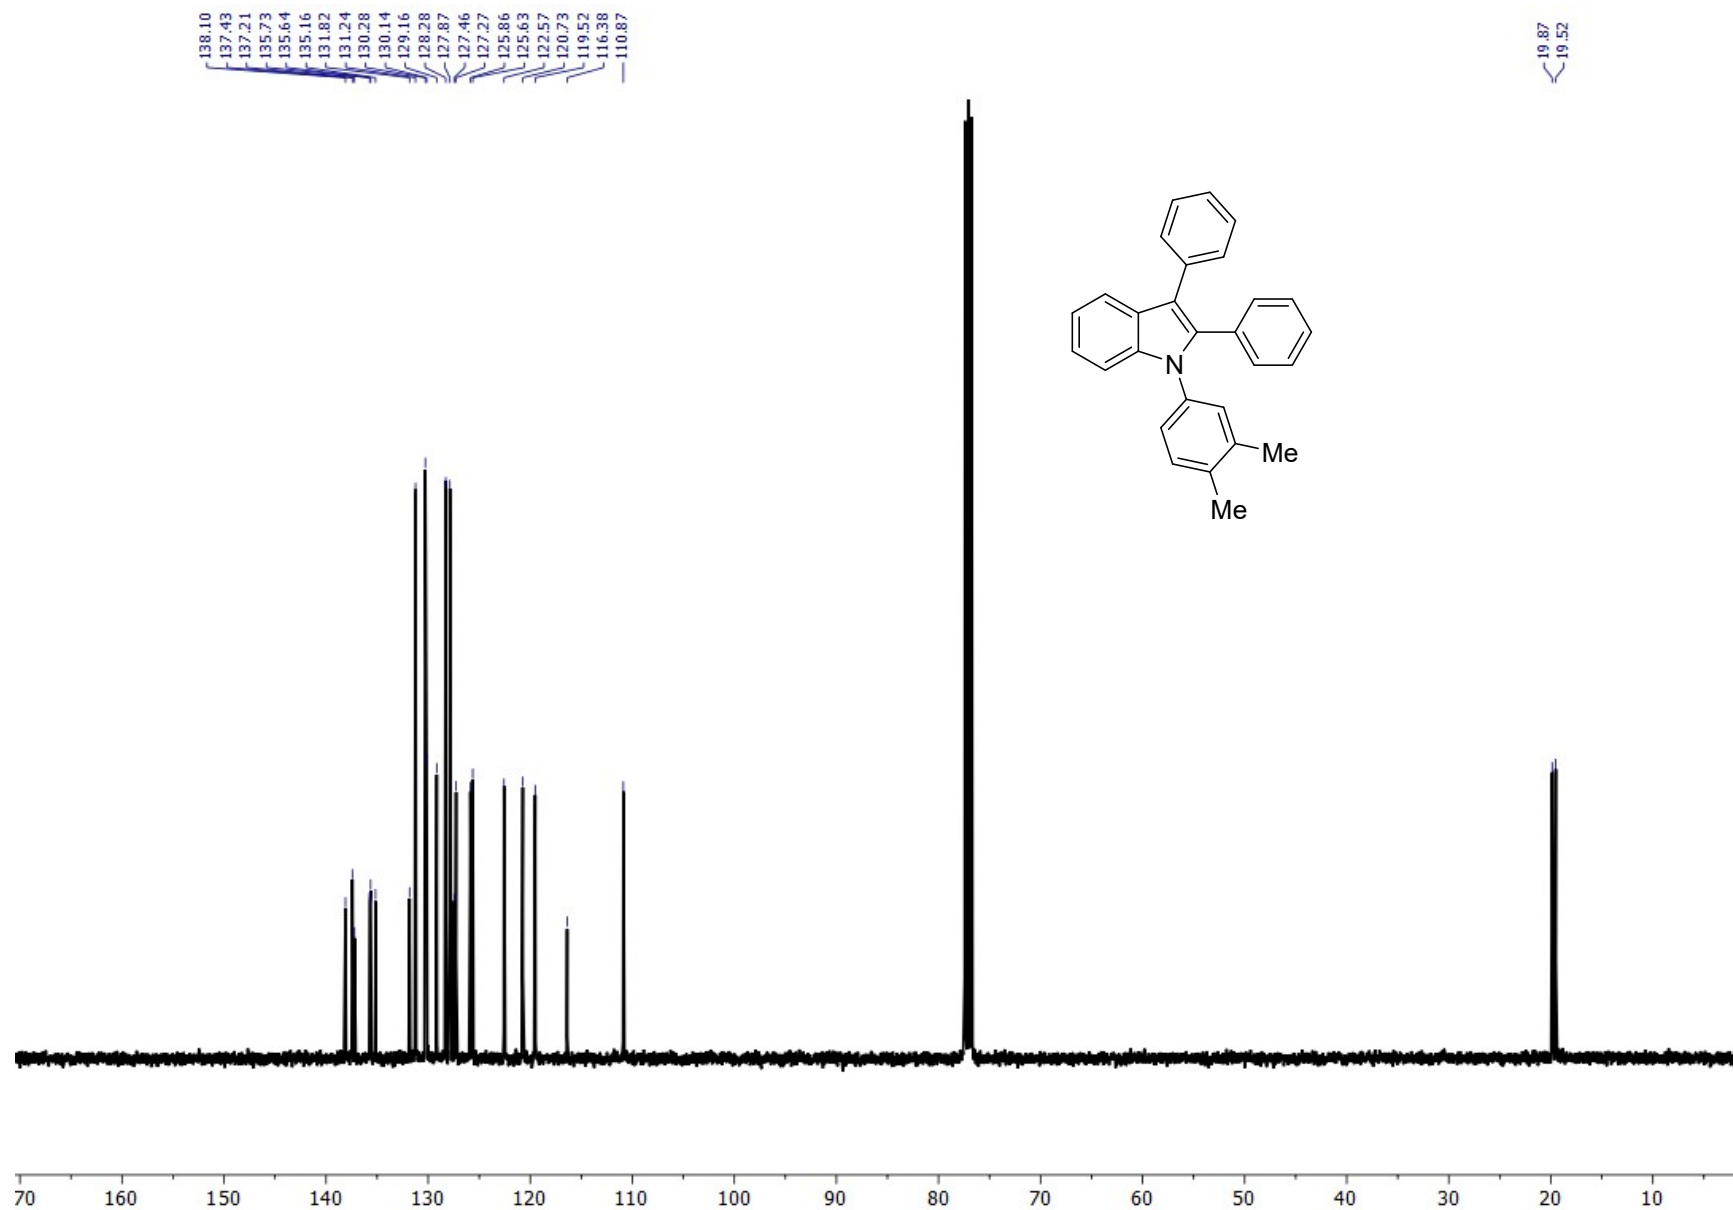

<sup>1</sup>H NMR of Compound **32** (CDCl<sub>3</sub>, 500 MHz)

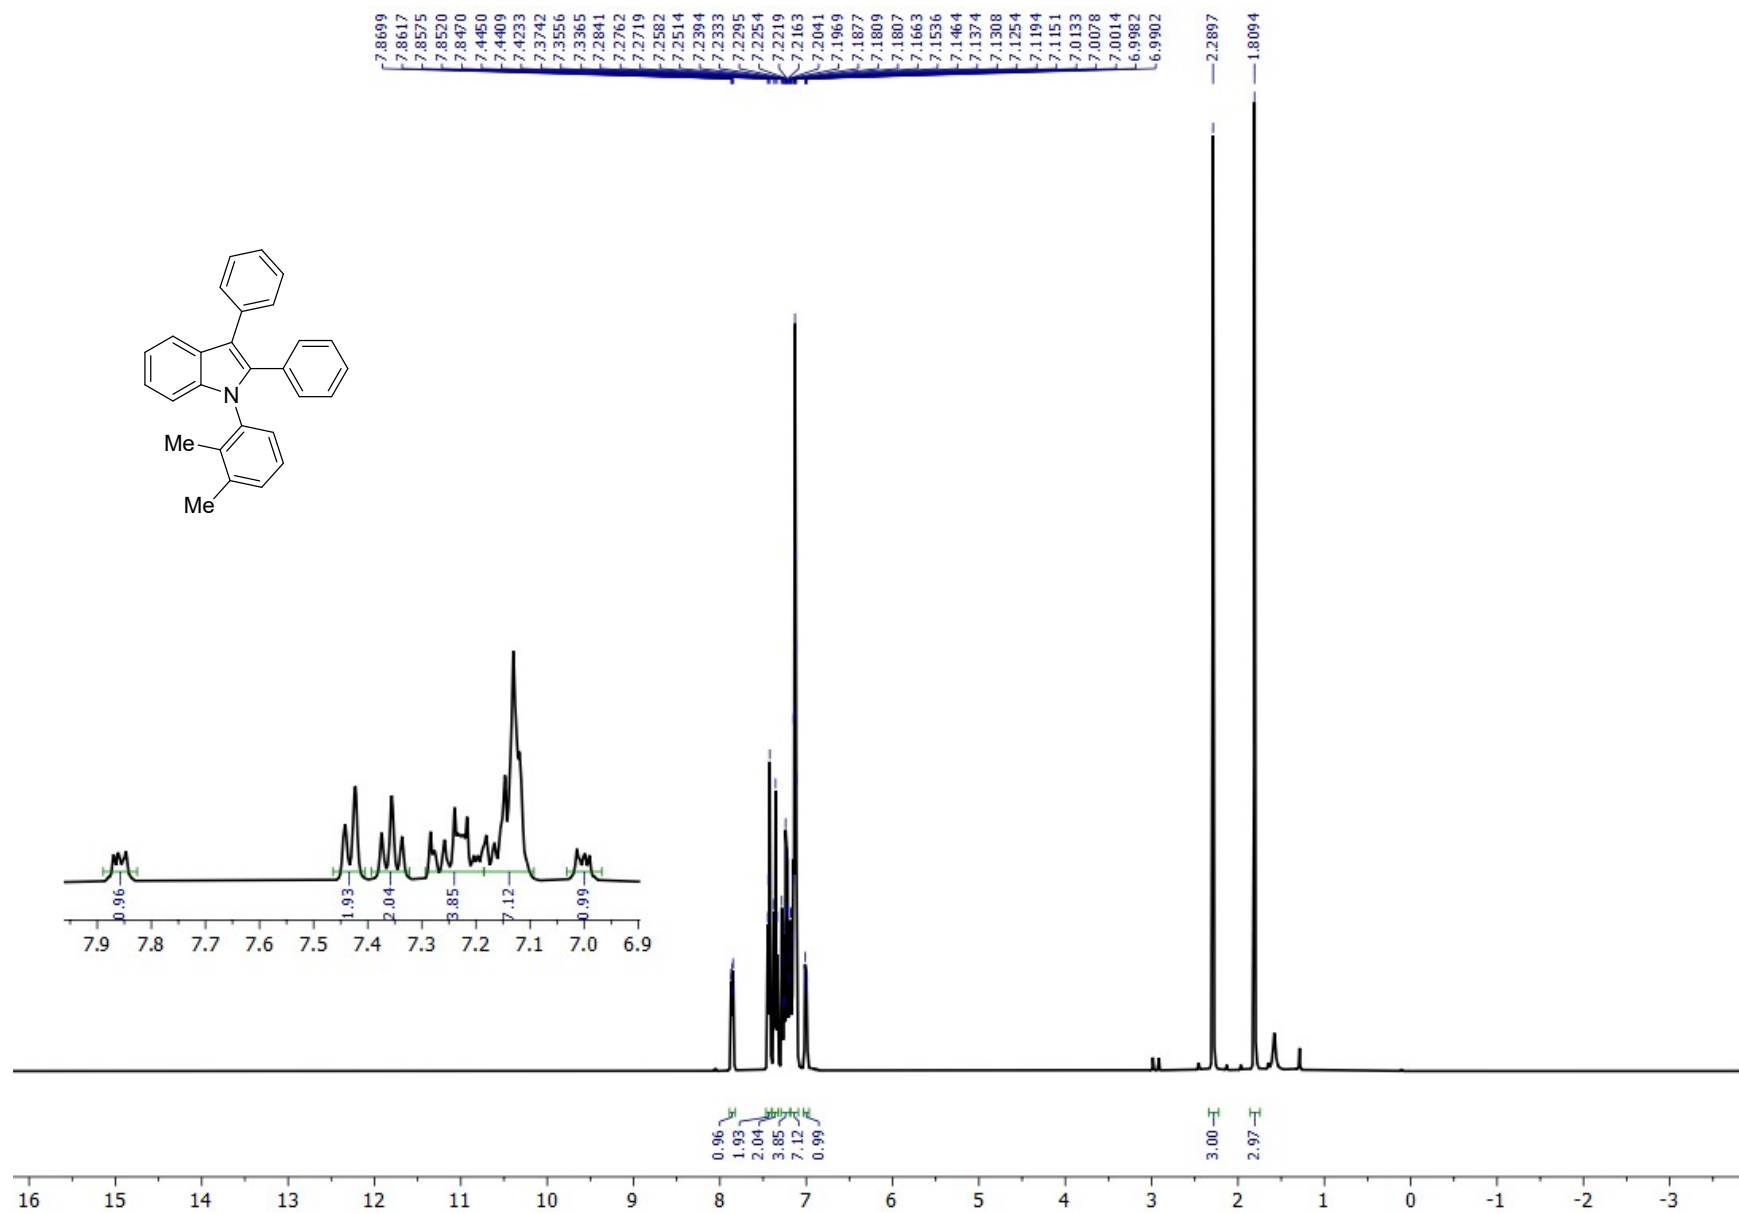

$^{13}\text{C}$  NMR of compound **32** ( $\text{CDCl}_3$ , 125 MHz)

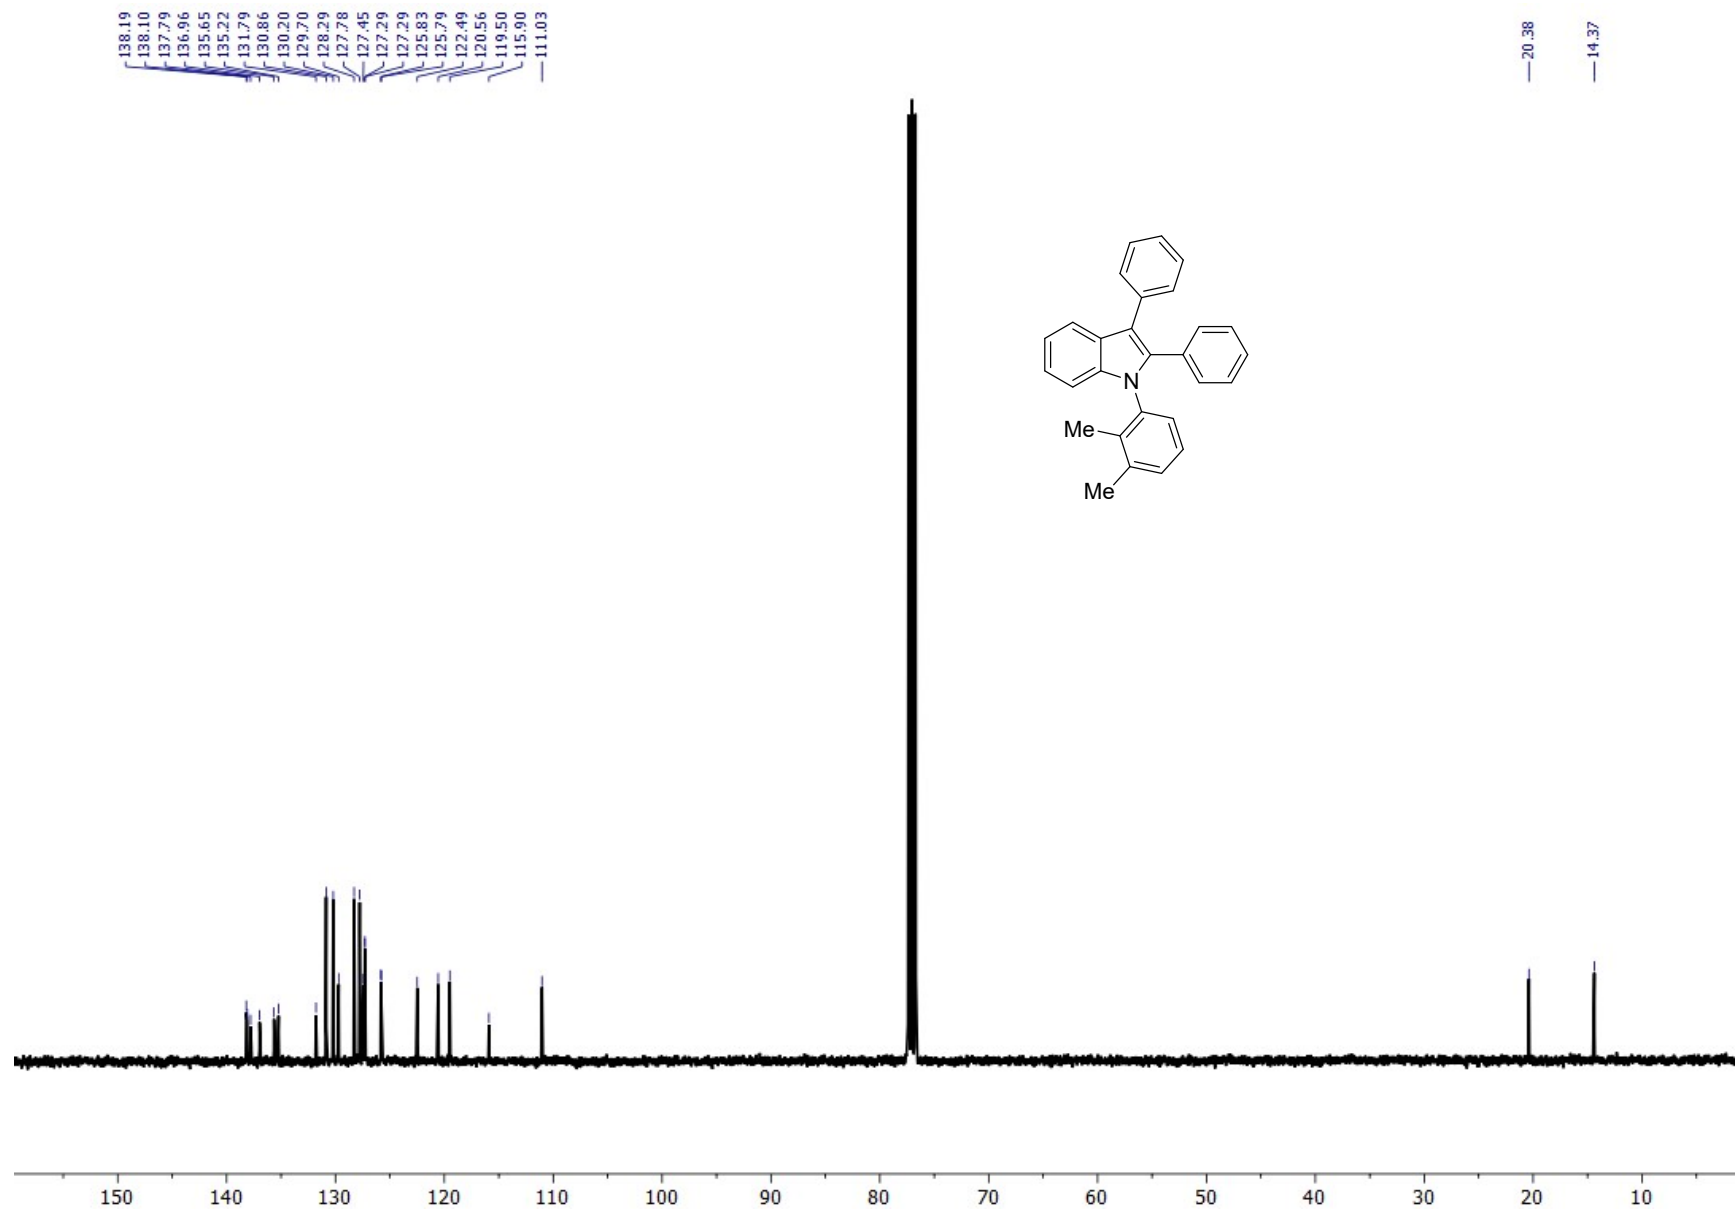

$^1\text{H}$  NMR of Compound **33** ( $\text{CDCl}_3$ , 500 MHz)

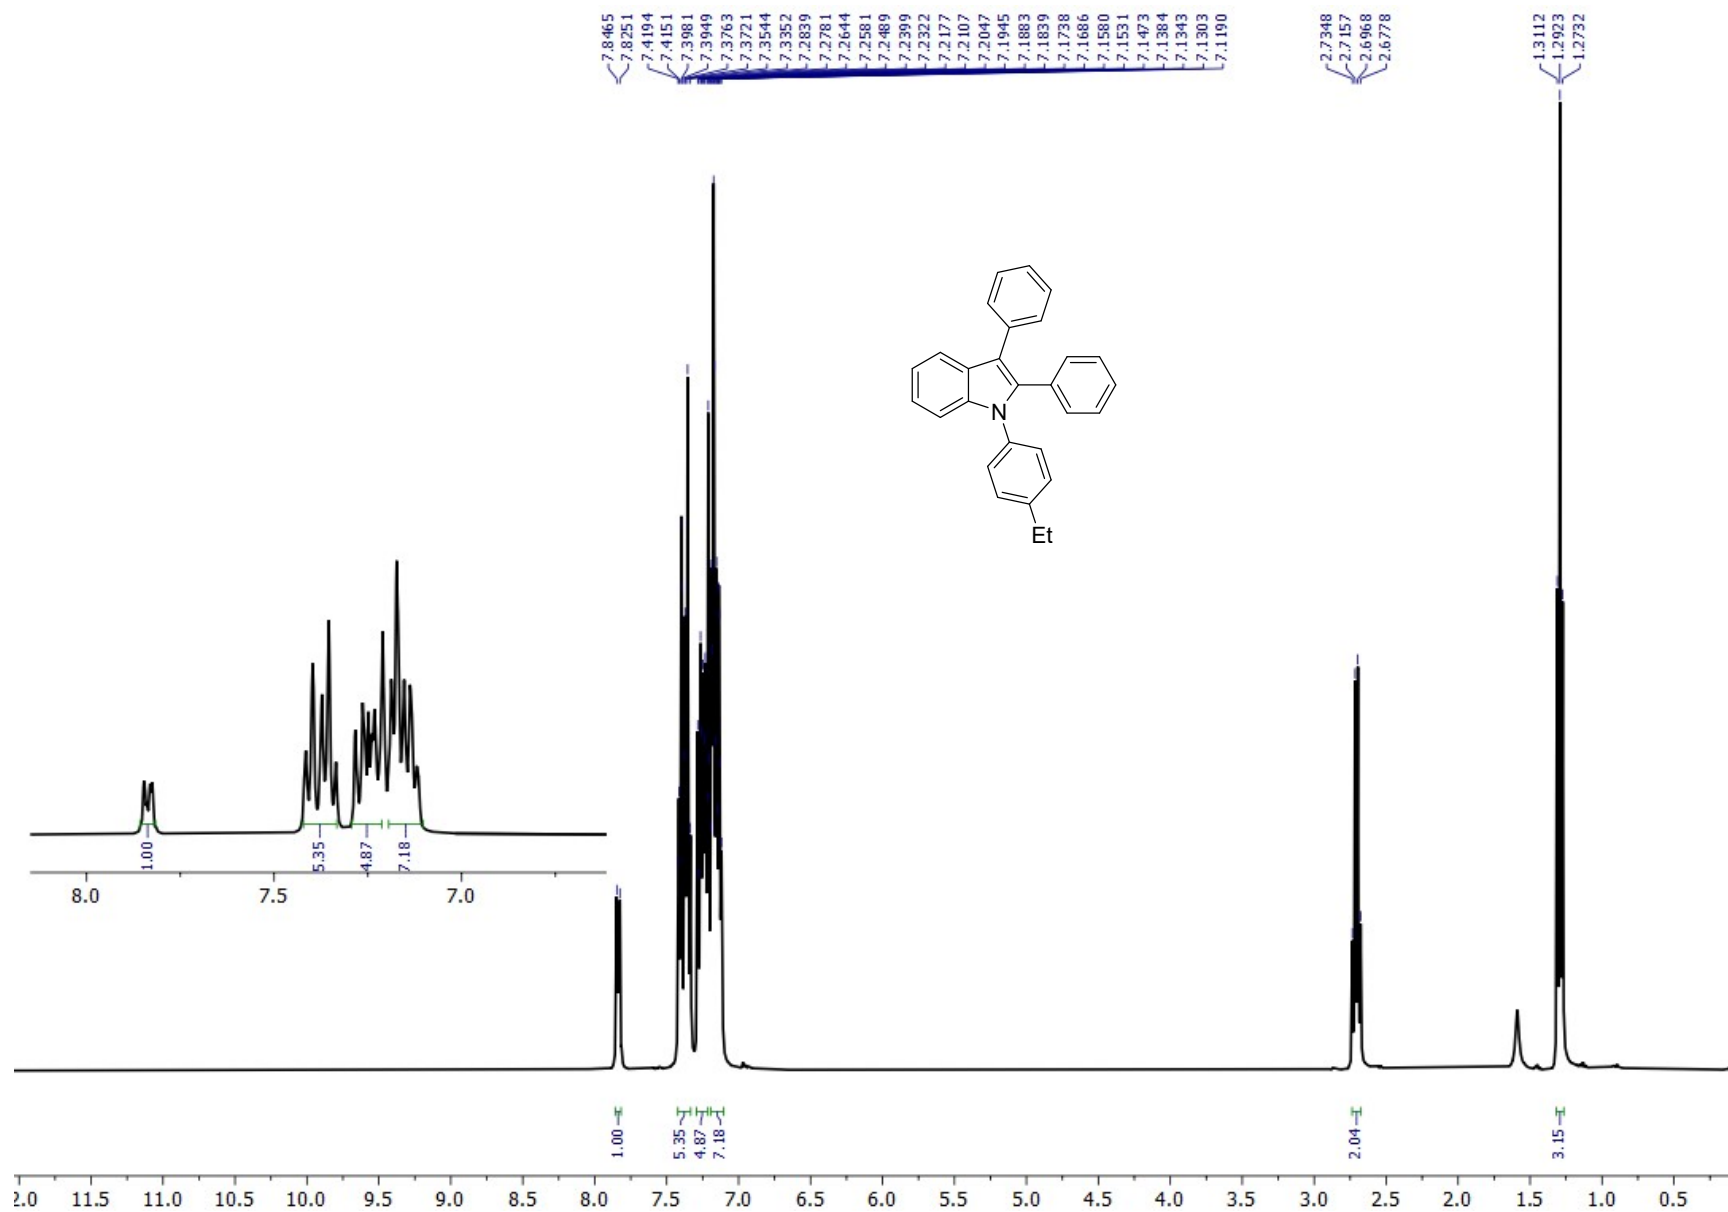

$^{13}\text{C}$  NMR of compound **33** ( $\text{CDCl}_3$ , 125 MHz)

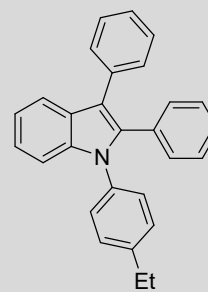

<sup>1</sup>H NMR of Compound **34** (CDCl<sub>3</sub>, 500 MHz)

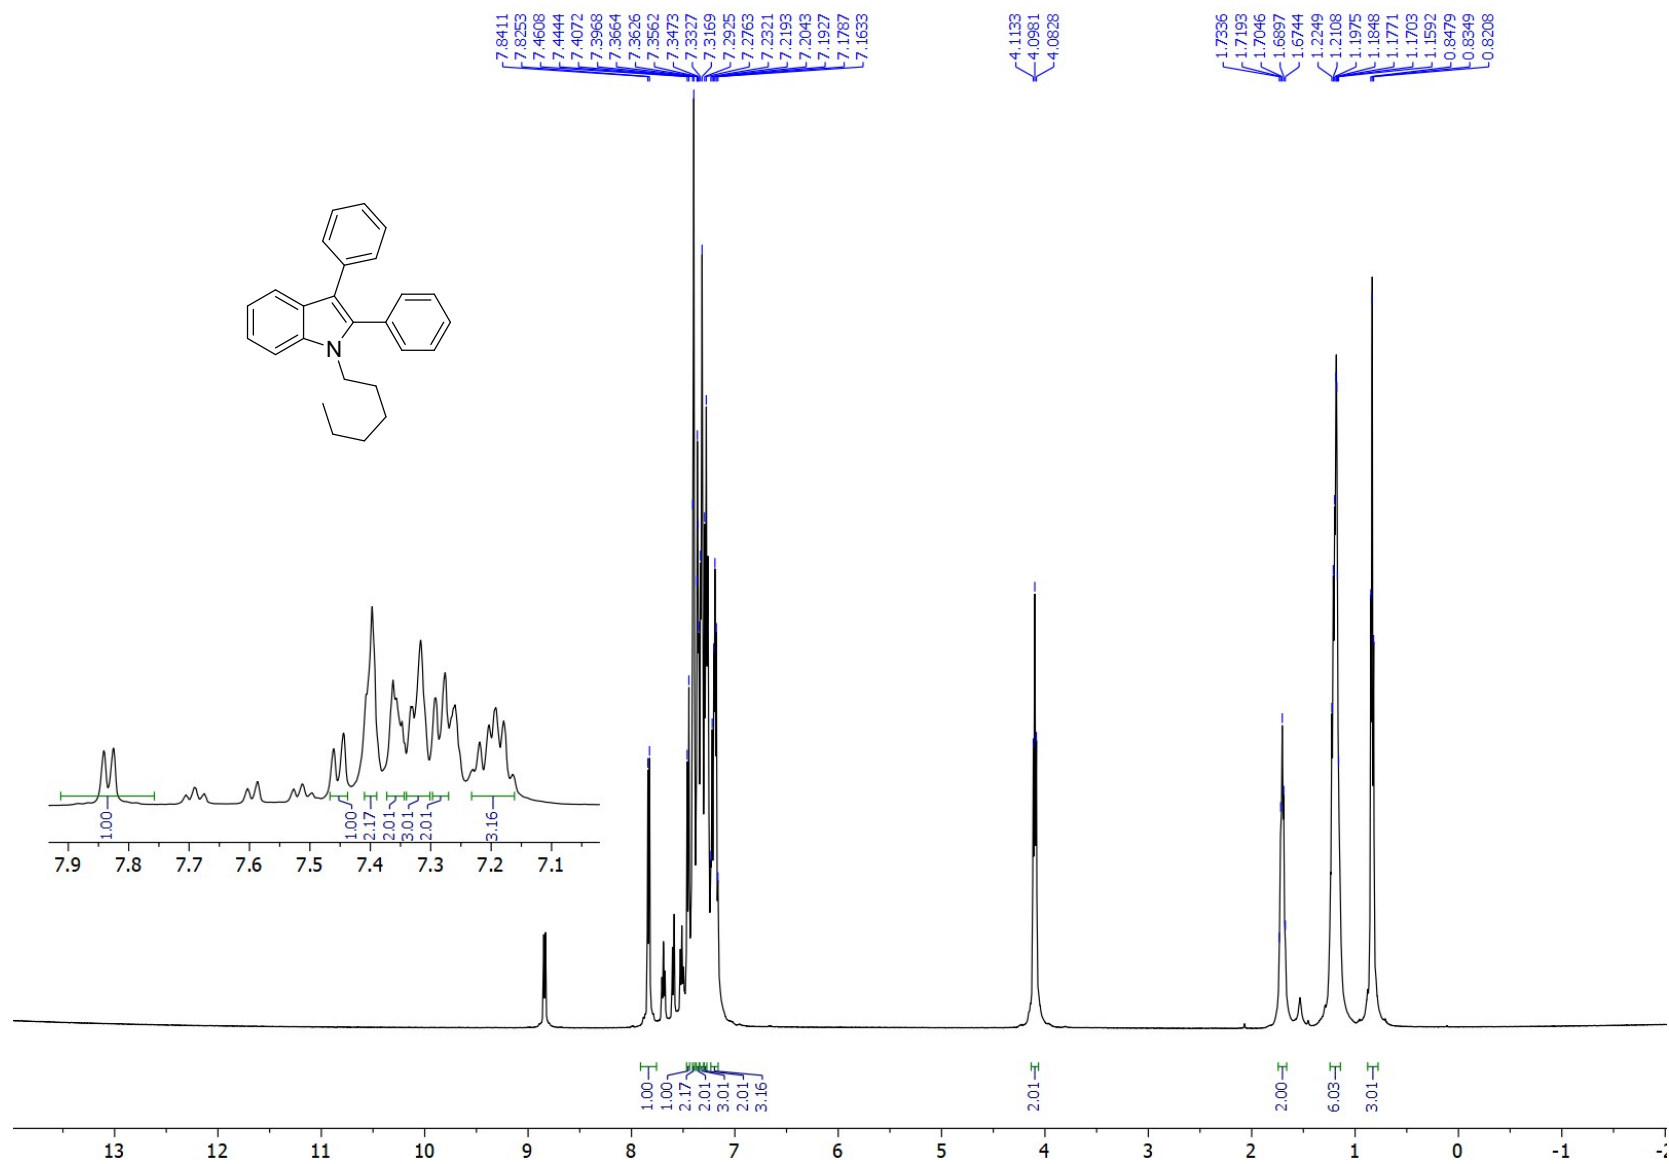

$^{13}\text{C}$  NMR of compound **34** ( $\text{CDCl}_3$ , 125 MHz)

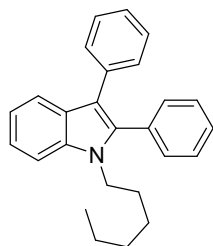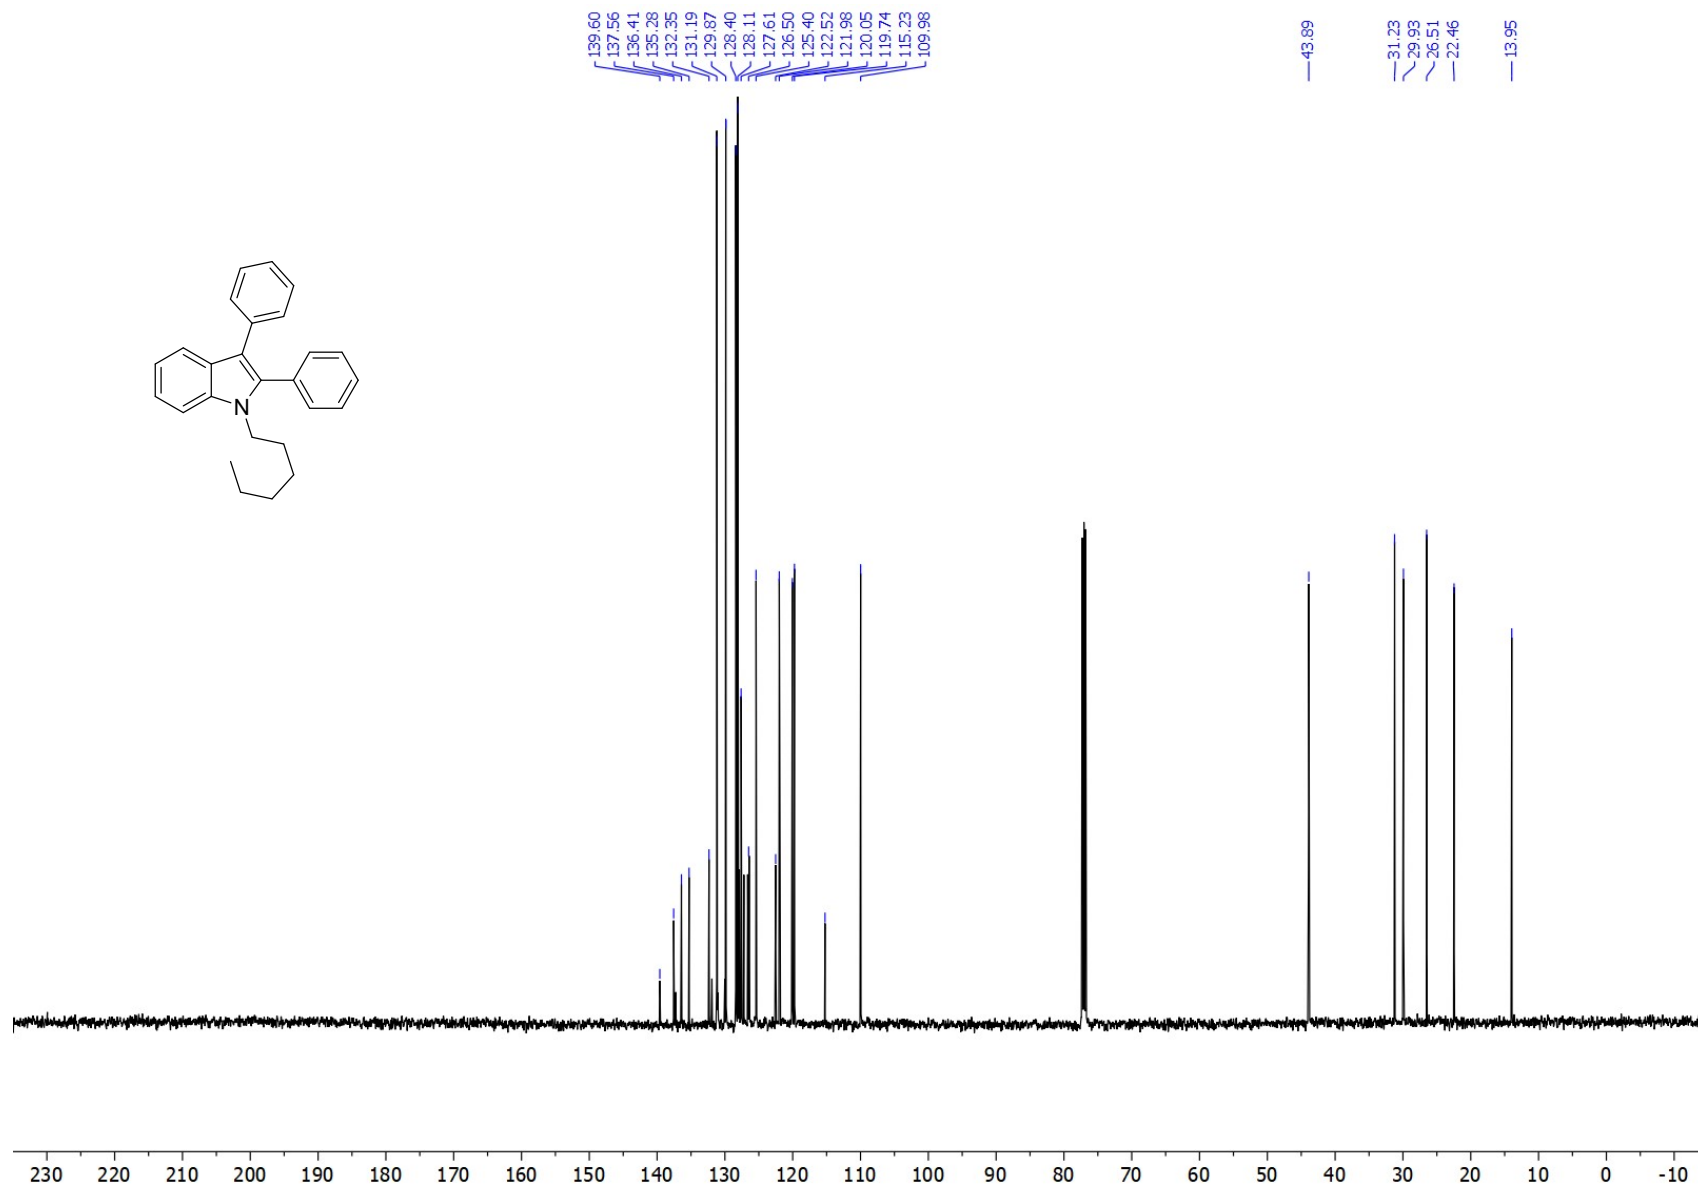

$^1\text{H}$  NMR of Compound **35** ( $\text{CDCl}_3$ , 500 MHz)

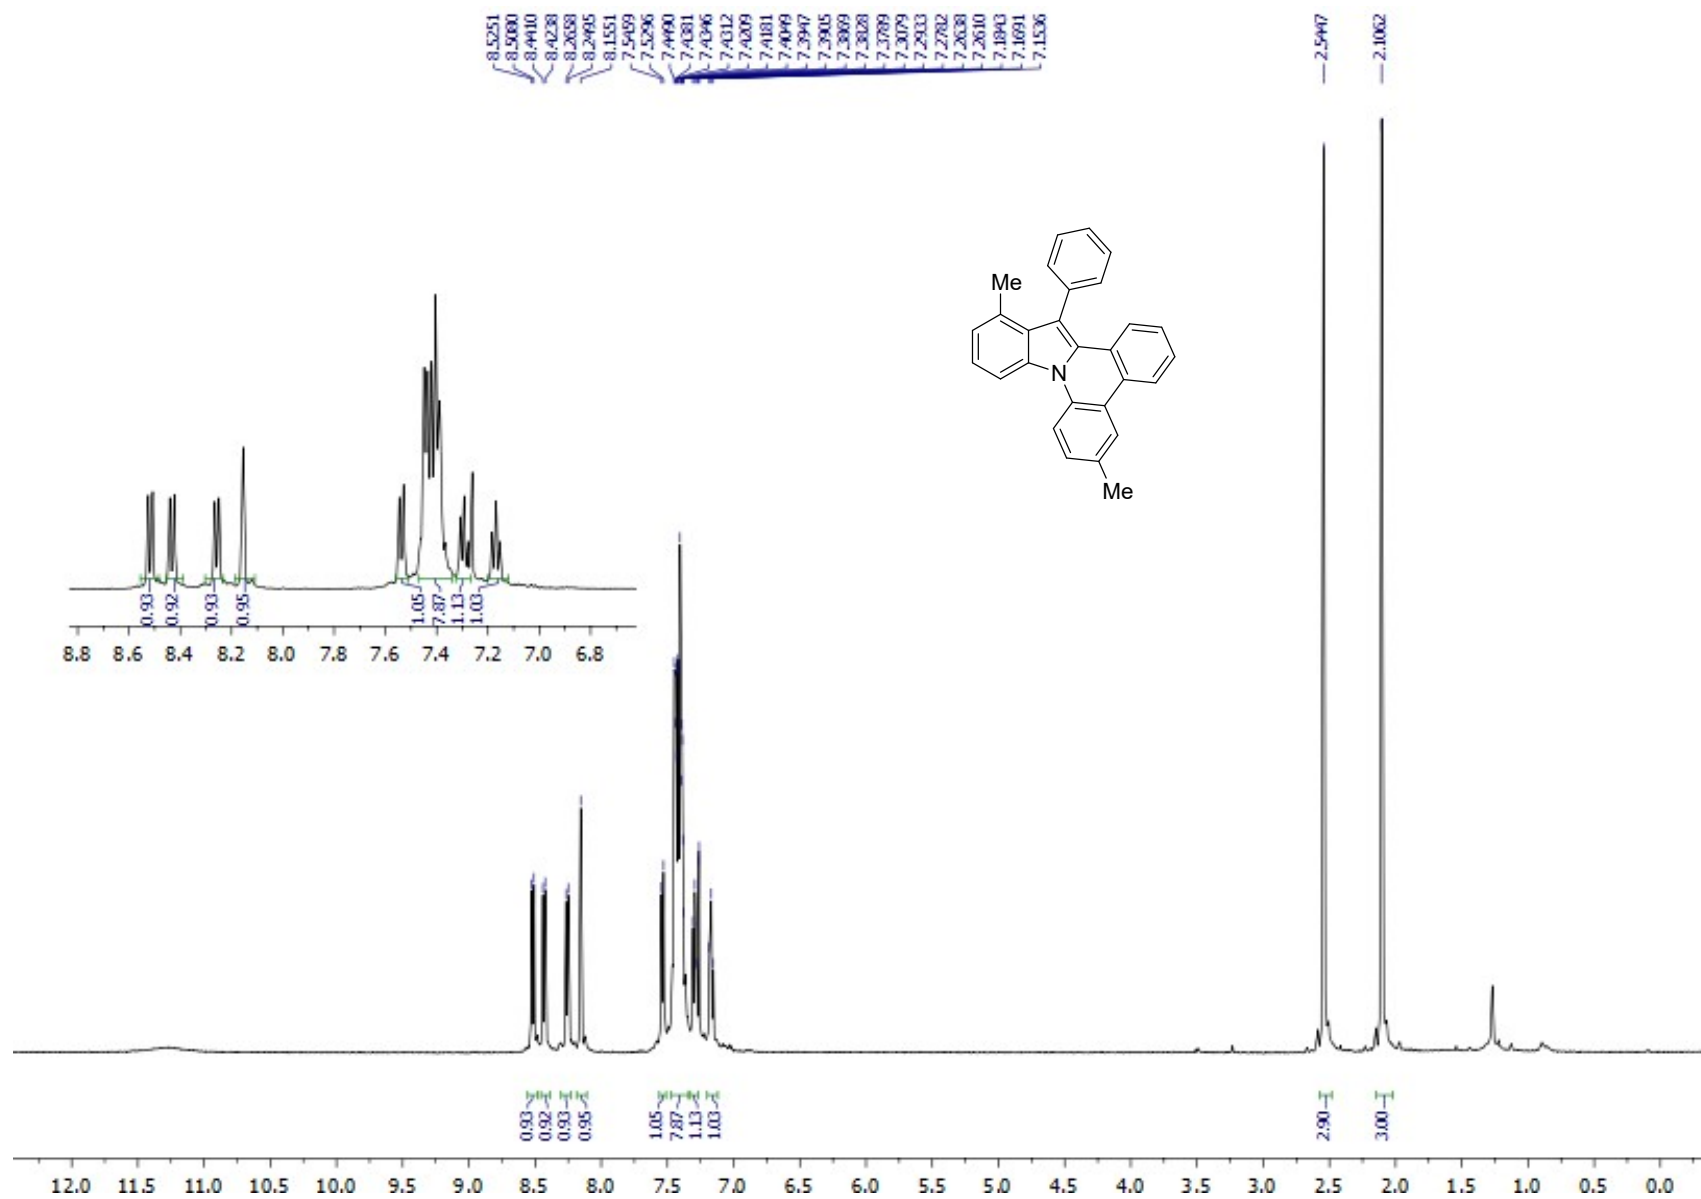



$^{13}\text{C}$  NMR of compound **35** ( $\text{CDCl}_3$ , 125 MHz)

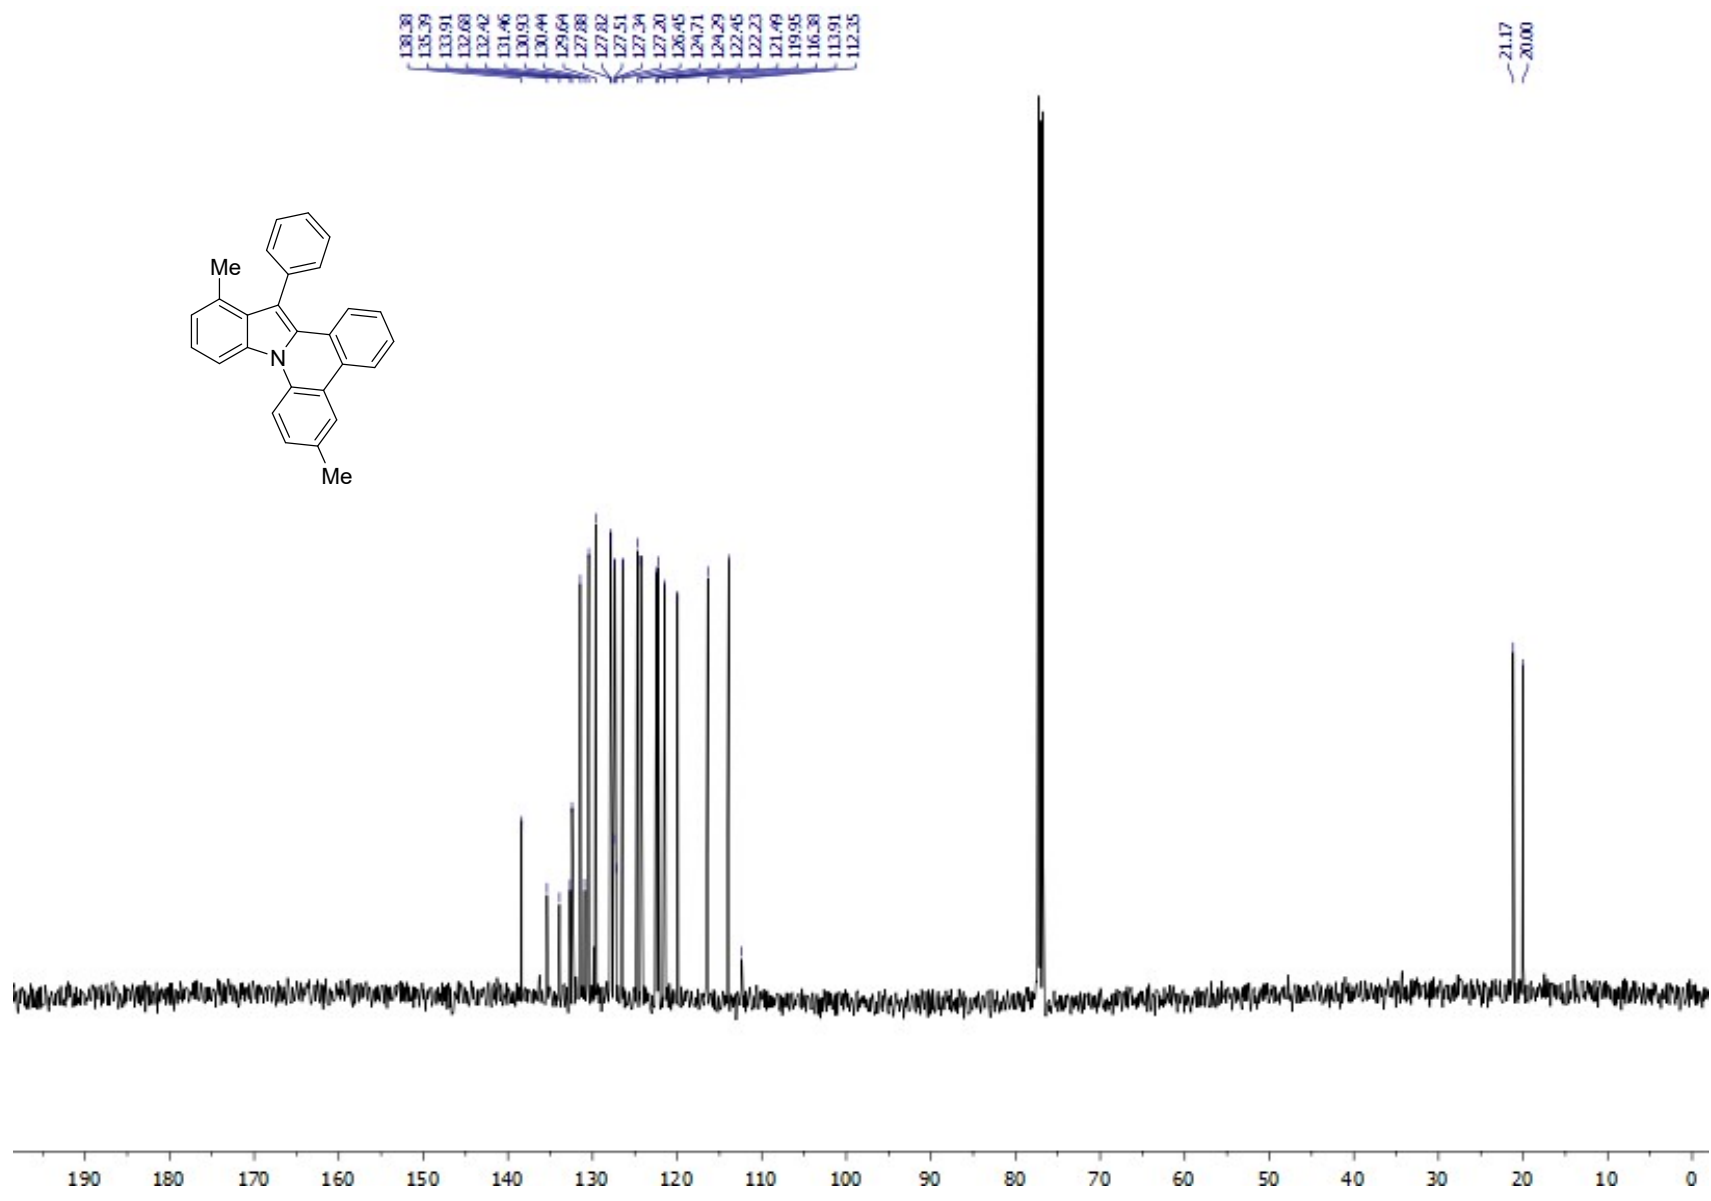

<sup>1</sup>H NMR of Compound **36** (CDCl<sub>3</sub>, 500 MHz)

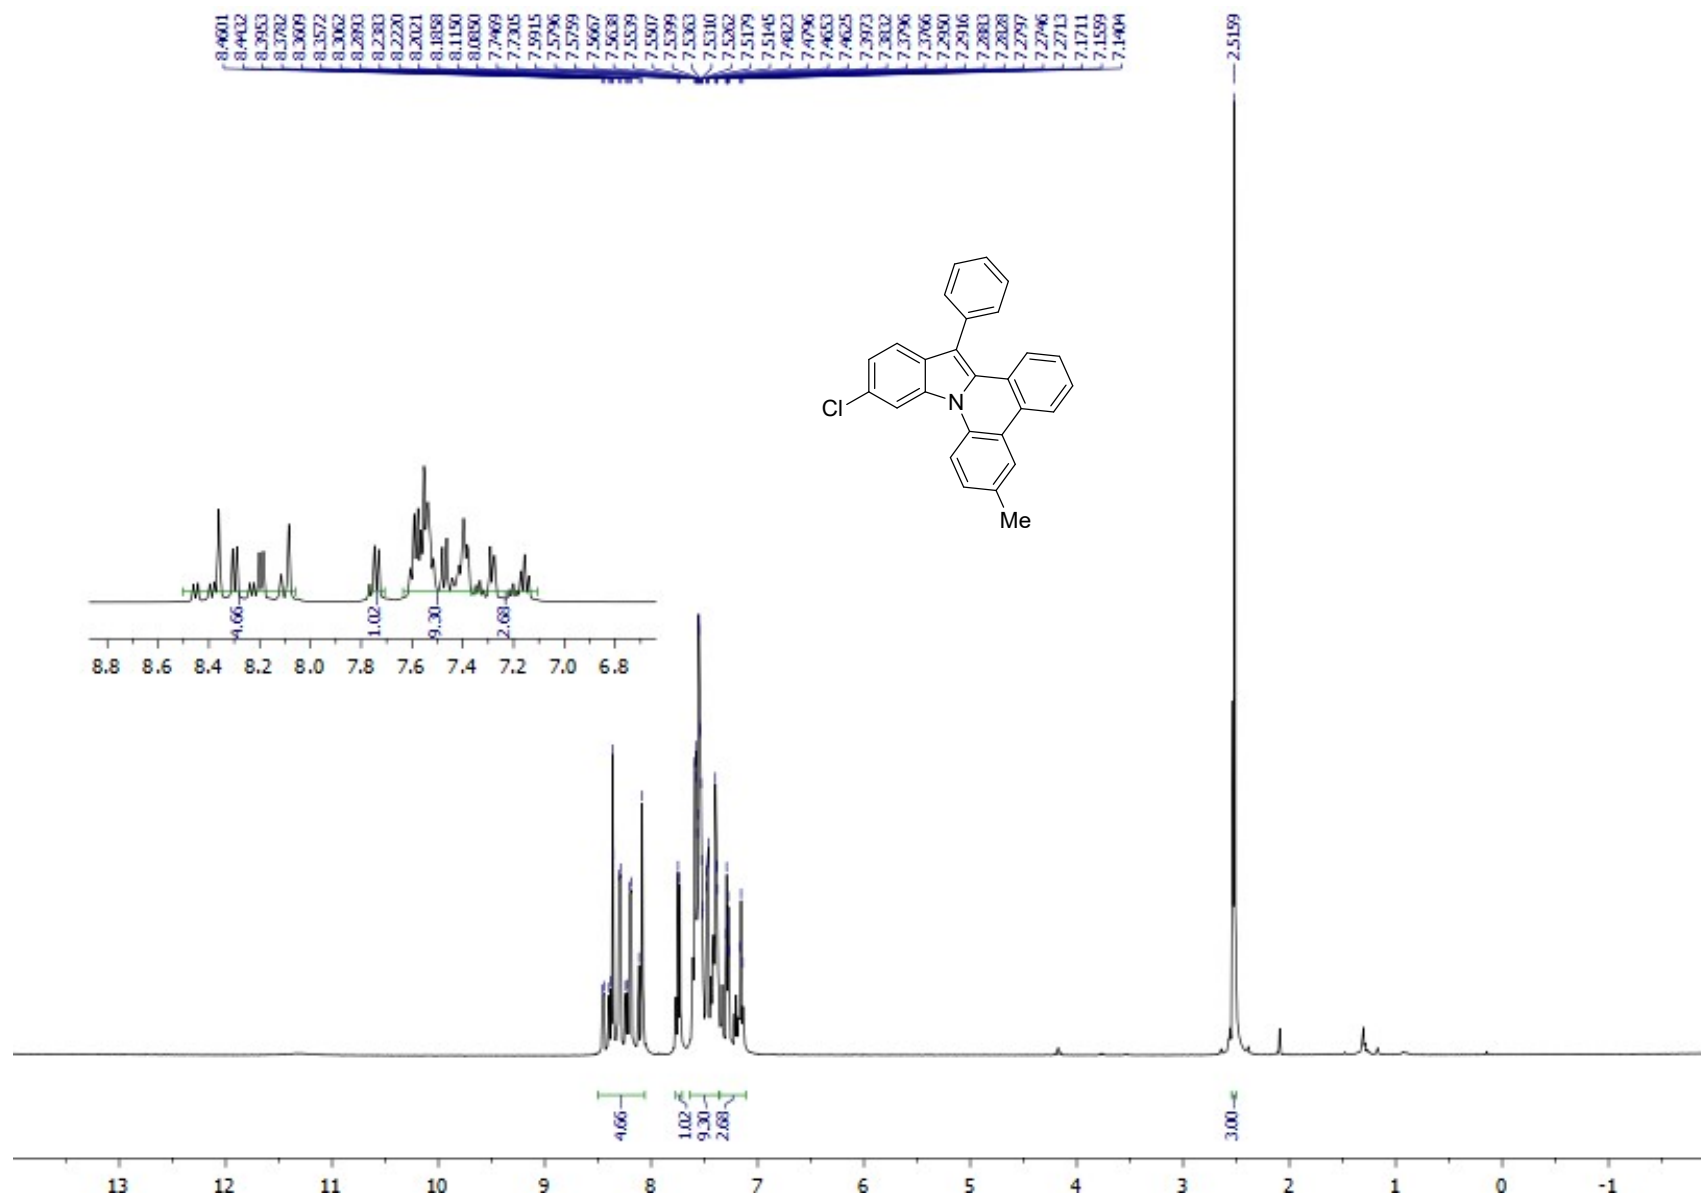

$^{13}\text{C}$  NMR of compound **36** ( $\text{CDCl}_3$ , 125 MHz)

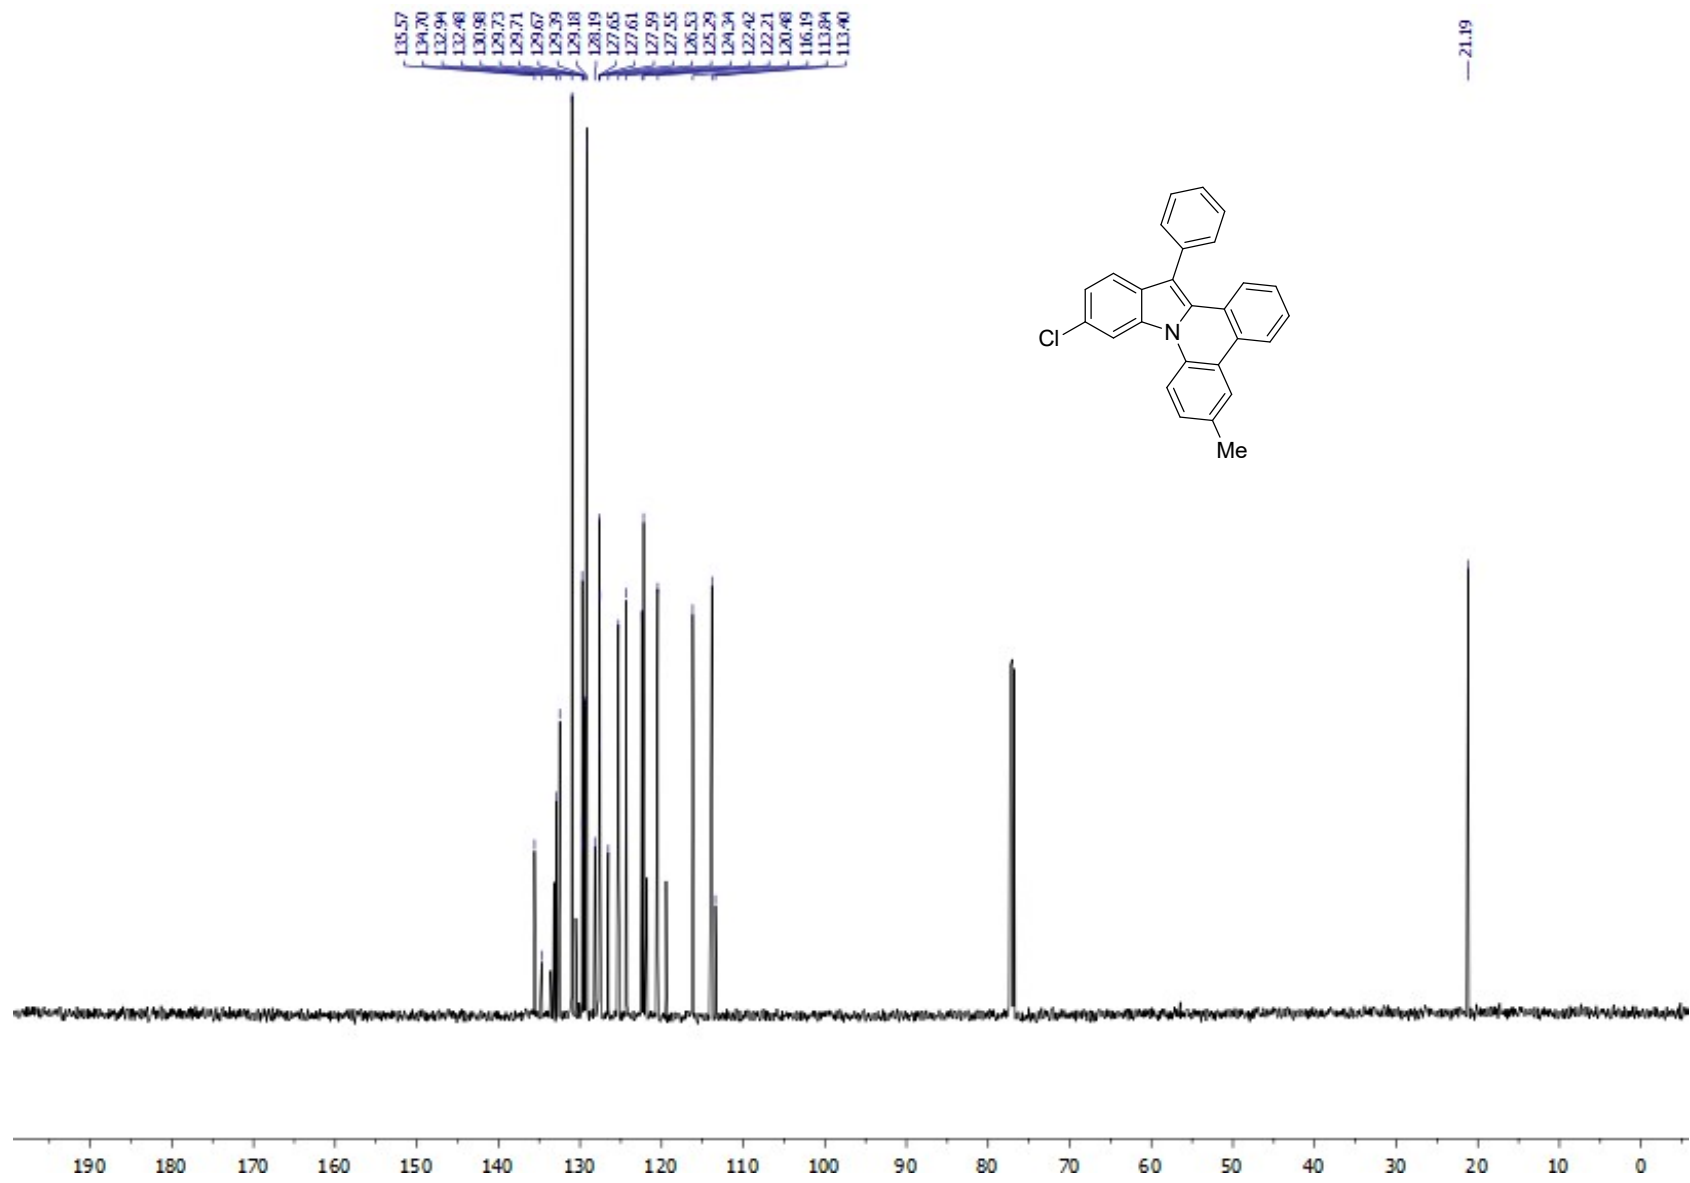

<sup>1</sup>H NMR of Compound **37** (CDCl<sub>3</sub>, 500 MHz)

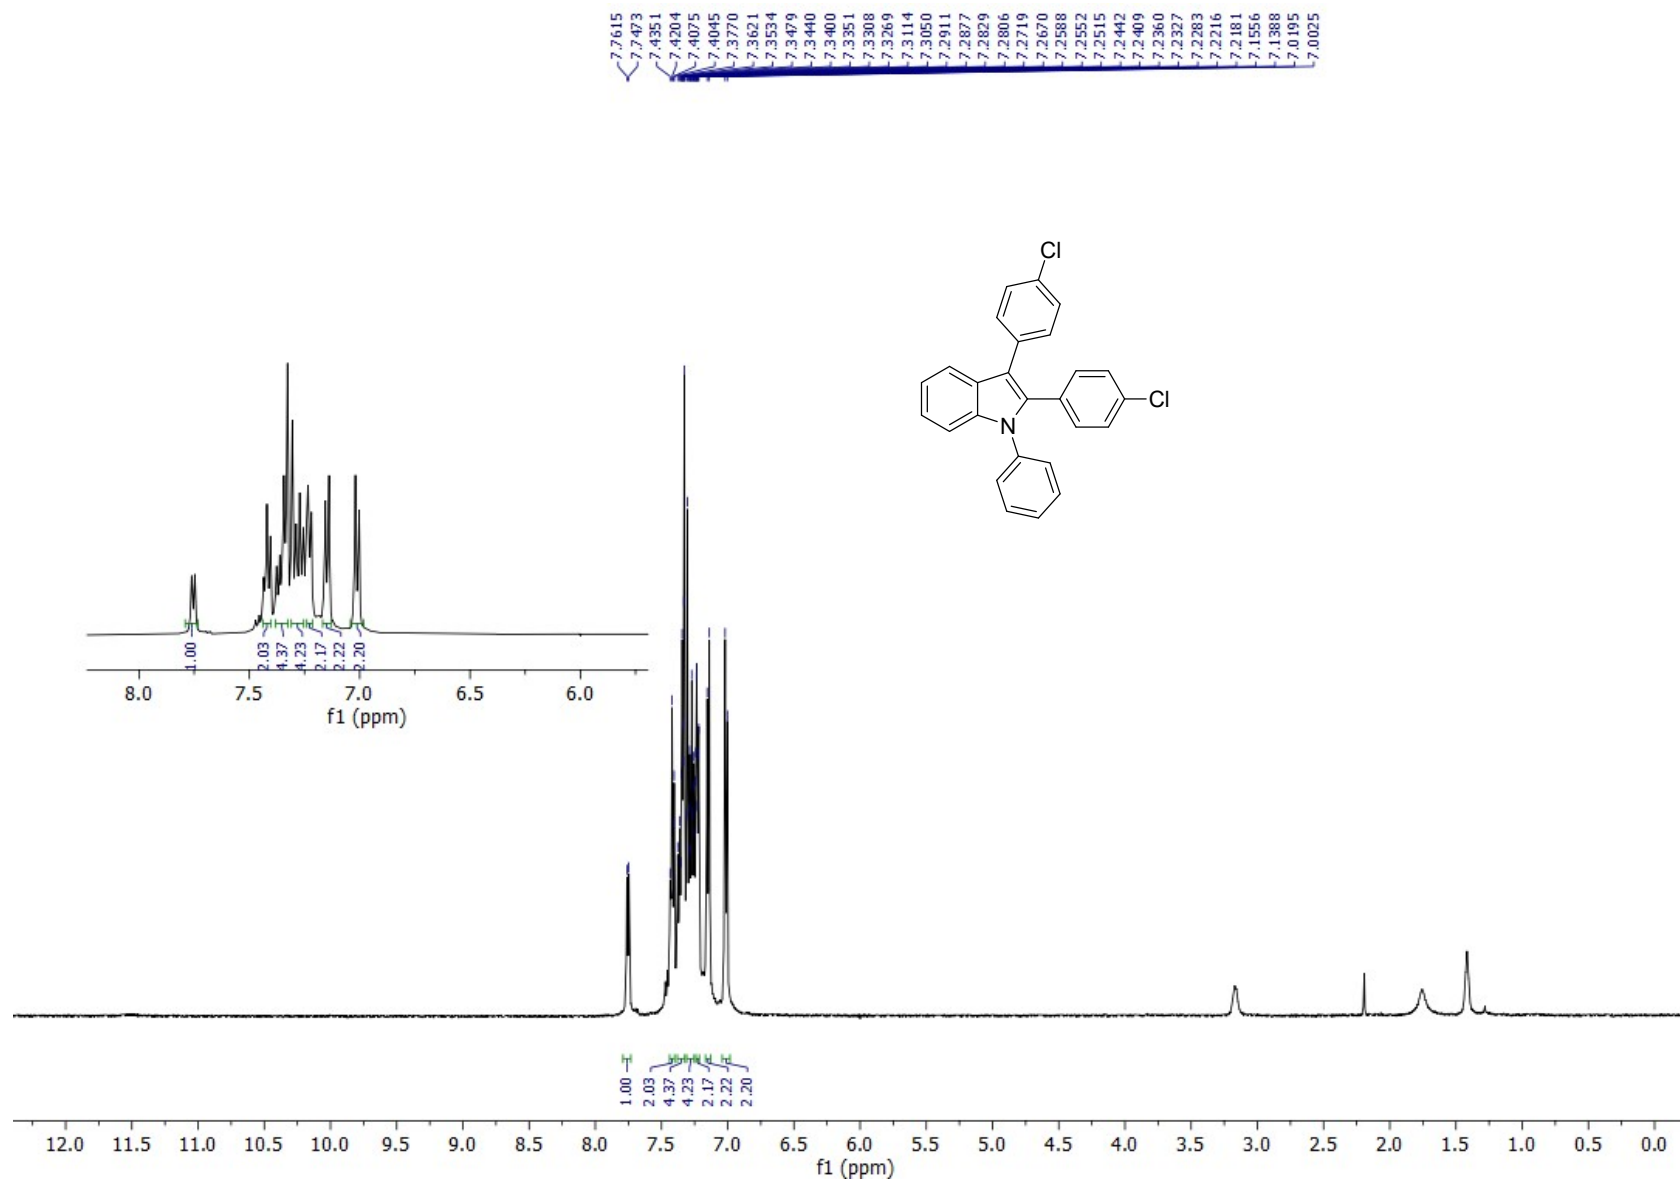

$^{13}\text{C}$  NMR of compound **37** ( $\text{CDCl}_3$ , 125 MHz)

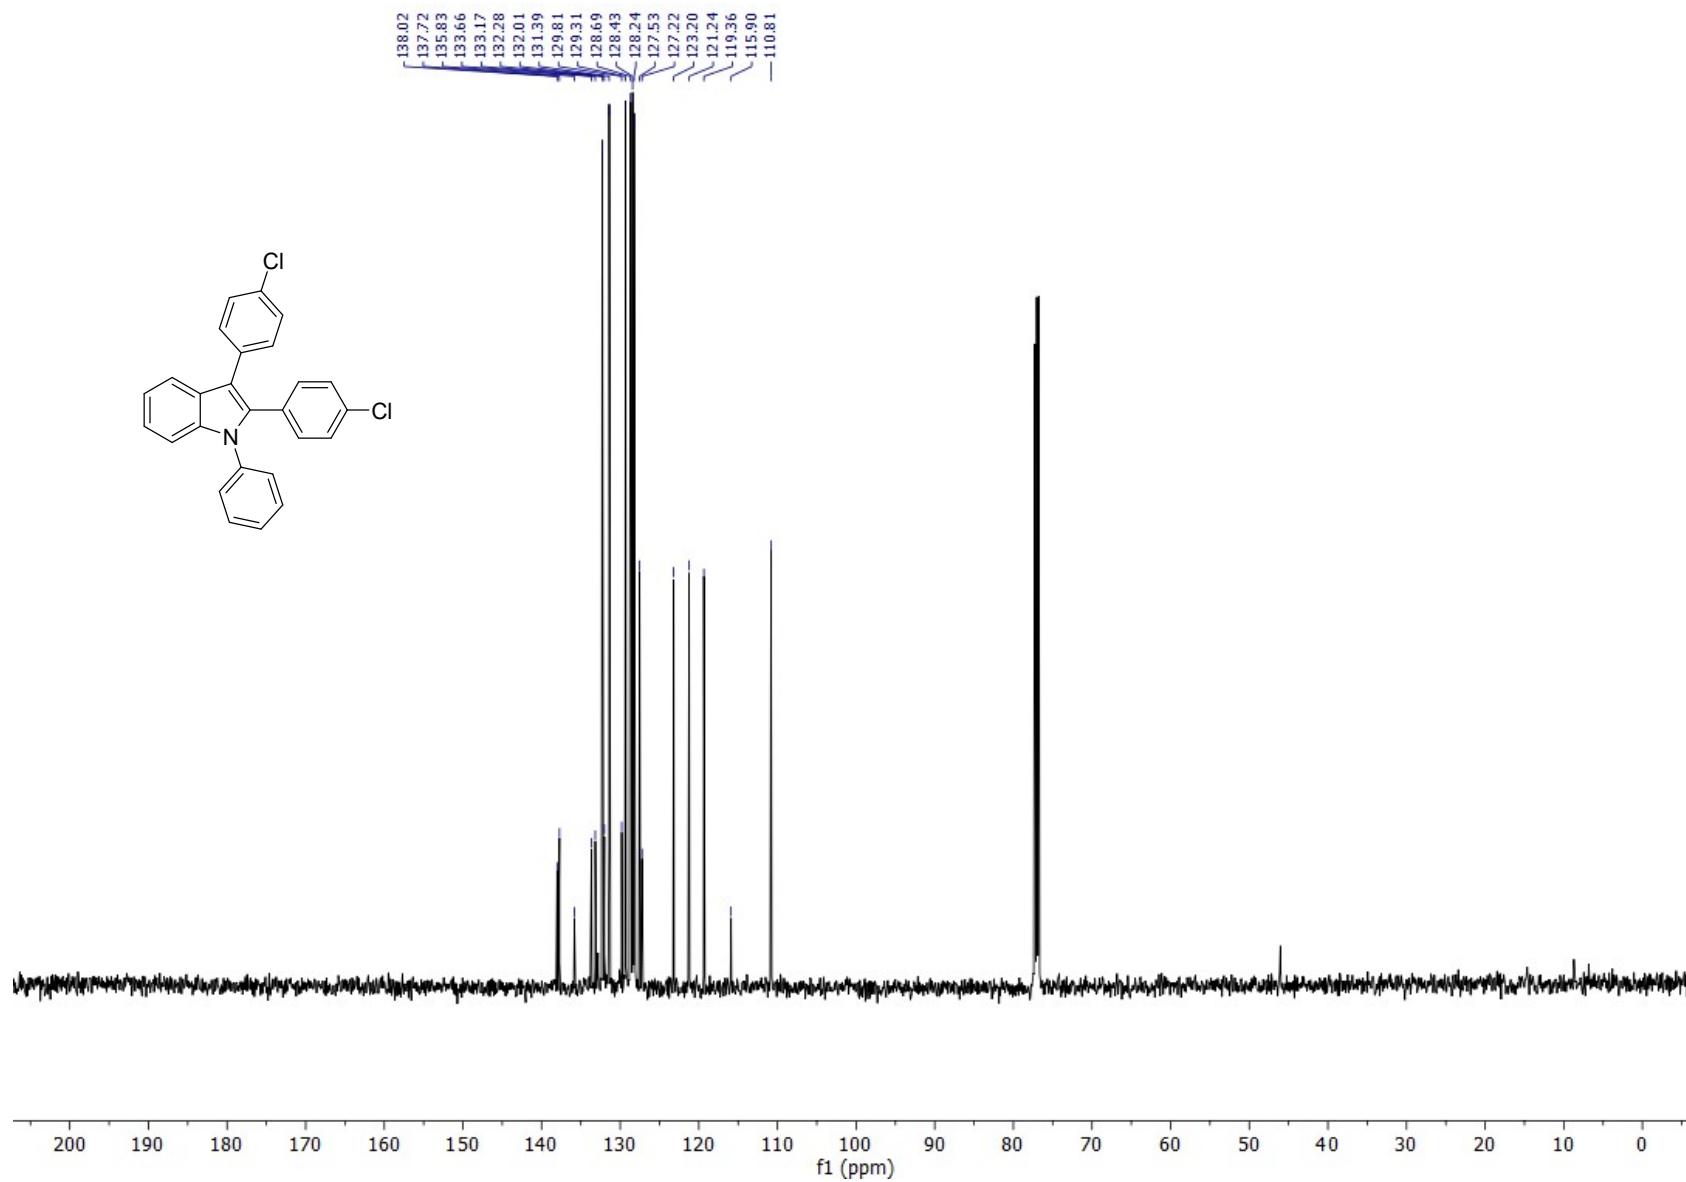

<sup>1</sup>H NMR of Compound **38** (CDCl<sub>3</sub>, 500 MHz)

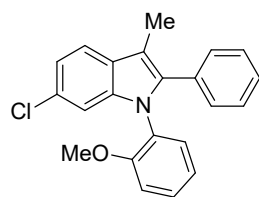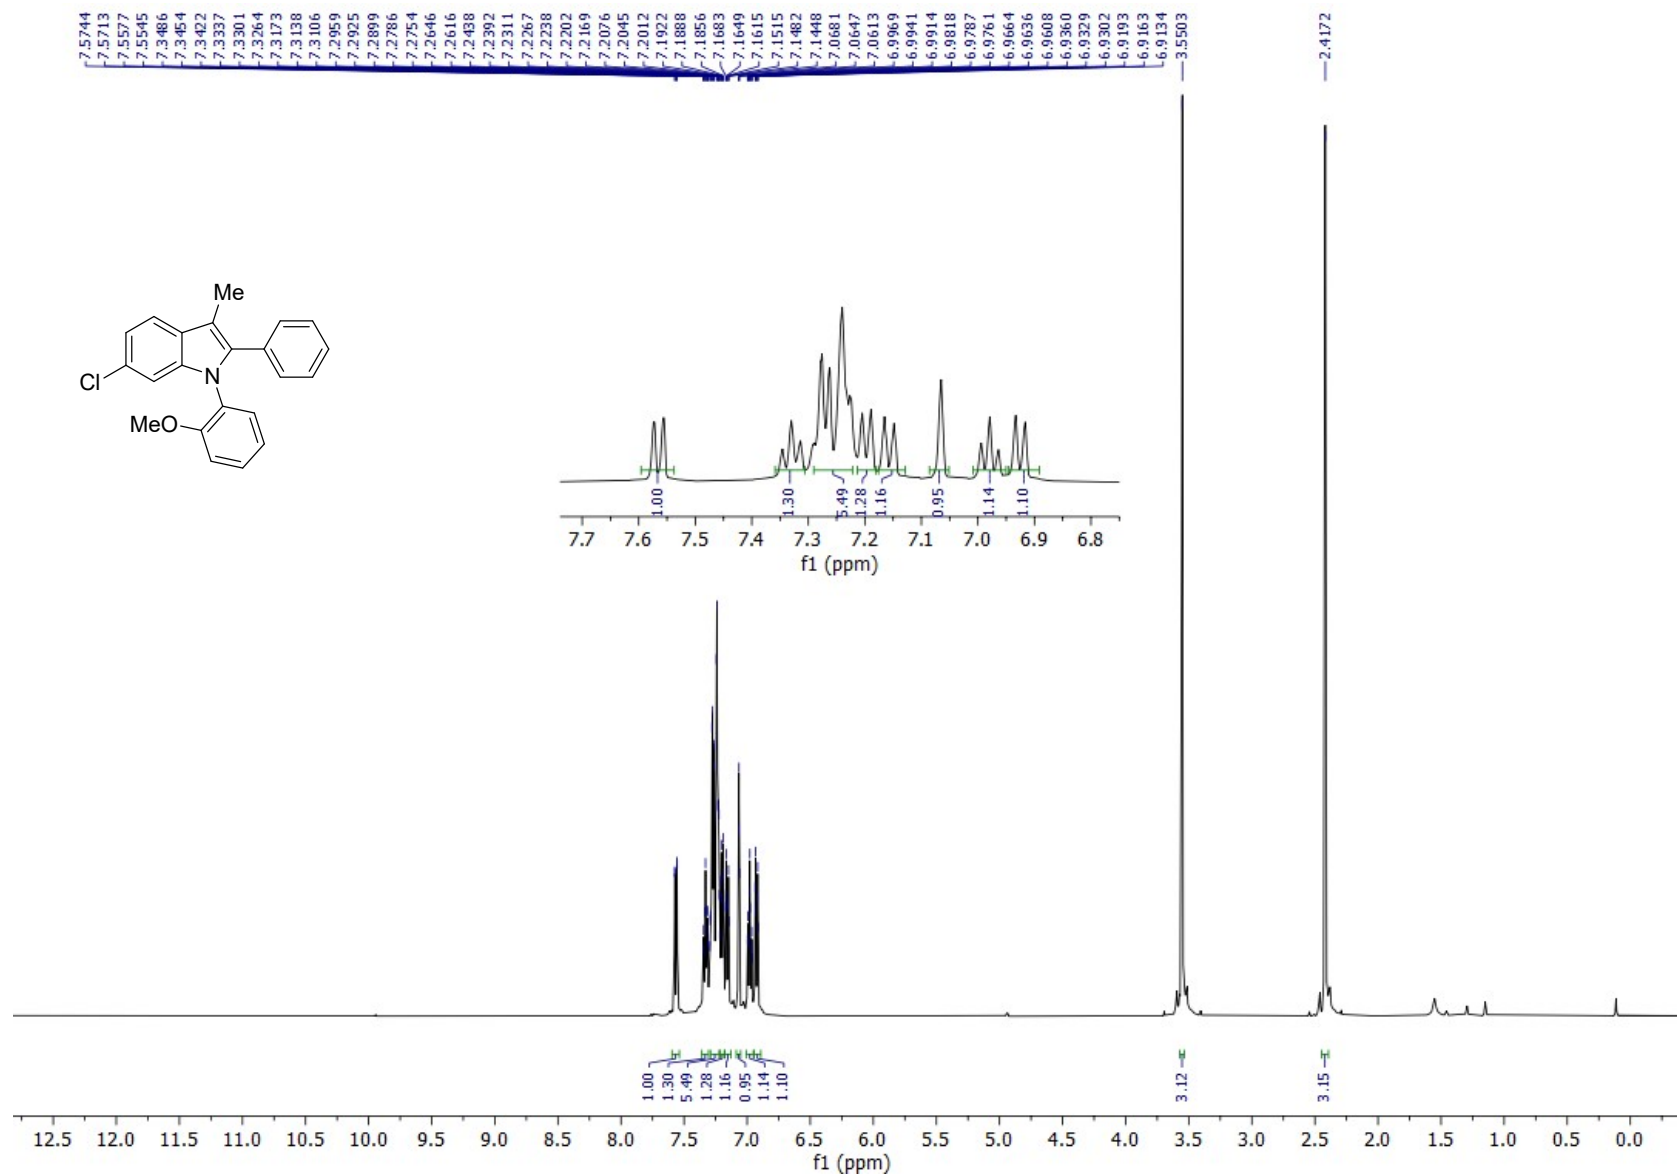

$^{13}\text{C}$  NMR of compound **38** ( $\text{CDCl}_3$ , 125 MHz)

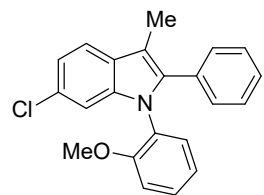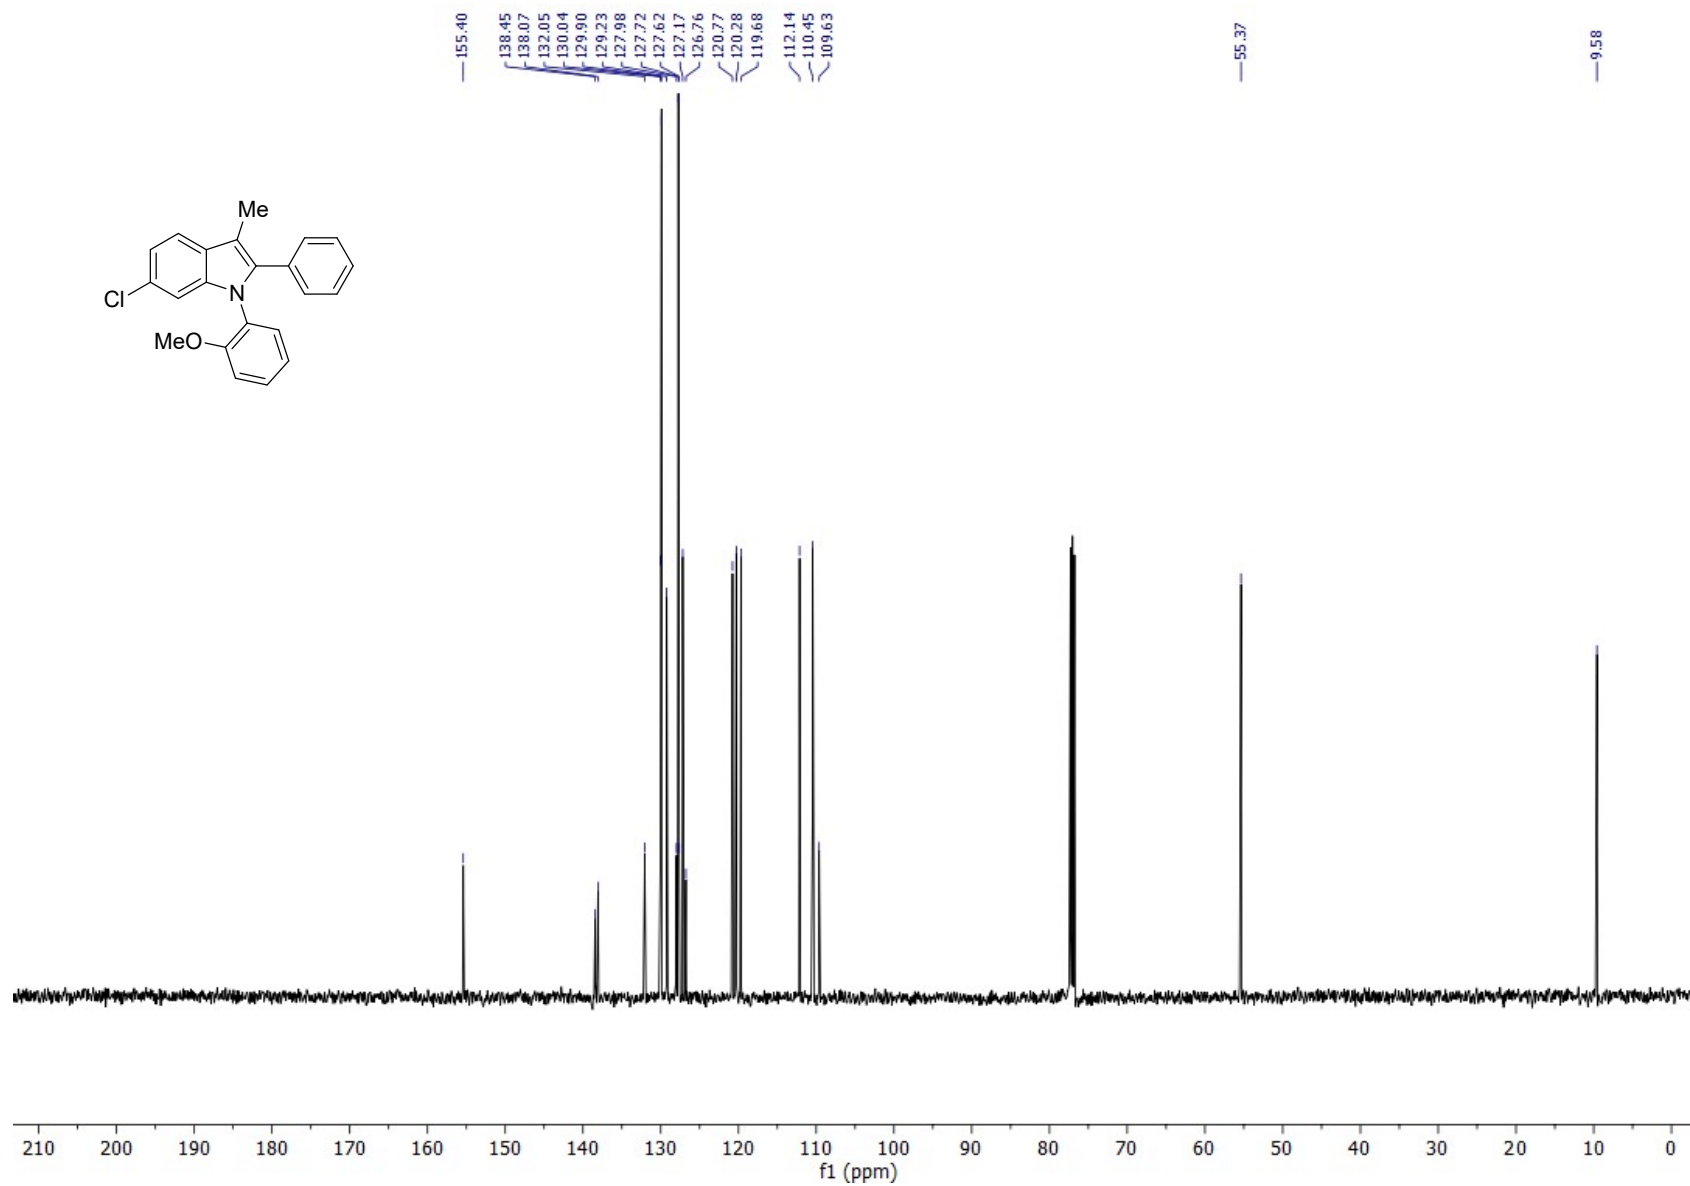

$^1\text{H}$  NMR of Compound **39** ( $\text{CDCl}_3$ , 500 MHz)

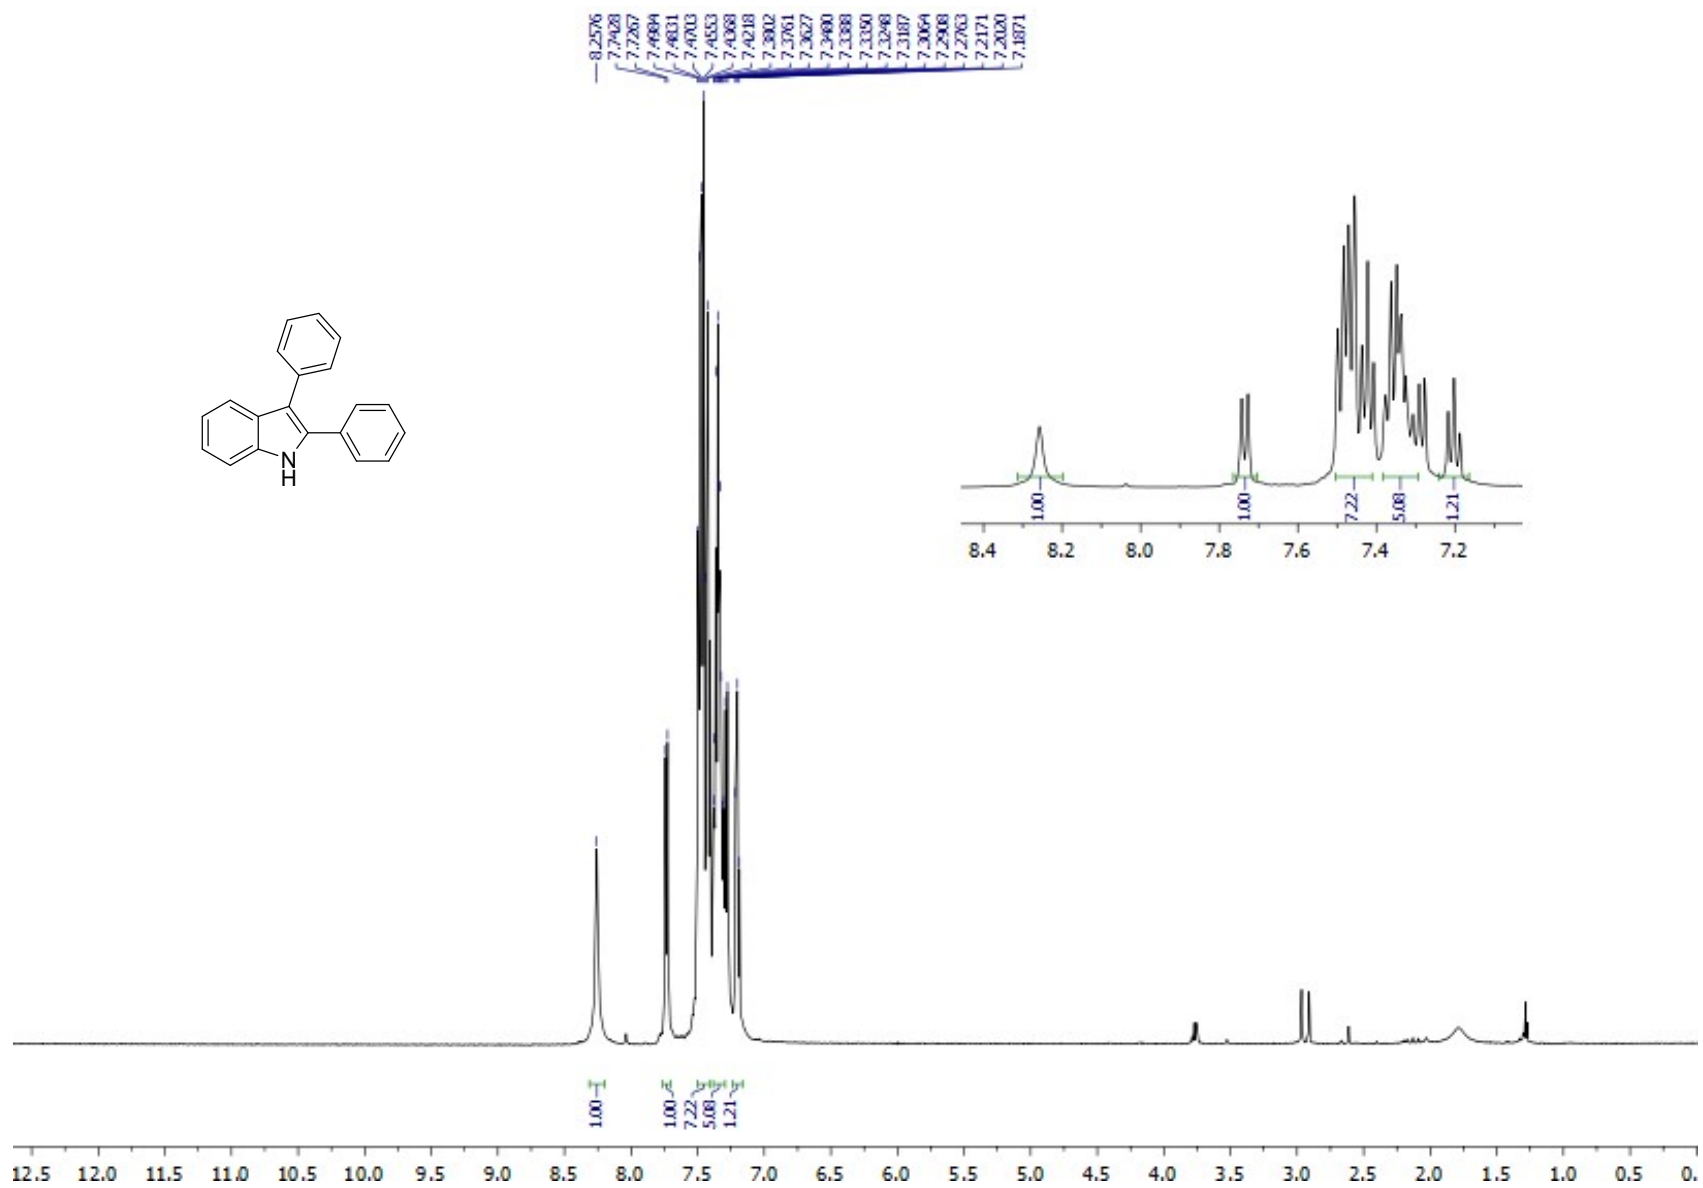



$^{13}\text{C}$  NMR of compound **39** ( $\text{CDCl}_3$ , 125 MHz)

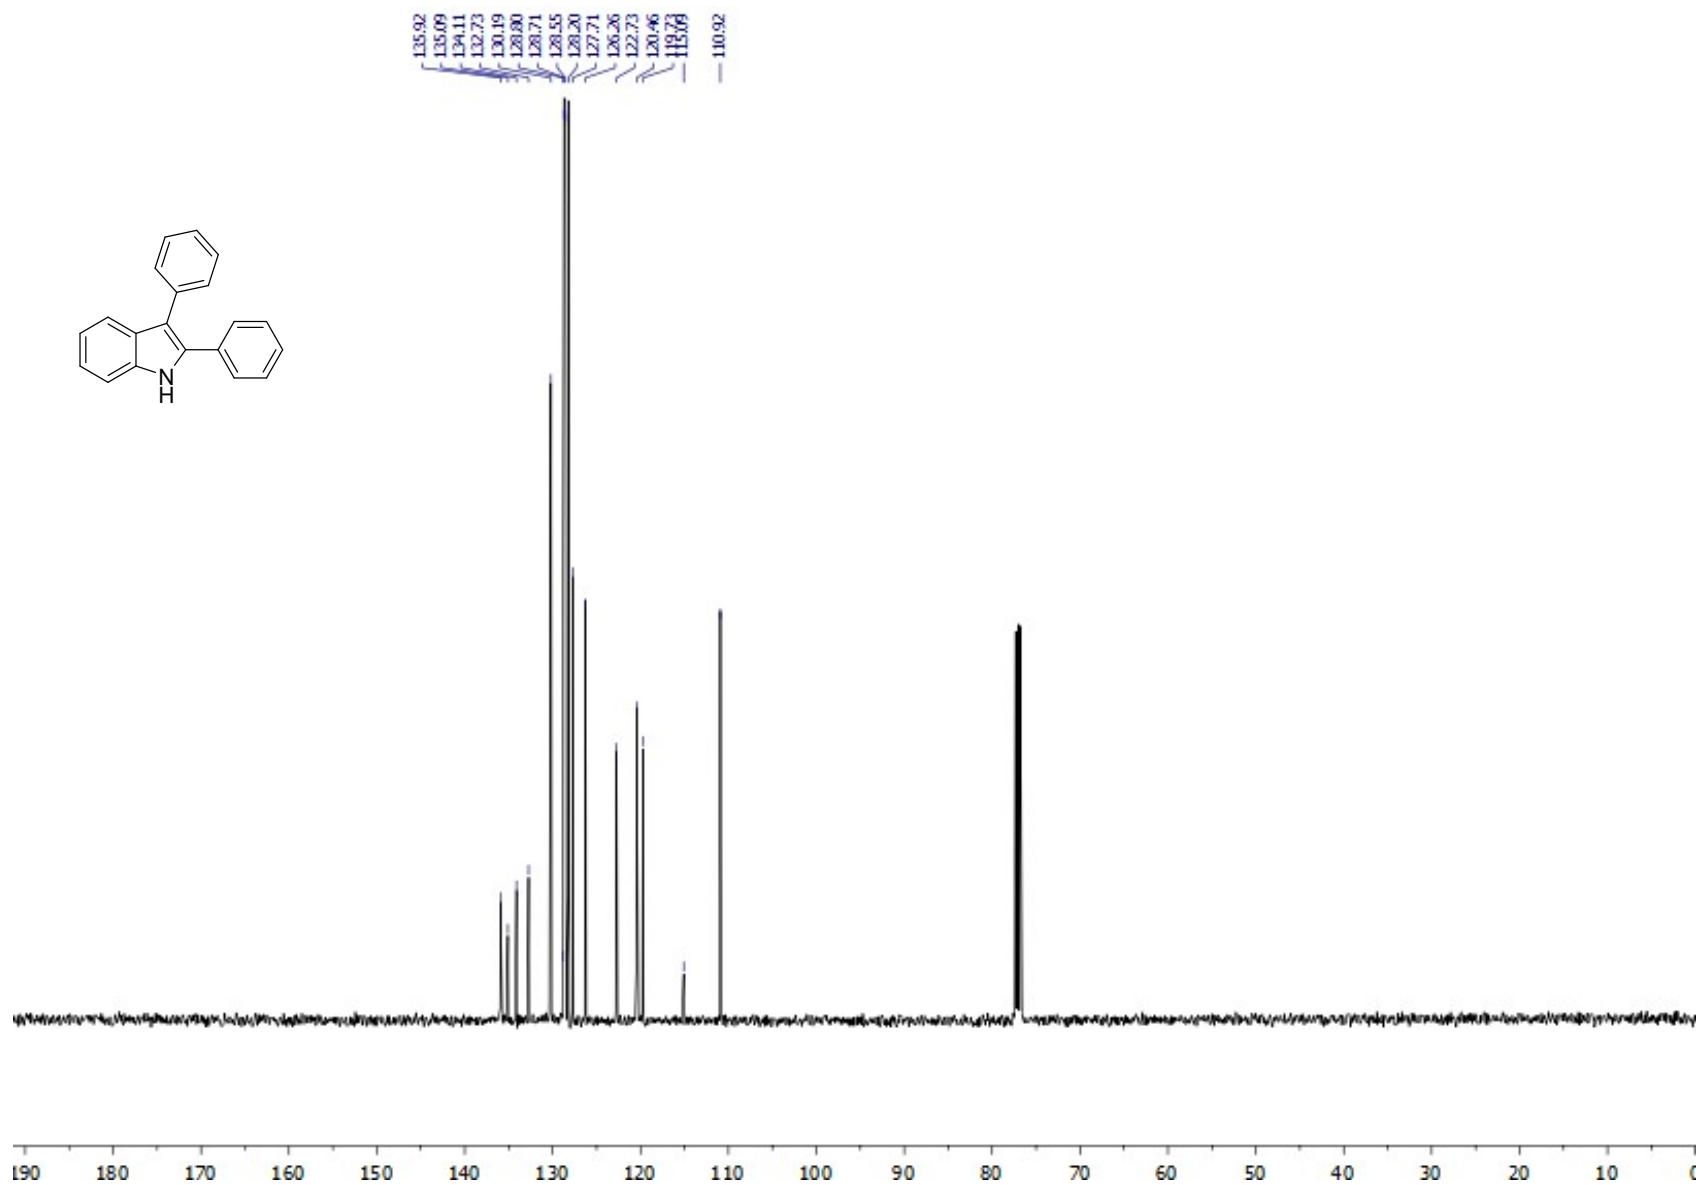

$^1\text{H}$  NMR of Compound **40** ( $\text{CDCl}_3$ , 500 MHz)

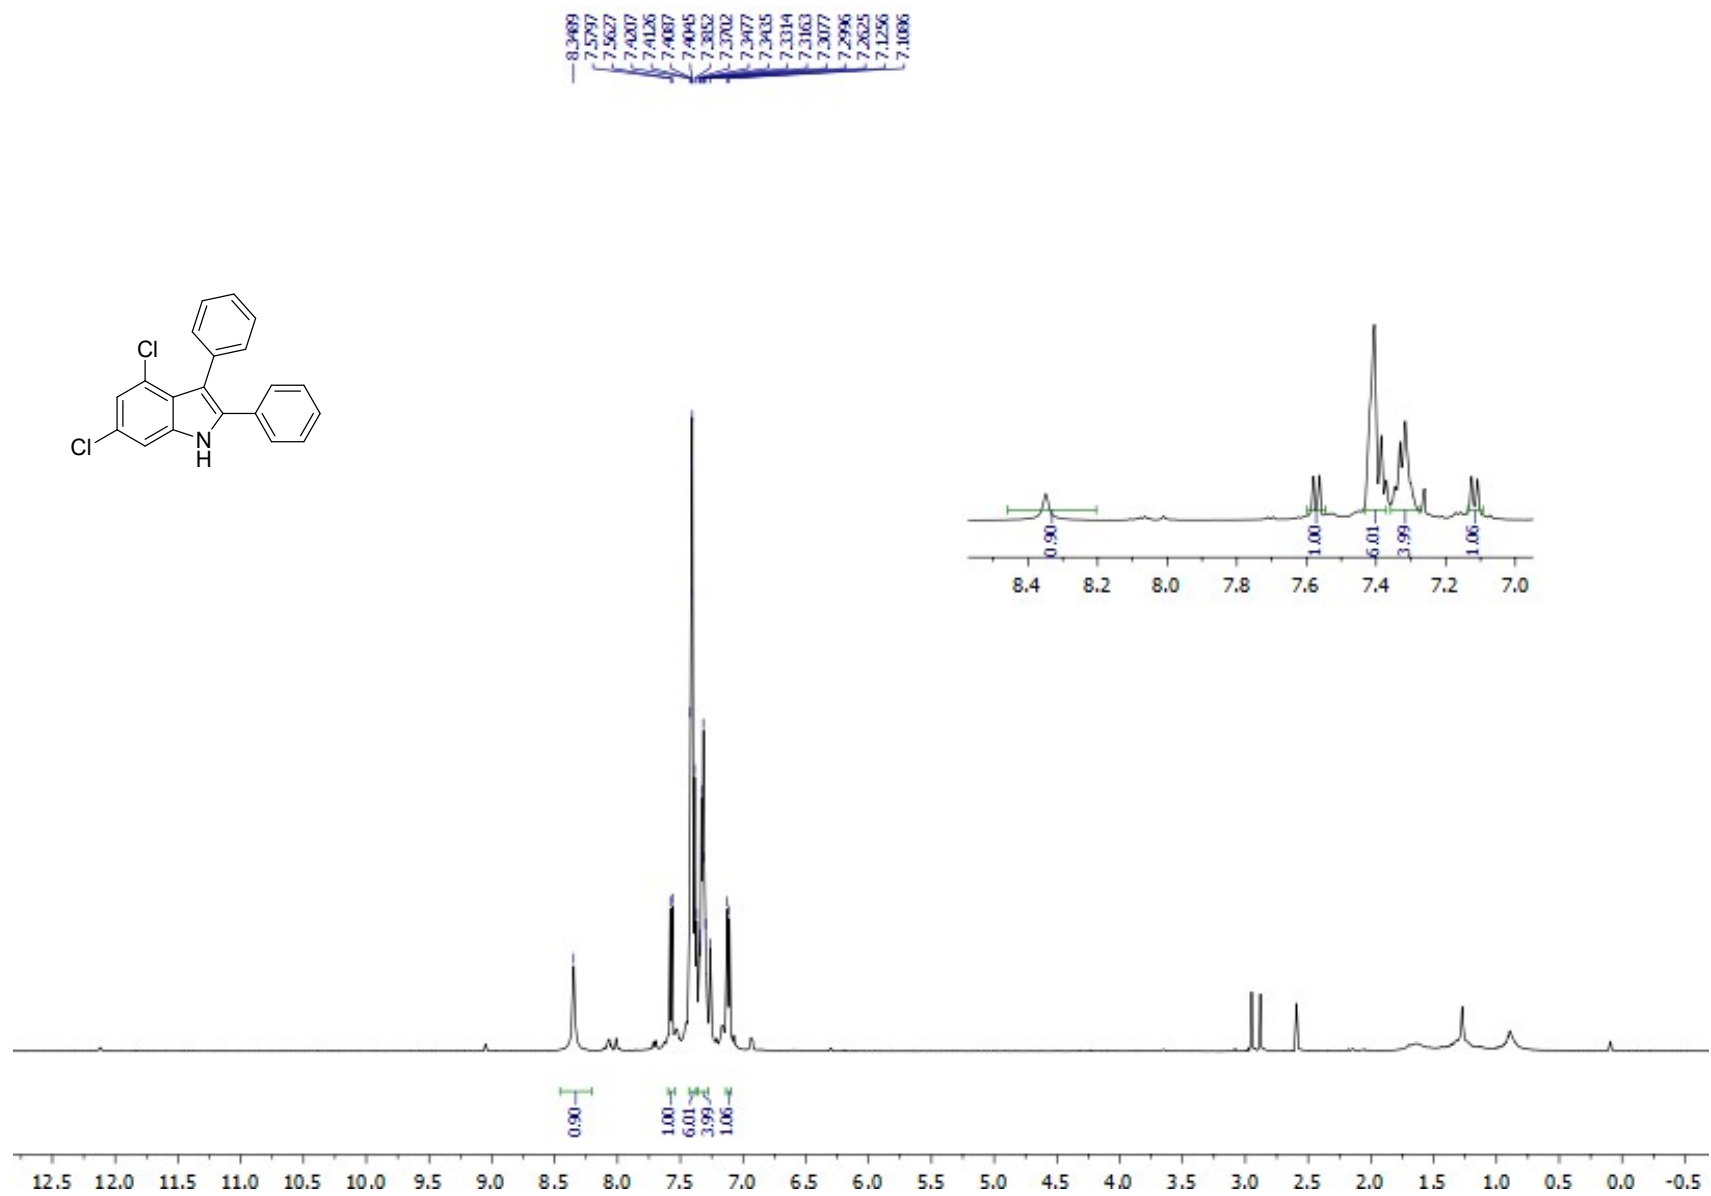

$^{13}\text{C}$  NMR of compound **40** ( $\text{CDCl}_3$ , 125 MHz)

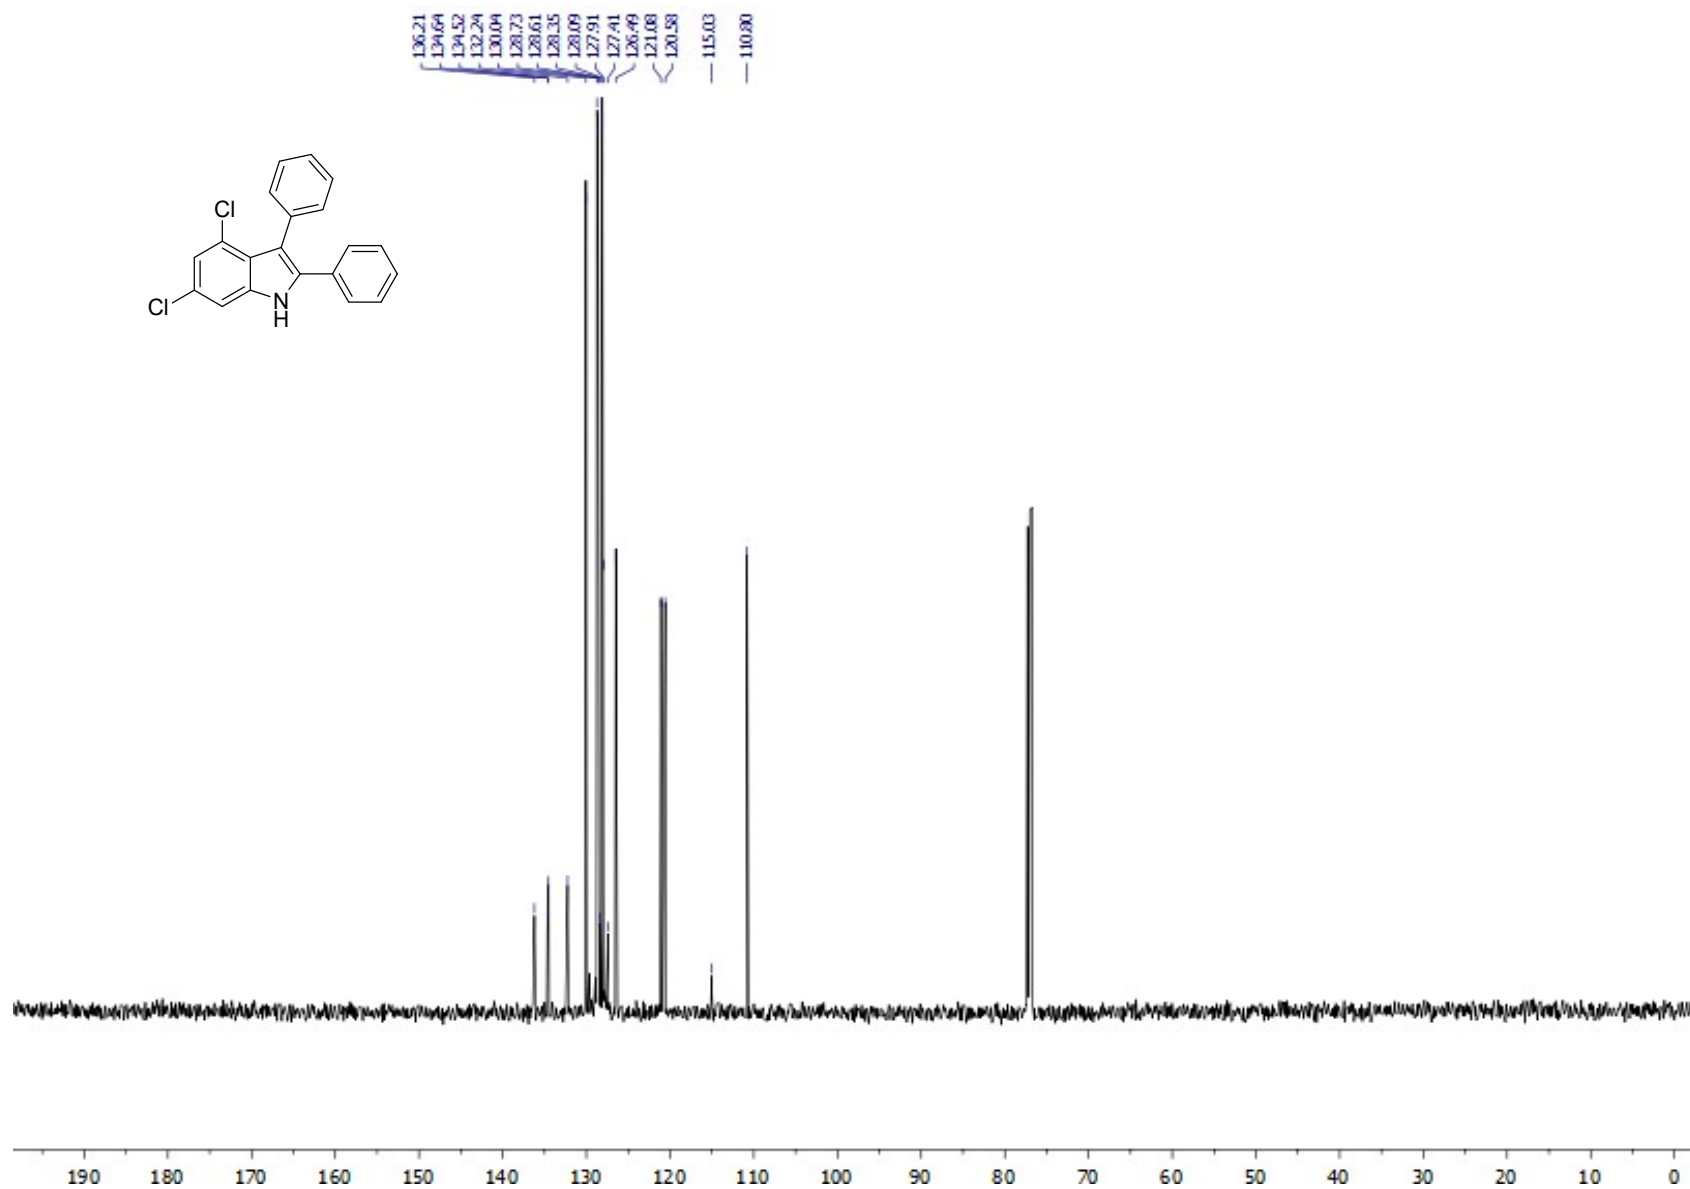

<sup>1</sup>H NMR of Compound **41** (CDCl<sub>3</sub>, 500 MHz)

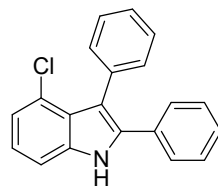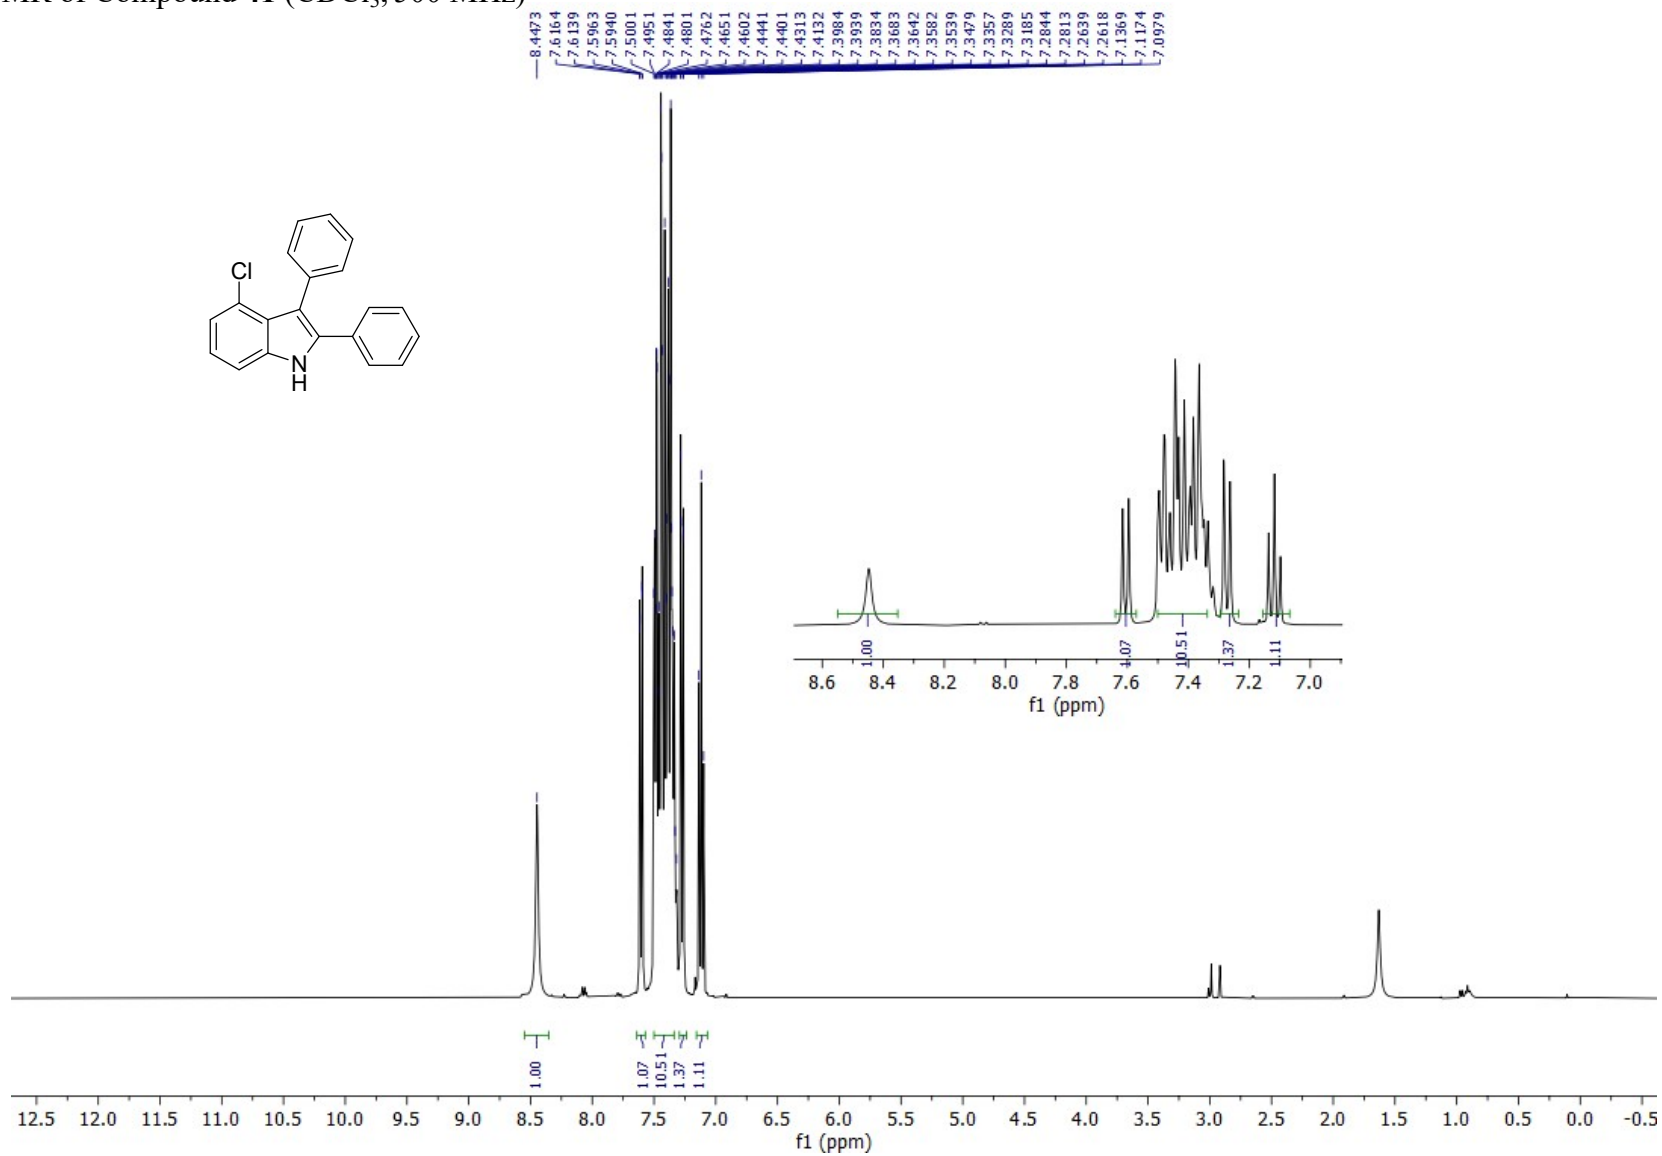

$^{13}\text{C}$  NMR of compound **41** ( $\text{CDCl}_3$ , 125 MHz)

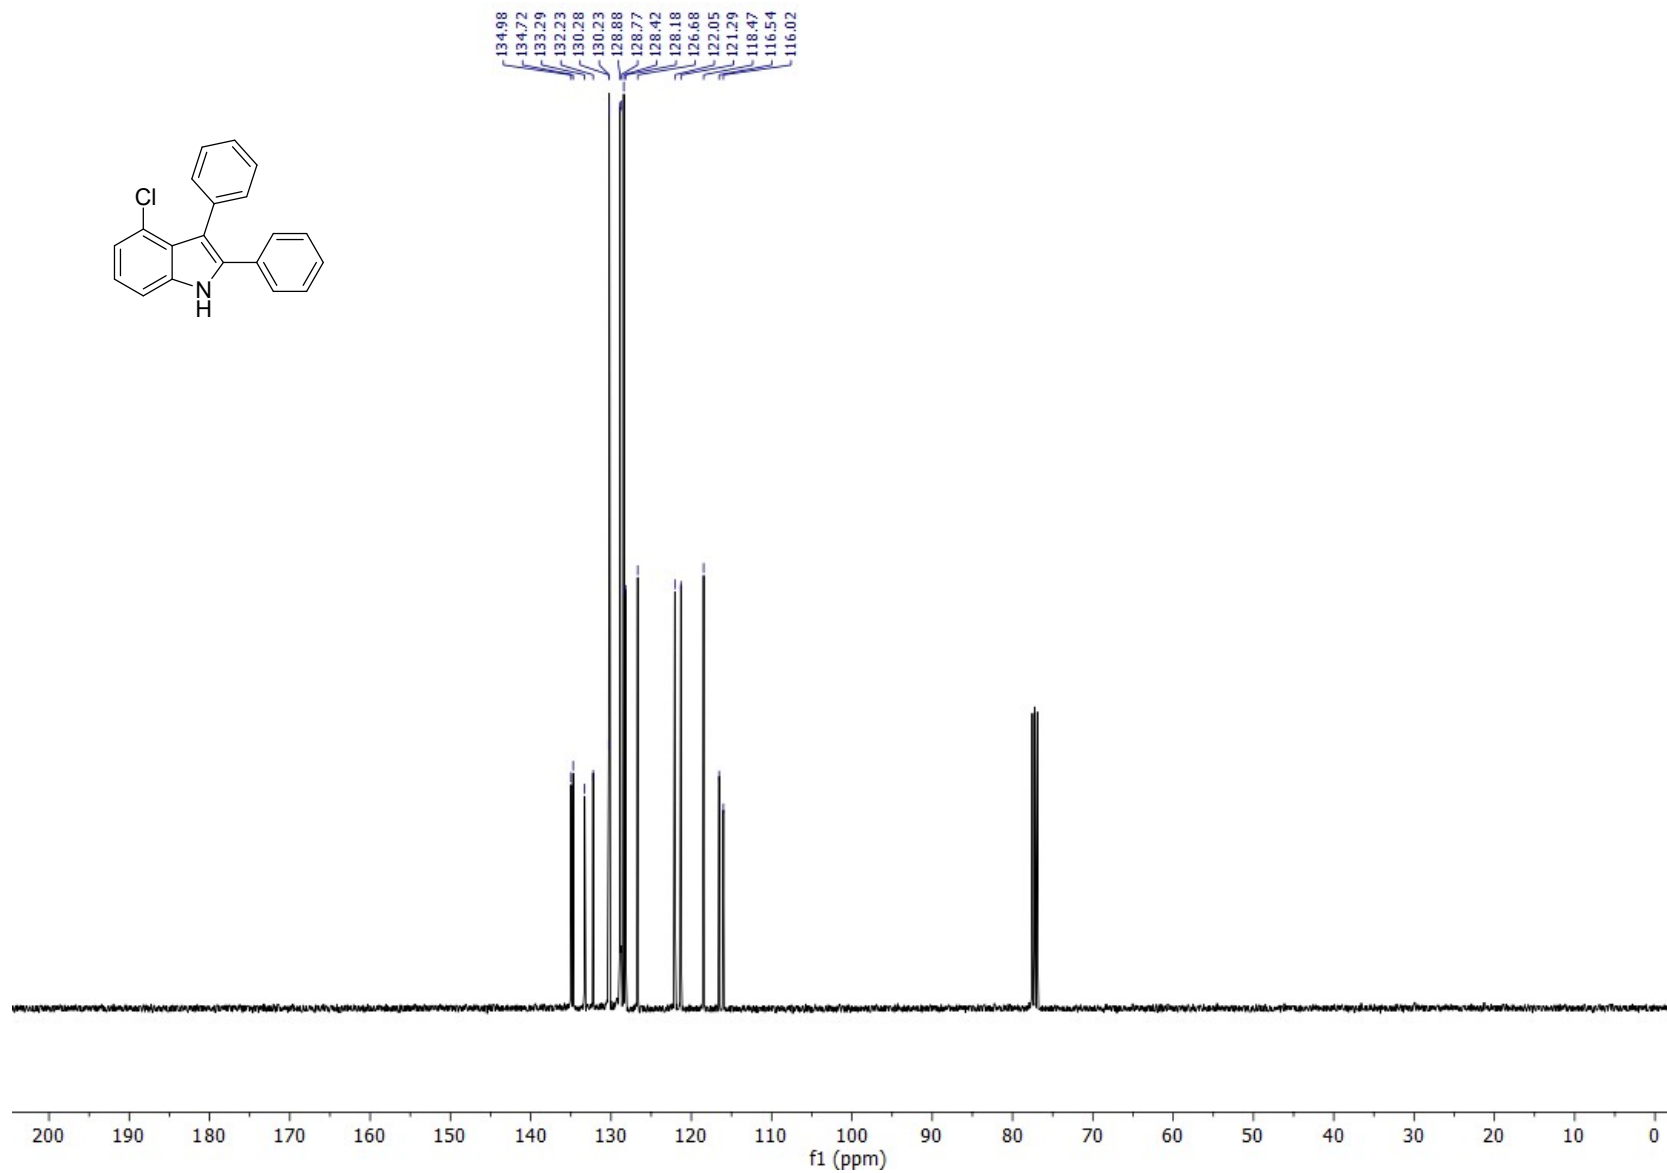

$^1\text{H}$  NMR of Compound **42** ( $\text{CDCl}_3$ , 500 MHz)

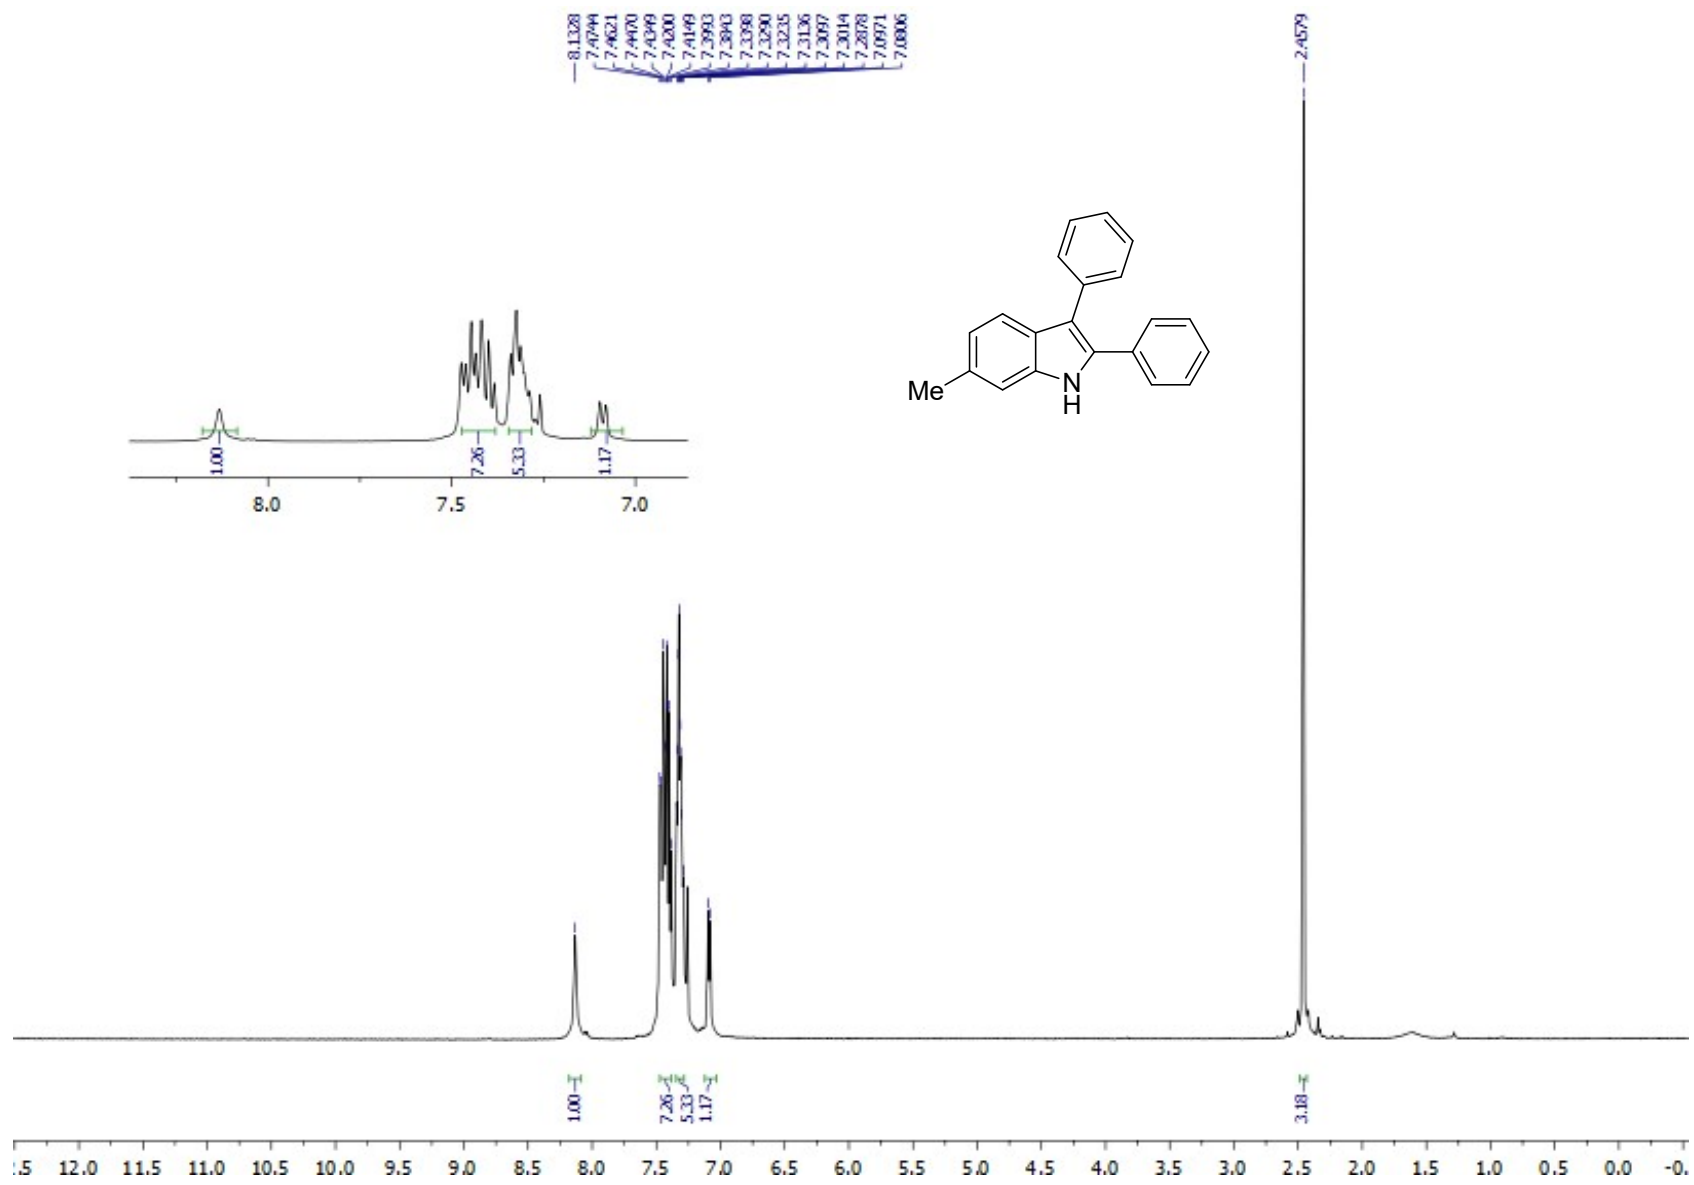

$^{13}\text{C}$  NMR of compound **42** ( $\text{CDCl}_3$ , 125 MHz)

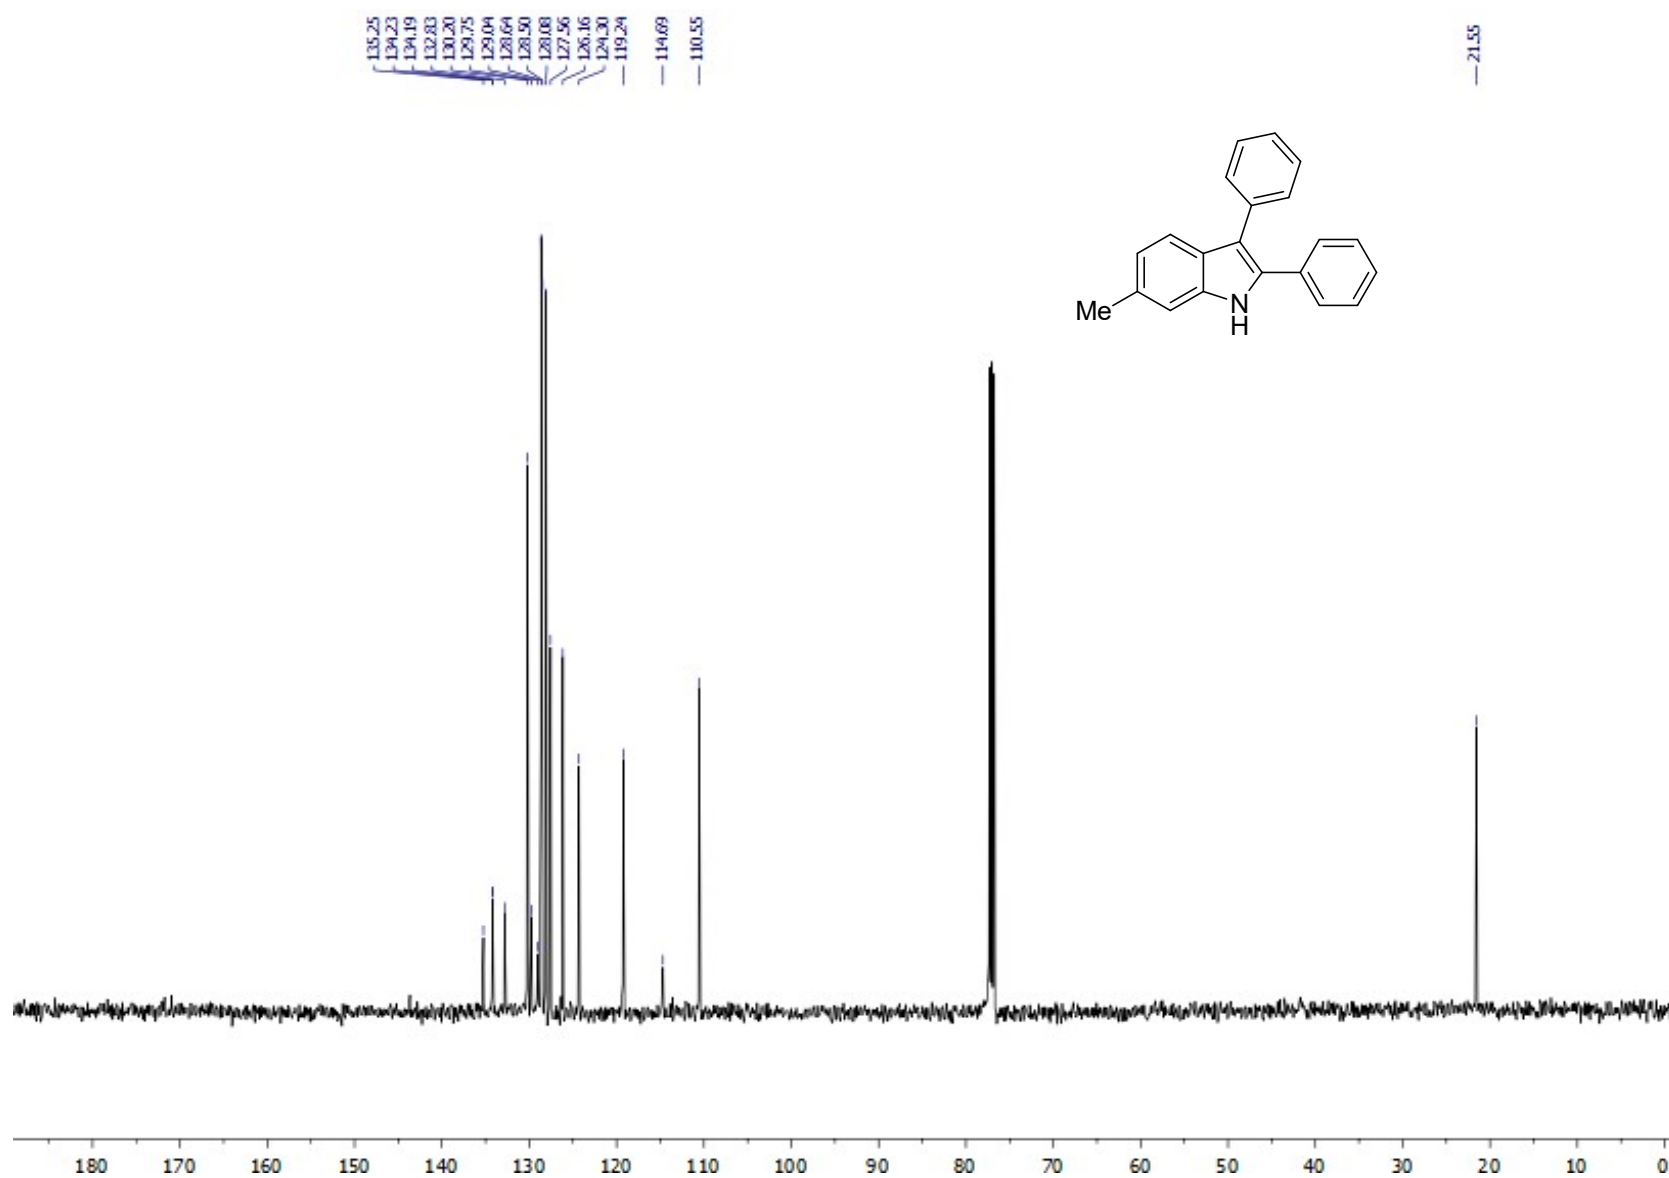

$^1\text{H}$  NMR of Compound **43** ( $\text{CDCl}_3$ , 500 MHz)

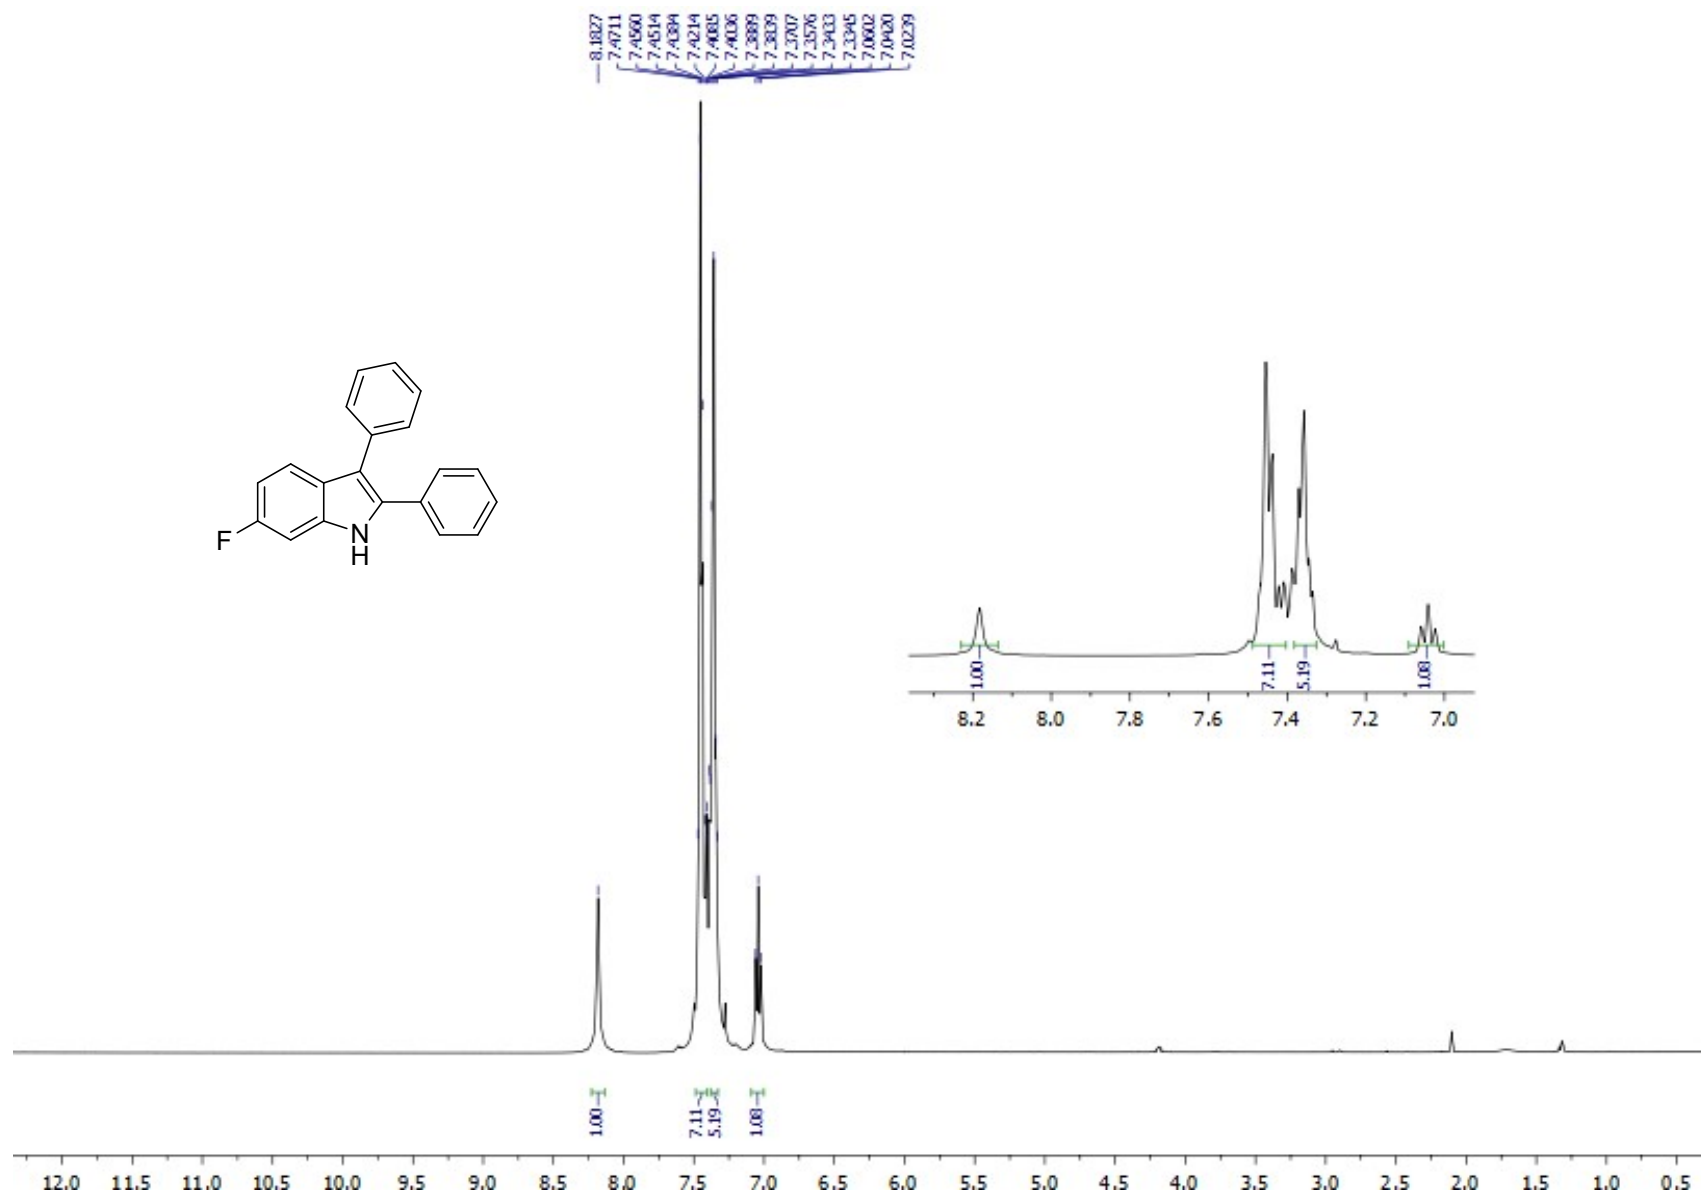



$^{13}\text{C}$  NMR of compound **43** ( $\text{CDCl}_3$ , 125 MHz)

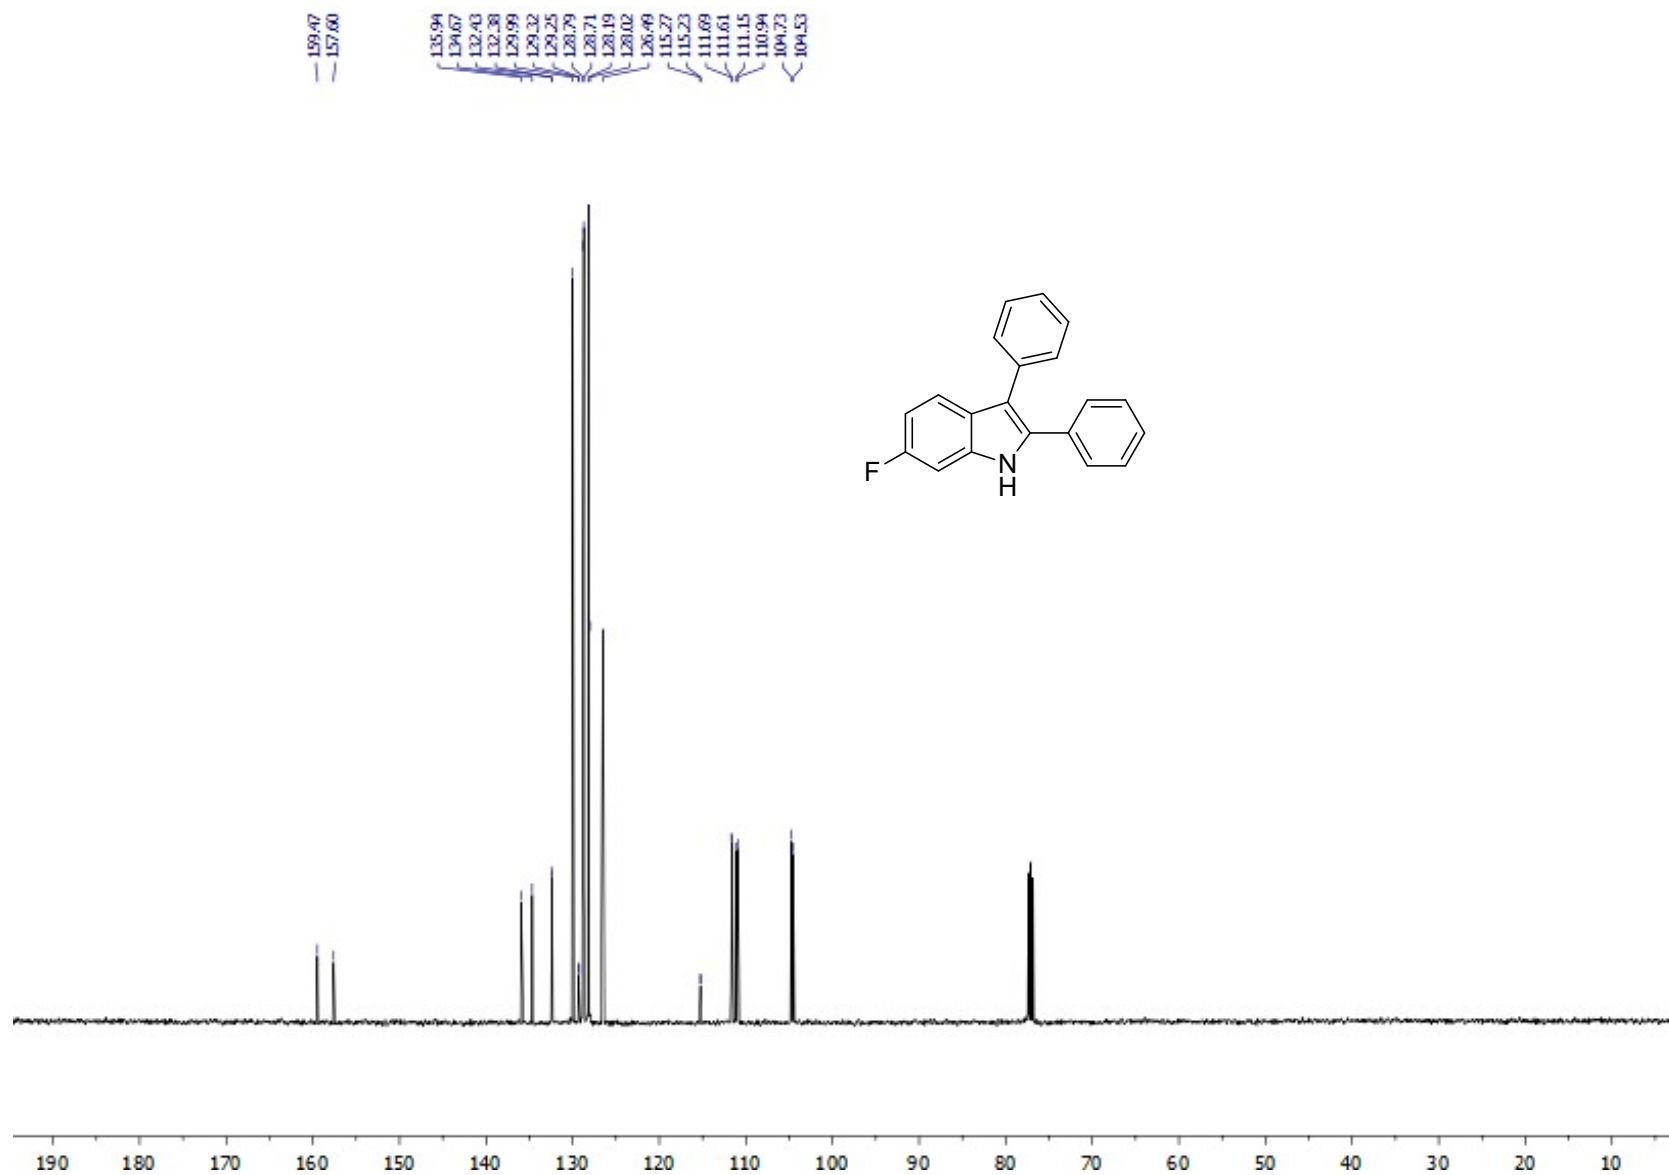

<sup>1</sup>H NMR of Compound **44** (CDCl<sub>3</sub>, 500 MHz)

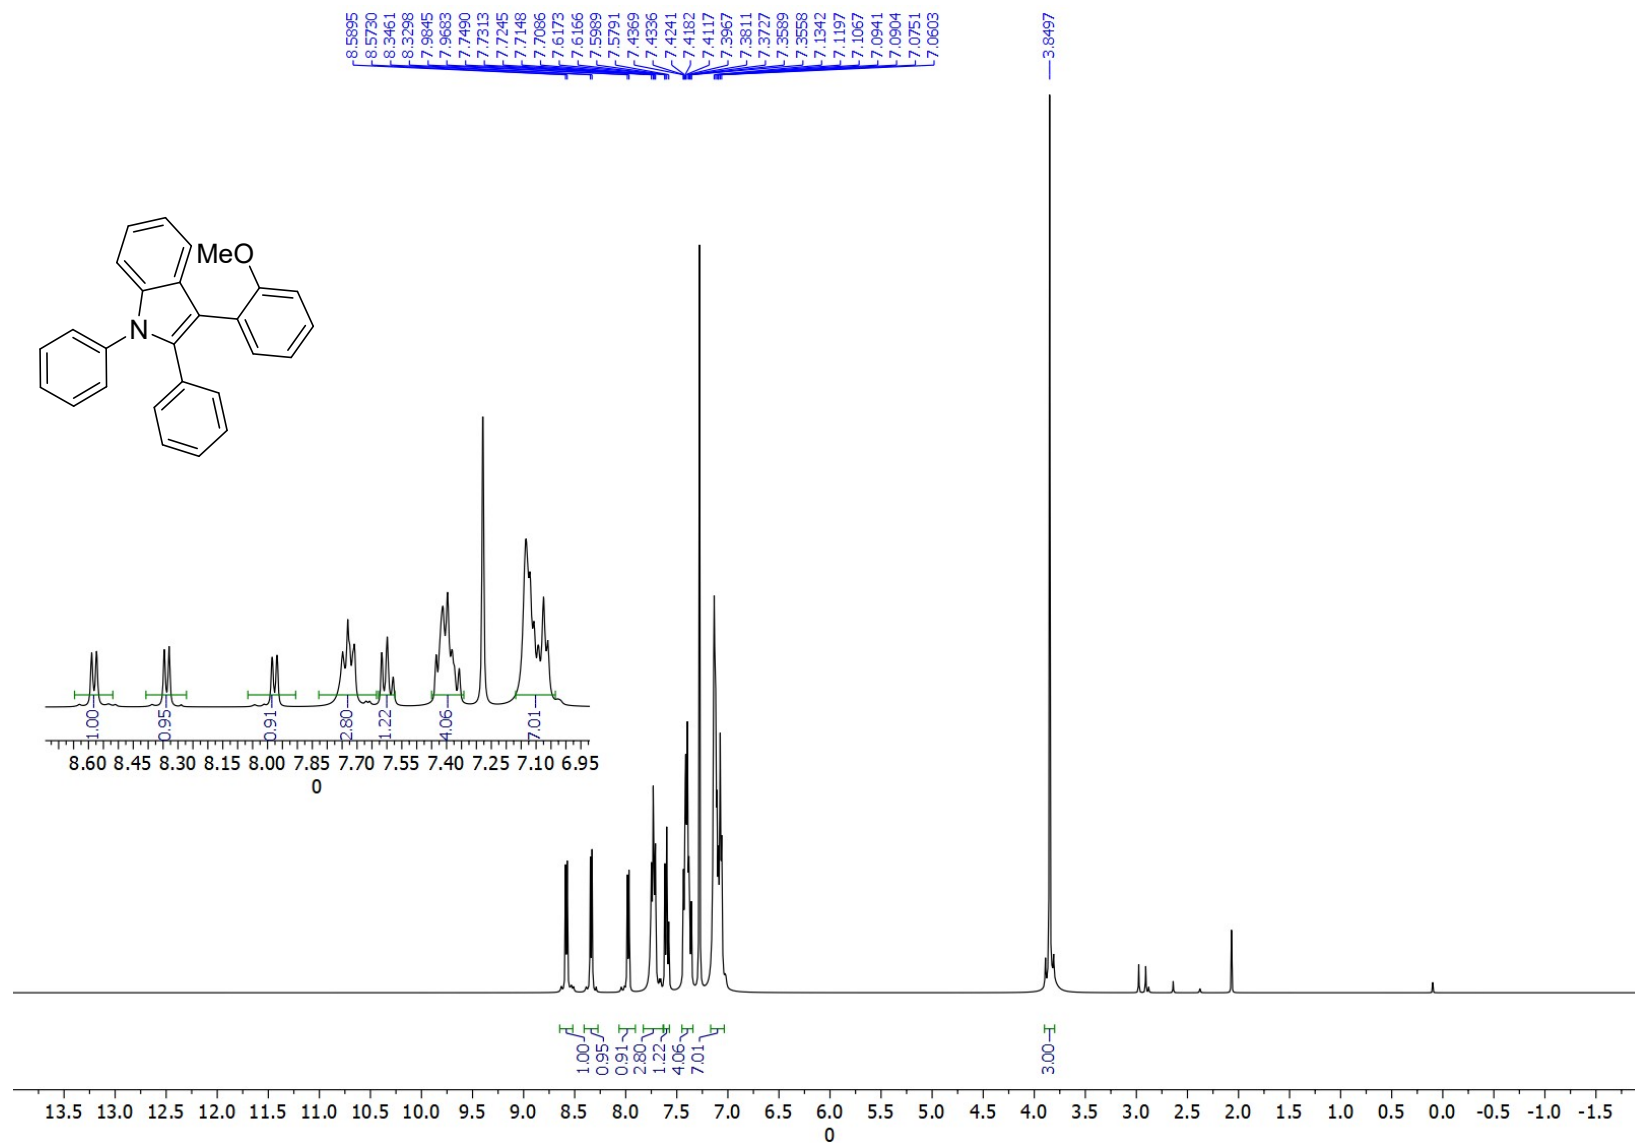

$^{13}\text{C}$  NMR of compound **44** ( $\text{CDCl}_3$ , 125 MHz)

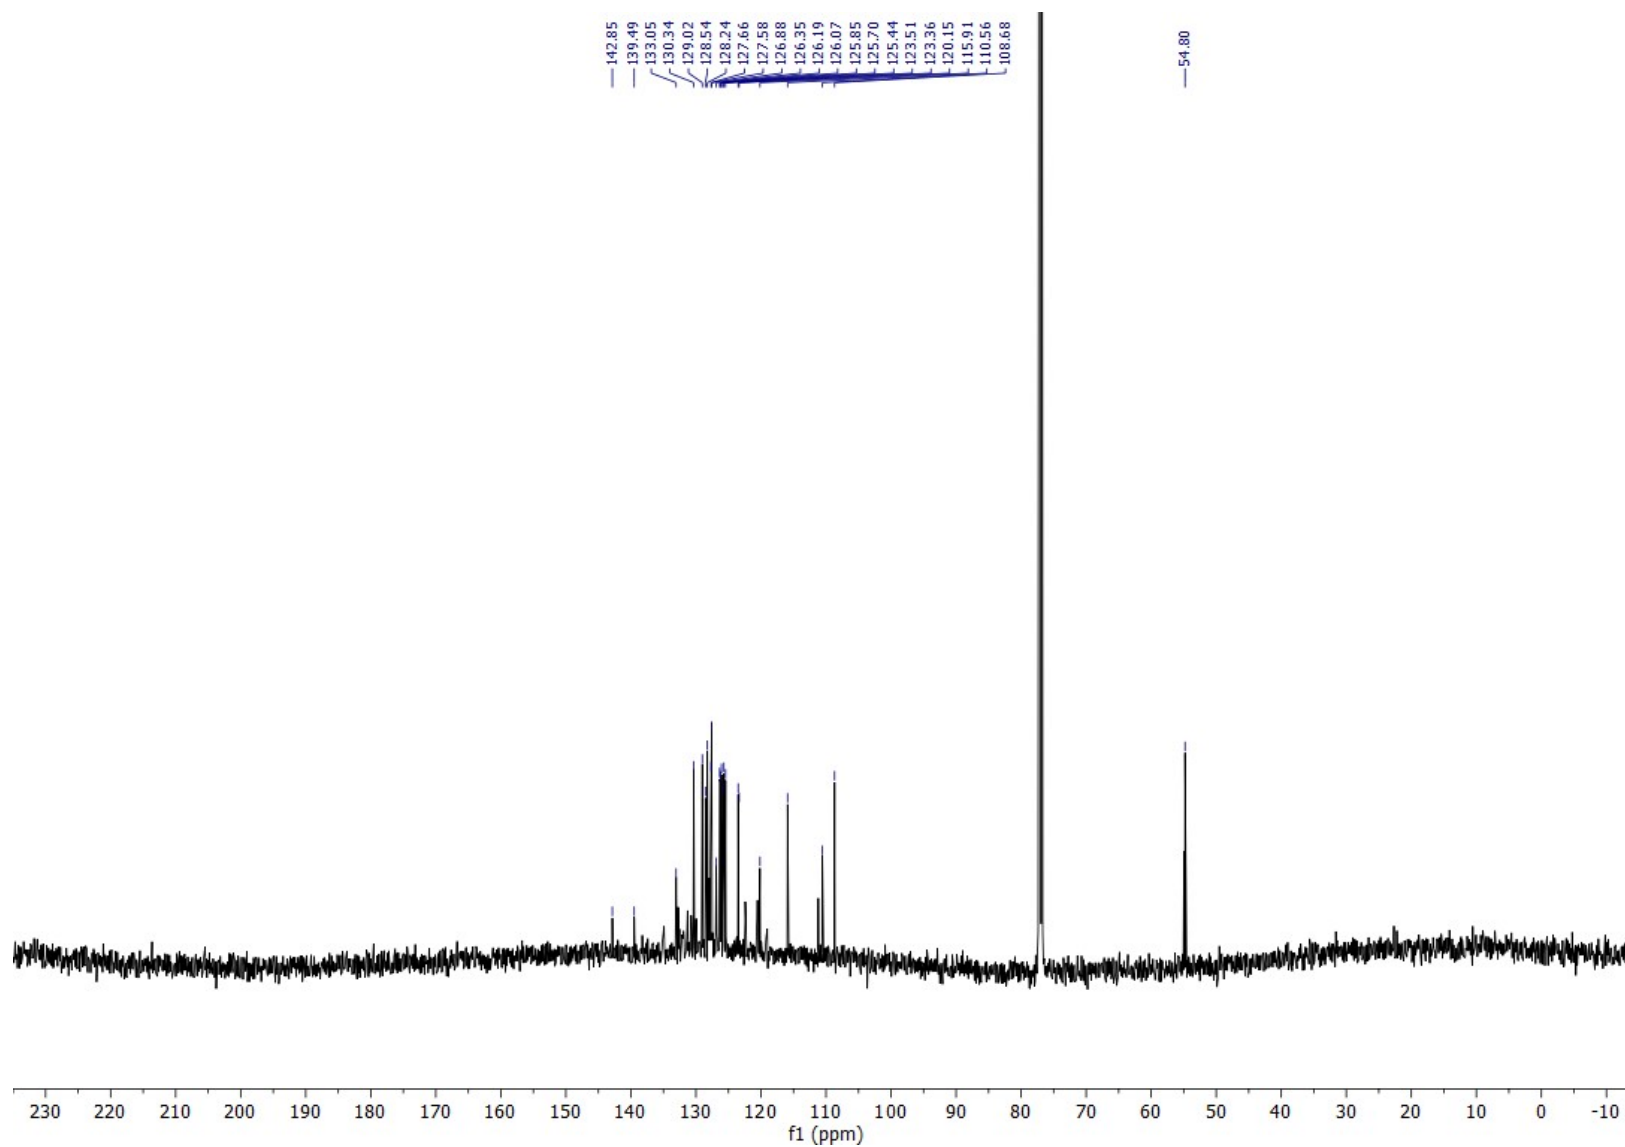

$^1\text{H}$  NMR of Compound **45** ( $\text{CDCl}_3$ , 500 MHz)

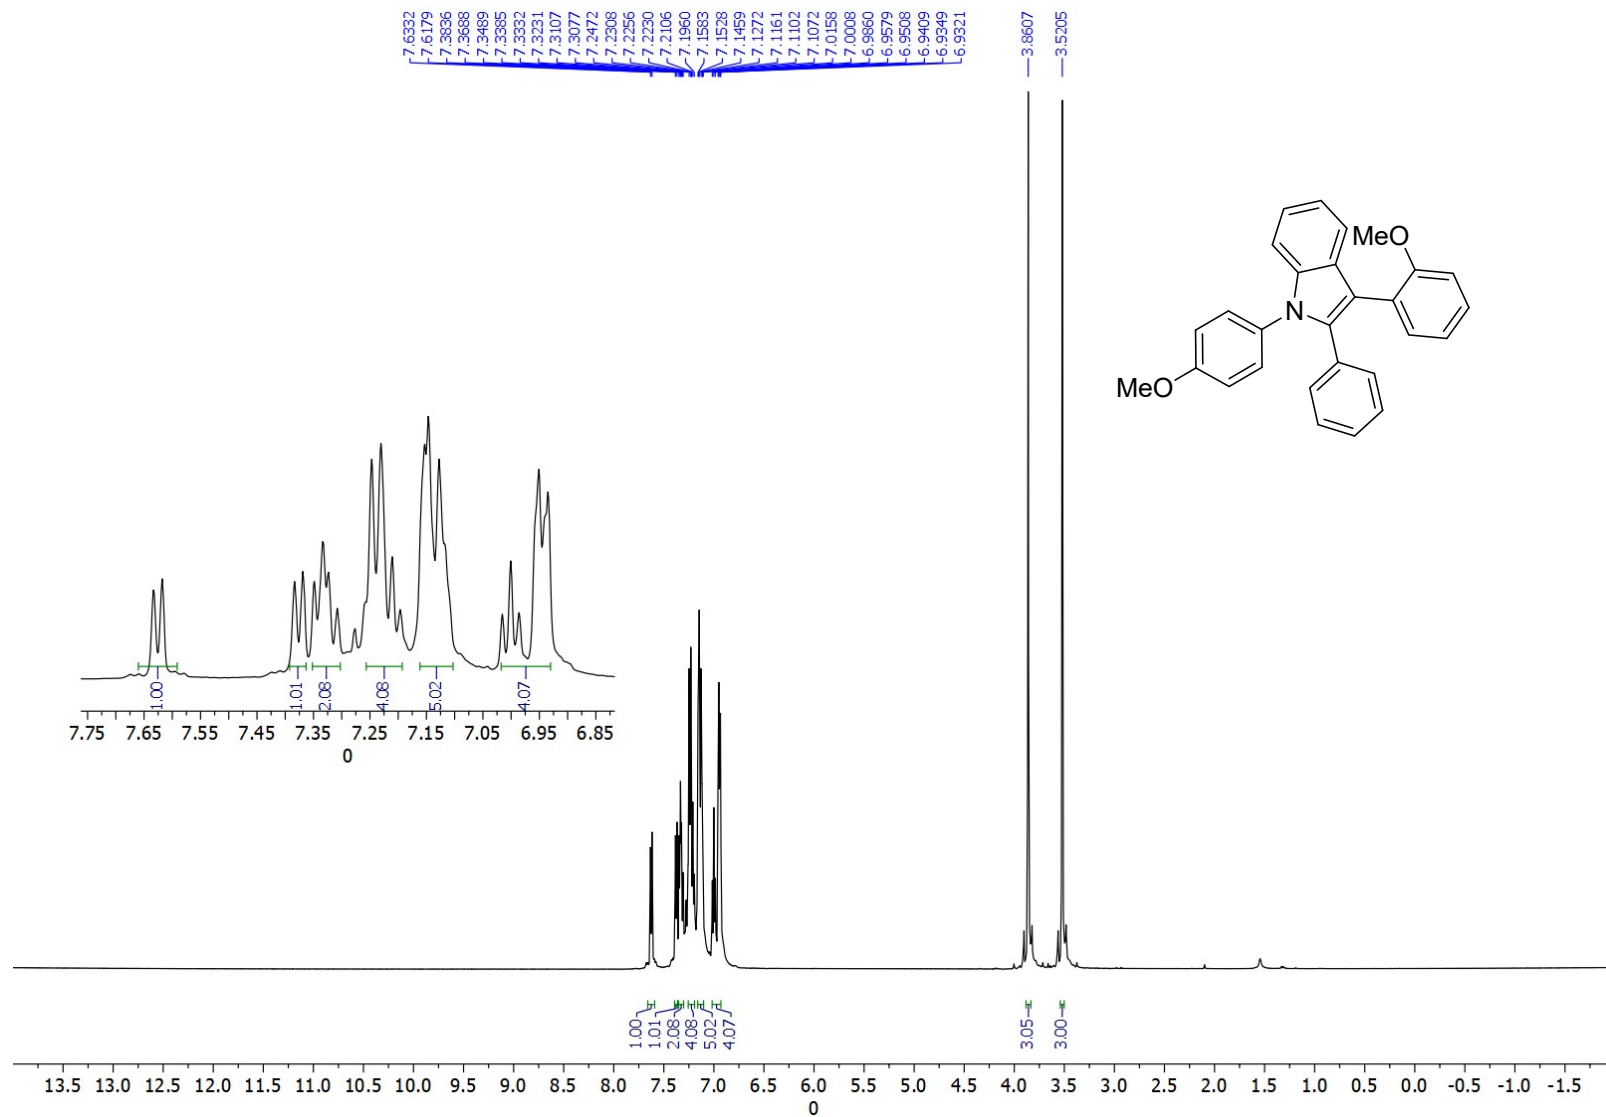

<sup>13</sup>C NMR of compound **45** (CDCl<sub>3</sub>, 125 MHz)

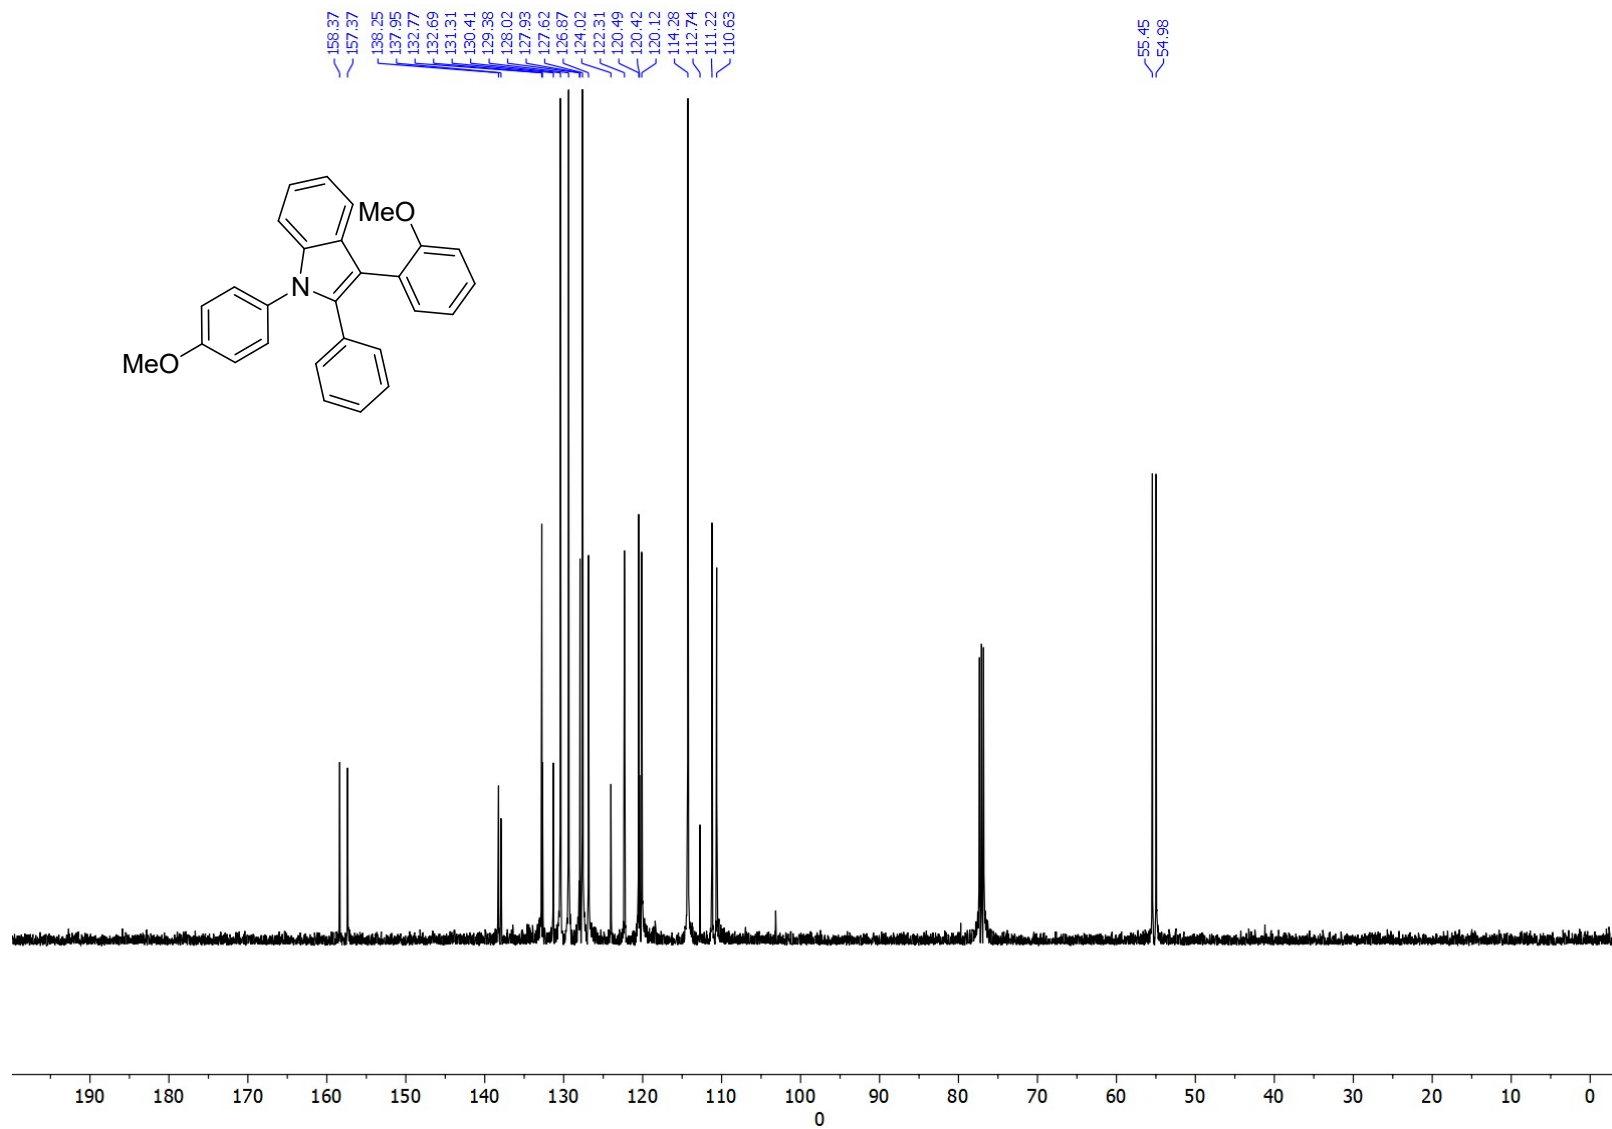

<sup>1</sup>H NMR of Compound **46** (CDCl<sub>3</sub>, 500 MHz)

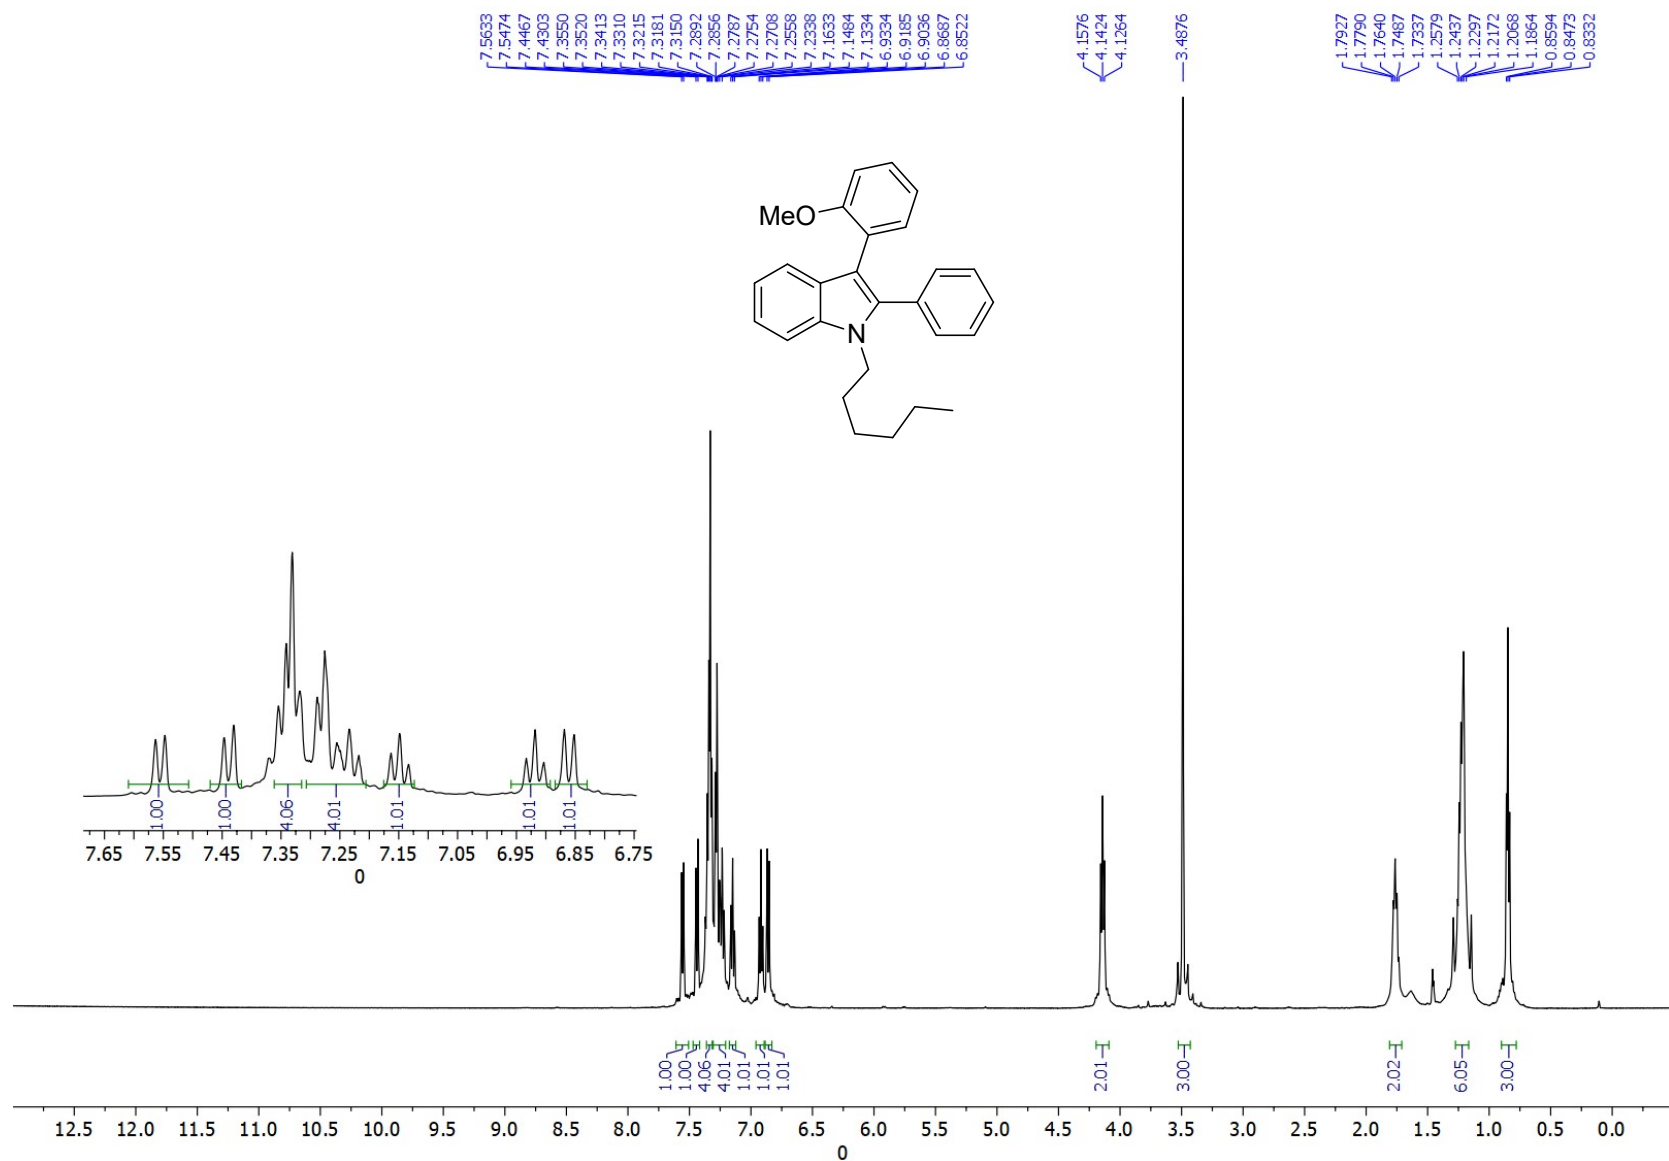

$^{13}\text{C}$  NMR of compound **46** ( $\text{CDCl}_3$ , 125 MHz)

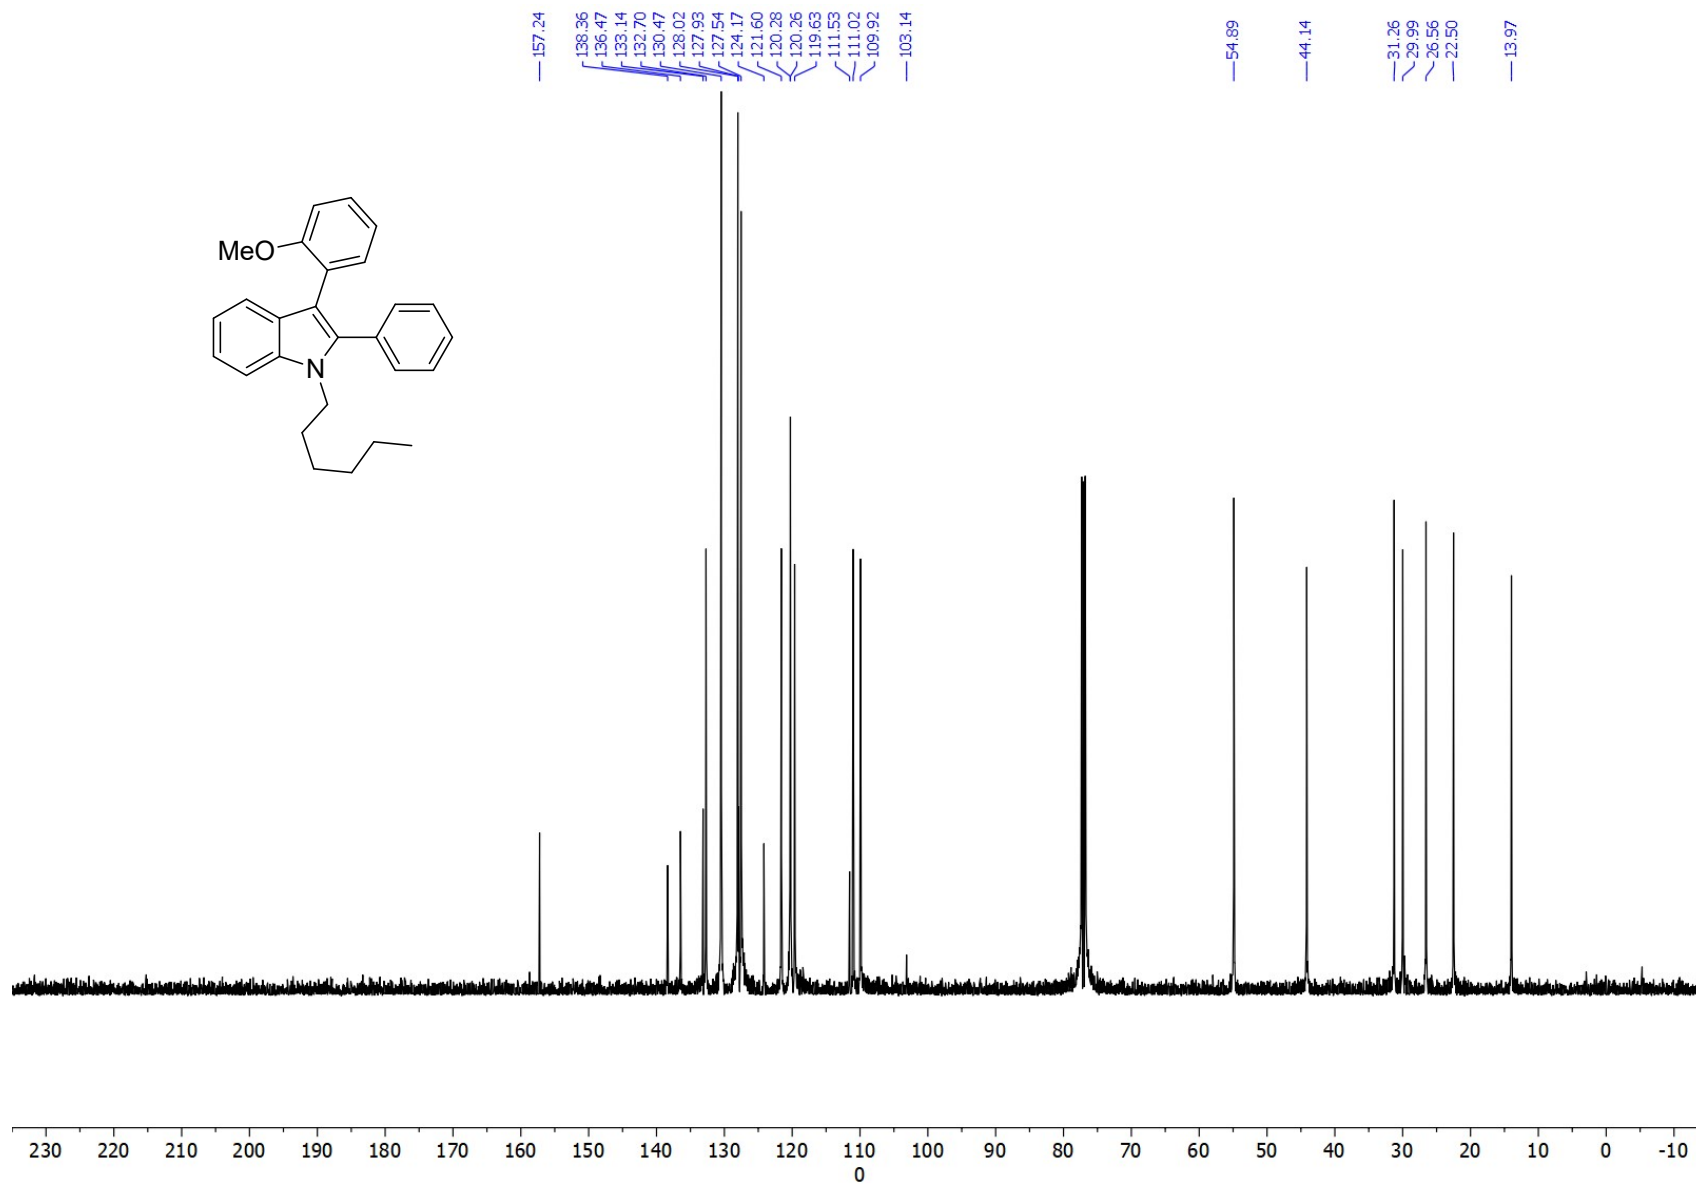

<sup>1</sup>H NMR of Compound **47** (CDCl<sub>3</sub>, 500 MHz)

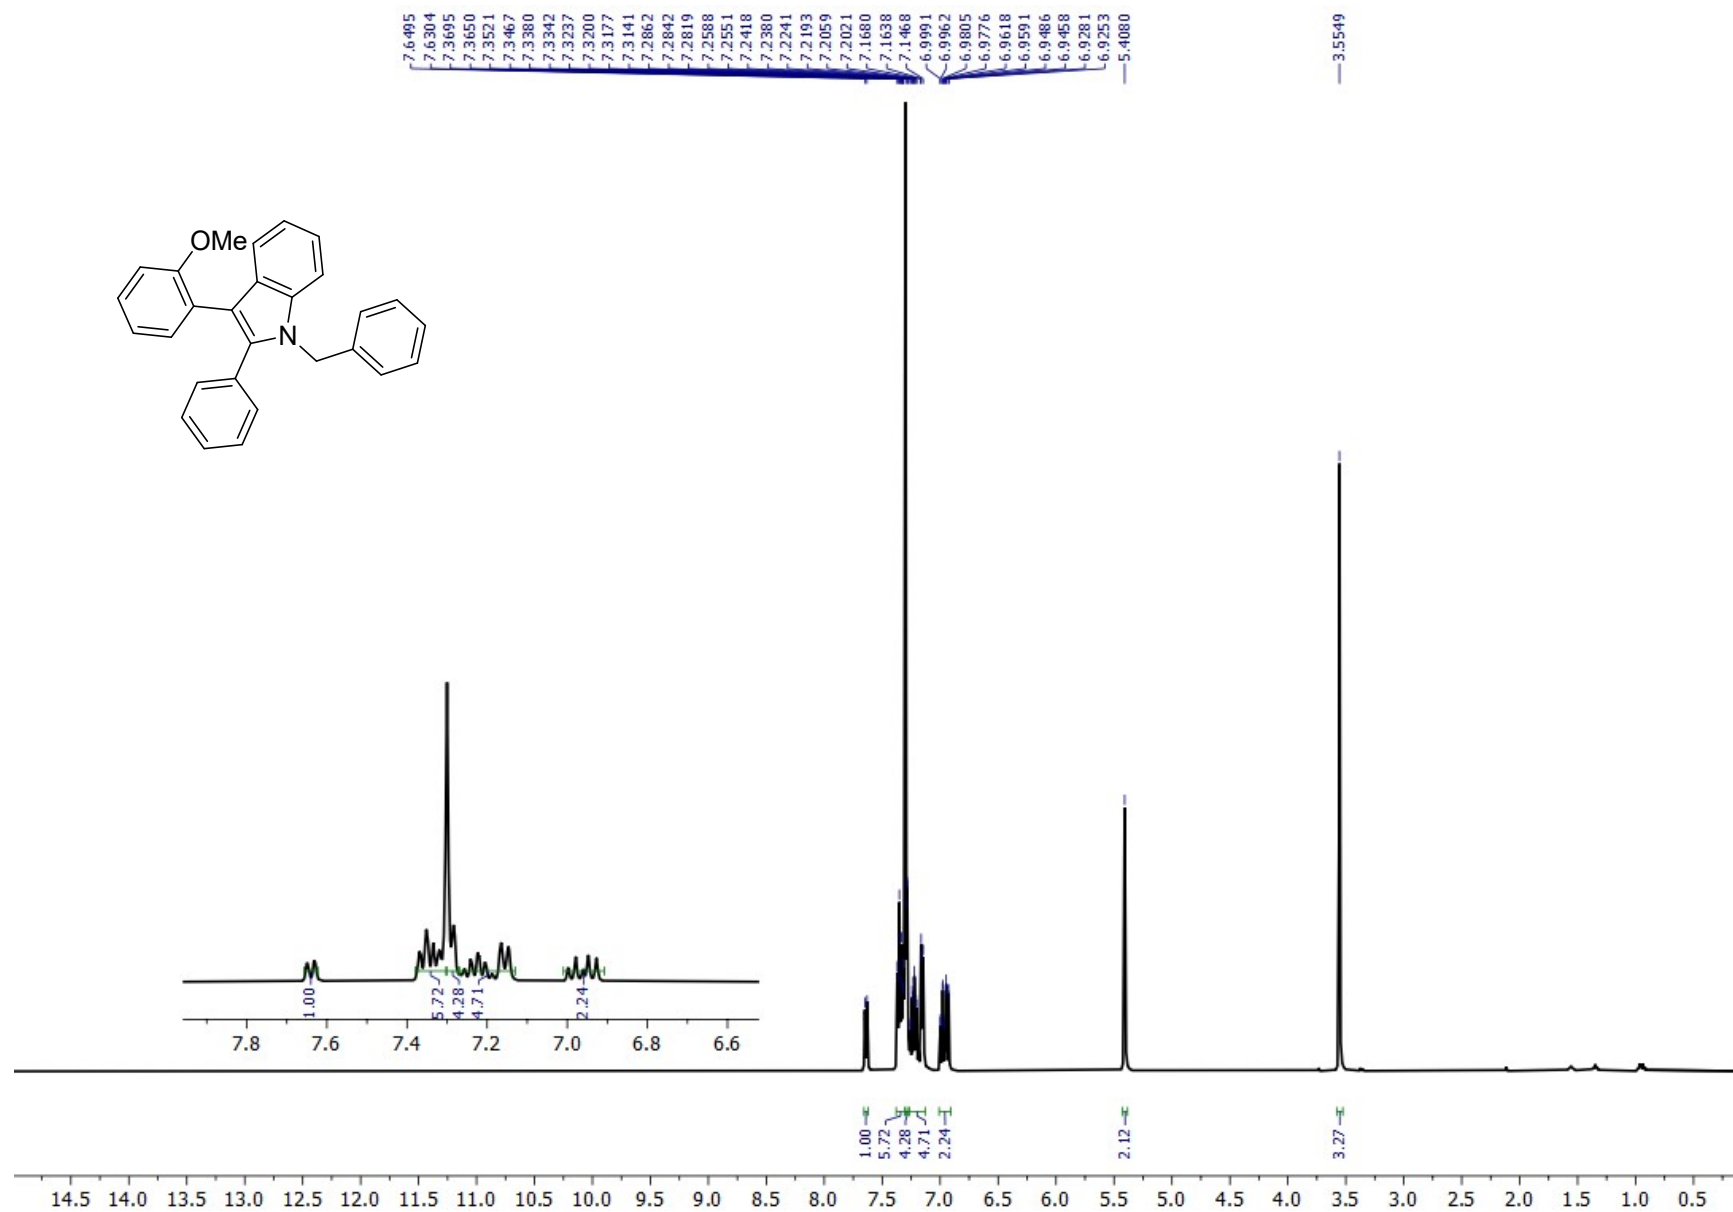



$^{13}\text{C}$  NMR of compound **47** ( $\text{CDCl}_3$ , 125 MHz)

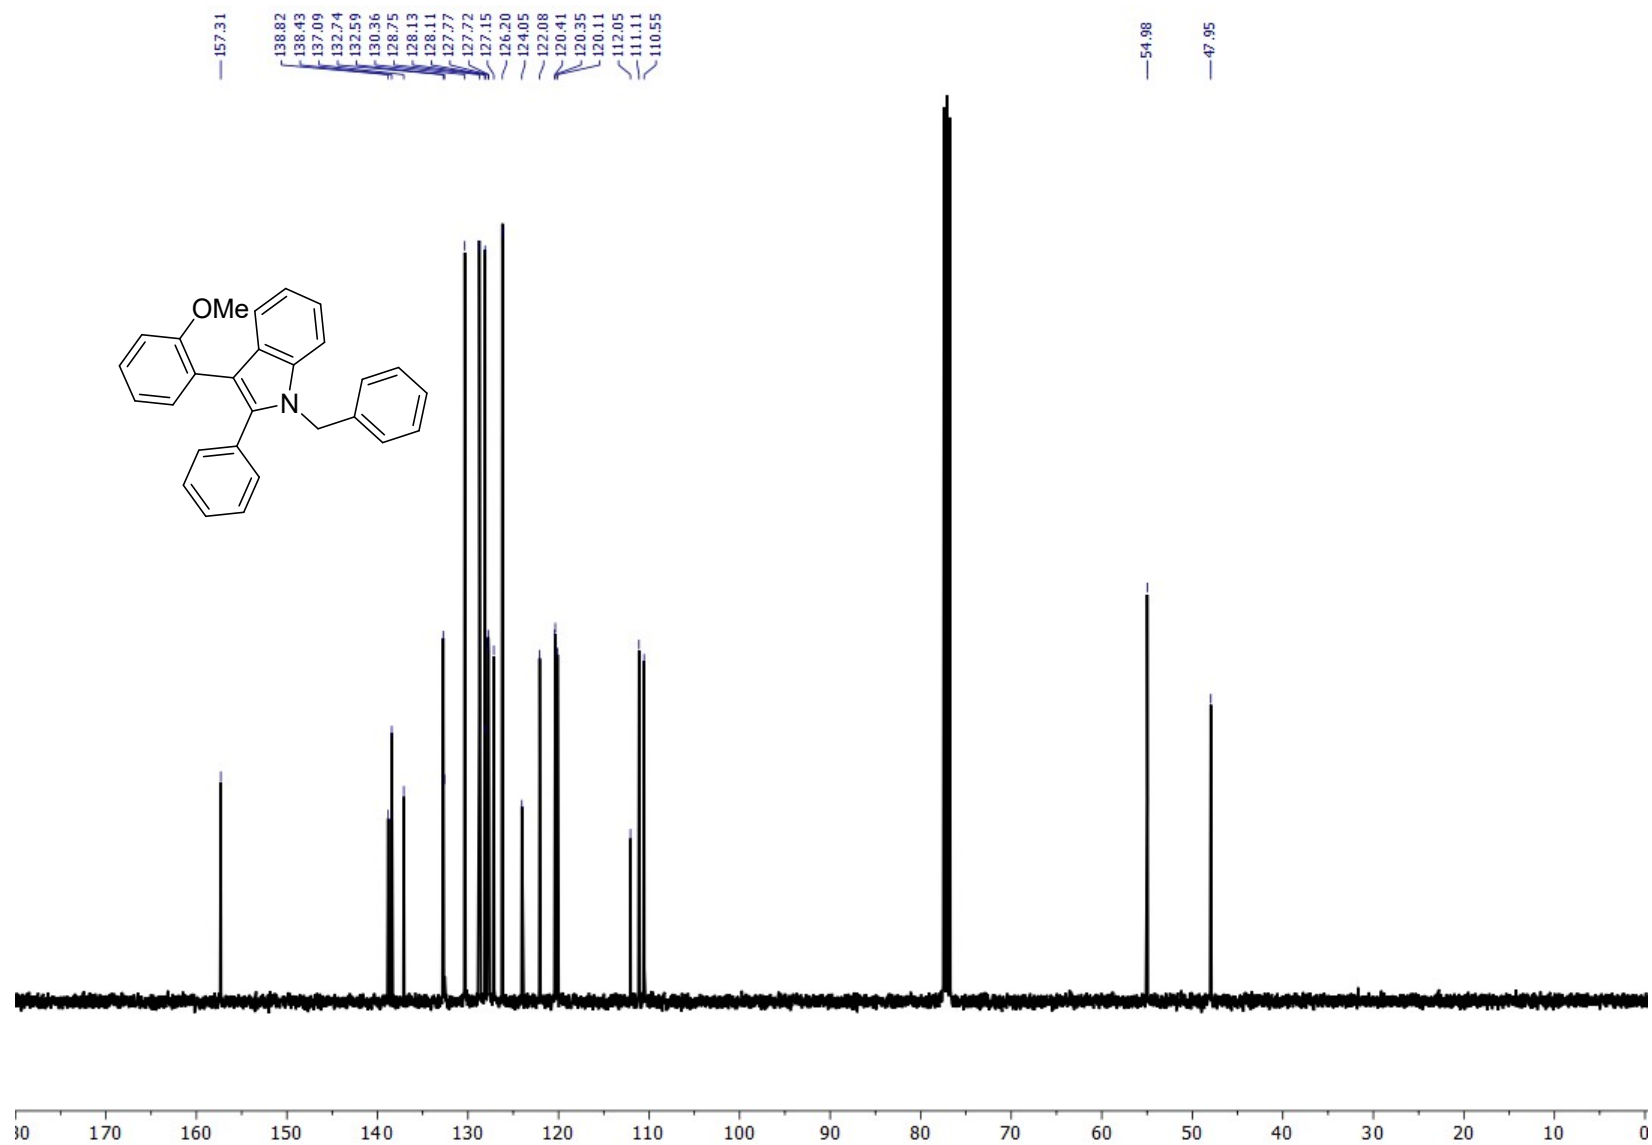

$^1\text{H}$  NMR of Compound **48** ( $\text{CDCl}_3$ , 500 MHz)

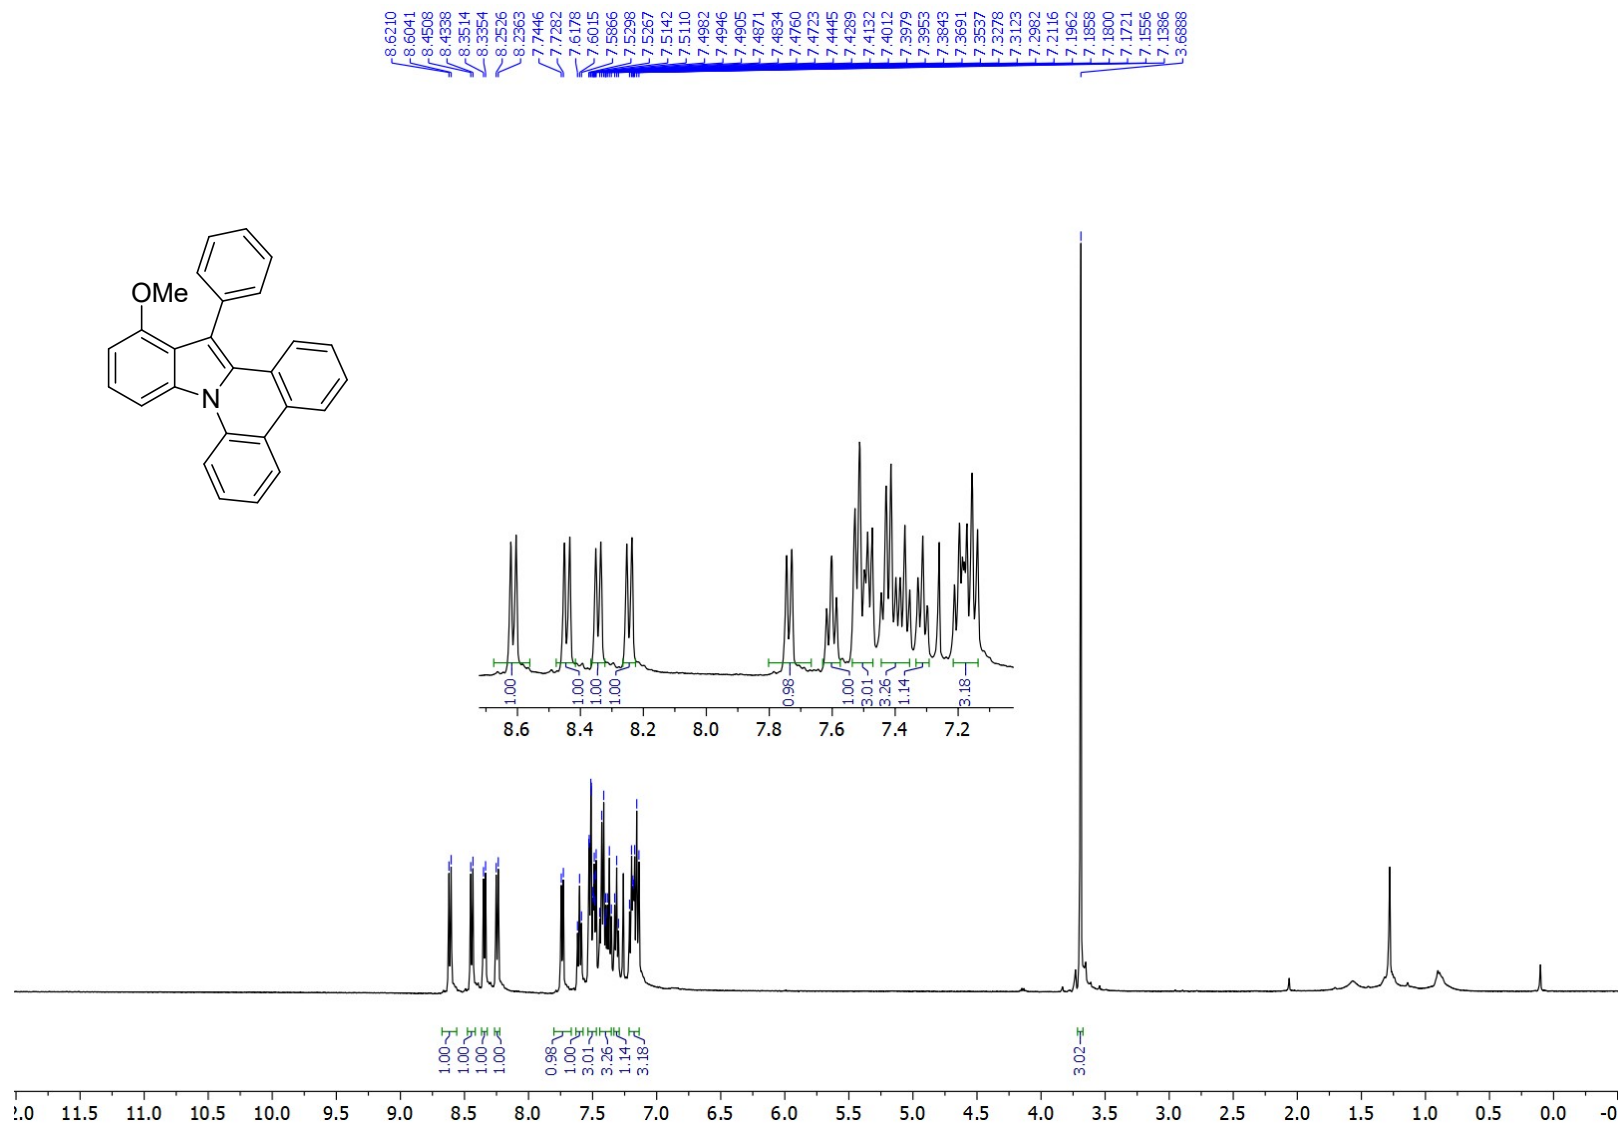

$^{13}\text{C}$  NMR of compound **48** ( $\text{CDCl}_3$ , 125 MHz)

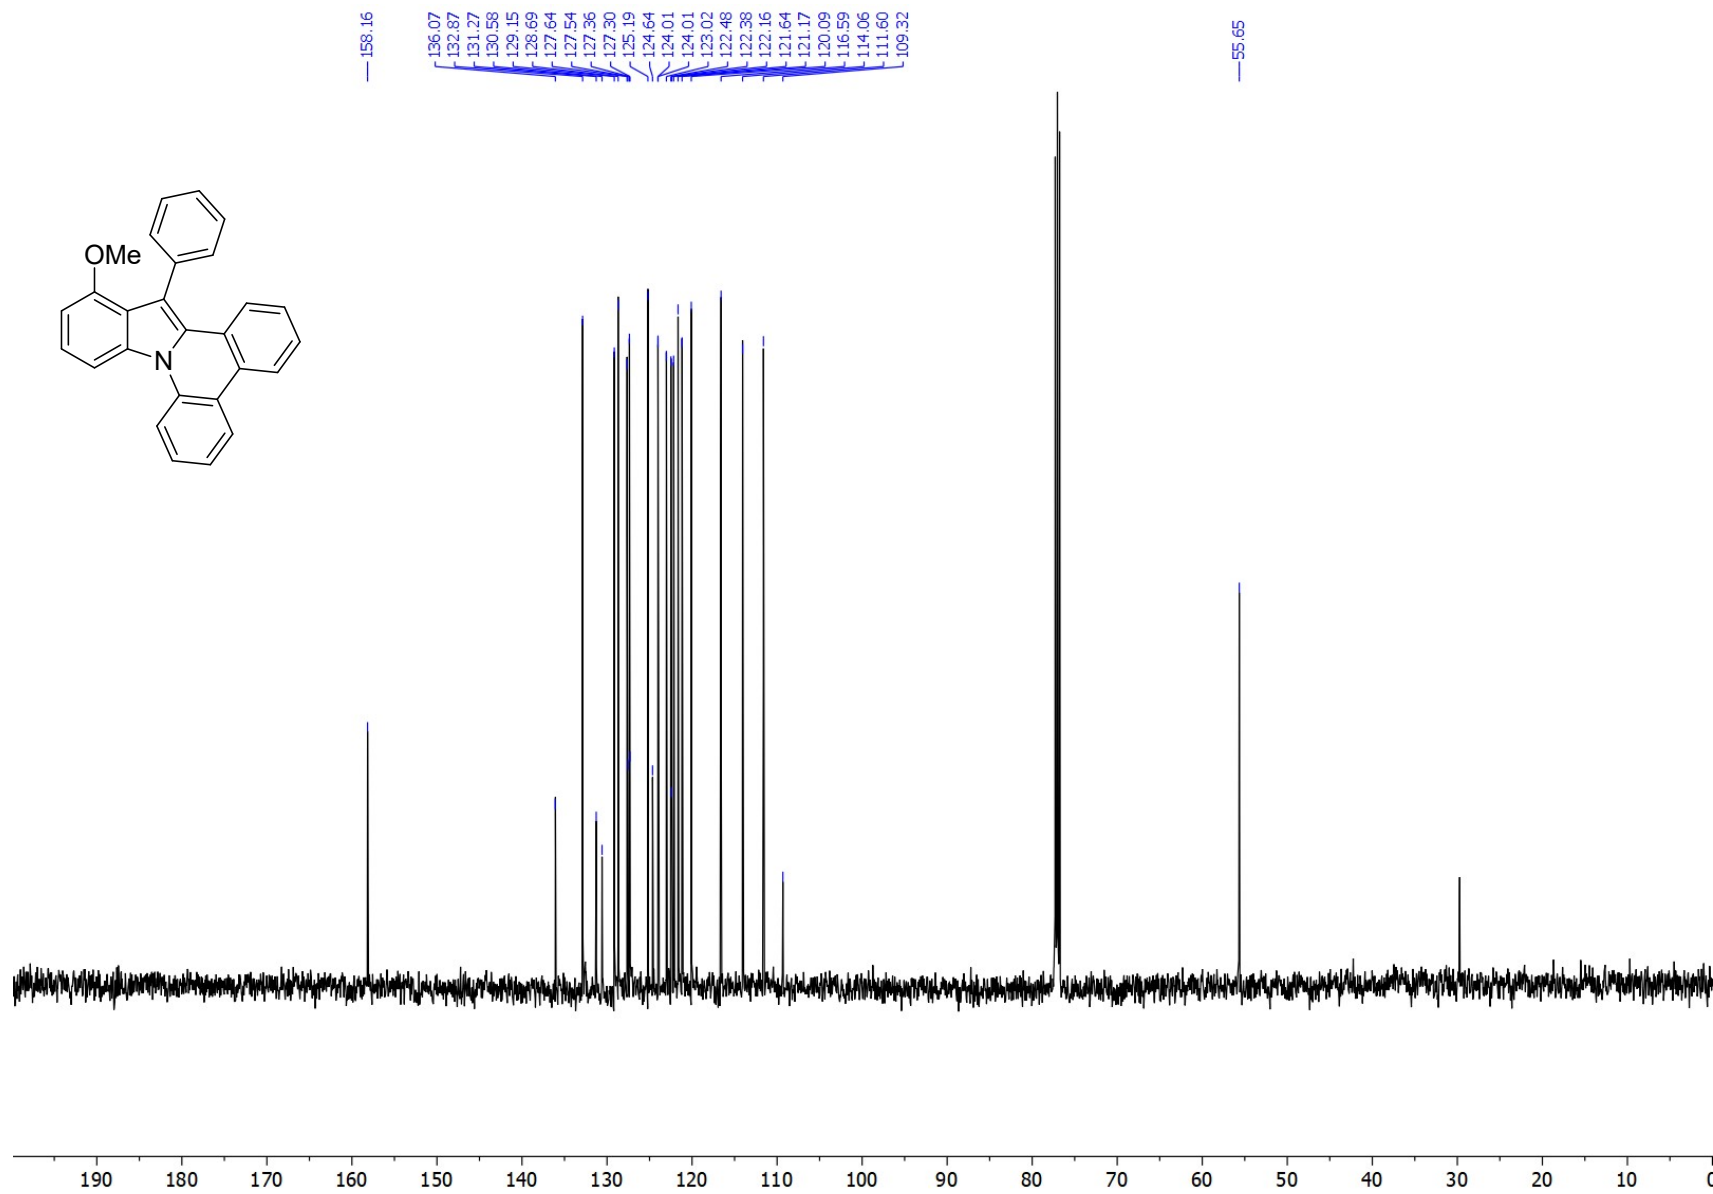

$^1\text{H}$  NMR of Compound **49** ( $\text{CDCl}_3$ , 500 MHz)

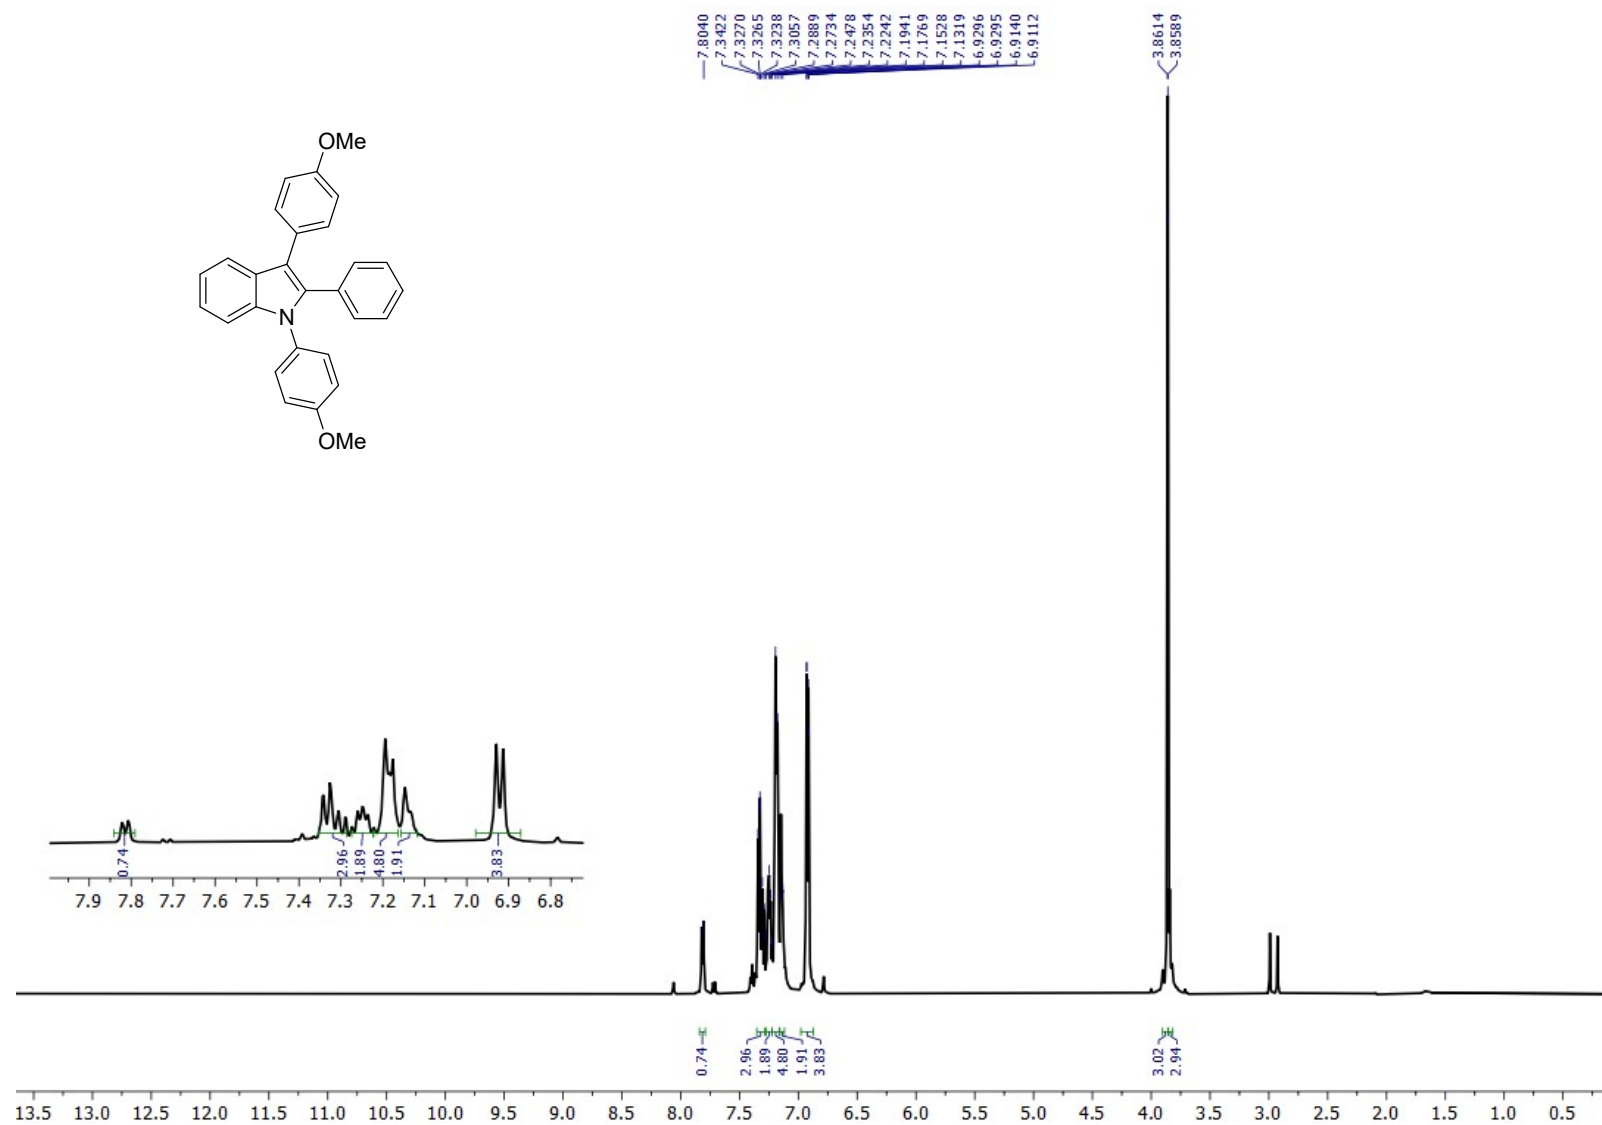

$^{13}\text{C}$  NMR of compound **49** ( $\text{CDCl}_3$ , 125 MHz)

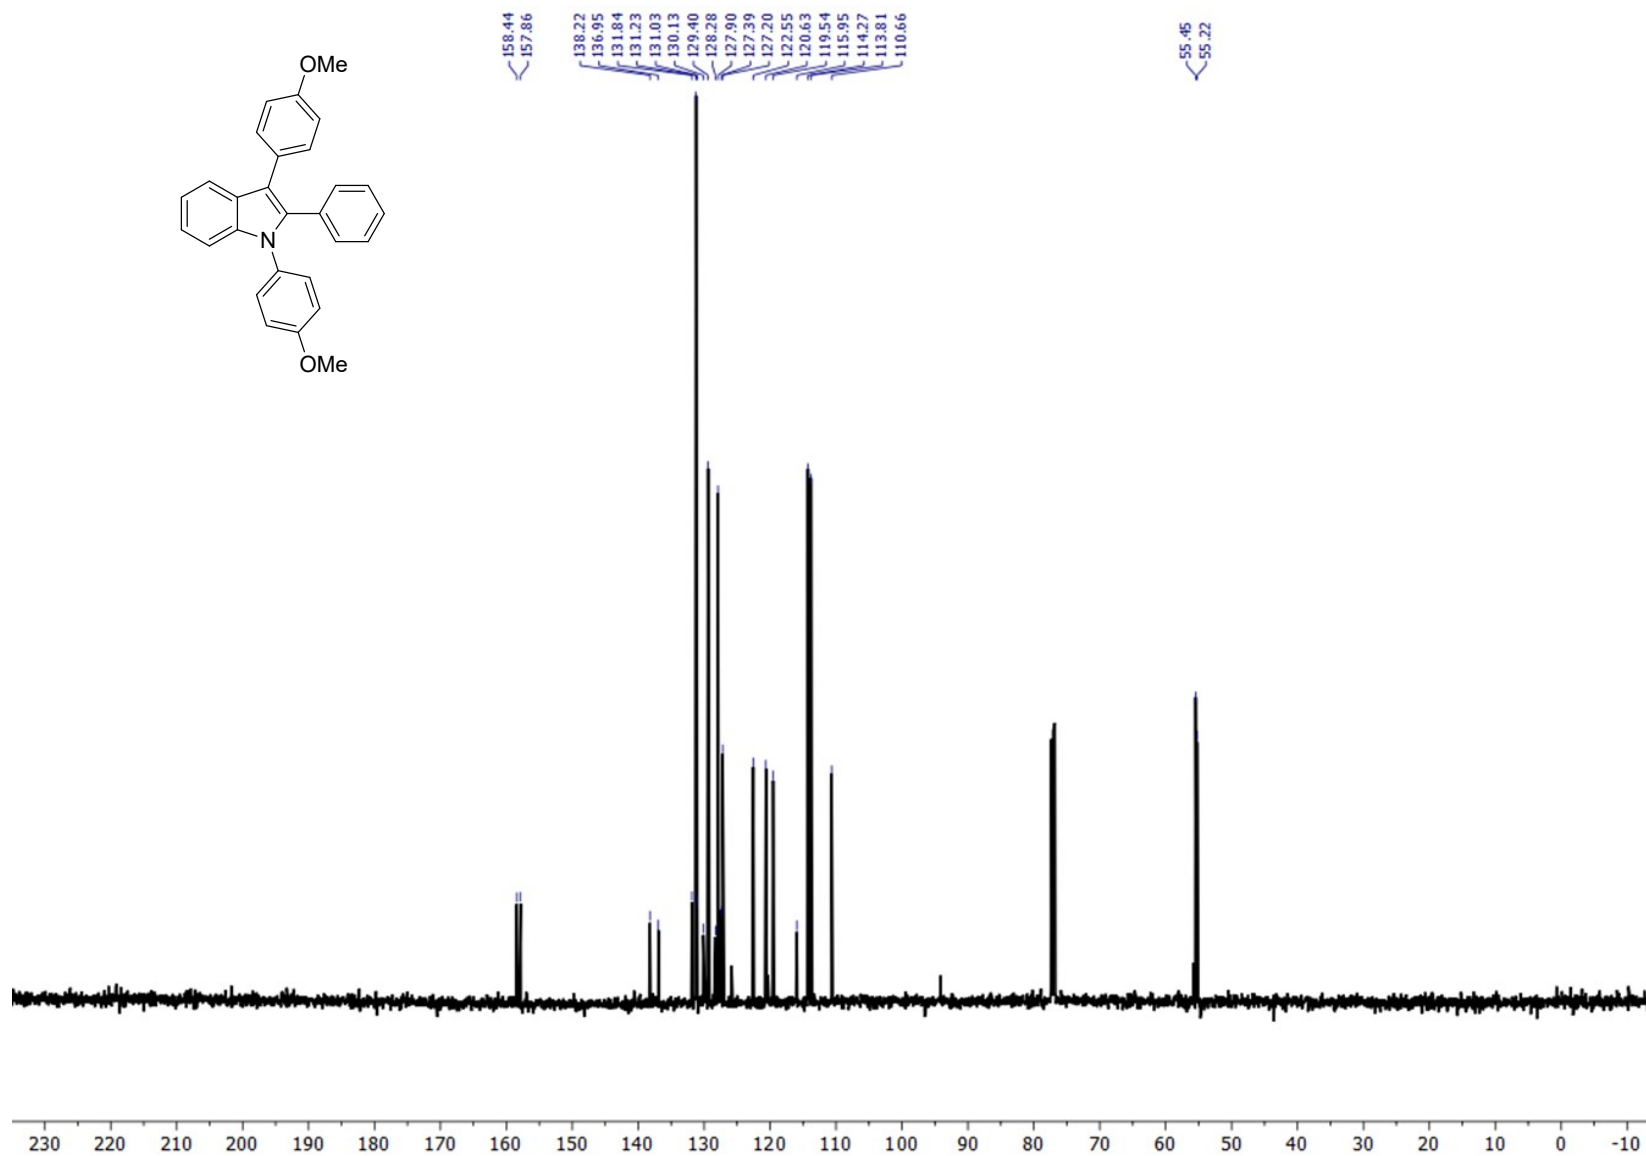

$^1\text{H}$  NMR of Compound **50** ( $\text{CDCl}_3$ , 500 MHz)

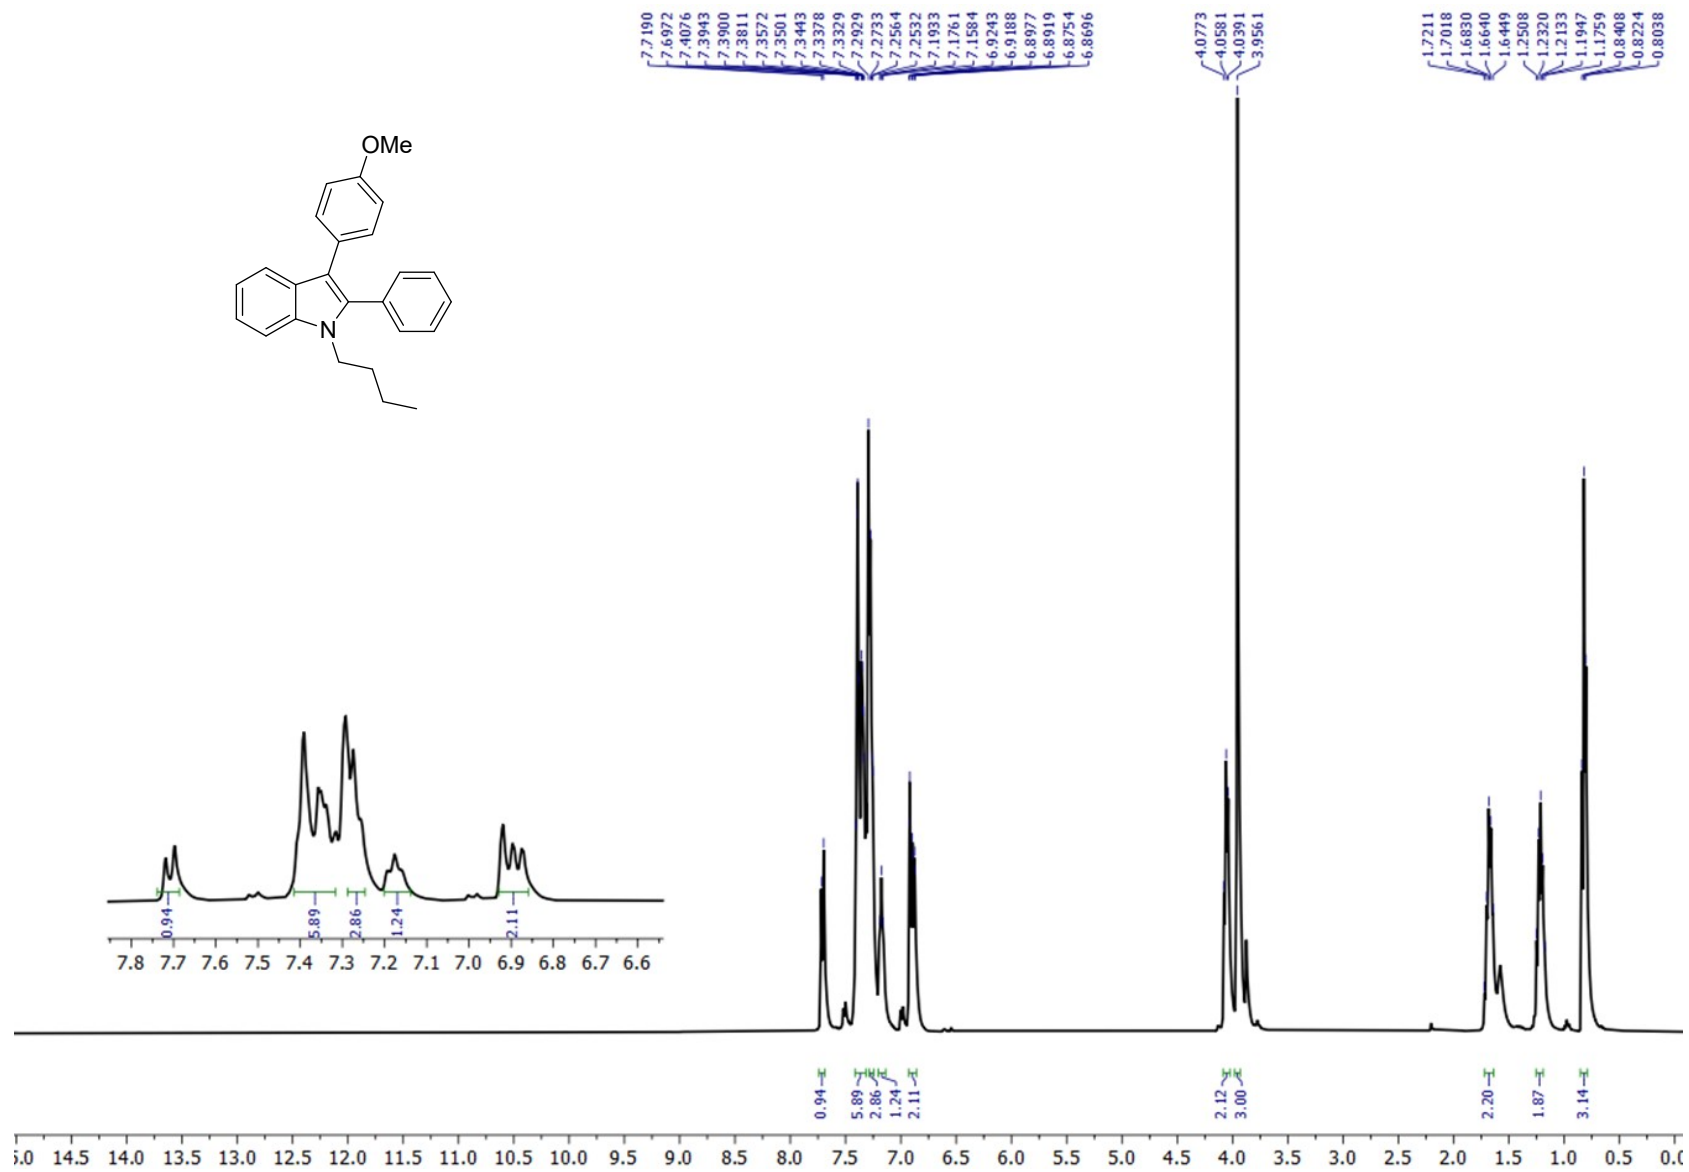

$^{13}\text{C}$  NMR of compound **50** ( $\text{CDCl}_3$ , 125 MHz)

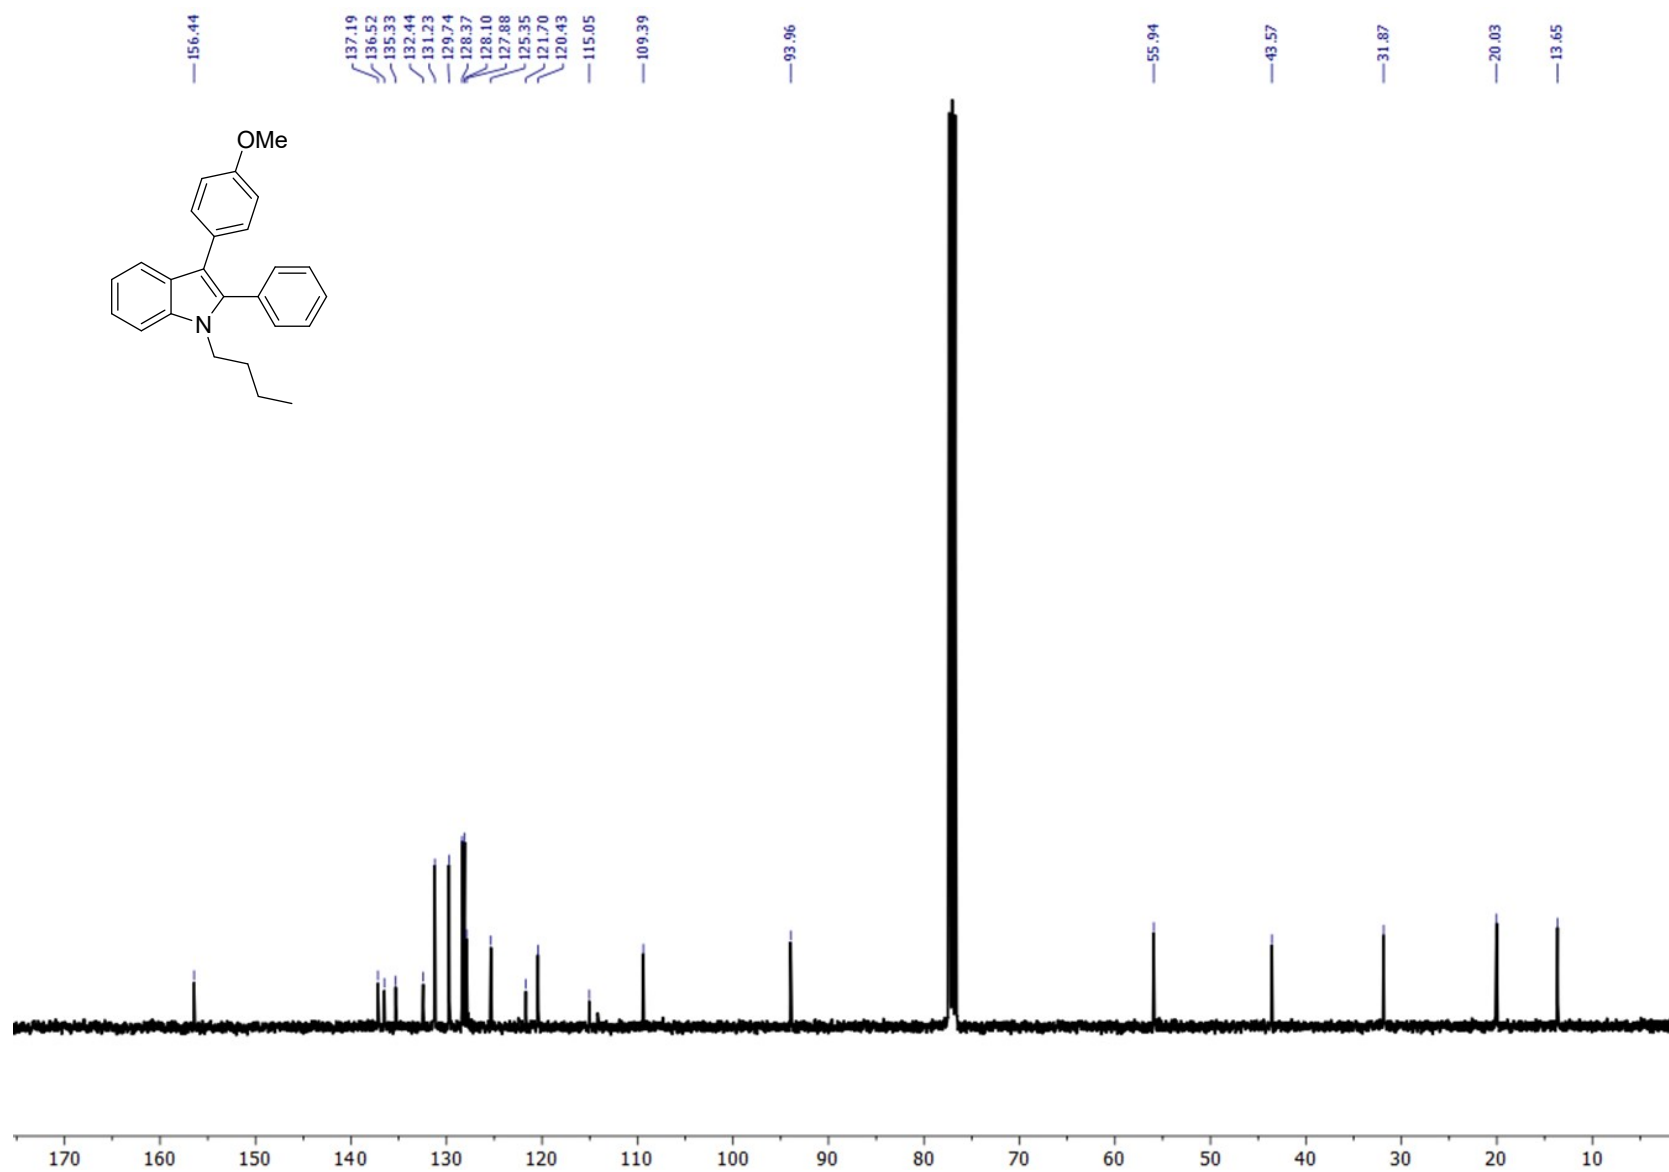

<sup>1</sup>H NMR of Compound **51** (CDCl<sub>3</sub>, 500 MHz)

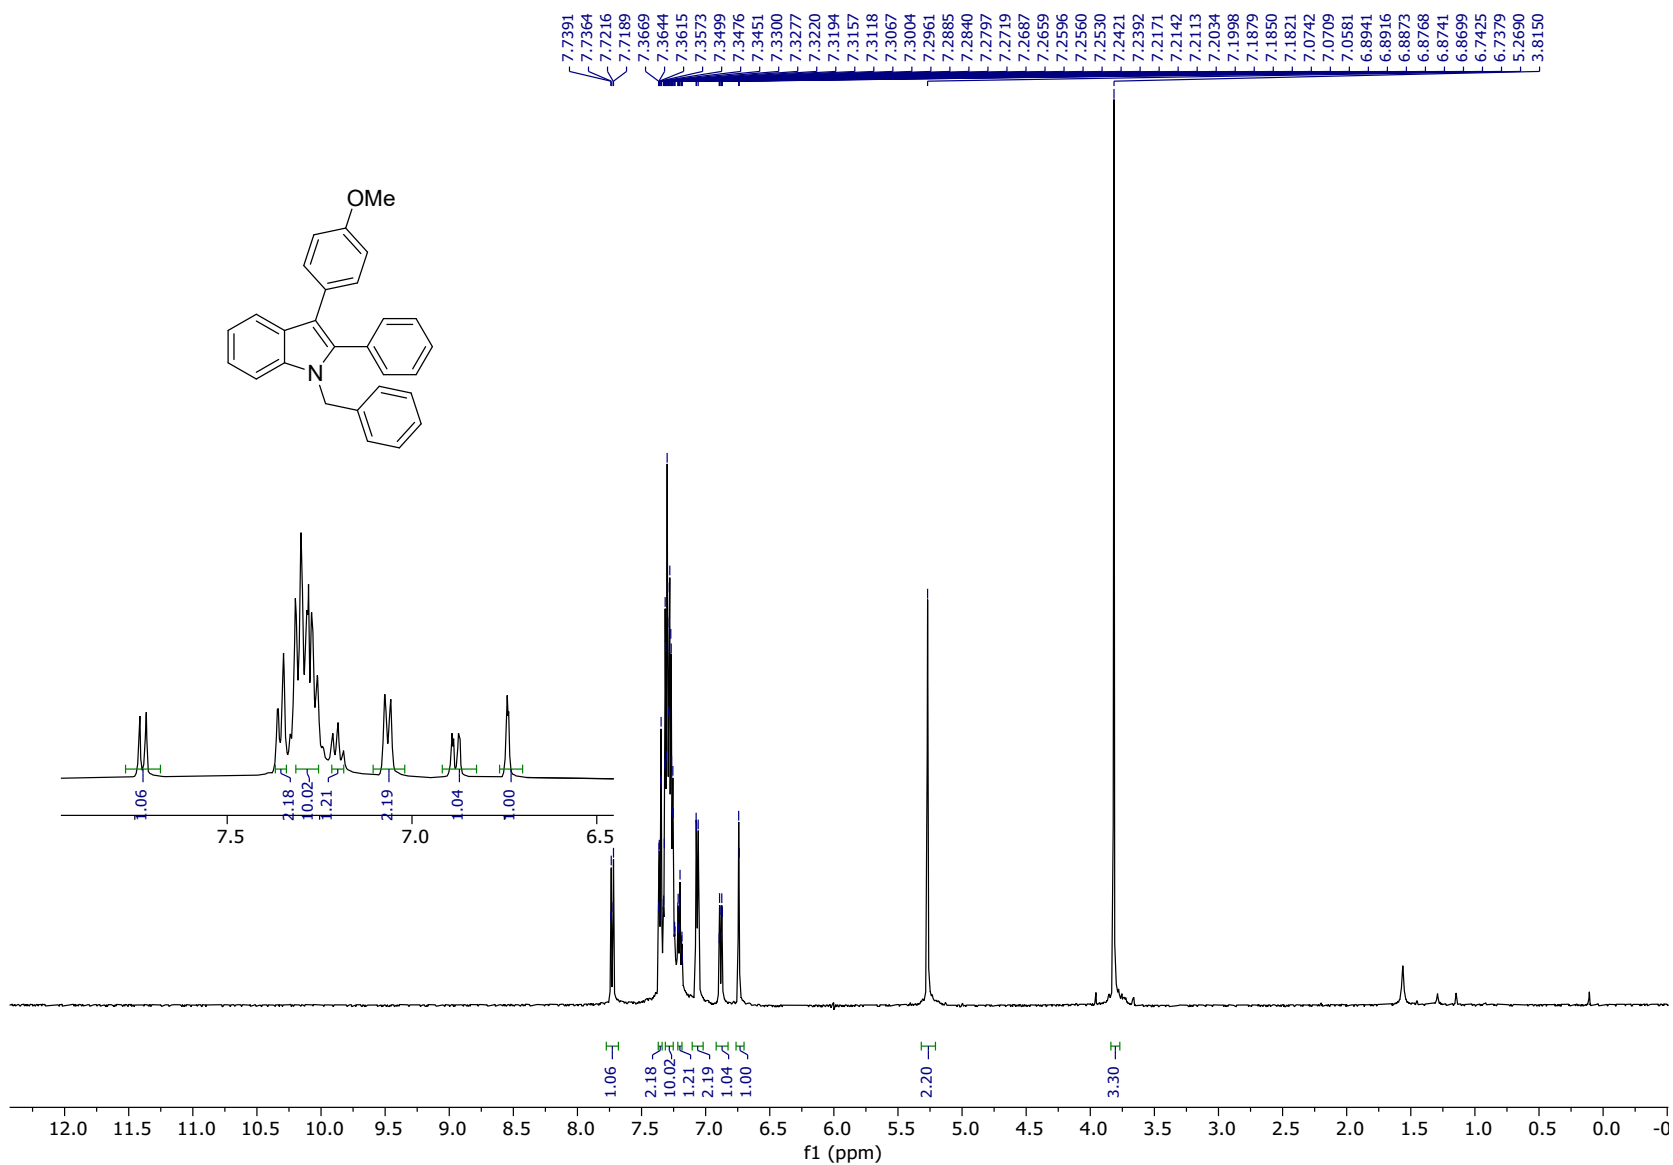



$^{13}\text{C}$  NMR of compound **51** ( $\text{CDCl}_3$ , 125 MHz)

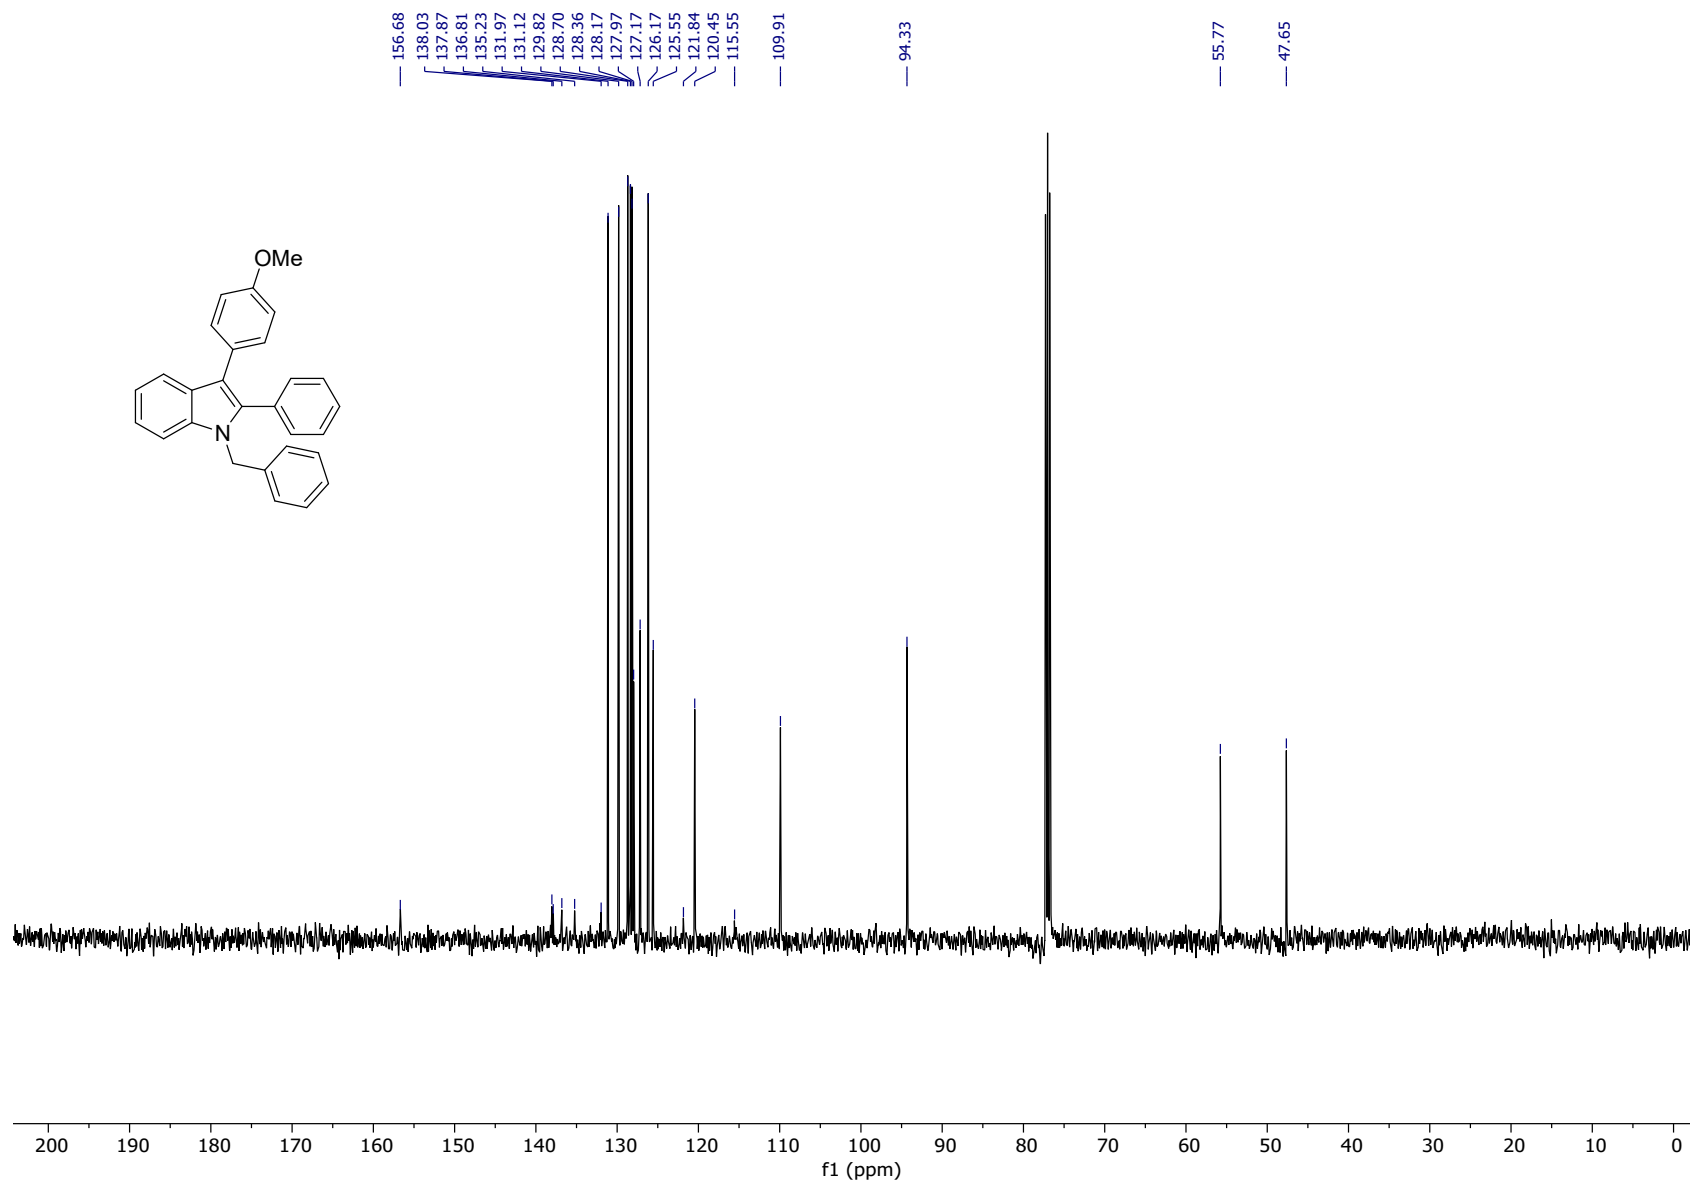

Supplement: d3cc01753b1.pdf [file d3cc01753b1.pdf]
